# Supplementary material for: Redefining ALS: Large-scale proteomic profiling reveals a prolonged pre-diagnostic phase with immune, muscular, metabolic, and brain involvement
Source: Research Square preprint supplement (doi:10.21203/rs.3.rs-7452736/v1), 2025-09-01
Supplement: Supplementary file 2 [file bb891640a71f7571049938f9.xlsx]

## Sheet: S1_demographics
Supplementary Table 1. Demographic characteristics of included EPIC4ND participants
Legend. This table presents selected demographic and clinical characteristics of EPIC participants comprising the EPIC4ALS, EPIC4PD, and EPIC4AD case-cohorts on incident amyotrophic lateral sclerosis (ALS), Parkinson's disease (PD), and Alzheimer's disease (AD) cases, and corresponding non-cases. The variables on education level, smoking status, physical activity, and BMI reflect the status at ba…
	Incident ALS, 5-year washout		Incident PD, 2-year washout		Incident AD, 2-year washout
Variable	Cases	Non-cases	Cases	Non-cases	Cases	Non-cases
N	172	4395	555	3964	413	1274
Sex, n (%) women*	100 (58)	2935 (67)	249 (45)	2597 (66)	286 (69)	803 (63)
Excluded due to wash-out	21	149	23	15	1	3
N events, 5-10 years	33 (19)	-	-	-	-	-
N events, 10-20 years	112 (65)	-	-	-	-	-
N events, >20 years	27 (16)	-	-	-	-	-
Median AAE (IQR)	58 (52-63)	52 (46-59)	59 (54-63)	52 (46-59)	60 (56-63)	49 (43-55)
Min-max AAE	38-76	35-79	38-77	35-79	36-69	35-69
Median AAD (IQR)	73 (67-78)	-	71 (65-75)	-	77 (72-80)	-
Min-max AAD	48-95	-	45-87	-	53-89	-
Median AAC (IQR)	-	71 (64-78)	-	69 (63-76)	-	71 (65-77)
Min-max AAC	-	40-99	-	44-93	-	47-93
Median follow-up time (IQR)	14 (11-19)	18 (16-21)	11 (7-15)	16 (15-18)	17 (14-19)	22 (21-23)
Min-max follow-up time	2025-05-29	2025-05-29	2-24	2-27	2-27	2-28
Education level, n (%)
No education	12 (7)	676 (15)	49 (9)	492 (12)	259 (63)	478 (38)
Primary school	54 (31)	1539 (35)	197 (35)	1488 (38)	108 (26)	455 (36)
Technical/professional school	44 (26)	744 (17)	126 (23)	715 (18)	16 (4)	91 (7)
Secondary school	19 (11)	616 (14)	64 (12)	611 (15)	19 (5)	69 (5)
Longer education	28 (16)	666 (15)	92 (17)	560 (14)	10 (2)	172 (14)
Missing or not specified	15 (9)	154 (4)	27 (5)	98 (2)	1 (0)	9 (1)
Smoking status, n (%)
Never	80 (47)	2194 (50)	277 (50)	1883 (48)	310 (75)	709 (56)
Former	56 (33)	1097 (25)	187 (34)	1025 (26)	43 (10)	221 (17)
Current	29 (17)	1034 (24)	80 (14)	985 (25)	60 (15)	344 (27)
Missing	7 (4)	70 (2)	11 (2)	71 (2)	0 (0)	0 (0)
Physical activity, n (%)
Inactive	44 (26)	1201 (27)	143 (26)	998 (25)	197 (48)	483 (38)
Moderately inactive	49 (28)	1427 (32)	189 (34)	1292 (33)	138 (33)	414 (32)
Moderately active	36 (21)	854 (19)	113 (20)	795 (20)	41 (10)	220 (17)
Active	37 (22)	801 (18)	93 (17)	768 (19)	37 (9)	157 (12)
Missing	6 (3)	112 (3)	17 (3)	111 (3)	0 (0)	0 (0)
BMI (kg/m2), n (%)
<18.5	2 (1)	26 (1)	5 (1)	22 (1)	0 (0)	1 (0)
18.5-24.9	86 (50)	1689 (38)	191 (34)	1582 (40)	36 (9)	289 (23)
25-29.9	56 (33)	1827 (42)	252 (45)	1638 (41)	175 (42)	599 (47)
>30	28 (16)	853 (19)	107 (19)	722 (18)	202 (49)	385 (30)
Center, n (%)
Cambridge	55 (32)	591 (13)	141 (25)	604 (15)	0 (0)	0 (0)
Oxford	19 (11)	171 (4)	0 (0)	0 (0)	0 (0)	0 (0)
Florence	17 (10)	352 (8)	55 (10)	353 (9)	0 (0)	0 (0)
Turin	13 (8)	337 (8)	62 (11)	339 (9)	0 (0)	0 (0)
Varese	1 (1)	150 (3)	3 (1)	242 (6)	0 (0)	0 (0)
Utrecht	19 (11)	563 (13)	36 (6)	570 (14)	0 (0)	0 (0)
Bilthoven	8 (5)	254 (6)	11 (2)	255 (6)	0 (0)	0 (0)
Murcia	5 (3)	535 (12)	46 (8)	538 (14)	122 (30)	450 (35)
Navarra	7 (4)	500 (11)	17 (3)	504 (13)	95 (23)	340 (27)
San Sebastian	5 (3)	464 (11)	30 (5)	464 (12)	69 (17)	194 (15)
Granada	4 (2)	360 (8)	0 (0)	0 (0)	127 (31)	290 (23)
Heidelberg	19 (11)	118 (3)	154 (28)	95 (2)	0 (0)	0 (0)

## Sheet: S2_demogr_centers
Supplementary Table 2. Center-specific demographic characteristics of included EPIC4ALS participants
Legend. This table presents selected demographic and clinical characteristics of the EPIC4ALS case-cohort included in this study upon stratification for center. All variables except clinical data on diagnosis, censoring, and years reflect the status at the time of recruitment. N=number, IQR=interquartile range, AAE=age at examination (recruitment), AAD=age at death, AAC=age at censoring, BMI=body…
Center	Murcia		Navarra		San Sebastian		Granada		Florence		Turin		Varese		Utrecht		Bilthoven		Cambridge		Oxford		Heidelberg
Case status	Cases	Non-cases	Cases	Non-cases	Cases	Non-cases	Cases	Non-cases	Cases	Non-cases	Cases	Non-cases	Cases	Non-cases	Cases	Non-cases	Cases	Non-cases	Cases	Non-cases	Cases	Non-cases	Cases	Non-cases
N	5	535	7	500	5	464	4	360	17	352	13	337	1	150	19	563	8	254	55	591	19	171	19	118
Sex, n (%) women	5 (100)	361 (67)	3 (43)	264 (53)	1 (20)	257 (55)	3 (75)	279 (78)	16 (94)	273 (78)	2 (15)	142 (42)	1 (100)	145 (97)	19 (100)	563 (100)	5 (62)	135 (53)	23 (42)	341 (58)	15 (79)	116 (68)	7 (37)	59 (50)
Median AAE (IQR)	53 (49-60)	49 (42-56)	54 (44-59)	49 (43-54)	54 (51-56)	50 (44-56)	54 (51-57)	51 (44-58)	53 (50-55)	52 (46-57)	54 (47-60)	51 (45-56)	65 (65-65)	51 (45-58)	63 (59-65)	57 (52-63)	57 (50-57)	49 (42-56)	63 (55-69)	59 (51-66)	59 (51-64)	52 (45-61)	56 (53-59)	54 (46-59)
Min-max AAE	49-63	35-69	41-61	35-67	47-57	35-66	44-63	35-67	43-63	35-66	41-63	35-66	65-65	35-66	51-69	49-70	38-58	35-65	43-76	40-79	46-70	35-74	42-65	37-65
Median AAD (IQR)	69 (59-74)	-	69 (60-71)	-	68 (67-70)	-	61 (60-65)	-	69 (65-73)	-	73 (63-80)	-	70 (70-70)	-	73 (71-77)	-	65 (62-69)	-	78 (73-84)	-	71 (63-75)	-	71 (70-73)	-
AAD min-max	57-78	-	48-74	-	58-74	-	60-75	-	53-78	-	58-89	-	70-70	-	66-85	-	52-74	-	59-95	-	58-80	-	57-82	-
Median AAC (IQR)	-	66 (59-73)	-	67 (62-73)	-	68 (62-74)	-	65 (58-73)	-	74 (69-79)	-	74 (69-81)	-	57 (51-64)	-	73 (68-78)	-	65 (58-72)	-	81 (76-87)	-	69 (62-78)	-	74 (67-79)
AAC min-max	-	48-85	-	52-84	-	46-85	-	49-81	-	53-88	-	49-92	-	40-72	-	56-88	-	51-83	-	57-99	-	52-92	-	57-88
Median years time (IQR)	14 (11-15)	17 (16-18)	13 (12-15)	19 (18-19)	14 (14-16)	18 (18-19)	10 (7-12)	14 (14-15)	16 (10-20)	23 (22-24)	19 (16-22)	25 (23-26)	5 (5-5)	6 (5-6)	13 (12-14)	16 (15-17)	15 (8-16)	17 (15-18)	16 (12-21)	25 (18-27)	12 (8-14)	17 (16-18)	15 (11-18)	21 (20-22)
Follow-up time min-max	8-16	5-19	7-19	5-20	11-18	7-20	5-15	5-16	5-25	8-26	11-26	5-28	5-5	5-7	6-16	5-19	5-17	5-19	6-29	5-29	6-20	5-19	5-21	6-24
Education level, n (%)
No education	4 (80)	258 (48)	3 (43)	120 (24)	2 (40)	106 (23)	3 (75)	184 (51)	0 (0)	1 (0)	0 (0)	4 (1)	0 (0)	1 (1)	0 (0)	0 (0)	0 (0)	0 (0)	0 (0)	0 (0)	0 (0)	0 (0)	0 (0)	2 (2)
Primary school	0 (0)	147 (27)	1 (14)	239 (48)	1 (20)	236 (51)	1 (25)	98 (27)	9 (53)	171 (49)	5 (38)	137 (41)	1 (100)	93 (62)	8 (42)	129 (23)	1 (12)	37 (15)	21 (38)	221 (37)	0 (0)	0 (0)	6 (32)	31 (26)
Technical/professional school	0 (0)	24 (4)	0 (0)	40 (8)	2 (40)	58 (12)	0 (0)	16 (4)	2 (12)	40 (11)	2 (15)	57 (17)	0 (0)	19 (13)	6 (32)	152 (27)	6 (75)	79 (31)	19 (35)	186 (31)	1 (5)	32 (19)	6 (32)	41 (35)
Secondary school	0 (0)	25 (5)	0 (0)	39 (8)	0 (0)	25 (5)	0 (0)	19 (5)	4 (24)	91 (26)	3 (23)	81 (24)	0 (0)	28 (19)	4 (21)	169 (30)	1 (12)	70 (28)	3 (5)	49 (8)	3 (16)	14 (8)	1 (5)	6 (5)
Longer education	1 (20)	79 (15)	3 (43)	56 (11)	0 (0)	38 (8)	0 (0)	39 (11)	2 (12)	48 (14)	2 (15)	47 (14)	0 (0)	8 (5)	1 (5)	111 (20)	0 (0)	67 (26)	5 (9)	62 (10)	8 (42)	73 (43)	6 (32)	38 (32)
Missing or not specified	0 (0)	2 (0)	0 (0)	6 (1)	0 (0)	1 (0)	0 (0)	4 (1)	0 (0)	1 (0)	1 (8)	11 (3)	0 (0)	1 (1)	0 (0)	2 (0)	0 (0)	1 (0)	7 (13)	73 (12)	7 (37)	52 (30)	0 (0)	0 (0)
Smoking status, n (%)
Never	5 (100)	335 (63)	2 (29)	238 (48)	1 (20)	234 (50)	4 (100)	239 (66)	9 (53)	157 (45)	6 (46)	142 (42)	0 (0)	106 (71)	12 (63)	252 (45)	3 (38)	77 (30)	23 (42)	252 (43)	8 (42)	100 (58)	7 (37)	62 (53)
Former	0 (0)	87 (16)	2 (29)	87 (17)	2 (40)	92 (20)	0 (0)	56 (16)	3 (18)	105 (30)	3 (23)	90 (27)	0 (0)	20 (13)	5 (26)	186 (33)	4 (50)	81 (32)	21 (38)	201 (34)	7 (37)	59 (35)	9 (47)	33 (28)
Current	0 (0)	113 (21)	3 (43)	175 (35)	2 (40)	138 (30)	0 (0)	65 (18)	5 (29)	89 (25)	1 (8)	91 (27)	1 (100)	22 (15)	2 (11)	123 (22)	1 (12)	94 (37)	7 (13)	90 (15)	4 (21)	12 (7)	3 (16)	22 (19)
Missing	0 (0)	0 (0)	0 (0)	0 (0)	0 (0)	0 (0)	0 (0)	0 (0)	0 (0)	1 (0)	3 (23)	14 (4)	0 (0)	2 (1)	0 (0)	2 (0)	0 (0)	2 (1)	4 (7)	48 (8)	0 (0)	0 (0)	0 (0)	1 (1)
Physical activity, n (%)
Inactive	3 (60)	213 (40)	2 (29)	151 (30)	0 (0)	145 (31)	2 (50)	192 (53)	4 (24)	86 (24)	2 (15)	70 (21)	1 (100)	28 (19)	1 (5)	45 (8)	0 (0)	28 (11)	19 (35)	194 (33)	5 (26)	29 (17)	5 (26)	20 (17)
Moderately inactive	0 (0)	180 (34)	1 (14)	152 (30)	0 (0)	152 (33)	1 (25)	119 (33)	6 (35)	141 (40)	7 (54)	122 (36)	0 (0)	80 (53)	4 (21)	156 (28)	3 (38)	46 (18)	14 (25)	168 (28)	8 (42)	68 (40)	5 (26)	43 (36)
Moderately active	1 (20)	81 (15)	4 (57)	116 (23)	3 (60)	106 (23)	0 (0)	26 (7)	3 (18)	69 (20)	0 (0)	73 (22)	0 (0)	23 (15)	7 (37)	129 (23)	2 (25)	57 (22)	10 (18)	93 (16)	5 (26)	51 (30)	1 (5)	30 (25)
Active	1 (20)	61 (11)	0 (0)	81 (16)	2 (40)	61 (13)	1 (25)	23 (6)	4 (24)	55 (16)	3 (23)	61 (18)	0 (0)	18 (12)	7 (37)	231 (41)	2 (25)	79 (31)	8 (15)	85 (14)	1 (5)	21 (12)	8 (42)	25 (21)
Missing	0 (0)	0 (0)	0 (0)	0 (0)	0 (0)	0 (0)	0 (0)	0 (0)	0 (0)	1 (0)	1 (8)	11 (3)	0 (0)	1 (1)	0 (0)	2 (0)	1 (12)	44 (17)	4 (7)	51 (9)	0 (0)	2 (1)	0 (0)	0 (0)
BMI (kg/m2), n (%)
<18.5	0 (0)	0 (0)	0 (0)	0 (0)	0 (0)	0 (0)	0 (0)	1 (0)	1 (6)	3 (1)	0 (0)	2 (1)	0 (0)	2 (1)	0 (0)	9 (2)	0 (0)	2 (1)	0 (0)	2 (0)	1 (5)	3 (2)	0 (0)	2 (2)
18.5-24.9	2 (40)	114 (21)	2 (29)	119 (24)	0 (0)	125 (27)	0 (0)	57 (16)	10 (59)	188 (53)	8 (62)	171 (51)	1 (100)	76 (51)	10 (53)	289 (51)	2 (25)	123 (48)	30 (55)	274 (46)	13 (68)	102 (60)	8 (42)	51 (43)
25-29.9	0 (0)	234 (44)	5 (71)	235 (47)	5 (100)	241 (52)	2 (50)	176 (49)	5 (29)	121 (34)	2 (15)	131 (39)	0 (0)	51 (34)	5 (26)	193 (34)	4 (50)	101 (40)	20 (36)	248 (42)	2 (11)	50 (29)	6 (32)	46 (39)
>30	3 (60)	187 (35)	0 (0)	146 (29)	0 (0)	98 (21)	2 (50)	126 (35)	1 (6)	40 (11)	3 (23)	33 (10)	0 (0)	21 (14)	4 (21)	72 (13)	2 (25)	28 (11)	5 (9)	67 (11)	3 (16)	16 (9)	5 (26)	19 (16)

## Sheet: S3_summary_stats
Supplementary Table 3. Cox proportional hazard regression results on incident amyotrophic lateral sclerosis in EPIC4ALS
Legend. This table presents the complete summary statistics of the Prentice-weighted Cox proportional hazard regression analyses of 7,285 aptamers in blood plasma on incident ALS (after applying a 5-year wash-out period) stratified for center, sex and 5-year age groups. The "full model" was additionally adjusted for education, body mass index, smoking status, physical activity, menopausal status,…
		Basic model														Full model
		Follow-up: 5-30 years							Follow-up: 5-20 years							Follow-up: 5-30 years							Follow-up: 5-20 years
Protein	SomaScan SeqId	HR	lower CI	upper CI	p	q	n	nevent	HR	lower CI	upper CI	p	q	n	nevent	HR	lower CI	upper CI	p	q	n	nevent	HR	lower CI	upper CI	p	q	n	nevent	min q
SECTM1	seq.13093.6	1.35434	1.19745	1.5318	1.38e-06	0.0100262	4567	172	1.41848	1.24458	1.61667	1.61e-07	0.00117597	4542	145	1.34746	1.18102	1.53736	9.27e-06	0.0675638	4252	150	1.39251	1.20758	1.60575	5.25e-06	0.0191268	4228	124	0.00118
CA3	seq.3799.11	1.35601	1.17391	1.56635	3.48e-05	0.0844885	4567	172	1.43314	1.24088	1.65519	9.75e-07	0.00355213	4542	145	1.38294	1.17582	1.62655	8.98e-05	0.226985	4252	150	1.49127	1.26704	1.75518	1.53e-06	0.0111584	4228	124	0.00355
THAP4	seq.24490.16	1.29135	1.10487	1.5093	0.0013125	0.444046	4567	172	1.41421	1.21662	1.6439	6.37e-06	0.0154794	4542	145	1.28614	1.08895	1.51905	0.00304176	0.72372	4252	150	1.41542	1.20265	1.66584	2.91e-05	0.052045	4228	124	0.0155
KLHL41	seq.23660.112	1.2711	1.12391	1.43757	0.00013331	0.161866	4567	172	1.31858	1.1637	1.49408	1.44e-05	0.0261762	4542	145	1.24079	1.08184	1.4231	0.00203743	0.674666	4252	150	1.30501	1.13616	1.49894	0.000165991	0.139209	4228	124	0.0262
SLC26A7	seq.13979.3	1.29905	1.14878	1.46897	3.03e-05	0.0844885	4567	172	1.32447	1.16139	1.51046	2.77e-05	0.0403334	4542	145	1.26523	1.09651	1.45992	0.00127458	0.580334	4252	150	1.30898	1.12983	1.51653	0.000336225	0.204117	4228	124	0.0403
TINF2	seq.10638.1	0.677616	0.551207	0.833015	0.00022043	0.189587	4567	172	0.64994	0.525267	0.804204	7.33e-05	0.0702262	4542	145	0.696524	0.560929	0.864896	0.00106043	0.580334	4252	150	0.667065	0.533831	0.833552	0.000368685	0.206605	4228	124	0.0702
BTN3A3	seq.17692.2	1.28676	1.13974	1.45274	4.64e-05	0.0844885	4567	172	1.30962	1.14568	1.49702	7.71e-05	0.0702262	4542	145	1.2605	1.10505	1.43782	0.000565677	0.457884	4252	150	1.27377	1.10453	1.46895	0.000878478	0.314496	4228	124	0.0702
B2M	seq.3485.28	1.30127	1.12511	1.50501	0.00038765	0.249107	4567	172	1.34639	1.16295	1.55876	6.89e-05	0.0702262	4542	145	1.31112	1.11758	1.53819	0.000887004	0.538485	4252	150	1.39267	1.18375	1.63847	6.49e-05	0.0788301	4228	124	0.0702
CELA2A	seq.7140.1	1.41046	1.19087	1.67055	6.8e-05	0.0991079	4567	172	1.41217	1.18603	1.68142	0.00010611	0.0858922	4542	145	1.39746	1.15943	1.68437	0.000443627	0.457884	4252	150	1.39323	1.14699	1.69235	0.000831576	0.314496	4228	124	0.0859
CPLX1	seq.18332.17	1.25599	1.10518	1.42738	0.00047872	0.249107	4567	172	1.30881	1.13862	1.50445	0.00015276	0.111283	4542	145	1.27212	1.11337	1.45352	0.000401685	0.457884	4252	150	1.34623	1.16922	1.55005	3.57e-05	0.052045	4228	124	0.052
ZHX3	seq.10036.201	1.27212	1.09137	1.48282	0.00208294	0.523249	4567	172	1.3435	1.15101	1.56819	0.00018216	0.120415	4542	145	1.29698	1.10739	1.51904	0.00125927	0.580334	4252	150	1.3593	1.15815	1.59539	0.000171981	0.139209	4228	124	0.12
DUSP29	seq.23323.25	1.22432	1.08102	1.38661	0.00143871	0.444046	4567	172	1.27542	1.12124	1.4508	0.00021488	0.120415	4542	145	1.21057	1.05397	1.39044	0.00685724	0.794457	4252	150	1.28871	1.11887	1.48433	0.000435124	0.22642	4228	124	0.12
PRSS1	seq.3049.61	1.3178	1.13762	1.52651	0.00023422	0.189587	4567	172	1.34969	1.1519	1.58145	0.00020808	0.120415	4542	145	1.36397	1.15555	1.60998	0.000243601	0.354927	4252	150	1.4109	1.18	1.68697	0.000159788	0.139209	4228	124	0.12
UBE2S	seq.17729.20	1.3672	1.1113	1.68203	0.00309528	0.609436	4567	172	1.46603	1.19223	1.8027	0.00028672	0.124226	4542	145	1.43448	1.17039	1.75816	0.000509579	0.457884	4252	150	1.54594	1.26015	1.89655	2.95e-05	0.052045	4228	124	0.052
CCDC97	seq.23561.4	1.26919	1.09563	1.47024	0.00148653	0.444046	4567	172	1.30919	1.13172	1.51448	0.0002891	0.124226	4542	145	1.19758	1.01015	1.41978	0.0378692	0.92329	4252	150	1.25638	1.06322	1.48464	0.00736871	0.557725	4228	124	0.124
CACNB3	seq.24237.115	1.24192	1.08686	1.4191	0.00145205	0.444046	4567	172	1.28868	1.12351	1.47813	0.00028989	0.124226	4542	145	1.19508	1.03744	1.37668	0.0135397	0.85496	4252	150	1.24884	1.08178	1.4417	0.00242283	0.385949	4228	124	0.124
TMX3	seq.5654.70	1.2429	1.08877	1.41885	0.00128581	0.444046	4567	172	1.2929	1.1257	1.48494	0.00027703	0.124226	4542	145	1.22024	1.06022	1.40441	0.00551387	0.768868	4252	150	1.2745	1.10126	1.47499	0.00113816	0.34082	4228	124	0.124
CPB1	seq.15375.49	1.27212	1.11151	1.45593	0.00047349	0.249107	4567	172	1.30072	1.12335	1.5061	0.00043972	0.153046	4542	145	1.26174	1.09298	1.45657	0.00150586	0.609456	4252	150	1.28938	1.09983	1.51159	0.00173066	0.351098	4228	124	0.153
WTAP	seq.23359.25	0.761081	0.629545	0.9201	0.0047996	0.728439	4567	172	0.6938	0.565534	0.851158	0.00045619	0.153046	4542	145	0.797349	0.65067	0.977095	0.0290061	0.879255	4252	150	0.724993	0.580825	0.904944	0.00446927	0.484706	4228	124	0.153
TFF3	seq.4721.54	1.25444	1.08587	1.44917	0.00207684	0.523249	4567	172	1.30428	1.12408	1.51337	0.00046218	0.153046	4542	145	1.20057	0.999048	1.44274	0.0511948	0.926196	4252	150	1.31009	1.0887	1.57649	0.00423794	0.484706	4228	124	0.153
NELL1	seq.6544.33	0.775434	0.648521	0.927185	0.00528586	0.77015	4567	172	0.706317	0.581456	0.857991	0.0004597	0.153046	4542	145	0.797694	0.656146	0.969779	0.0233354	0.857608	4252	150	0.719901	0.583089	0.888813	0.00224262	0.385949	4228	124	0.153
CEACAM19	seq.7048.4	0.836983	0.68261	1.02627	0.0871302	0.998072	4567	172	0.663088	0.528588	0.831813	0.00038215	0.153046	4542	145	0.85899	0.701885	1.05126	0.140233	0.998408	4252	150	0.685694	0.542121	0.867291	0.001645	0.351098	4228	124	0.153
NDRG1	seq.19215.7	0.716263	0.594647	0.862751	0.00043974	0.249107	4567	172	0.6606	0.52325	0.834004	0.00048967	0.155097	4542	145	0.727757	0.597259	0.886769	0.00162225	0.622005	4252	150	0.669882	0.521132	0.861091	0.00176373	0.351098	4228	124	0.155
PTGDS	seq.10514.5	1.31232	1.09804	1.56841	0.00280524	0.583635	4567	172	1.39392	1.15235	1.68612	0.00062521	0.182185	4542	145	1.27581	1.05087	1.54889	0.01384	0.85496	4252	150	1.39463	1.13412	1.71497	0.00161566	0.351098	4228	124	0.182
FAM189A2	seq.5699.19	0.779001	0.646022	0.939354	0.00891984	0.839944	4567	172	0.707064	0.579987	0.861985	0.00060511	0.182185	4542	145	0.804382	0.656648	0.985353	0.0355083	0.903038	4252	150	0.729675	0.588059	0.905395	0.00419952	0.484706	4228	124	0.182
TRAPPC3	seq.14337.1	1.23127	1.05739	1.43374	0.00739533	0.838517	4567	172	1.30557	1.1171	1.52585	0.00080209	0.217945	4542	145	1.28249	1.08749	1.51247	0.00310977	0.72372	4252	150	1.36914	1.15719	1.61991	0.000250838	0.182736	4228	124	0.183
SLAMF1	seq.7953.20	1.25461	1.05314	1.49461	0.0110919	0.848172	4567	172	1.33902	1.12878	1.58842	0.00080776	0.217945	4542	145	1.2483	1.01913	1.52899	0.0321018	0.879506	4252	150	1.35578	1.11586	1.64728	0.00218898	0.385949	4228	124	0.218
EPHB6	seq.5078.82	1.27951	1.08992	1.50208	0.00259254	0.583635	4567	172	1.32681	1.12005	1.57173	0.00106908	0.263714	4542	145	1.21497	1.01594	1.453	0.0329033	0.879506	4252	150	1.2851	1.06217	1.55483	0.00986765	0.567129	4228	124	0.264
TNFRSF1B	seq.8368.102	1.26086	1.06294	1.49563	0.0077985	0.839944	4567	172	1.35057	1.12845	1.61642	0.00104492	0.263714	4542	145	1.20026	0.99392	1.44943	0.0578763	0.926657	4252	150	1.30365	1.06276	1.59914	0.0109605	0.567129	4228	124	0.264
TWSG1	seq.9234.8	1.22251	1.04498	1.4302	0.0120873	0.848172	4567	172	1.29928	1.11044	1.52024	0.00108599	0.263714	4542	145	1.21089	1.03174	1.42114	0.0191557	0.857608	4252	150	1.29998	1.10954	1.52311	0.0011696	0.34082	4228	124	0.264
CTRB2	seq.5648.28	1.35588	1.1535	1.59377	0.00022293	0.189587	4567	172	1.3385	1.12203	1.59672	0.00119835	0.281613	4542	145	1.32063	1.11552	1.56344	0.00123987	0.580334	4252	150	1.28335	1.06616	1.54479	0.00835908	0.567129	4228	124	0.19
ARL5B	seq.17404.5	1.24305	1.0866	1.42203	0.00152384	0.444046	4567	172	1.26005	1.09405	1.45124	0.0013405	0.287222	4542	145	1.31198	1.13803	1.51253	0.000182826	0.332971	4252	150	1.32139	1.13706	1.53561	0.000277261	0.183622	4228	124	0.184
SHISAL2A	seq.13431.74	1.23602	1.09785	1.39158	0.00045906	0.249107	4567	172	1.22816	1.0837	1.39187	0.00128655	0.287222	4542	145	1.22066	1.07146	1.39065	0.00272119	0.72372	4252	150	1.20256	1.04815	1.37973	0.00852313	0.567129	4228	124	0.249
TEK	seq.3773.15	0.787604	0.651011	0.952857	0.0140132	0.883429	4567	172	0.701619	0.565185	0.870989	0.00131821	0.287222	4542	145	0.809697	0.653933	1.00256	0.0528045	0.926196	4252	150	0.697834	0.546237	0.891504	0.00398895	0.483752	4228	124	0.287
NAGPA	seq.11208.15	0.821155	0.693668	0.972073	0.0220771	0.998072	4567	172	0.752006	0.63083	0.896457	0.00147637	0.298759	4542	145	0.805913	0.666117	0.975048	0.0264208	0.865511	4252	150	0.725809	0.592488	0.889131	0.00196924	0.367844	4228	124	0.299
ANP32C	seq.22398.5	1.2071	1.0459	1.39315	0.0100652	0.839944	4567	172	1.25846	1.09246	1.4497	0.00144661	0.298759	4542	145	1.19484	1.01495	1.40662	0.0324999	0.879506	4252	150	1.25336	1.07109	1.46665	0.0048549	0.484706	4228	124	0.299
CD36	seq.2973.15	0.779665	0.661927	0.918346	0.00288412	0.583635	4567	172	0.757083	0.637427	0.899199	0.0015216	0.299591	4542	145	0.774684	0.654649	0.916729	0.00295685	0.72372	4252	150	0.74386	0.623311	0.887723	0.00103721	0.335204	4228	124	0.3
PDLIM3	seq.22527.4	1.18394	1.03431	1.35521	0.0143103	0.883429	4567	172	1.25866	1.09041	1.45286	0.00167667	0.321436	4542	145	1.16067	0.995039	1.35388	0.0578683	0.926657	4252	150	1.24057	1.05195	1.46301	0.0104106	0.567129	4228	124	0.321
MINPP1	seq.5586.66	0.791805	0.660544	0.949151	0.0115916	0.848172	4567	172	0.721918	0.588472	0.885625	0.00177926	0.332356	4542	145	0.806652	0.667914	0.974208	0.0256569	0.86134	4252	150	0.750707	0.601914	0.936283	0.0109541	0.567129	4228	124	0.332
CASP10	seq.5340.24	1.18908	1.04863	1.34834	0.00692568	0.832729	4567	172	1.22005	1.07541	1.38415	0.00200655	0.365443	4542	145	1.19289	1.04388	1.36316	0.00957571	0.794457	4252	150	1.23581	1.0861	1.40617	0.00131096	0.351098	4228	124	0.351
PNLIPRP1	seq.6627.25	1.27481	1.10977	1.46439	0.00059814	0.290497	4567	172	1.25898	1.08726	1.45783	0.00208227	0.369984	4542	145	1.24944	1.0703	1.45856	0.00479484	0.768868	4252	150	1.23182	1.04546	1.45139	0.0127314	0.618322	4228	124	0.29
DLST	seq.23699.61	0.737512	0.611095	0.890081	0.00150465	0.444046	4567	172	0.744284	0.615877	0.899463	0.00223828	0.388234	4542	145	0.78252	0.642113	0.953628	0.0150739	0.85496	4252	150	0.783415	0.635947	0.965079	0.0217866	0.701783	4228	124	0.388
GM2A	seq.15441.6	1.24547	1.08598	1.42838	0.00169045	0.473651	4567	172	1.26934	1.08857	1.48013	0.00234446	0.397196	4542	145	1.24714	1.07661	1.44469	0.00324053	0.72372	4252	150	1.28102	1.08253	1.5159	0.00393554	0.483752	4228	124	0.397
CST3	seq.2609.59	1.22467	1.04533	1.43477	0.0121149	0.848172	4567	172	1.28491	1.09282	1.51076	0.00240993	0.399008	4542	145	1.26321	1.05928	1.50641	0.00929343	0.794457	4252	150	1.36092	1.13169	1.63659	0.0010583	0.335204	4228	124	0.335
KDR	seq.3651.50	0.805295	0.671797	0.965323	0.0191993	0.98498	4567	172	0.750947	0.623506	0.904435	0.00253959	0.411132	4542	145	0.847983	0.702036	1.02427	0.0870519	0.983043	4252	150	0.791041	0.650231	0.962344	0.0190889	0.701783	4228	124	0.411
RNASE6	seq.5646.20	1.24324	1.06002	1.45812	0.00743813	0.838517	4567	172	1.29469	1.09398	1.53222	0.0026542	0.415786	4542	145	1.25209	1.05978	1.47929	0.00823115	0.794457	4252	150	1.33162	1.11353	1.59242	0.00169857	0.351098	4228	124	0.351
DCT	seq.21390.68	0.79747	0.66502	0.956301	0.0145988	0.883429	4567	172	0.717839	0.578131	0.891309	0.00268249	0.415786	4542	145	0.769968	0.632172	0.937801	0.00936855	0.794457	4252	150	0.691776	0.544687	0.878587	0.00251706	0.385949	4228	124	0.386
ATF5	seq.23771.17	1.15079	0.993582	1.33288	0.0609193	0.998072	4567	172	1.24332	1.0778	1.43425	0.00280886	0.426303	4542	145	1.10669	0.936436	1.30789	0.234272	0.998408	4252	150	1.18919	1.00802	1.40291	0.0399034	0.747455	4228	124	0.426
HNF4A	seq.10041.3	1.1535	0.934623	1.42364	0.183456	0.998072	4567	172	1.39426	1.12016	1.73542	0.00291962	0.434071	4542	145	1.1656	0.924816	1.46908	0.194301	0.998408	4252	150	1.45646	1.14184	1.85776	0.00245951	0.385949	4228	124	0.386
IGFBP4	seq.2950.57	1.24516	1.0626	1.45907	0.0067138	0.832729	4567	172	1.30309	1.09292	1.55368	0.00317669	0.453769	4542	145	1.26744	1.05346	1.52487	0.0120025	0.85496	4252	150	1.347	1.10081	1.64824	0.00381898	0.483752	4228	124	0.454
CPB1	seq.6356.3	1.26387	1.08393	1.47369	0.00280437	0.583635	4567	172	1.27977	1.08652	1.50739	0.00314231	0.453769	4542	145	1.26031	1.0693	1.48544	0.00579658	0.768868	4252	150	1.27231	1.06347	1.52216	0.00847246	0.567129	4228	124	0.454
RNF34	seq.13386.248	0.833293	0.702382	0.988604	0.036488	0.998072	4567	172	0.739846	0.605075	0.904634	0.00331523	0.46445	4542	145	0.775446	0.633444	0.949282	0.0137258	0.85496	4252	150	0.665398	0.524464	0.844205	0.000794595	0.314496	4228	124	0.314
ARF3	seq.12578.13	1.19806	1.04161	1.378	0.0113746	0.848172	4567	172	1.23598	1.07018	1.42746	0.00393876	0.480261	4542	145	1.23035	1.06787	1.41756	0.00412175	0.768868	4252	150	1.26774	1.09481	1.46799	0.00152152	0.351098	4228	124	0.351
None	seq.24423.9	1.23543	1.09151	1.39832	0.00082068	0.367466	4567	172	1.21749	1.066	1.3905	0.00369783	0.480261	4542	145	1.18729	1.03289	1.36478	0.0157261	0.85496	4252	150	1.18732	1.02234	1.37891	0.0244786	0.701783	4228	124	0.367
BCL11A	seq.24486.1	1.24847	1.09575	1.42248	0.0008575	0.367466	4567	172	1.25009	1.07529	1.45331	0.00367767	0.480261	4542	145	1.20336	1.03652	1.39706	0.0150549	0.85496	4252	150	1.21996	1.03029	1.44454	0.0211048	0.701783	4228	124	0.367
PUS1	seq.11201.19	0.816462	0.699127	0.95349	0.010417	0.839944	4567	172	0.767489	0.641956	0.917569	0.00368347	0.480261	4542	145	0.791706	0.670408	0.934951	0.00591031	0.768868	4252	150	0.752143	0.623418	0.907447	0.00293848	0.41167	4228	124	0.412
KIN	seq.13476.16	0.800348	0.65513	0.977754	0.0292401	0.998072	4567	172	0.695985	0.543737	0.890863	0.00400784	0.480261	4542	145	0.768512	0.603253	0.979043	0.0330518	0.879506	4252	150	0.658548	0.4995	0.868238	0.0030584	0.420386	4228	124	0.42
PRC1	seq.11591.43	1.21365	1.06144	1.38768	0.0046249	0.728439	4567	172	1.21593	1.06466	1.38869	0.00392273	0.480261	4542	145	1.18149	1.01803	1.37121	0.0281507	0.87466	4252	150	1.20111	1.0461	1.37909	0.00933994	0.567129	4228	124	0.48
ADAM29	seq.13549.15	0.791037	0.642536	0.97386	0.0271271	0.998072	4567	172	0.709027	0.560449	0.896994	0.00415617	0.480261	4542	145	0.716684	0.569207	0.902371	0.00459772	0.768868	4252	150	0.671363	0.509515	0.884622	0.00463923	0.484706	4228	124	0.48
RNASET2	seq.16913.8	1.23717	1.00907	1.51684	0.0406774	0.998072	4567	172	1.3609	1.10106	1.68206	0.00436431	0.480261	4542	145	1.23113	0.972241	1.55895	0.0842964	0.983043	4252	150	1.38661	1.08747	1.76804	0.00838023	0.567129	4228	124	0.48
TRIM27	seq.22814.1	0.822954	0.716519	0.945199	0.00582251	0.800321	4567	172	0.792149	0.674987	0.929646	0.00432618	0.480261	4542	145	0.805885	0.691205	0.939591	0.00585848	0.768868	4252	150	0.785717	0.655289	0.942106	0.00921579	0.567129	4228	124	0.48
PSMC3IP	seq.23309.11	0.835577	0.680743	1.02563	0.0857995	0.998072	4567	172	0.761706	0.633751	0.915496	0.00372013	0.480261	4542	145	0.792082	0.657177	0.954678	0.0144097	0.85496	4252	150	0.79336	0.663934	0.948017	0.0108499	0.567129	4228	124	0.48
TNFRSF1B	seq.3152.57	1.20635	1.02545	1.41916	0.0236259	0.998072	4567	172	1.2757	1.08018	1.50661	0.00412184	0.480261	4542	145	1.15565	0.957105	1.39539	0.132542	0.998408	4252	150	1.23121	1.01775	1.48945	0.0322648	0.718877	4228	124	0.48
C2	seq.3186.2	0.903745	0.779993	1.04713	0.17797	0.998072	4567	172	0.816448	0.711372	0.937045	0.00391299	0.480261	4542	145	0.955863	0.806167	1.13336	0.603446	0.998408	4252	150	0.84679	0.72173	0.993521	0.0413778	0.755476	4228	124	0.48
CDK2|CCNA2	seq.3357.67	1.16729	1.03867	1.31185	0.00940751	0.839944	4567	172	1.19692	1.05752	1.3547	0.00443808	0.480261	4542	145	1.13144	0.991268	1.29143	0.0672457	0.949223	4252	150	1.15335	0.997334	1.33378	0.054355	0.791838	4228	124	0.48
PRSS2	seq.5034.79	1.22717	1.05512	1.42729	0.00790506	0.839944	4567	172	1.26743	1.07603	1.49287	0.0045488	0.480261	4542	145	1.24741	1.05218	1.47886	0.0109059	0.854295	4252	150	1.30365	1.08119	1.57189	0.00547465	0.49238	4228	124	0.48
ART4	seq.6576.1	1.24863	1.05348	1.47994	0.0104429	0.839944	4567	172	1.30146	1.08491	1.56124	0.00454435	0.480261	4542	145	1.22809	1.01968	1.47909	0.0303536	0.879255	4252	150	1.30313	1.06546	1.59382	0.00996004	0.567129	4228	124	0.48
JAML	seq.8232.90	1.22527	1.0379	1.44646	0.0164239	0.912791	4567	172	1.30291	1.0864	1.56257	0.00432122	0.480261	4542	145	1.1781	0.975495	1.42279	0.0886946	0.986413	4252	150	1.22469	0.995524	1.50661	0.0551674	0.791838	4228	124	0.48
CEMIP2	seq.8992.1	0.811217	0.678708	0.969596	0.0214866	0.998072	4567	172	0.746392	0.610473	0.912573	0.00434401	0.480261	4542	145	0.794115	0.648438	0.97252	0.0257813	0.861546	4252	150	0.73742	0.590397	0.921054	0.00725586	0.557725	4228	124	0.48
MYL6B	seq.14227.21	1.22734	1.07951	1.3954	0.00175682	0.474017	4567	172	1.23116	1.06587	1.42208	0.00469519	0.488636	4542	145	1.20385	1.04449	1.38753	0.0104437	0.836067	4252	150	1.20909	1.02896	1.42074	0.0210632	0.701783	4228	124	0.474
PDIA4	seq.7146.5	0.708893	0.562453	0.89346	0.00356594	0.633606	4567	172	0.724877	0.57959	0.906583	0.00481198	0.493736	4542	145	0.656553	0.501659	0.859273	0.00217854	0.69003	4252	150	0.70163	0.544346	0.904359	0.00621387	0.525773	4228	124	0.494
SPOCK2	seq.5491.12	0.815041	0.670158	0.991246	0.0405553	0.998072	4567	172	0.757001	0.622235	0.920955	0.00538176	0.529812	4542	145	0.809218	0.648221	1.0102	0.0614411	0.938361	4252	150	0.713401	0.572653	0.888743	0.00259595	0.385949	4228	124	0.386
MYL3	seq.18376.19	1.20434	1.02944	1.40895	0.0202132	0.998072	4567	172	1.26866	1.07308	1.49987	0.00534007	0.529812	4542	145	1.19897	1.0039	1.43194	0.0451771	0.92329	4252	150	1.2831	1.06018	1.55288	0.0104616	0.567129	4228	124	0.53
HSPB6	seq.19127.1	1.32587	1.06398	1.65221	0.0119903	0.848172	4567	172	1.38526	1.10148	1.74215	0.00532952	0.529812	4542	145	1.30655	1.02143	1.67126	0.0332716	0.879506	4252	150	1.37837	1.06679	1.78097	0.0141084	0.629808	4228	124	0.53
TXNDC5	seq.11212.7	1.20645	1.00277	1.4515	0.0466605	0.998072	4567	172	1.30799	1.08225	1.58082	0.00547452	0.531759	4542	145	1.24979	1.0299	1.51662	0.0239212	0.857608	4252	150	1.38121	1.13282	1.68405	0.00140807	0.351098	4228	124	0.351
CD74	seq.6974.6	0.83424	0.682287	1.02003	0.0772894	0.998072	4567	172	0.716277	0.565516	0.907229	0.00564938	0.538003	4542	145	0.777883	0.608552	0.994331	0.0449212	0.92329	4252	150	0.657118	0.489398	0.882316	0.00522613	0.49238	4228	124	0.492
SIL1	seq.21338.44	0.789873	0.664485	0.938921	0.00748162	0.838517	4567	172	0.727705	0.580915	0.911587	0.00568651	0.538003	4542	145	0.745996	0.608551	0.914485	0.00479634	0.768868	4252	150	0.686318	0.522732	0.901098	0.0067348	0.533293	4228	124	0.533
LEFTY2	seq.15503.15	1.30819	1.06024	1.61412	0.0122249	0.848172	4567	172	1.36881	1.09488	1.71127	0.00585707	0.540111	4542	145	1.41993	1.12866	1.78636	0.00275955	0.72372	4252	150	1.51141	1.18418	1.92906	0.000906576	0.314496	4228	124	0.314
RND3	seq.15439.21	0.742736	0.601454	0.917207	0.00573047	0.800321	4567	172	0.700582	0.543949	0.902317	0.00584871	0.540111	4542	145	0.722681	0.575373	0.907703	0.00522768	0.768868	4252	150	0.69789	0.535951	0.90876	0.00757924	0.557725	4228	124	0.54
TREM1	seq.9266.1	1.1861	1.01543	1.38546	0.0313028	0.998072	4567	172	1.24974	1.06621	1.46487	0.00593922	0.54084	4542	145	1.20386	0.99847	1.45149	0.0519011	0.926196	4252	150	1.22843	1.00858	1.4962	0.0408604	0.751869	4228	124	0.541
EPHA7	seq.15580.2	1.18207	1.04527	1.33677	0.00768509	0.839944	4567	172	1.19119	1.05123	1.34979	0.00607922	0.546754	4542	145	1.14543	0.993425	1.3207	0.0615968	0.938771	4252	150	1.14168	0.987526	1.3199	0.0733911	0.801521	4228	124	0.547
COL20A1	seq.8804.39	0.808258	0.669463	0.97583	0.0267925	0.998072	4567	172	0.738872	0.59496	0.917596	0.00617985	0.549027	4542	145	0.782558	0.633224	0.967109	0.0232333	0.857608	4252	150	0.713869	0.564513	0.90274	0.00488738	0.484706	4228	124	0.485
FBLIM1	seq.21357.12	1.21303	1.02915	1.42976	0.0213045	0.998072	4567	172	1.2811	1.07097	1.53246	0.0067259	0.569747	4542	145	1.27394	1.07795	1.50556	0.00450253	0.768868	4252	150	1.36132	1.13723	1.62956	0.000775569	0.314496	4228	124	0.314
C1orf185	seq.10667.78	0.834525	0.706205	0.986161	0.0337042	0.998072	4567	172	0.751738	0.612084	0.923254	0.00649815	0.569747	4542	145	0.822573	0.677297	0.99901	0.0488392	0.92329	4252	150	0.710795	0.553303	0.913115	0.00755705	0.557725	4228	124	0.558
TXLNA	seq.15698.6	1.17646	1.03407	1.33845	0.013547	0.881162	4567	172	1.20917	1.05424	1.38687	0.00662788	0.569747	4542	145	1.19683	1.03764	1.38044	0.0136081	0.85496	4252	150	1.22416	1.04773	1.43031	0.0108609	0.567129	4228	124	0.567
QSOX2	seq.8397.147	0.8234	0.696662	0.973194	0.0226889	0.998072	4567	172	0.787127	0.662045	0.935841	0.00670792	0.569747	4542	145	0.827558	0.690397	0.991969	0.0406368	0.92329	4252	150	0.802378	0.666337	0.966192	0.0201878	0.701783	4228	124	0.57
TMED2	seq.10761.5	1.18084	1.04657	1.33235	0.00695326	0.832729	4567	172	1.18899	1.04866	1.3481	0.00690279	0.578009	4542	145	1.20245	1.06472	1.358	0.0029748	0.72372	4252	150	1.2042	1.05641	1.37267	0.00541243	0.49238	4228	124	0.492
SSX4	seq.24465.28	0.690476	0.524329	0.909272	0.00835841	0.839944	4567	172	0.624947	0.443993	0.879652	0.007035	0.582386	4542	145	0.610717	0.438252	0.851052	0.00358428	0.725319	4252	150	0.553772	0.370514	0.827672	0.0039456	0.483752	4228	124	0.484
DNAAF8	seq.23607.1	1.2341	1.08988	1.39742	0.00090892	0.367858	4567	172	1.20986	1.05261	1.3906	0.00732332	0.599443	4542	145	1.28792	1.13438	1.46223	9.35e-05	0.226985	4252	150	1.25667	1.08847	1.45087	0.0018314	0.351098	4228	124	0.227
FSTL3	seq.3438.10	1.32633	1.08327	1.62391	0.00624777	0.827546	4567	172	1.34492	1.08249	1.67096	0.00745688	0.603593	4542	145	1.26848	1.01664	1.58271	0.0351939	0.903038	4252	150	1.28549	1.00738	1.64038	0.0434753	0.755476	4228	124	0.604
CETP	seq.7131.8	0.788224	0.659206	0.942494	0.00906967	0.839944	4567	172	0.769354	0.634562	0.932777	0.00762785	0.610647	4542	145	0.740977	0.600814	0.913838	0.00507516	0.768868	4252	150	0.716914	0.572052	0.898458	0.00385549	0.483752	4228	124	0.484
ACYP2	seq.12812.25	1.255	0.958653	1.64297	0.0983825	0.998072	4567	172	1.42819	1.09535	1.86218	0.00847001	0.642439	4542	145	1.26527	0.955827	1.67489	0.10012	0.998408	4252	150	1.47857	1.13246	1.93046	0.00405064	0.483752	4228	124	0.484
ALDOC	seq.9876.20	0.816325	0.676583	0.984929	0.0341305	0.998072	4567	172	0.768943	0.631666	0.936053	0.00882831	0.642439	4542	145	0.81504	0.667425	0.995302	0.0448353	0.92329	4252	150	0.749696	0.608165	0.924165	0.00695881	0.545106	4228	124	0.545
VWC2	seq.11121.56	1.22061	1.04023	1.43226	0.0145452	0.883429	4567	172	1.26179	1.06022	1.50169	0.00883375	0.642439	4542	145	1.23745	1.05276	1.45453	0.00978043	0.800566	4252	150	1.26545	1.05664	1.51554	0.0105047	0.567129	4228	124	0.567
KL	seq.15384.15	0.827517	0.686354	0.997712	0.047255	0.998072	4567	172	0.760669	0.620352	0.932726	0.00855314	0.642439	4542	145	0.803342	0.648956	0.994455	0.0443188	0.92329	4252	150	0.732183	0.578324	0.926975	0.0095964	0.567129	4228	124	0.567
CTSZ	seq.4971.1	1.16825	1.00331	1.3603	0.045225	0.998072	4567	172	1.23589	1.05525	1.44744	0.00861221	0.642439	4542	145	1.18492	0.994525	1.41177	0.0576207	0.926638	4252	150	1.28463	1.06385	1.55122	0.00923206	0.567129	4228	124	0.567
PZP	seq.6580.29	1.44992	1.13129	1.85831	0.00334297	0.633606	4567	172	1.45997	1.10313	1.93223	0.00813402	0.642439	4542	145	1.44266	1.09933	1.89321	0.00821853	0.794457	4252	150	1.44518	1.05483	1.97999	0.0218904	0.701783	4228	124	0.634
DUSP4	seq.10035.6	0.843479	0.695763	1.02256	0.0831115	0.998072	4567	172	0.708062	0.546484	0.917413	0.00899503	0.642439	4542	145	0.839194	0.690069	1.02054	0.0790414	0.980121	4252	150	0.724706	0.55744	0.942163	0.0161729	0.671453	4228	124	0.642
ARTN	seq.2939.10	1.15334	1.01321	1.31285	0.0308846	0.998072	4567	172	1.19755	1.04617	1.37082	0.00893028	0.642439	4542	145	1.15998	1.0081	1.33475	0.0381986	0.92329	4252	150	1.1971	1.02798	1.39405	0.0206051	0.701783	4228	124	0.642
TGFBR3	seq.3009.3	1.27822	1.07058	1.52613	0.00664599	0.832729	4567	172	1.2949	1.06772	1.57041	0.00864538	0.642439	4542	145	1.18103	0.974658	1.43109	0.0895016	0.986413	4252	150	1.19445	0.964256	1.47961	0.103786	0.801521	4228	124	0.642
ANGPTL8	seq.7183.102	1.1975	1.04745	1.36903	0.00831992	0.839944	4567	172	1.2097	1.05011	1.39353	0.0083541	0.642439	4542	145	1.1424	0.983337	1.32719	0.0818001	0.980121	4252	150	1.19571	1.02255	1.39821	0.025135	0.701783	4228	124	0.642
TFF3	seq.8323.163	1.18762	1.03031	1.36896	0.0177	0.927659	4567	172	1.21608	1.05158	1.40631	0.00833338	0.642439	4542	145	1.13949	0.947692	1.3701	0.164939	0.998408	4252	150	1.22241	1.01717	1.46907	0.0322333	0.718877	4228	124	0.642
ADAM7	seq.10753.31	1.18575	1.03476	1.35878	0.0142197	0.883429	4567	172	1.2073	1.04655	1.39275	0.00976212	0.6846	4542	145	1.23412	1.07024	1.42309	0.00380618	0.749405	4252	150	1.26074	1.08609	1.46348	0.00232318	0.385949	4228	124	0.386
EFCAB14	seq.9514.46	0.714509	0.573908	0.889556	0.00264001	0.583635	4567	172	0.735685	0.582516	0.929129	0.00996123	0.6846	4542	145	0.721479	0.579561	0.898148	0.00348631	0.725319	4252	150	0.757408	0.59542	0.963465	0.023626	0.701783	4228	124	0.584
ARSA	seq.3583.54	1.14995	0.972936	1.35916	0.101362	0.998072	4567	172	1.24202	1.05368	1.46401	0.00978646	0.6846	4542	145	1.15337	0.955272	1.39254	0.137793	0.998408	4252	150	1.26634	1.0495	1.52798	0.0137334	0.6253	4228	124	0.625
None	seq.23335.31	0.817729	0.677346	0.987206	0.0362603	0.998072	4567	172	0.736011	0.582975	0.929221	0.00995913	0.6846	4542	145	0.819672	0.661617	1.01548	0.0688497	0.951571	4252	150	0.742621	0.571396	0.965155	0.0260667	0.701783	4228	124	0.685
CPA1	seq.19760.26	1.19067	1.0415	1.36121	0.0106074	0.839944	4567	172	1.20468	1.04474	1.3891	0.0104	0.708076	4542	145	1.18995	1.03386	1.36962	0.0153469	0.85496	4252	150	1.19455	1.02578	1.39109	0.0221613	0.701783	4228	124	0.702
HEY1	seq.22374.56	1.18755	1.0357	1.36166	0.0137987	0.883429	4567	172	1.21746	1.04695	1.41575	0.0105873	0.709133	4542	145	1.18835	1.02802	1.37369	0.0196107	0.857608	4252	150	1.22097	1.03563	1.43947	0.0174643	0.693946	4228	124	0.694
ELL2	seq.11494.4	0.786234	0.634545	0.974185	0.0278673	0.998072	4567	172	0.723721	0.564751	0.92744	0.0106102	0.709133	4542	145	0.842042	0.686287	1.03315	0.0994514	0.998408	4252	150	0.773051	0.60116	0.994092	0.0448369	0.760992	4228	124	0.709
TFPI2	seq.9233.71	0.840417	0.704707	1.00226	0.053006	0.998072	4567	172	0.786164	0.653389	0.945921	0.0108018	0.715374	4542	145	0.879804	0.729603	1.06093	0.179998	0.998408	4252	150	0.807165	0.658991	0.988656	0.0384282	0.747455	4228	124	0.715
TSN	seq.12477.42	1.1949	1.04273	1.36928	0.0104051	0.839944	4567	172	1.18223	1.03909	1.34508	0.0110085	0.722498	4542	145	1.18071	1.02134	1.36494	0.0247386	0.857608	4252	150	1.20191	1.04858	1.37766	0.00826151	0.567129	4228	124	0.567
IL1RAPL2	seq.5082.51	1.2101	1.06255	1.37813	0.00404611	0.68698	4567	172	1.19726	1.04168	1.37608	0.0112436	0.731337	4542	145	1.16902	1.00237	1.36336	0.0465661	0.92329	4252	150	1.15506	0.971223	1.37368	0.103133	0.801521	4228	124	0.687
CRISP3	seq.3187.52	1.13381	1.00458	1.27967	0.0419563	0.998072	4567	172	1.17472	1.03702	1.33071	0.0113599	0.732364	4542	145	1.09668	0.95491	1.25949	0.191314	0.998408	4252	150	1.13314	0.975697	1.31598	0.101496	0.801521	4228	124	0.732
SMR3A	seq.7838.27	1.17968	1.04243	1.33498	0.00882914	0.839944	4567	172	1.1873	1.03927	1.35641	0.0115066	0.735311	4542	145	1.18935	1.03175	1.37101	0.0168006	0.857608	4252	150	1.20097	1.03149	1.39828	0.0182979	0.701783	4228	124	0.702
POLR2F	seq.20448.7	0.769836	0.6313	0.938773	0.00976099	0.839944	4567	172	0.771142	0.630161	0.943664	0.0116387	0.737288	4542	145	0.71988	0.566839	0.914241	0.00703317	0.794457	4252	150	0.711767	0.551923	0.917905	0.0087898	0.567129	4228	124	0.567
TIMM23	seq.22809.32	0.864003	0.75538	0.988246	0.0329674	0.998072	4567	172	0.820117	0.702334	0.957651	0.0121745	0.740025	4542	145	0.873375	0.761511	1.00167	0.0528529	0.926196	4252	150	0.82737	0.708811	0.96576	0.0163276	0.671453	4228	124	0.671
DEFB136	seq.9332.6	1.14405	1.01741	1.28644	0.024551	0.998072	4567	172	1.17118	1.03538	1.3248	0.011976	0.740025	4542	145	1.13271	1.00198	1.28051	0.046419	0.92329	4252	150	1.16372	1.02486	1.3214	0.0193511	0.701783	4228	124	0.702
NBL1	seq.2944.66	1.16521	1.02065	1.33025	0.0236686	0.998072	4567	172	1.20274	1.04121	1.38934	0.012113	0.740025	4542	145	1.13501	0.978458	1.31661	0.0944431	0.997127	4252	150	1.17931	0.997394	1.3944	0.0536715	0.791838	4228	124	0.74
BNIP3L	seq.7835.2	1.16849	1.037	1.31666	0.010576	0.839944	4567	172	1.18172	1.03708	1.34653	0.0121898	0.740025	4542	145	1.1396	1.00249	1.29546	0.0457207	0.92329	4252	150	1.14667	0.999835	1.31506	0.0502717	0.786682	4228	124	0.74
SERPINF1	seq.9211.19	1.20408	1.01411	1.42962	0.0340069	0.998072	4567	172	1.27084	1.05416	1.53206	0.0119699	0.740025	4542	145	1.15037	0.954664	1.38619	0.140927	0.998408	4252	150	1.22163	0.998203	1.49507	0.0520715	0.788633	4228	124	0.74
RIC8A	seq.25245.22	1.1082	0.946086	1.2981	0.20295	0.998072	4567	172	1.2234	1.04429	1.43323	0.012539	0.742886	4542	145	1.17824	1.00511	1.38118	0.0430867	0.92329	4252	150	1.30609	1.11787	1.52601	0.000770047	0.314496	4228	124	0.314
DSC2	seq.13126.52	1.18933	1.02455	1.38061	0.0226829	0.998072	4567	172	1.23211	1.04572	1.45171	0.0126226	0.742886	4542	145	1.2241	1.03209	1.45183	0.0201847	0.857608	4252	150	1.28453	1.06372	1.55117	0.00927253	0.567129	4228	124	0.567
CD46	seq.17682.1	1.27691	1.07016	1.52361	0.00668066	0.832729	4567	172	1.28661	1.05605	1.5675	0.0123727	0.742886	4542	145	1.24244	1.03307	1.49424	0.021136	0.857608	4252	150	1.24794	1.00904	1.54339	0.0410504	0.751869	4228	124	0.743
CXCL13	seq.3487.32	1.19125	1.04297	1.3606	0.00986816	0.839944	4567	172	1.18565	1.03711	1.35545	0.0126449	0.742886	4542	145	1.18426	1.01778	1.37798	0.0286727	0.87466	4252	150	1.17402	1.00356	1.37344	0.045026	0.760992	4228	124	0.743
GOLM2	seq.8838.10	0.829833	0.679091	1.01404	0.0681934	0.998072	4567	172	0.757783	0.608523	0.943654	0.0132051	0.769594	4542	145	0.816739	0.663717	1.00504	0.0558117	0.926638	4252	150	0.752648	0.600447	0.943428	0.013693	0.6253	4228	124	0.625
TRAPPC6A	seq.24635.25	0.818669	0.687268	0.975194	0.0249999	0.998072	4567	172	0.766468	0.62058	0.946652	0.0135518	0.77736	4542	145	0.764797	0.61896	0.944996	0.0129875	0.85496	4252	150	0.731913	0.570322	0.93929	0.014203	0.629808	4228	124	0.63
RBP2	seq.19803.34	1.11822	0.966312	1.29402	0.133617	0.998072	4567	172	1.19963	1.03832	1.386	0.0134991	0.77736	4542	145	1.0156	0.853298	1.20877	0.861697	0.998408	4252	150	1.0914	0.920002	1.29474	0.315653	0.83919	4228	124	0.777
TMCO5A	seq.6907.17	0.860051	0.696296	1.06232	0.161805	0.998072	4567	172	0.751299	0.598502	0.943104	0.0137029	0.779886	4542	145	0.784263	0.618379	0.994646	0.0450401	0.92329	4252	150	0.710427	0.549051	0.919233	0.00930654	0.567129	4228	124	0.567
DCTN2	seq.5879.51	1.13651	0.948622	1.36162	0.165163	0.998072	4567	172	1.24373	1.04507	1.48014	0.0140281	0.786111	4542	145	1.12199	0.935496	1.34565	0.214585	0.998408	4252	150	1.22983	1.02918	1.46958	0.0228123	0.701783	4228	124	0.702
CAPN3	seq.12385.4	1.18215	1.05107	1.32957	0.00525877	0.77015	4567	172	1.16966	1.03221	1.32541	0.0140073	0.786111	4542	145	1.15249	1.00986	1.31526	0.0352367	0.903038	4252	150	1.14097	0.986299	1.3199	0.0760002	0.801521	4228	124	0.77
MSLN	seq.3893.64	1.13152	0.990441	1.2927	0.0689679	0.998072	4567	172	1.187	1.03491	1.36144	0.0142646	0.788748	4542	145	1.15573	1.00492	1.32919	0.0424855	0.92329	4252	150	1.23348	1.06544	1.42802	0.00497858	0.484706	4228	124	0.485
MAEA	seq.21477.105	1.13288	0.991365	1.29459	0.0668616	0.998072	4567	172	1.17616	1.03283	1.33939	0.0144008	0.788748	4542	145	1.16172	1.02176	1.32084	0.022095	0.857608	4252	150	1.19884	1.05381	1.36383	0.00583857	0.502138	4228	124	0.502
SEMA6B	seq.5121.3	0.781975	0.639514	0.956171	0.0165393	0.912791	4567	172	0.760455	0.61077	0.946825	0.014342	0.788748	4542	145	0.813729	0.660291	1.00282	0.0531659	0.926196	4252	150	0.772061	0.613877	0.971007	0.0269996	0.701783	4228	124	0.702
SPR	seq.9287.6	0.777005	0.626612	0.963494	0.0215142	0.998072	4567	172	0.718472	0.551157	0.936578	0.0145082	0.788748	4542	145	0.806051	0.650684	0.998516	0.0484278	0.92329	4252	150	0.735258	0.554378	0.975154	0.0327906	0.718877	4228	124	0.719
NUCB1	seq.10451.11	1.14041	0.98595	1.31906	0.0768213	0.998072	4567	172	1.20727	1.03755	1.40474	0.0148107	0.799228	4542	145	1.13962	0.980135	1.32505	0.0892921	0.986413	4252	150	1.19825	1.02384	1.40236	0.0242236	0.701783	4228	124	0.702
GPC5	seq.4991.12	1.27104	1.08879	1.4838	0.00238658	0.579541	4567	172	1.24112	1.04181	1.47857	0.0155806	0.816582	4542	145	1.19171	0.996806	1.42472	0.0542438	0.926196	4252	150	1.14017	0.924385	1.40632	0.220404	0.802419	4228	124	0.58
CXCL1	seq.2985.35	1.20305	1.02589	1.41079	0.0229349	0.998072	4567	172	1.23397	1.04072	1.4631	0.0155503	0.816582	4542	145	1.20728	1.0244	1.42281	0.0245959	0.857608	4252	150	1.23469	1.03477	1.47323	0.0193209	0.701783	4228	124	0.702
NDUFAF3	seq.23254.31	1.14624	1.00707	1.30463	0.0387622	0.998072	4567	172	1.19655	1.03478	1.38362	0.0154662	0.816582	4542	145	1.11017	0.960025	1.28379	0.158625	0.998408	4252	150	1.16285	0.992812	1.36201	0.0614069	0.801124	4228	124	0.801
ACOT12	seq.23601.43	0.806322	0.674968	0.963238	0.0176515	0.927659	4567	172	0.782219	0.64136	0.954016	0.0153203	0.816582	4542	145	0.861161	0.732555	1.01234	0.0700905	0.951571	4252	150	0.853491	0.717375	1.01543	0.0739019	0.801521	4228	124	0.802
HSPB3	seq.23324.6	0.908846	0.776026	1.0644	0.23572	0.998072	4567	172	0.821687	0.699908	0.964655	0.0164092	0.853864	4542	145	0.906955	0.79024	1.04091	0.164669	0.998408	4252	150	0.856695	0.729637	1.00588	0.0589679	0.801124	4228	124	0.801
CD209	seq.22576.2	0.817978	0.685657	0.975836	0.025635	0.998072	4567	172	0.785677	0.64423	0.95818	0.0172267	0.874322	4542	145	0.829227	0.687428	1.00028	0.0503328	0.926196	4252	150	0.792562	0.641843	0.978674	0.0307488	0.715235	4228	124	0.715
EPHA6	seq.22587.37	1.31726	1.08777	1.59516	0.00478131	0.728439	4567	172	1.29224	1.04611	1.59629	0.0174024	0.874322	4542	145	1.30757	1.04899	1.62991	0.0170609	0.857608	4252	150	1.29648	1.01188	1.66113	0.0400359	0.747455	4228	124	0.728
UBE2M	seq.19111.10	1.10468	0.957084	1.27505	0.173653	0.998072	4567	172	1.18453	1.03032	1.36181	0.0173219	0.874322	4542	145	1.074	0.922979	1.24973	0.355818	0.998408	4252	150	1.16596	1.0084	1.34815	0.0381794	0.747455	4228	124	0.747
GOLM1	seq.17456.53	0.782678	0.650374	0.941895	0.0094974	0.839944	4567	172	0.783831	0.641608	0.95758	0.0171102	0.874322	4542	145	0.797783	0.649969	0.979212	0.0307003	0.879255	4252	150	0.815021	0.64989	1.02211	0.076615	0.801521	4228	124	0.802
MBD4	seq.3891.56	1.16805	0.998275	1.3667	0.0525671	0.998072	4567	172	1.20908	1.03442	1.41322	0.0170736	0.874322	4542	145	1.12092	0.932512	1.34738	0.22407	0.998408	4252	150	1.16001	0.961627	1.39932	0.120878	0.801521	4228	124	0.802
SCUBE3	seq.16773.29	0.804584	0.666173	0.971752	0.0239762	0.998072	4567	172	0.768261	0.617697	0.955525	0.0178468	0.890504	4542	145	0.803433	0.650443	0.992409	0.0422849	0.92329	4252	150	0.755327	0.590158	0.966722	0.0258259	0.701783	4228	124	0.702
CD209	seq.3029.52	0.85844	0.724306	1.01741	0.0782654	0.998072	4567	172	0.802607	0.668711	0.963313	0.0182064	0.902269	4542	145	0.863767	0.718438	1.03849	0.119199	0.998408	4252	150	0.799747	0.653673	0.978463	0.0298874	0.711807	4228	124	0.712
VSIG4	seq.17678.28	1.21153	1.0326	1.42146	0.0185965	0.96768	4567	172	1.23217	1.03527	1.46651	0.0187615	0.903785	4542	145	1.22121	1.01532	1.46887	0.0338919	0.886748	4252	150	1.26414	1.03106	1.5499	0.0241854	0.701783	4228	124	0.702
CFD	seq.13678.169	1.30913	1.06379	1.61104	0.0109577	0.848172	4567	172	1.30484	1.04474	1.62968	0.0189814	0.903785	4542	145	1.31459	1.05076	1.64467	0.0166991	0.857608	4252	150	1.30318	1.02539	1.65624	0.0303874	0.711807	4228	124	0.712
UBE2C	seq.12556.7	0.810807	0.683053	0.962455	0.0165095	0.912791	4567	172	0.794502	0.656132	0.962052	0.0184601	0.903785	4542	145	0.790518	0.645407	0.968257	0.0231014	0.857608	4252	150	0.774034	0.610676	0.98109	0.0341877	0.718877	4228	124	0.719
C18orf32	seq.8236.8	0.787739	0.642364	0.966016	0.0218956	0.998072	4567	172	0.738586	0.573712	0.950842	0.0187174	0.903785	4542	145	0.786654	0.623802	0.99202	0.042591	0.92329	4252	150	0.727339	0.543382	0.973573	0.0323525	0.718877	4228	124	0.719
ATF6B	seq.11387.3	0.841401	0.692801	1.02187	0.0815508	0.998072	4567	172	0.775547	0.627693	0.958227	0.0185028	0.903785	4542	145	0.908886	0.733967	1.12549	0.381033	0.998408	4252	150	0.828255	0.651265	1.05334	0.124468	0.801521	4228	124	0.802
EDN3	seq.15383.200	0.852384	0.677657	1.07216	0.17236	0.998072	4567	172	0.735276	0.568725	0.950603	0.0189468	0.903785	4542	145	0.894154	0.717359	1.11452	0.319557	0.998408	4252	150	0.794672	0.617811	1.02216	0.0735611	0.801521	4228	124	0.802
APOL1	seq.11510.51	1.21326	1.00661	1.46233	0.042443	0.998072	4567	172	1.26451	1.03834	1.53995	0.0195858	0.920993	4542	145	1.19992	0.973796	1.47855	0.0871269	0.983043	4252	150	1.28908	1.02824	1.6161	0.0277081	0.701925	4228	124	0.702
THY1	seq.20564.53	1.2655	1.06002	1.51082	0.00919191	0.839944	4567	172	1.26066	1.03781	1.53135	0.0195956	0.920993	4542	145	1.27503	1.05781	1.53686	0.0107801	0.853618	4252	150	1.27945	1.03705	1.57851	0.0214791	0.701783	4228	124	0.702
ADAM28	seq.21681.10	1.17113	1.0194	1.34545	0.0256529	0.998072	4567	172	1.19636	1.02884	1.39114	0.0198341	0.921802	4542	145	1.21707	1.06246	1.39417	0.00459607	0.768868	4252	150	1.24432	1.07106	1.44561	0.00427244	0.484706	4228	124	0.485
LYSMD3	seq.10563.13	0.803056	0.66456	0.970415	0.0231501	0.998072	4567	172	0.792588	0.651756	0.963851	0.0198659	0.921802	4542	145	0.78088	0.635354	0.959737	0.0187451	0.857608	4252	150	0.751912	0.600339	0.941754	0.0130474	0.6253	4228	124	0.625
SPARCL1	seq.4467.49	0.88744	0.741777	1.06171	0.191751	0.998072	4567	172	0.799642	0.662031	0.965857	0.0203117	0.930633	4542	145	0.866386	0.716513	1.04761	0.138861	0.998408	4252	150	0.778216	0.638108	0.949088	0.0132879	0.6253	4228	124	0.625
PNLIP	seq.15613.16	1.19919	1.05091	1.36839	0.00698902	0.832729	4567	172	1.19445	1.02813	1.38767	0.0201984	0.930633	4542	145	1.19878	1.03888	1.3833	0.0130596	0.85496	4252	150	1.19227	1.01415	1.40168	0.0331529	0.718877	4228	124	0.719
KLRK1	seq.14095.1	0.882411	0.734011	1.06081	0.182994	0.998072	4567	172	0.791786	0.649204	0.965683	0.0211822	0.934842	4542	145	0.791485	0.649941	0.963855	0.0200071	0.857608	4252	150	0.735581	0.581849	0.92993	0.0102486	0.567129	4228	124	0.567
SERPINF1	seq.7735.17	1.13648	0.980624	1.3171	0.0891302	0.998072	4567	172	1.21316	1.02972	1.42929	0.0208815	0.934842	4542	145	1.14505	0.970976	1.35033	0.107415	0.998408	4252	150	1.24176	1.0323	1.49372	0.0216053	0.701783	4228	124	0.702
RCVRN	seq.14334.3	0.817916	0.674238	0.99221	0.0414156	0.998072	4567	172	0.725037	0.551437	0.953287	0.0213018	0.934842	4542	145	0.85114	0.716062	1.0117	0.0675374	0.949223	4252	150	0.748419	0.572635	0.978166	0.0338694	0.718877	4228	124	0.719
POTEM	seq.7967.38	0.805969	0.669954	0.969599	0.0221741	0.998072	4567	172	0.781124	0.633779	0.962725	0.0205482	0.934842	4542	145	0.772146	0.636067	0.937337	0.00894285	0.794457	4252	150	0.79104	0.63529	0.984973	0.0361407	0.731347	4228	124	0.731
WNT16	seq.21942.14	0.868353	0.732281	1.02971	0.104523	0.998072	4567	172	0.802748	0.665911	0.967703	0.0212051	0.934842	4542	145	0.831605	0.693106	0.997779	0.047265	0.92329	4252	150	0.80185	0.651089	0.987518	0.0376908	0.747455	4228	124	0.747
GPT2	seq.21339.19	0.786374	0.563324	1.09774	0.157933	0.998072	4567	172	0.607629	0.398049	0.927556	0.0209734	0.934842	4542	145	0.754655	0.505758	1.12604	0.168008	0.998408	4252	150	0.608532	0.369342	1.00263	0.0512109	0.787059	4228	124	0.787
HHIP	seq.10833.64	1.19002	1.01747	1.39183	0.0295046	0.998072	4567	172	1.21609	1.03026	1.43545	0.0207621	0.934842	4542	145	1.15051	0.95993	1.37893	0.129164	0.998408	4252	150	1.16099	0.949075	1.42022	0.146585	0.801968	4228	124	0.802
BTN3A2	seq.21433.3	1.23355	1.04238	1.45978	0.01456	0.883429	4567	172	1.26433	1.03497	1.54451	0.0216416	0.943679	4542	145	1.24343	1.02978	1.5014	0.0235106	0.857608	4252	150	1.30631	1.02639	1.66257	0.0298776	0.711807	4228	124	0.712
SEZ6L	seq.19563.3	1.31789	1.0896	1.59402	0.00445292	0.720878	4567	172	1.27882	1.0365	1.57778	0.0217623	0.943679	4542	145	1.32559	1.05747	1.6617	0.014499	0.85496	4252	150	1.27815	0.995563	1.64094	0.0542144	0.791838	4228	124	0.721
IGDCC3	seq.11952.1	0.829005	0.674936	1.01824	0.0738321	0.998072	4567	172	0.785367	0.638637	0.965811	0.0220398	0.9469	4542	145	0.82823	0.663063	1.03454	0.0967577	0.998408	4252	150	0.755058	0.589252	0.96752	0.0263494	0.701783	4228	124	0.702
PTPMT1	seq.21167.33	0.94332	0.785319	1.13311	0.532715	0.998072	4567	172	0.775483	0.62374	0.96414	0.0220965	0.9469	4542	145	1.01795	0.833274	1.24355	0.861728	0.998408	4252	150	0.836704	0.657919	1.06407	0.146046	0.801968	4228	124	0.802
UBE2G2	seq.9199.6	1.08177	0.912503	1.28244	0.365287	0.998072	4567	172	1.21998	1.0272	1.44893	0.0234615	0.947797	4542	145	1.15209	0.953253	1.39241	0.143	0.998408	4252	150	1.32874	1.10479	1.5981	0.0025431	0.385949	4228	124	0.386
VAV3	seq.9830.109	1.10453	0.923981	1.32037	0.274928	0.998072	4567	172	1.21665	1.02788	1.44008	0.0226241	0.947797	4542	145	1.14306	0.949884	1.37552	0.156882	0.998408	4252	150	1.29868	1.09436	1.54116	0.00276834	0.397137	4228	124	0.397
DBT	seq.23673.9	1.23246	0.967568	1.56987	0.0904644	0.998072	4567	172	1.33912	1.03883	1.72621	0.0241909	0.947797	4542	145	1.32198	1.03496	1.6886	0.0254042	0.858165	4252	150	1.44013	1.11874	1.85385	0.00464214	0.484706	4228	124	0.485
IDI1	seq.17712.7	1.2283	0.943908	1.59839	0.125923	0.998072	4567	172	1.3135	1.03688	1.66393	0.0238125	0.947797	4542	145	1.29732	0.994781	1.69187	0.0546843	0.926196	4252	150	1.39356	1.10105	1.76378	0.00576472	0.502138	4228	124	0.502
DECR2	seq.18343.10	1.18452	1.00249	1.39961	0.0466832	0.998072	4567	172	1.21646	1.02397	1.44515	0.0257804	0.947797	4542	145	1.21015	1.02641	1.42678	0.0231935	0.857608	4252	150	1.26166	1.06941	1.48847	0.00585885	0.502138	4228	124	0.502
PAPLN	seq.11254.13	0.789454	0.65446	0.952294	0.0134778	0.881162	4567	172	0.784845	0.634467	0.970864	0.0255837	0.947797	4542	145	0.716601	0.573459	0.895473	0.00337769	0.72372	4252	150	0.699274	0.541039	0.903788	0.00627896	0.525773	4228	124	0.526
CLUAP1	seq.23307.7	1.1265	0.946985	1.34005	0.178642	0.998072	4567	172	1.20149	1.02381	1.40999	0.0245597	0.947797	4542	145	1.17115	0.987523	1.38893	0.0694161	0.951571	4252	150	1.23993	1.06222	1.44738	0.00643481	0.527302	4228	124	0.527
FABP1	seq.11516.7	1.19428	1.02181	1.39587	0.02567	0.998072	4567	172	1.21016	1.02603	1.42733	0.0235042	0.947797	4542	145	1.2513	1.05122	1.48946	0.0116732	0.85496	4252	150	1.29225	1.06685	1.56529	0.00875015	0.567129	4228	124	0.567
COLEC12	seq.5457.5	0.892488	0.749333	1.06299	0.202254	0.998072	4567	172	0.809298	0.673741	0.972129	0.0236838	0.947797	4542	145	0.872205	0.711643	1.06899	0.187754	0.998408	4252	150	0.759077	0.61434	0.937914	0.0106541	0.567129	4228	124	0.567
LDLRAD4	seq.9004.24	1.08207	0.919389	1.27353	0.342675	0.998072	4567	172	1.1877	1.024	1.37757	0.0229978	0.947797	4542	145	1.11896	0.947443	1.32154	0.185488	0.998408	4252	150	1.22384	1.04785	1.42939	0.0107683	0.567129	4228	124	0.567
MASP1	seq.8091.16	0.780063	0.642512	0.947062	0.0120887	0.848172	4567	172	0.785017	0.636068	0.968847	0.0241446	0.947797	4542	145	0.752413	0.617778	0.91639	0.00468372	0.768868	4252	150	0.762392	0.614627	0.945681	0.0135835	0.6253	4228	124	0.625
PLXNB2	seq.9216.100	0.89697	0.740468	1.08655	0.266356	0.998072	4567	172	0.790128	0.644983	0.967937	0.0229245	0.947797	4542	145	0.872421	0.713639	1.06653	0.182995	0.998408	4252	150	0.764061	0.615813	0.947999	0.0144756	0.629808	4228	124	0.63
EREG	seq.4956.2	0.810573	0.670683	0.979641	0.0297951	0.998072	4567	172	0.802685	0.661688	0.973725	0.0257363	0.947797	4542	145	0.753402	0.599178	0.947323	0.0153891	0.85496	4252	150	0.75787	0.604415	0.950286	0.0163172	0.671453	4228	124	0.671
PAIP1	seq.12430.78	0.87627	0.744884	1.03083	0.111019	0.998072	4567	172	0.776262	0.622303	0.968311	0.0247351	0.947797	4542	145	0.873408	0.736858	1.03526	0.118652	0.998408	4252	150	0.769471	0.61713	0.959418	0.0199097	0.701783	4228	124	0.702
DHX38	seq.13645.14	0.941001	0.786035	1.12652	0.507726	0.998072	4567	172	0.798827	0.658142	0.969585	0.0230562	0.947797	4542	145	0.902403	0.749788	1.08608	0.277299	0.998408	4252	150	0.78148	0.63308	0.964666	0.0217444	0.701783	4228	124	0.702
AKR1B1	seq.16606.85	1.17914	0.958425	1.45069	0.119135	0.998072	4567	172	1.27828	1.03364	1.58083	0.0234952	0.947797	4542	145	1.21464	0.96528	1.52843	0.0971986	0.998408	4252	150	1.31327	1.04056	1.65745	0.0217428	0.701783	4228	124	0.702
PTP4A1	seq.17812.2	0.755351	0.576631	0.989462	0.0416588	0.998072	4567	172	0.646539	0.440367	0.949235	0.0260205	0.947797	4542	145	0.729069	0.534822	0.993867	0.045617	0.92329	4252	150	0.595532	0.375897	0.943498	0.0272621	0.701783	4228	124	0.702
PHF6	seq.22529.31	0.739681	0.588091	0.930345	0.00996485	0.839944	4567	172	0.784806	0.63521	0.969633	0.0247167	0.947797	4542	145	0.721419	0.558991	0.931045	0.0121079	0.85496	4252	150	0.758406	0.595535	0.96582	0.0249643	0.701783	4228	124	0.702
ATP5PF	seq.7788.1	1.18385	0.969494	1.44559	0.0977209	0.998072	4567	172	1.26812	1.03108	1.55967	0.0244579	0.947797	4542	145	1.20013	0.973404	1.47966	0.0876966	0.983043	4252	150	1.29221	1.0406	1.60465	0.0203318	0.701783	4228	124	0.702
TFF2	seq.9191.8	1.18339	0.989364	1.41547	0.0653335	0.998072	4567	172	1.25094	1.02867	1.52122	0.0248816	0.947797	4542	145	1.2417	1.01832	1.51408	0.0324027	0.879506	4252	150	1.28383	1.03237	1.59654	0.0246769	0.701783	4228	124	0.702
TLR1	seq.11149.3	0.870372	0.721718	1.04965	0.146242	0.998072	4567	172	0.760952	0.598514	0.967476	0.0257545	0.947797	4542	145	0.853428	0.68659	1.06081	0.153258	0.998408	4252	150	0.728599	0.548775	0.967346	0.028555	0.711377	4228	124	0.711
PSG11	seq.7846.44	0.985536	0.846327	1.14764	0.851246	0.998072	4567	172	0.826165	0.699406	0.975898	0.0246345	0.947797	4542	145	0.982334	0.837592	1.15209	0.826518	0.998408	4252	150	0.819501	0.685479	0.979727	0.0289043	0.711377	4228	124	0.711
LTA4H	seq.3204.2	1.33238	1.09401	1.62269	0.00432612	0.716268	4567	172	1.28942	1.03488	1.60657	0.0234766	0.947797	4542	145	1.34534	1.09158	1.65808	0.00540696	0.768868	4252	150	1.26811	1.00056	1.6072	0.0494552	0.783219	4228	124	0.716
ABO	seq.9253.52	0.830264	0.712784	0.967107	0.0168633	0.923679	4567	172	0.826775	0.701277	0.974732	0.0235316	0.947797	4542	145	0.829743	0.705029	0.976519	0.0247081	0.857608	4252	150	0.835189	0.699508	0.997187	0.0464656	0.769132	4228	124	0.769
OSBPL11	seq.12878.60	1.15027	0.996864	1.32729	0.0552395	0.998072	4567	172	1.18495	1.0216	1.37443	0.0249405	0.947797	4542	145	1.13703	0.97299	1.32872	0.106194	0.998408	4252	150	1.1778	1.00005	1.38715	0.0499267	0.786107	4228	124	0.786
INSL3	seq.5723.4	0.935836	0.777705	1.12612	0.482532	0.998072	4567	172	0.808111	0.670139	0.974489	0.0257111	0.947797	4542	145	0.921525	0.772224	1.09969	0.364809	0.998408	4252	150	0.835614	0.696097	1.00309	0.0539962	0.791838	4228	124	0.792
TNFAIP3	seq.14009.65	0.786641	0.600239	1.03093	0.0819914	0.998072	4567	172	0.727417	0.549834	0.962354	0.0258324	0.947797	4542	145	0.839053	0.649614	1.08374	0.178922	0.998408	4252	150	0.815021	0.629377	1.05542	0.120909	0.801521	4228	124	0.802
REG3A	seq.15304.1	1.14702	0.965098	1.36322	0.11952	0.998072	4567	172	1.23018	1.0282	1.47184	0.0235784	0.947797	4542	145	1.10892	0.915777	1.34279	0.289661	0.998408	4252	150	1.18644	0.974128	1.44504	0.0892379	0.801521	4228	124	0.802
RPA2	seq.19264.6	1.08713	0.955096	1.23741	0.206036	0.998072	4567	172	1.15314	1.01779	1.3065	0.0252951	0.947797	4542	145	1.04338	0.901725	1.20729	0.568384	0.998408	4252	150	1.12634	0.979135	1.29569	0.095927	0.801521	4228	124	0.802
TBXAS1	seq.8098.37	0.794805	0.651648	0.96941	0.0234135	0.998072	4567	172	0.768152	0.609038	0.968836	0.0259238	0.947797	4542	145	0.813426	0.662045	0.999421	0.049355	0.924297	4252	150	0.807105	0.639202	1.01911	0.0717169	0.801521	4228	124	0.802
B3GALT1	seq.9541.15	0.814477	0.681442	0.973484	0.0241107	0.998072	4567	172	0.809169	0.670848	0.976009	0.0268364	0.949572	4542	145	0.689664	0.557231	0.85357	0.000636936	0.464008	4252	150	0.699633	0.555919	0.880498	0.00232787	0.385949	4228	124	0.386
LEFTY2	seq.15503.20	1.2444	1.05396	1.46925	0.00987553	0.839944	4567	172	1.23483	1.02492	1.48774	0.0264876	0.949572	4542	145	1.30741	1.09355	1.56309	0.00326804	0.72372	4252	150	1.32878	1.08765	1.62337	0.00539527	0.49238	4228	124	0.492
RAB27A	seq.9504.19	0.855051	0.745911	0.980162	0.0246015	0.998072	4567	172	0.833536	0.709191	0.979683	0.0271726	0.949572	4542	145	0.826681	0.707667	0.965711	0.0163978	0.857608	4252	150	0.783959	0.652135	0.942431	0.00956316	0.567129	4228	124	0.567
XYLT2	seq.21572.91	0.784507	0.629068	0.978353	0.0312207	0.998072	4567	172	0.739396	0.565063	0.967512	0.0277547	0.949572	4542	145	0.656567	0.482051	0.894264	0.00760953	0.794457	4252	150	0.611729	0.415716	0.900163	0.0126428	0.618322	4228	124	0.618
VWC2	seq.15308.108	1.2101	1.0375	1.4114	0.015145	0.904352	4567	172	1.20672	1.0205	1.42693	0.0279983	0.949572	4542	145	1.24123	1.05412	1.46154	0.00953384	0.794457	4252	150	1.22428	1.0213	1.4676	0.0286813	0.711377	4228	124	0.711
SLTM	seq.8320.5	0.863276	0.693926	1.07395	0.186966	0.998072	4567	172	0.764086	0.601841	0.970069	0.0271373	0.949572	4542	145	0.774264	0.613749	0.976759	0.0308976	0.879255	4252	150	0.731031	0.551951	0.968212	0.0288648	0.711377	4228	124	0.711
GNPTG	seq.10666.7	1.15404	0.996679	1.33623	0.0554255	0.998072	4567	172	1.18943	1.02026	1.38665	0.0266768	0.949572	4542	145	1.15953	0.985534	1.36424	0.074368	0.967287	4252	150	1.21413	1.01728	1.44908	0.0315731	0.718781	4228	124	0.719
RAB39B	seq.12403.30	0.873626	0.732992	1.04124	0.131378	0.998072	4567	172	0.806388	0.666953	0.974973	0.0263058	0.949572	4542	145	0.869537	0.713599	1.05955	0.165638	0.998408	4252	150	0.795788	0.644687	0.982303	0.0334868	0.718877	4228	124	0.719
PDK2	seq.12651.21	0.87579	0.724349	1.05889	0.170922	0.998072	4567	172	0.766851	0.60632	0.969886	0.0267497	0.949572	4542	145	0.854508	0.705351	1.03521	0.108171	0.998408	4252	150	0.789118	0.62694	0.99325	0.0436227	0.755476	4228	124	0.755
PI3	seq.4982.54	1.15744	0.974222	1.37512	0.096319	0.998072	4567	172	1.22652	1.02251	1.47124	0.0278181	0.949572	4542	145	1.13524	0.942859	1.36687	0.180596	0.998408	4252	150	1.22575	1.00707	1.49193	0.0423316	0.755476	4228	124	0.755
HAVCR1	seq.9021.1	1.19809	1.04448	1.37428	0.0098312	0.839944	4567	172	1.18627	1.01954	1.38026	0.0270722	0.949572	4542	145	1.19567	1.02489	1.3949	0.0230438	0.857608	4252	150	1.18288	0.9932	1.40878	0.0596347	0.801124	4228	124	0.801
LMAN2	seq.9468.8	1.21185	1.00213	1.46546	0.047483	0.998072	4567	172	1.27559	1.02675	1.58475	0.0279212	0.949572	4542	145	1.18798	0.964679	1.46297	0.104911	0.998408	4252	150	1.2563	0.982167	1.60695	0.0692578	0.801124	4228	124	0.801
C1GALT1|C1GALT1C1	seq.21734.36	0.866214	0.730669	1.0269	0.0980809	0.998072	4567	172	0.811778	0.67458	0.976879	0.0272684	0.949572	4542	145	0.9152	0.751143	1.11509	0.379298	0.998408	4252	150	0.862146	0.688826	1.07908	0.195192	0.801968	4228	124	0.802
MYBPC1	seq.7648.9	1.18166	1.02456	1.36285	0.0218267	0.998072	4567	172	1.19343	1.01928	1.39733	0.0280003	0.949572	4542	145	1.12642	0.955266	1.32823	0.156855	0.998408	4252	150	1.14874	0.958331	1.37699	0.133694	0.801521	4228	124	0.802
GOLM1	seq.8983.7	0.820786	0.662599	1.01674	0.0706017	0.998072	4567	172	0.77611	0.619039	0.973034	0.0280244	0.949572	4542	145	0.850485	0.676355	1.06944	0.165874	0.998408	4252	150	0.817564	0.641562	1.04185	0.103412	0.801521	4228	124	0.802
MYOM2	seq.13534.20	1.18402	1.01783	1.37735	0.0285943	0.998072	4567	172	1.20346	1.01991	1.42004	0.0282739	0.953591	4542	145	1.14126	0.965701	1.34872	0.121031	0.998408	4252	150	1.16905	0.97641	1.3997	0.0891036	0.801521	4228	124	0.802
FGF7	seq.14031.18	0.855035	0.680632	1.07413	0.178432	0.998072	4567	172	0.761551	0.596371	0.972482	0.0289848	0.95545	4542	145	0.729816	0.575043	0.926246	0.00959674	0.794457	4252	150	0.677452	0.506346	0.906377	0.00874611	0.567129	4228	124	0.567
MRPL14	seq.8021.59	1.18154	1.04112	1.34089	0.00975807	0.839944	4567	172	1.17234	1.01672	1.35178	0.028657	0.95545	4542	145	1.19785	1.04502	1.37302	0.00953243	0.794457	4252	150	1.18593	1.02111	1.37737	0.0255116	0.701783	4228	124	0.702
YME1L1	seq.11190.129	0.875569	0.713282	1.07478	0.20391	0.998072	4567	172	0.770959	0.610438	0.97369	0.0289738	0.95545	4542	145	0.867786	0.688114	1.09437	0.230879	0.998408	4252	150	0.761069	0.586759	0.987163	0.0396518	0.747455	4228	124	0.747
SAT1	seq.9859.180	0.823333	0.662886	1.02261	0.078783	0.998072	4567	172	0.767552	0.605343	0.973226	0.0289582	0.95545	4542	145	0.757968	0.592233	0.970083	0.0277165	0.87466	4252	150	0.74984	0.566837	0.991925	0.0437167	0.755476	4228	124	0.755
AGT	seq.3484.60	1.2279	1.04424	1.44387	0.0130048	0.868193	4567	172	1.22164	1.02073	1.46211	0.0289753	0.95545	4542	145	1.13619	0.93396	1.38221	0.201675	0.998408	4252	150	1.17087	0.941176	1.45662	0.156817	0.801968	4228	124	0.802
CLPP	seq.17196.5	1.13029	0.990876	1.28932	0.0682228	0.998072	4567	172	1.16547	1.01544	1.33767	0.0294153	0.960534	4542	145	1.09857	0.95076	1.26935	0.202273	0.998408	4252	150	1.15947	0.998578	1.34628	0.0522188	0.788633	4228	124	0.789
CD209	seq.22576.1	0.835218	0.707102	0.986548	0.0340554	0.998072	4567	172	0.808875	0.668217	0.979141	0.0295346	0.960534	4542	145	0.864243	0.725881	1.02898	0.101196	0.998408	4252	150	0.844259	0.686478	1.03831	0.108741	0.801521	4228	124	0.802
CBR3	seq.14091.42	1.11403	0.931155	1.33283	0.237863	0.998072	4567	172	1.23744	1.02157	1.49892	0.0293951	0.960534	4542	145	1.03083	0.842592	1.26112	0.767887	0.998408	4252	150	1.14318	0.921694	1.41789	0.223275	0.803368	4228	124	0.803
RNF13	seq.8087.250	0.897807	0.722132	1.11622	0.331876	0.998072	4567	172	0.772428	0.611778	0.975264	0.029966	0.970232	4542	145	0.756378	0.609352	0.938879	0.0113445	0.85496	4252	150	0.684296	0.525085	0.891781	0.00499011	0.484706	4228	124	0.485
GPX3	seq.21796.43	0.903511	0.747548	1.09201	0.293931	0.998072	4567	172	0.801443	0.656118	0.978955	0.030131	0.971259	4542	145	0.880219	0.70177	1.10404	0.26971	0.998408	4252	150	0.762026	0.603475	0.962232	0.0224024	0.701783	4228	124	0.702
CTSK	seq.9443.137	1.1711	1.02495	1.33808	0.0202131	0.998072	4567	172	1.17073	1.01508	1.35026	0.0303444	0.972312	4542	145	1.18221	1.02311	1.36605	0.0232205	0.857608	4252	150	1.2059	1.03771	1.40135	0.0145658	0.629808	4228	124	0.63
TLNRD1	seq.21172.11	0.834389	0.692591	1.00522	0.0567509	0.998072	4567	172	0.805917	0.662875	0.979826	0.0304306	0.972312	4542	145	0.866694	0.713991	1.05206	0.14795	0.998408	4252	150	0.82431	0.660335	1.029	0.0877572	0.801521	4228	124	0.802
OAS1	seq.10361.25	1.13995	1.01027	1.28627	0.0335136	0.998072	4567	172	1.14417	1.01253	1.29292	0.0308025	0.975636	4542	145	1.10438	0.968288	1.2596	0.138951	0.998408	4252	150	1.14391	1.00293	1.3047	0.0451179	0.760992	4228	124	0.761
PRSS3	seq.3479.71	1.16787	1.0082	1.35282	0.0385541	0.998072	4567	172	1.19821	1.01693	1.4118	0.0307248	0.975636	4542	145	1.15429	0.985428	1.35209	0.0753882	0.967287	4252	150	1.17154	0.980234	1.40018	0.0817679	0.801521	4228	124	0.802
PRSS8	seq.6225.3	0.85642	0.742274	0.988119	0.0336893	0.998072	4567	172	0.846662	0.727757	0.984994	0.0310973	0.978514	4542	145	0.823768	0.696346	0.974508	0.0237475	0.857608	4252	150	0.80717	0.676791	0.962665	0.0171568	0.693946	4228	124	0.694
ERP29	seq.4983.6	1.13181	0.916557	1.39762	0.249963	0.998072	4567	172	1.28313	1.02281	1.60969	0.031162	0.978514	4542	145	1.14137	0.901759	1.44466	0.271383	0.998408	4252	150	1.30564	1.0081	1.69099	0.0432616	0.755476	4228	124	0.755
WFDC10B	seq.10695.12	0.802395	0.649157	0.991806	0.041741	0.998072	4567	172	0.771569	0.609004	0.97753	0.0316927	0.983801	4542	145	0.802696	0.661313	0.974305	0.0261933	0.865511	4252	150	0.758431	0.612515	0.939107	0.0112038	0.567129	4228	124	0.567
HERPUD2	seq.9779.63	0.820712	0.687308	0.98001	0.0290278	0.998072	4567	172	0.798552	0.650088	0.980923	0.0320699	0.983801	4542	145	0.781247	0.641552	0.95136	0.0140458	0.85496	4252	150	0.769221	0.611875	0.967028	0.0246301	0.701783	4228	124	0.702
DLL1	seq.8264.43	1.18061	1.01028	1.37964	0.0367357	0.998072	4567	172	1.20362	1.01556	1.4265	0.0325102	0.983801	4542	145	1.19194	1.01005	1.40659	0.0376791	0.92329	4252	150	1.22154	1.01682	1.46749	0.0324994	0.718877	4228	124	0.719
CHEK1	seq.2853.68	1.19342	1.03892	1.37091	0.0124275	0.8541	4567	172	1.18373	1.01412	1.38171	0.0325458	0.983801	4542	145	1.21071	1.04689	1.40016	0.0099445	0.804952	4252	150	1.19333	1.01086	1.40873	0.0368371	0.743374	4228	124	0.743
CKB|CKM	seq.3714.49	1.14556	0.981139	1.33754	0.0855922	0.998072	4567	172	1.1886	1.01522	1.39159	0.0317316	0.983801	4542	145	1.12323	0.952474	1.32459	0.167205	0.998408	4252	150	1.18655	1.00443	1.40169	0.0442164	0.757921	4228	124	0.758
LINGO1	seq.6620.82	0.932001	0.759061	1.14434	0.501286	0.998072	4567	172	0.77547	0.614859	0.978034	0.0317468	0.983801	4542	145	0.946112	0.756233	1.18367	0.627903	0.998408	4252	150	0.763174	0.583077	0.9989	0.0490661	0.78089	4228	124	0.781
CD38	seq.11513.92	0.875801	0.75341	1.01807	0.0842119	0.998072	4567	172	0.828345	0.697062	0.984355	0.0324267	0.983801	4542	145	0.907183	0.774646	1.0624	0.226711	0.998408	4252	150	0.850957	0.708217	1.02247	0.0849184	0.801521	4228	124	0.802
MGAT3	seq.21771.47	0.820637	0.691128	0.974414	0.0240849	0.998072	4567	172	0.814855	0.675642	0.982752	0.0321922	0.983801	4542	145	0.835418	0.696425	1.00215	0.0527629	0.926196	4252	150	0.85131	0.695291	1.04234	0.119106	0.801521	4228	124	0.802
NRXN1	seq.8971.9	0.854095	0.727786	1.00233	0.0534146	0.998072	4567	172	0.822231	0.687438	0.983455	0.0321426	0.983801	4542	145	0.88178	0.7387	1.05257	0.163687	0.998408	4252	150	0.855764	0.701555	1.04387	0.124423	0.801521	4228	124	0.802
TMEM106B	seq.8687.26	0.804337	0.613088	1.05525	0.115993	0.998072	4567	172	0.677359	0.472934	0.970147	0.033557	0.985736	4542	145	0.662745	0.49358	0.889887	0.00622146	0.794457	4252	150	0.570761	0.396551	0.821505	0.00254257	0.385949	4228	124	0.386
IL1R2	seq.14133.93	0.890825	0.752042	1.05522	0.180914	0.998072	4567	172	0.821112	0.685122	0.984094	0.0328787	0.985736	4542	145	0.812521	0.677912	0.973859	0.0246625	0.857608	4252	150	0.744489	0.613604	0.903292	0.00278023	0.397137	4228	124	0.397
FGF5	seq.3065.65	0.712643	0.565625	0.897873	0.00405493	0.68698	4567	172	0.779513	0.619733	0.980488	0.0333058	0.985736	4542	145	0.638234	0.490176	0.831012	0.000854134	0.538485	4252	150	0.697725	0.531463	0.916	0.00954779	0.567129	4228	124	0.538
LCN2	seq.2836.68	1.09939	0.949332	1.27317	0.205676	0.998072	4567	172	1.16808	1.01219	1.34797	0.0335165	0.985736	4542	145	1.09363	0.936089	1.27769	0.259405	0.998408	4252	150	1.16629	1.00218	1.35728	0.0468023	0.76965	4228	124	0.77
PSTPIP1	seq.19168.71	0.770291	0.622996	0.952411	0.0159395	0.912791	4567	172	0.796023	0.645091	0.982268	0.0334371	0.985736	4542	145	0.766034	0.614871	0.954358	0.0174752	0.857608	4252	150	0.803048	0.644907	0.999967	0.0499612	0.786107	4228	124	0.786
CUBN	seq.12904.180	0.859712	0.706632	1.04596	0.130816	0.998072	4567	172	0.779749	0.619958	0.980726	0.033475	0.985736	4542	145	0.867883	0.701775	1.07331	0.19111	0.998408	4252	150	0.780057	0.607082	1.00232	0.05215	0.788633	4228	124	0.789
TRIM62	seq.23225.26	1.14825	0.995533	1.32439	0.0576292	0.998072	4567	172	1.18113	1.0134	1.37662	0.0331414	0.985736	4542	145	1.14768	0.978837	1.34564	0.089784	0.988031	4252	150	1.17875	0.992376	1.40014	0.0610902	0.801124	4228	124	0.801
RIC3	seq.11228.37	0.941136	0.809125	1.09469	0.431417	0.998072	4567	172	0.83675	0.709164	0.987289	0.0347247	0.993423	4542	145	0.882357	0.760118	1.02425	0.0999673	0.998408	4252	150	0.787883	0.65633	0.945805	0.0105339	0.567129	4228	124	0.567
CACNB4	seq.11130.158	1.19138	1.03507	1.3713	0.0146733	0.883429	4567	172	1.17864	1.0116	1.37327	0.0350438	0.993423	4542	145	1.18543	1.01961	1.37822	0.0269267	0.867968	4252	150	1.20635	1.03123	1.41121	0.0190649	0.701783	4228	124	0.702
CCL7	seq.22969.12	0.824858	0.681801	0.997932	0.0475578	0.998072	4567	172	0.77638	0.613657	0.982251	0.0349247	0.993423	4542	145	0.771665	0.615966	0.966722	0.0241739	0.857608	4252	150	0.734076	0.557523	0.96654	0.0276326	0.701925	4228	124	0.702
CRP	seq.4337.49	1.24041	1.04864	1.46725	0.0119257	0.848172	4567	172	1.21289	1.01363	1.45132	0.0350459	0.993423	4542	145	1.32597	1.07741	1.63187	0.0077219	0.794457	4252	150	1.27776	1.01739	1.60475	0.0350025	0.724412	4228	124	0.724
IL5	seq.11071.1	1.13338	1.00253	1.28131	0.0454626	0.998072	4567	172	1.15227	1.0104	1.31405	0.0344846	0.993423	4542	145	1.12811	0.990135	1.28531	0.0701328	0.951571	4252	150	1.14112	0.990518	1.31462	0.0675403	0.801124	4228	124	0.801
DYNC1LI1	seq.24981.8	0.744471	0.590313	0.938888	0.0126779	0.863162	4567	172	0.787219	0.63057	0.982783	0.0345656	0.993423	4542	145	0.764491	0.606891	0.963019	0.0226126	0.857608	4252	150	0.809887	0.650976	1.00759	0.0584705	0.801124	4228	124	0.801
CLSTN1	seq.15521.4	0.840832	0.700402	1.00942	0.0629623	0.998072	4567	172	0.79016	0.634773	0.983586	0.0350186	0.993423	4542	145	0.916429	0.762935	1.1008	0.350764	0.998408	4252	150	0.859697	0.685144	1.07872	0.191695	0.801968	4228	124	0.802
SCN3B	seq.20516.11	1.20674	1.05247	1.38363	0.00708706	0.832729	4567	172	1.18363	1.01211	1.38422	0.0347997	0.993423	4542	145	1.19627	1.00721	1.42082	0.0411655	0.92329	4252	150	1.17243	0.956645	1.43688	0.125301	0.801521	4228	124	0.802
YES1	seq.2878.66	0.897445	0.76541	1.05226	0.182648	0.998072	4567	172	0.836684	0.709314	0.986926	0.0343285	0.993423	4542	145	0.939807	0.795976	1.10963	0.463844	0.998408	4252	150	0.865943	0.722488	1.03788	0.119324	0.801521	4228	124	0.802
DUSP3	seq.3480.7	1.14345	0.897469	1.45686	0.278059	0.998072	4567	172	1.26034	1.00979	1.57304	0.0407381	0.999831	4542	145	1.25439	1.02129	1.5407	0.0307071	0.879255	4252	150	1.37193	1.14085	1.64981	0.000778422	0.314496	4228	124	0.314
NIT2	seq.17808.37	1.10021	0.815795	1.48379	0.531418	0.998072	4567	172	1.26257	0.931806	1.71076	0.132505	0.999831	4542	145	1.28687	0.970647	1.7061	0.0796132	0.980121	4252	150	1.5019	1.16314	1.93933	0.00181597	0.351098	4228	124	0.351
RTN4IP1	seq.18180.58	1.16401	0.941106	1.4397	0.161418	0.998072	4567	172	1.22095	0.993873	1.4999	0.0572419	0.999831	4542	145	1.26615	1.04268	1.53752	0.0172268	0.857608	4252	150	1.35264	1.12493	1.62645	0.00131938	0.351098	4228	124	0.351
TXNDC12	seq.19334.62	1.19293	0.821745	1.73179	0.353588	0.998072	4567	172	1.39646	0.977651	1.99467	0.0663946	0.999831	4542	145	1.36434	0.975402	1.90838	0.0695953	0.951571	4252	150	1.60332	1.19989	2.14239	0.00141169	0.351098	4228	124	0.351
RARRES2	seq.3079.62	1.11735	0.952145	1.31122	0.174058	0.998072	4567	172	1.19862	1.0104	1.42189	0.0376425	0.999831	4542	145	1.20378	1.01259	1.43108	0.0355761	0.903038	4252	150	1.33534	1.11368	1.60112	0.00179217	0.351098	4228	124	0.351
LRP1	seq.8601.167	0.870323	0.705018	1.07439	0.196228	0.998072	4567	172	0.84487	0.668271	1.06814	0.158827	0.999831	4542	145	0.688808	0.547986	0.865819	0.00139967	0.599799	4252	150	0.690272	0.538813	0.884306	0.00335893	0.453144	4228	124	0.453
C2CD2L	seq.23704.11	1.26171	0.991852	1.60499	0.0583089	0.998072	4567	172	1.2784	0.989856	1.65107	0.0598525	0.999831	4542	145	1.37347	1.0981	1.7179	0.00544036	0.768868	4252	150	1.40594	1.1154	1.77217	0.00391848	0.483752	4228	124	0.484
NOTCH2	seq.11297.54	0.945986	0.808981	1.10619	0.486657	0.998072	4567	172	0.874108	0.724577	1.0545	0.159831	0.999831	4542	145	0.829445	0.691454	0.994975	0.0439821	0.92329	4252	150	0.740168	0.600797	0.911871	0.00470216	0.484706	4228	124	0.485
SOCS7	seq.11657.86	0.842162	0.70675	1.00352	0.0547666	0.998072	4567	172	0.798672	0.646023	0.98739	0.0377773	0.999831	4542	145	0.758777	0.617418	0.932501	0.00868002	0.794457	4252	150	0.687057	0.529039	0.892274	0.00488094	0.484706	4228	124	0.485
SMURF2	seq.13985.12	0.911003	0.768679	1.07968	0.282176	0.998072	4567	172	0.848615	0.707269	1.01821	0.0774151	0.999831	4542	145	0.765359	0.628598	0.931874	0.00775578	0.794457	4252	150	0.703029	0.550749	0.897413	0.00466873	0.484706	4228	124	0.485
PDLIM5	seq.23703.8	1.16089	0.877278	1.53618	0.296553	0.998072	4567	172	1.37035	1.0204	1.84032	0.0362403	0.999831	4542	145	1.24759	0.931611	1.67074	0.137654	0.998408	4252	150	1.51567	1.13444	2.02502	0.00490314	0.484706	4228	124	0.485
DEFA3	seq.20539.4	1.16791	0.974186	1.40016	0.09347	0.998072	4567	172	1.21069	0.99856	1.46789	0.0517346	0.999831	4542	145	1.27331	1.04187	1.55617	0.0182374	0.857608	4252	150	1.3548	1.0953	1.67579	0.0051253	0.491287	4228	124	0.491
COA4	seq.20457.13	1.0747	0.928519	1.24389	0.334165	0.998072	4567	172	1.13673	0.993211	1.30098	0.0627331	0.999831	4542	145	1.14198	0.993421	1.31275	0.0618782	0.939462	4252	150	1.2018	1.05616	1.36754	0.00528831	0.49238	4228	124	0.492
BCAT2	seq.19365.11	1.16871	0.877144	1.5572	0.286991	0.998072	4567	172	1.28181	0.966926	1.69924	0.0843182	0.999831	4542	145	1.33494	1.00818	1.7676	0.0437051	0.92329	4252	150	1.46019	1.11702	1.90879	0.00561219	0.498595	4228	124	0.499
DSG3	seq.11310.8	0.90376	0.742105	1.10063	0.314221	0.998072	4567	172	0.869469	0.68225	1.10806	0.25823	0.999831	4542	145	0.757981	0.616242	0.932321	0.00870351	0.794457	4252	150	0.693273	0.532655	0.902323	0.00644198	0.527302	4228	124	0.527
FXYD2	seq.25209.15	1.106	0.946615	1.29221	0.204453	0.998072	4567	172	1.16768	0.996794	1.36787	0.0548292	0.999831	4542	145	1.1837	1.00527	1.39378	0.0430617	0.92329	4252	150	1.26083	1.06634	1.49081	0.00670084	0.533293	4228	124	0.533
SNRPF	seq.5494.52	1.1124	0.95881	1.29059	0.159979	0.998072	4567	172	1.1382	0.979529	1.32257	0.091033	0.999831	4542	145	1.18188	1.02188	1.36693	0.0243481	0.857608	4252	150	1.2152	1.05545	1.39912	0.00671886	0.533293	4228	124	0.533
CGA	seq.14056.4	0.935926	0.77383	1.13198	0.494962	0.998072	4567	172	0.88023	0.70828	1.09392	0.249961	0.999831	4542	145	0.743085	0.598357	0.92282	0.00721519	0.794457	4252	150	0.687999	0.522905	0.905218	0.00755546	0.557725	4228	124	0.558
MYO6	seq.9894.13	1.17858	0.896285	1.54978	0.239523	0.998072	4567	172	1.2715	0.9535	1.69555	0.101895	0.999831	4542	145	1.32069	1.01258	1.72255	0.0401492	0.92329	4252	150	1.44019	1.10241	1.88148	0.00747442	0.557725	4228	124	0.558
SERPINH1	seq.10800.15	1.17535	0.913346	1.51251	0.209263	0.998072	4567	172	1.32092	1.01528	1.71856	0.0381751	0.999831	4542	145	1.26577	0.96953	1.65253	0.0831796	0.983043	4252	150	1.43751	1.09816	1.88173	0.00825252	0.567129	4228	124	0.567
SPATA20	seq.11117.2	0.892308	0.739107	1.07726	0.235782	0.998072	4567	172	0.804935	0.645164	1.00427	0.0545757	0.999831	4542	145	0.840014	0.709414	0.994656	0.0431603	0.92329	4252	150	0.773866	0.640041	0.935672	0.00813585	0.567129	4228	124	0.567
KRT5	seq.11177.16	0.830963	0.691589	0.998424	0.0480604	0.998072	4567	172	0.826765	0.675912	1.01129	0.0641953	0.999831	4542	145	0.745795	0.603329	0.921901	0.00669101	0.794457	4252	150	0.736187	0.581133	0.932612	0.0111432	0.567129	4228	124	0.567
ATF6	seq.11277.23	0.910836	0.756861	1.09614	0.32292	0.998072	4567	172	0.805383	0.657672	0.986269	0.0362827	0.999831	4542	145	0.86118	0.701786	1.05678	0.152381	0.998408	4252	150	0.742596	0.593944	0.928453	0.00901725	0.567129	4228	124	0.567
KRT72	seq.11566.48	0.91404	0.770213	1.08472	0.303496	0.998072	4567	172	0.813392	0.669442	0.988297	0.0376663	0.999831	4542	145	0.84291	0.679334	1.04587	0.120537	0.998408	4252	150	0.727442	0.568705	0.930485	0.0112881	0.567129	4228	124	0.567
TLN2	seq.14082.56	1.09152	0.887865	1.34188	0.405897	0.998072	4567	172	1.17565	0.959191	1.44095	0.119074	0.999831	4542	145	1.16564	0.959112	1.41663	0.123457	0.998408	4252	150	1.28446	1.0658	1.54798	0.00855628	0.567129	4228	124	0.567
NME4	seq.16809.1	1.04747	0.851462	1.28859	0.660864	0.998072	4567	172	1.14579	0.941051	1.39508	0.175399	0.999831	4542	145	1.19314	0.953641	1.4928	0.122403	0.998408	4252	150	1.32485	1.06666	1.64553	0.0109748	0.567129	4228	124	0.567
PIK3IP1	seq.20553.2	0.905683	0.755659	1.08549	0.283648	0.998072	4567	172	0.814788	0.672303	0.987471	0.0367475	0.999831	4542	145	0.871732	0.715967	1.06138	0.17168	0.998408	4252	150	0.749377	0.601914	0.932968	0.00986241	0.567129	4228	124	0.567
POU6F1	seq.21194.39	0.875797	0.725033	1.05791	0.168846	0.998072	4567	172	0.833246	0.667653	1.03991	0.106567	0.999831	4542	145	0.759357	0.610281	0.944849	0.0135583	0.85496	4252	150	0.709701	0.544344	0.925289	0.0112852	0.567129	4228	124	0.567
FAM110A	seq.22371.46	1.09978	0.904741	1.33687	0.339613	0.998072	4567	172	1.17303	0.979084	1.40539	0.0834963	0.999831	4542	145	1.19923	0.989913	1.45281	0.0633953	0.940601	4252	150	1.27487	1.06544	1.52547	0.00799508	0.567129	4228	124	0.567
CTPS1	seq.23705.42	1.08695	0.801209	1.47459	0.592118	0.998072	4567	172	1.29609	0.958113	1.7533	0.0924863	0.999831	4542	145	1.2204	0.883601	1.68556	0.226703	0.998408	4252	150	1.48802	1.09629	2.01974	0.01078	0.567129	4228	124	0.567
ERBB2	seq.2616.23	0.869106	0.729203	1.03585	0.117194	0.998072	4567	172	0.854438	0.705261	1.03517	0.108068	0.999831	4542	145	0.808512	0.668928	0.977222	0.0279286	0.87466	4252	150	0.759224	0.613986	0.938817	0.0109967	0.567129	4228	124	0.567
MAP3K7|TAB1	seq.5259.2	1.13757	0.91822	1.40932	0.238252	0.998072	4567	172	1.21477	0.975503	1.51272	0.0821429	0.999831	4542	145	1.20579	0.9918	1.46595	0.0604643	0.931253	4252	150	1.29973	1.06361	1.58826	0.0103821	0.567129	4228	124	0.567
DEFB107A	seq.6399.52	0.892504	0.730627	1.09025	0.265371	0.998072	4567	172	0.820664	0.651486	1.03377	0.093349	0.999831	4542	145	0.805073	0.638041	1.01583	0.0676091	0.949223	4252	150	0.69897	0.532746	0.917058	0.00974001	0.567129	4228	124	0.567
GPNMB	seq.8240.207	0.922526	0.76976	1.10561	0.382637	0.998072	4567	172	0.858113	0.704627	1.04503	0.128034	0.999831	4542	145	0.843599	0.697363	1.0205	0.0799331	0.980121	4252	150	0.758971	0.617158	0.933369	0.00896431	0.567129	4228	124	0.567
PRPSAP1	seq.9478.69	1.14978	0.930021	1.42146	0.197175	0.998072	4567	172	1.2338	0.9975	1.52608	0.0527544	0.999831	4542	145	1.2081	0.976026	1.49535	0.0823812	0.982561	4252	150	1.31818	1.06654	1.6292	0.0105881	0.567129	4228	124	0.567
WNT7A	seq.4889.82	0.87783	0.752551	1.02396	0.0972038	0.998072	4567	172	0.794306	0.64045	0.985124	0.0360427	0.999831	4542	145	0.817282	0.675057	0.989473	0.0385935	0.92329	4252	150	0.702441	0.534127	0.923796	0.0114993	0.573785	4228	124	0.574
PCTP	seq.23318.60	1.04002	0.766007	1.41206	0.801413	0.998072	4567	172	1.17936	0.87983	1.58086	0.26978	0.999831	4542	145	1.21854	0.901125	1.64777	0.199214	0.998408	4252	150	1.42648	1.08202	1.88059	0.0117671	0.583151	4228	124	0.583
PCDHGA10	seq.6321.65	1.23059	1.07444	1.40942	0.00272485	0.583635	4567	172	1.16886	1.00286	1.36235	0.0458801	0.999831	4542	145	1.23837	1.07897	1.42132	0.00235646	0.715285	4252	150	1.16289	0.989263	1.36699	0.0673766	0.801124	4228	124	0.584
DNAJC11	seq.9783.75	0.851608	0.728602	0.995381	0.043574	0.998072	4567	172	0.843976	0.707634	1.00659	0.0591667	0.999831	4542	145	0.77637	0.649414	0.928144	0.00546078	0.768868	4252	150	0.768277	0.624382	0.945334	0.0127278	0.618322	4228	124	0.618
ARL3	seq.12571.14	1.05352	0.771139	1.4393	0.743295	0.998072	4567	172	1.23925	0.914229	1.67982	0.166916	0.999831	4542	145	1.12623	0.825856	1.53584	0.452608	0.998408	4252	150	1.42525	1.07578	1.88825	0.0135521	0.6253	4228	124	0.625
DDOST	seq.17161.1	1.04362	0.859025	1.26789	0.667251	0.998072	4567	172	1.09229	0.897544	1.3293	0.378257	0.999831	4542	145	1.18815	0.984376	1.43411	0.0725017	0.964377	4252	150	1.26543	1.04988	1.52525	0.013478	0.6253	4228	124	0.625
PGF	seq.3078.1	0.965528	0.818766	1.1386	0.676661	0.998072	4567	172	0.856896	0.682986	1.07509	0.182072	0.999831	4542	145	0.858338	0.707812	1.04088	0.120479	0.998408	4252	150	0.732614	0.572138	0.938099	0.0136415	0.6253	4228	124	0.625
NACA	seq.3854.24	1.0415	0.776553	1.39685	0.786008	0.998072	4567	172	1.19873	0.892617	1.60982	0.228246	0.999831	4542	145	1.21924	0.906867	1.63921	0.189304	0.998408	4252	150	1.43015	1.07779	1.89772	0.013174	0.6253	4228	124	0.625
DEFB110	seq.8340.9	0.863619	0.693386	1.07565	0.190539	0.998072	4567	172	0.827153	0.629375	1.08708	0.173478	0.999831	4542	145	0.718931	0.548455	0.942397	0.0168652	0.857608	4252	150	0.655556	0.469657	0.915037	0.0130699	0.6253	4228	124	0.625
EFS	seq.12572.236	1.10161	0.962834	1.26039	0.158926	0.998072	4567	172	1.14597	0.997328	1.31677	0.0545742	0.999831	4542	145	1.14238	0.987155	1.322	0.0740196	0.967287	4252	150	1.19985	1.03703	1.38823	0.0143352	0.629808	4228	124	0.63
SCP2	seq.25049.8	1.08922	0.808832	1.4668	0.573574	0.998072	4567	172	1.26342	0.922895	1.72959	0.144499	0.999831	4542	145	1.22459	0.897561	1.67078	0.20118	0.998408	4252	150	1.46854	1.07928	1.99818	0.0144625	0.629808	4228	124	0.63
PLAU	seq.4158.54	0.907394	0.764792	1.07658	0.265259	0.998072	4567	172	0.828255	0.682817	1.00467	0.0557878	0.999831	4542	145	0.870697	0.724431	1.04649	0.140033	0.998408	4252	150	0.773451	0.629787	0.949887	0.0142697	0.629808	4228	124	0.63
SCARF1	seq.5129.12	1.17597	0.902244	1.53274	0.230511	0.998072	4567	172	1.28448	0.976606	1.68941	0.0733446	0.999831	4542	145	1.26246	0.970114	1.6429	0.082878	0.983043	4252	150	1.39395	1.06774	1.81983	0.0146105	0.629808	4228	124	0.63
MYDGF	seq.9248.36	1.10051	0.970906	1.24742	0.134094	0.998072	4567	172	1.11839	0.981059	1.27494	0.0941481	0.999831	4542	145	1.14028	1.01729	1.27813	0.0241658	0.857608	4252	150	1.16054	1.03005	1.30756	0.0144268	0.629808	4228	124	0.63
LRRC3B	seq.18947.3	1.18832	1.05842	1.33418	0.00348709	0.633606	4567	172	1.15502	1.00678	1.32508	0.0397365	0.999831	4542	145	1.19199	1.04964	1.35364	0.006795	0.794457	4252	150	1.14927	0.98181	1.3453	0.0833579	0.801521	4228	124	0.634
CD300LF	seq.5623.11	1.1956	1.0606	1.34777	0.00347145	0.633606	4567	172	1.14582	0.989438	1.32692	0.0690376	0.999831	4542	145	1.18663	1.03854	1.35584	0.0118665	0.85496	4252	150	1.1472	0.971126	1.35519	0.106236	0.801521	4228	124	0.634
RBM3	seq.12747.89	1.13148	0.845421	1.51432	0.406134	0.998072	4567	172	1.32834	0.992622	1.77761	0.0561101	0.999831	4542	145	1.20916	0.888752	1.64507	0.226605	0.998408	4252	150	1.43298	1.07143	1.91653	0.0153053	0.655877	4228	124	0.656
LGALS4	seq.2982.82	1.13959	0.998453	1.30067	0.05274	0.998072	4567	172	1.14805	0.999097	1.31921	0.0515036	0.999831	4542	145	1.18076	1.03417	1.34812	0.0140166	0.85496	4252	150	1.19162	1.03361	1.37377	0.0157132	0.669418	4228	124	0.669
POLD4	seq.19159.9	0.961272	0.818034	1.12959	0.631378	0.998072	4567	172	0.805591	0.657297	0.987341	0.0372753	0.999831	4542	145	0.940485	0.768052	1.15163	0.552652	0.998408	4252	150	0.694351	0.516064	0.934231	0.0159813	0.671453	4228	124	0.671
IGFBP7	seq.3320.49	0.900073	0.736404	1.10012	0.303877	0.998072	4567	172	0.812775	0.658855	1.00265	0.0529586	0.999831	4542	145	0.860976	0.691841	1.07146	0.179773	0.998408	4252	150	0.757849	0.604459	0.950165	0.0162593	0.671453	4228	124	0.671
GFRAL	seq.6920.1	0.884951	0.742062	1.05536	0.173722	0.998072	4567	172	0.844518	0.70655	1.00943	0.0633232	0.999831	4542	145	0.799734	0.657732	0.972393	0.0250455	0.857608	4252	150	0.789293	0.651159	0.95673	0.0159238	0.671453	4228	124	0.671
ASIC4	seq.6951.26	0.868981	0.744943	1.01367	0.0739093	0.998072	4567	172	0.82761	0.690712	0.991641	0.0402685	0.999831	4542	145	0.830871	0.696331	0.991407	0.0398062	0.92329	4252	150	0.769058	0.620606	0.95302	0.0164061	0.671453	4228	124	0.671
IL22	seq.13742.66	1.2146	1.05698	1.39572	0.00611869	0.825456	4567	172	1.1519	0.986197	1.34543	0.0743276	0.999831	4542	145	1.25803	1.08763	1.45513	0.00199329	0.674666	4252	150	1.17699	1.00046	1.38468	0.0493559	0.783219	4228	124	0.675
ZFAND5	seq.18317.111	0.791957	0.654772	0.957886	0.0162461	0.912791	4567	172	0.836439	0.701936	0.996716	0.0458493	0.999831	4542	145	0.717095	0.581287	0.884632	0.00190723	0.674666	4252	150	0.796053	0.655715	0.966426	0.021159	0.701783	4228	124	0.675
FOXL2	seq.11375.49	0.887742	0.746751	1.05535	0.177192	0.998072	4567	172	0.822307	0.660393	1.02392	0.0803394	0.999831	4542	145	0.785003	0.635585	0.969546	0.0246341	0.857608	4252	150	0.714986	0.541719	0.943671	0.017813	0.693946	4228	124	0.694
ITPKC	seq.12507.16	0.974952	0.815086	1.16617	0.781304	0.998072	4567	172	0.927128	0.754107	1.13985	0.472783	0.999831	4542	145	0.850096	0.669689	1.0791	0.182056	0.998408	4252	150	0.759929	0.605671	0.953476	0.0177136	0.693946	4228	124	0.694
AKT2	seq.14685.17	1.13446	0.942533	1.36546	0.182166	0.998072	4567	172	1.18375	0.979321	1.43084	0.0811656	0.999831	4542	145	1.16889	0.98065	1.39327	0.0815262	0.980121	4252	150	1.24107	1.0382	1.48357	0.017708	0.693946	4228	124	0.694
SENP1	seq.21715.40	0.861678	0.723859	1.02574	0.094086	0.998072	4567	172	0.86385	0.722031	1.03352	0.109687	0.999831	4542	145	0.744626	0.59916	0.925408	0.00783617	0.794457	4252	150	0.76432	0.612035	0.954497	0.0177494	0.693946	4228	124	0.694
UBE2Q1	seq.21727.15	1.08921	0.876062	1.35423	0.441821	0.998072	4567	172	1.15929	0.926512	1.45056	0.196169	0.999831	4542	145	1.1773	0.951092	1.4573	0.133779	0.998408	4252	150	1.29771	1.04657	1.60912	0.0175606	0.693946	4228	124	0.694
GALNT10	seq.7003.4	0.942573	0.795905	1.11627	0.493109	0.998072	4567	172	0.891232	0.712885	1.1142	0.312116	0.999831	4542	145	0.800459	0.660022	0.970777	0.0237389	0.857608	4252	150	0.740695	0.578554	0.948275	0.0172492	0.693946	4228	124	0.694
EDDM3A	seq.9536.16	1.15356	0.979083	1.35914	0.0877547	0.998072	4567	172	1.12784	0.936664	1.35805	0.204247	0.999831	4542	145	1.25314	1.06739	1.47122	0.00583893	0.768868	4252	150	1.24624	1.03962	1.49393	0.0173074	0.693946	4228	124	0.694
PGRMC2	seq.10506.53	1.14114	0.992494	1.31206	0.0637122	0.998072	4567	172	1.16919	1.0042	1.36128	0.0440064	0.999831	4542	145	1.1581	1.0079	1.33068	0.0383553	0.92329	4252	150	1.19713	1.03037	1.39088	0.0187304	0.701783	4228	124	0.702
MGAT1	seq.10571.14	1.14416	1.003	1.30519	0.0450049	0.998072	4567	172	1.13914	0.991462	1.30881	0.0659218	0.999831	4542	145	1.21048	1.04949	1.39617	0.00870504	0.794457	4252	150	1.19094	1.0247	1.38415	0.0227216	0.701783	4228	124	0.702
TRIO	seq.11126.102	0.8326	0.708059	0.979046	0.0266795	0.998072	4567	172	0.842873	0.70649	1.00558	0.0576736	0.999831	4542	145	0.789778	0.657175	0.949138	0.0118475	0.85496	4252	150	0.790032	0.642332	0.971695	0.0256203	0.701783	4228	124	0.702
ANKRD27	seq.12445.50	1.15371	0.972614	1.36852	0.100744	0.998072	4567	172	1.12495	0.938276	1.34876	0.203447	0.999831	4542	145	1.2271	1.05259	1.43054	0.00892508	0.794457	4252	150	1.20247	1.02803	1.40652	0.0211266	0.701783	4228	124	0.702
NUP98	seq.12772.8	0.954024	0.782399	1.1633	0.641825	0.998072	4567	172	0.880549	0.731743	1.05962	0.178016	0.999831	4542	145	0.813624	0.623184	1.06226	0.12951	0.998408	4252	150	0.751802	0.589132	0.959388	0.021832	0.701783	4228	124	0.702
CNGA2	seq.12872.35	0.812486	0.652124	1.01228	0.0641445	0.998072	4567	172	0.741952	0.561411	0.980551	0.0359	0.999831	4542	145	0.724025	0.543258	0.964943	0.0275589	0.87466	4252	150	0.657937	0.463149	0.934648	0.0194218	0.701783	4228	124	0.702
RAB18	seq.12945.33	1.08604	0.906617	1.30097	0.370311	0.998072	4567	172	1.11513	0.912354	1.36296	0.287244	0.999831	4542	145	1.18345	0.991646	1.41235	0.0619	0.939462	4252	150	1.24284	1.02957	1.50028	0.0236102	0.701783	4228	124	0.702
PREP	seq.14273.19	1.07774	0.90029	1.29016	0.414707	0.998072	4567	172	1.1489	0.941144	1.40252	0.172585	0.999831	4542	145	1.18719	0.981638	1.43578	0.0769043	0.974344	4252	150	1.28107	1.03792	1.58118	0.0210791	0.701783	4228	124	0.702
DIDO1	seq.14329.4	0.791604	0.633721	0.98882	0.0394886	0.998072	4567	172	0.802633	0.630717	1.02141	0.0738137	0.999831	4542	145	0.72646	0.567226	0.930394	0.011357	0.85496	4252	150	0.704882	0.526656	0.943421	0.0186911	0.701783	4228	124	0.702
CRADD	seq.15322.35	1.10092	0.860409	1.40866	0.444567	0.998072	4567	172	1.16558	0.910156	1.49267	0.224727	0.999831	4542	145	1.25516	0.994928	1.58347	0.0552248	0.926196	4252	150	1.31605	1.04465	1.65797	0.0197674	0.701783	4228	124	0.702
ENO3	seq.16616.137	0.905659	0.761508	1.0771	0.262578	0.998072	4567	172	0.850244	0.703502	1.0276	0.0932729	0.999831	4542	145	0.864398	0.706435	1.05768	0.156972	0.998408	4252	150	0.783613	0.631751	0.97198	0.0265151	0.701783	4228	124	0.702
NPPB	seq.16751.15	0.929086	0.786001	1.09822	0.388683	0.998072	4567	172	0.829547	0.68936	0.998243	0.047859	0.999831	4542	145	0.856849	0.696177	1.0546	0.144782	0.998408	4252	150	0.74886	0.588282	0.95327	0.0188416	0.701783	4228	124	0.702
CNPY3	seq.17327.3	1.12205	0.955911	1.31707	0.158982	0.998072	4567	172	1.15731	0.966204	1.38621	0.112597	0.999831	4542	145	1.18302	1.01704	1.3761	0.0293316	0.879255	4252	150	1.20987	1.02232	1.43183	0.0266349	0.701783	4228	124	0.702
IVD	seq.17737.7	1.21431	0.895003	1.64755	0.212251	0.998072	4567	172	1.26522	0.915826	1.74791	0.15366	0.999831	4542	145	1.37145	0.990385	1.89913	0.0571938	0.926638	4252	150	1.47969	1.06308	2.05958	0.0202021	0.701783	4228	124	0.702
IRAK4	seq.18162.167	1.0911	0.880911	1.35145	0.424524	0.998072	4567	172	1.17405	0.980665	1.40556	0.0805721	0.999831	4542	145	1.1286	0.917938	1.38762	0.251091	0.998408	4252	150	1.21196	1.02109	1.43852	0.0278979	0.701925	4228	124	0.702
THG1L	seq.18215.5	1.11412	0.934372	1.32845	0.22866	0.998072	4567	172	1.15477	0.96627	1.38005	0.113502	0.999831	4542	145	1.20434	1.00204	1.4475	0.0475153	0.92329	4252	150	1.25316	1.03182	1.52198	0.0228511	0.701783	4228	124	0.702
ZNF34	seq.18265.18	0.933152	0.800271	1.0881	0.377368	0.998072	4567	172	0.878943	0.742375	1.04063	0.134214	0.999831	4542	145	0.87655	0.737258	1.04216	0.135621	0.998408	4252	150	0.81618	0.683795	0.974196	0.024479	0.701783	4228	124	0.702
HDAC2	seq.18897.31	1.06619	0.831124	1.36774	0.614005	0.998072	4567	172	1.24245	0.989901	1.55943	0.061145	0.999831	4542	145	1.11693	0.866406	1.43989	0.393458	0.998408	4252	150	1.30369	1.03409	1.64358	0.0248571	0.701783	4228	124	0.702
MECP2	seq.19108.50	0.875094	0.734646	1.04239	0.134956	0.998072	4567	172	0.83026	0.665362	1.03602	0.0996181	0.999831	4542	145	0.795306	0.637256	0.992556	0.0427545	0.92329	4252	150	0.725743	0.548086	0.960987	0.0252339	0.701783	4228	124	0.702
PARK7	seq.19523.215	1.12146	0.816384	1.54054	0.47917	0.998072	4567	172	1.33311	0.976078	1.82074	0.0706433	0.999831	4542	145	1.18818	0.843002	1.6747	0.324782	0.998408	4252	150	1.45006	1.04858	2.00526	0.02465	0.701783	4228	124	0.702
ATP5IF1	seq.19755.38	1.1265	0.91041	1.39388	0.272986	0.998072	4567	172	1.23437	0.994054	1.53278	0.0566481	0.999831	4542	145	1.1814	0.953455	1.46384	0.127459	0.998408	4252	150	1.29187	1.03534	1.61197	0.0233573	0.701783	4228	124	0.702
FAM3C	seq.20520.14	1.11799	0.987473	1.26576	0.0782432	0.998072	4567	172	1.12522	0.984662	1.28585	0.0831028	0.999831	4542	145	1.15652	1.02745	1.30182	0.016021	0.857608	4252	150	1.16615	1.02592	1.32555	0.0187	0.701783	4228	124	0.702
GTSF1	seq.20946.41	0.987578	0.864586	1.12807	0.853859	0.998072	4567	172	0.884166	0.735734	1.06254	0.189186	0.999831	4542	145	0.910974	0.77156	1.07558	0.271224	0.998408	4252	150	0.750694	0.583957	0.96504	0.025241	0.701783	4228	124	0.702
SDHAF1	seq.20996.107	0.909306	0.784656	1.05376	0.206263	0.998072	4567	172	0.849757	0.715743	1.00886	0.0629954	0.999831	4542	145	0.86929	0.736978	1.02536	0.0963593	0.998408	4252	150	0.791205	0.646011	0.969033	0.0235676	0.701783	4228	124	0.702
DESI1	seq.21204.70	0.858815	0.7173	1.02825	0.0975685	0.998072	4567	172	0.796585	0.630497	1.00642	0.0566085	0.999831	4542	145	0.82193	0.686429	0.984178	0.0328828	0.879506	4252	150	0.769967	0.611359	0.969722	0.0263337	0.701783	4228	124	0.702
HYOU1	seq.21497.32	1.20353	0.990072	1.463	0.0629095	0.998072	4567	172	1.22129	0.984786	1.51458	0.0686994	0.999831	4542	145	1.27554	1.03416	1.57327	0.022979	0.857608	4252	150	1.32247	1.04855	1.66795	0.0182562	0.701783	4228	124	0.702
BMF	seq.21528.12	0.86055	0.723437	1.02365	0.0898811	0.998072	4567	172	0.824818	0.667555	1.01913	0.0743531	0.999831	4542	145	0.782313	0.635336	0.963293	0.0207649	0.857608	4252	150	0.734444	0.566871	0.951553	0.0195002	0.701783	4228	124	0.702
ADGRD1	seq.21546.20	0.8911	0.727159	1.092	0.266344	0.998072	4567	172	0.830131	0.662178	1.04068	0.106474	0.999831	4542	145	0.816547	0.653429	1.02038	0.0746634	0.967287	4252	150	0.750069	0.586448	0.959341	0.0219862	0.701783	4228	124	0.702
CDH13	seq.21693.14	1.15286	0.992302	1.33939	0.0630262	0.998072	4567	172	1.16632	0.991078	1.37256	0.0640093	0.999831	4542	145	1.20852	1.01701	1.4361	0.0314292	0.879506	4252	150	1.24362	1.0299	1.5017	0.0234372	0.701783	4228	124	0.702
ST6GAL2	seq.21737.20	1.10044	0.92582	1.308	0.277615	0.998072	4567	172	1.12806	0.938098	1.3565	0.200261	0.999831	4542	145	1.17625	0.98185	1.40915	0.0781928	0.980121	4252	150	1.24902	1.03533	1.5068	0.0201947	0.701783	4228	124	0.702
MGAT5	seq.21813.171	0.874206	0.722209	1.05819	0.16772	0.998072	4567	172	0.816112	0.663726	1.00348	0.0539784	0.999831	4542	145	0.867606	0.699326	1.07638	0.196719	0.998408	4252	150	0.767098	0.606939	0.96952	0.026482	0.701783	4228	124	0.702
WAS	seq.22033.7	0.861629	0.738597	1.00515	0.0581454	0.998072	4567	172	0.838773	0.70818	0.993449	0.0417383	0.999831	4542	145	0.836506	0.69731	1.00349	0.0545428	0.926196	4252	150	0.793776	0.64707	0.973744	0.0267463	0.701783	4228	124	0.702
ZDHHC4	seq.22834.21	1.05272	0.797901	1.38893	0.716338	0.998072	4567	172	1.1491	0.879835	1.50078	0.307618	0.999831	4542	145	1.17941	0.916457	1.51782	0.199787	0.998408	4252	150	1.3105	1.0366	1.65677	0.0237898	0.701783	4228	124	0.702
NUDT11	seq.23623.48	1.10466	0.955869	1.2766	0.177496	0.998072	4567	172	1.11086	0.949275	1.29995	0.189886	0.999831	4542	145	1.20046	1.03188	1.39657	0.0179556	0.857608	4252	150	1.19736	1.01975	1.4059	0.0278988	0.701925	4228	124	0.702
EHD2	seq.23640.10	1.12918	0.93738	1.36023	0.200844	0.998072	4567	172	1.2129	1.00561	1.46293	0.043544	0.999831	4542	145	1.15039	0.954823	1.386	0.14056	0.998408	4252	150	1.24392	1.02392	1.51118	0.0279421	0.701925	4228	124	0.702
CTNNA1	seq.24426.15	1.09358	0.940677	1.27133	0.244368	0.998072	4567	172	1.13269	0.967204	1.32648	0.122062	0.999831	4542	145	1.12425	0.960364	1.31611	0.145142	0.998408	4252	150	1.20095	1.02185	1.41145	0.0262596	0.701783	4228	124	0.702
RILPL1	seq.24496.26	1.14288	0.891104	1.46579	0.292847	0.998072	4567	172	1.18416	0.921831	1.52115	0.185846	0.999831	4542	145	1.22307	0.959911	1.55836	0.103312	0.998408	4252	150	1.29998	1.03014	1.6405	0.0270961	0.701783	4228	124	0.702
NONO	seq.24910.18	1.18203	0.93073	1.50119	0.170267	0.998072	4567	172	1.24403	0.991793	1.56042	0.058929	0.999831	4542	145	1.23385	0.980232	1.55309	0.0734645	0.967287	4252	150	1.28677	1.03297	1.60294	0.0244894	0.701783	4228	124	0.702
MPP5	seq.24982.33	1.11439	0.975704	1.27279	0.110205	0.998072	4567	172	1.1195	0.970518	1.29136	0.121313	0.999831	4542	145	1.16881	1.02397	1.33414	0.020836	0.857608	4252	150	1.18088	1.0238	1.36206	0.0224326	0.701783	4228	124	0.702
CATIP	seq.25242.12	1.10171	0.931672	1.30278	0.257418	0.998072	4567	172	1.16573	0.982637	1.38293	0.0785654	0.999831	4542	145	1.13643	0.965043	1.33826	0.12518	0.998408	4252	150	1.21043	1.02428	1.43041	0.024991	0.701783	4228	124	0.702
LIMD1	seq.25280.2	1.01189	0.737396	1.38857	0.941633	0.998072	4567	172	1.14848	0.858225	1.53689	0.351653	0.999831	4542	145	1.17949	0.851786	1.63327	0.320205	0.998408	4252	150	1.3964	1.0472	1.86205	0.0229587	0.701783	4228	124	0.702
RABGAP1L	seq.25286.33	1.06329	0.766811	1.47441	0.712884	0.998072	4567	172	1.24503	0.907347	1.70839	0.174567	0.999831	4542	145	1.20617	0.864712	1.68246	0.269617	0.998408	4252	150	1.43389	1.05382	1.95104	0.0218121	0.701783	4228	124	0.702
MALT1	seq.25300.39	0.820501	0.66037	1.01946	0.0740988	0.998072	4567	172	0.78558	0.610107	1.01152	0.061319	0.999831	4542	145	0.768886	0.603016	0.980382	0.0340225	0.886748	4252	150	0.708228	0.527598	0.9507	0.0216443	0.701783	4228	124	0.702
APOB	seq.2797.56	0.883607	0.740658	1.05415	0.169337	0.998072	4567	172	0.830342	0.686071	1.00495	0.0562272	0.999831	4542	145	0.839567	0.689864	1.02176	0.0809508	0.980121	4252	150	0.766323	0.613516	0.957188	0.0189954	0.701783	4228	124	0.702
BCAN	seq.3461.58	1.17536	0.999122	1.38268	0.0512472	0.998072	4567	172	1.17151	0.980085	1.40033	0.0820331	0.999831	4542	145	1.23832	1.04301	1.47021	0.0146534	0.85496	4252	150	1.24317	1.03253	1.49679	0.021563	0.701783	4228	124	0.702
CAMK1	seq.3592.4	1.07311	0.885132	1.301	0.472682	0.998072	4567	172	1.18801	0.955597	1.47696	0.120881	0.999831	4542	145	1.15131	0.9368	1.41493	0.180444	0.998408	4252	150	1.28651	1.02892	1.60859	0.0270959	0.701783	4228	124	0.702
MAPKAPK2	seq.3820.68	1.07292	0.805826	1.42855	0.629869	0.998072	4567	172	1.20919	0.901544	1.62183	0.204769	0.999831	4542	145	1.19767	0.901914	1.59041	0.212559	0.998408	4252	150	1.3797	1.04682	1.81842	0.0223218	0.701783	4228	124	0.702
SGTA	seq.3868.8	0.988198	0.713273	1.36909	0.943102	0.998072	4567	172	1.17185	0.84085	1.63315	0.349052	0.999831	4542	145	1.1787	0.84367	1.64678	0.335225	0.998408	4252	150	1.43879	1.04927	1.9729	0.0239076	0.701783	4228	124	0.702
ADAM12	seq.4420.7	0.795022	0.665463	0.949805	0.0114902	0.848172	4567	172	0.82924	0.690297	0.99615	0.0453677	0.999831	4542	145	0.767064	0.627685	0.937393	0.00954421	0.794457	4252	150	0.784645	0.632709	0.973067	0.0271999	0.701783	4228	124	0.702
GCG	seq.4891.50	1.19217	1.01357	1.40225	0.0337751	0.998072	4567	172	1.18905	0.999162	1.41503	0.0511103	0.999831	4542	145	1.23861	1.04207	1.47223	0.0152051	0.85496	4252	150	1.24534	1.03686	1.49575	0.018916	0.701783	4228	124	0.702
IL20RA	seq.5085.18	0.942202	0.791875	1.12107	0.502008	0.998072	4567	172	0.903513	0.730967	1.11679	0.348033	0.999831	4542	145	0.826291	0.6772	1.00821	0.0601763	0.931253	4252	150	0.766573	0.609833	0.963599	0.022743	0.701783	4228	124	0.702
JAML	seq.5094.62	0.838037	0.695084	1.01039	0.0640703	0.998072	4567	172	0.806571	0.646072	1.00694	0.0575783	0.999831	4542	145	0.791616	0.64532	0.971079	0.0249929	0.857608	4252	150	0.763213	0.603259	0.965579	0.0243283	0.701783	4228	124	0.702
KIR3DS1	seq.5097.14	0.886257	0.755504	1.03964	0.138161	0.998072	4567	172	0.888397	0.747271	1.05618	0.180001	0.999831	4542	145	0.796125	0.661662	0.957913	0.0157115	0.85496	4252	150	0.797256	0.652035	0.974822	0.0272054	0.701783	4228	124	0.702
NDNF	seq.6604.59	0.980697	0.830633	1.15787	0.818065	0.998072	4567	172	0.906633	0.757951	1.08448	0.283474	0.999831	4542	145	0.891299	0.725845	1.09447	0.272029	0.998408	4252	150	0.795431	0.649063	0.974805	0.0273878	0.701925	4228	124	0.702
RLN2	seq.6621.10	1.08384	0.91729	1.28063	0.344248	0.998072	4567	172	1.1423	0.963817	1.35384	0.124822	0.999831	4542	145	1.12526	0.951867	1.33025	0.166897	0.998408	4252	150	1.20709	1.0223	1.42528	0.0264082	0.701783	4228	124	0.702
AMIGO2	seq.6914.15	0.917349	0.767759	1.09609	0.342194	0.998072	4567	172	0.844704	0.693676	1.02861	0.0930977	0.999831	4542	145	0.872861	0.720962	1.05676	0.16332	0.998408	4252	150	0.785044	0.632988	0.973626	0.0275714	0.701925	4228	124	0.702
TSR3	seq.7018.10	0.988639	0.831375	1.17565	0.897147	0.998072	4567	172	0.88016	0.71476	1.08383	0.229377	0.999831	4542	145	0.936261	0.790101	1.10946	0.446941	0.998408	4252	150	0.810994	0.674405	0.975248	0.02599	0.701783	4228	124	0.702
RMDN1	seq.7096.30	1.17037	0.925177	1.48055	0.189648	0.998072	4567	172	1.2471	0.97728	1.59142	0.0758584	0.999831	4542	145	1.22661	0.957562	1.57126	0.105932	0.998408	4252	150	1.33231	1.03829	1.70957	0.0241079	0.701783	4228	124	0.702
SEMG1	seq.7115.5	0.859018	0.729117	1.01206	0.0692683	0.998072	4567	172	0.866601	0.728842	1.0304	0.105024	0.999831	4542	145	0.823054	0.692876	0.97769	0.0266328	0.866159	4252	150	0.813676	0.679779	0.973946	0.0245893	0.701783	4228	124	0.702
JAG1	seq.7754.11	0.843133	0.700758	1.01443	0.0705862	0.998072	4567	172	0.822024	0.674532	1.00177	0.0520762	0.999831	4542	145	0.750777	0.595824	0.946029	0.0150811	0.85496	4252	150	0.750365	0.584889	0.962656	0.0238575	0.701783	4228	124	0.702
FGF3	seq.7894.155	0.899606	0.747211	1.08308	0.263903	0.998072	4567	172	0.855838	0.702378	1.04283	0.122572	0.999831	4542	145	0.821683	0.655177	1.0305	0.0891465	0.986413	4252	150	0.749153	0.586368	0.95713	0.0208588	0.701783	4228	124	0.702
HS3ST3A1	seq.8268.98	1.10804	0.924378	1.32819	0.267192	0.998072	4567	172	1.17135	0.971779	1.41192	0.0969925	0.999831	4542	145	1.15897	0.956467	1.40436	0.132133	0.998408	4252	150	1.24871	1.02687	1.51848	0.026033	0.701783	4228	124	0.702
CMPK1	seq.8312.139	1.04161	0.879766	1.23322	0.636107	0.998072	4567	172	1.13491	0.965879	1.33352	0.124032	0.999831	4542	145	1.09762	0.912024	1.32097	0.32435	0.998408	4252	150	1.2322	1.03335	1.46931	0.0200536	0.701783	4228	124	0.702
COX7A1	seq.8390.25	0.946037	0.816173	1.09656	0.461504	0.998072	4567	172	0.879781	0.739343	1.04689	0.148877	0.999831	4542	145	0.839103	0.686625	1.02544	0.0864452	0.983043	4252	150	0.749259	0.586763	0.956756	0.0206442	0.701783	4228	124	0.702
ITIH2	seq.9326.33	0.898716	0.77198	1.04626	0.168534	0.998072	4567	172	0.907873	0.777064	1.0607	0.223375	0.999831	4542	145	0.836657	0.7101	0.985769	0.0330655	0.879506	4252	150	0.822972	0.693906	0.976044	0.0251819	0.701783	4228	124	0.702
TIGIT	seq.9638.2	1.15095	1.01568	1.30424	0.0275333	0.998072	4567	172	1.15231	1.00547	1.32059	0.0415056	0.999831	4542	145	1.15822	1.01576	1.32065	0.0282717	0.87466	4252	150	1.17719	1.01969	1.35902	0.0260061	0.701783	4228	124	0.702
RSPO3	seq.13094.75	0.830865	0.697662	0.989499	0.0376714	0.998072	4567	172	0.830975	0.687008	1.00511	0.056459	0.999831	4542	145	0.763847	0.611827	0.95364	0.0173478	0.857608	4252	150	0.759374	0.59334	0.971869	0.0287659	0.711377	4228	124	0.711
NCOA7	seq.25299.11	1.07037	0.823288	1.39162	0.611536	0.998072	4567	172	1.16945	0.899491	1.52042	0.242422	0.999831	4542	145	1.17198	0.935448	1.46833	0.167645	0.998408	4252	150	1.2804	1.02643	1.59723	0.0284358	0.711377	4228	124	0.711
OTOR	seq.15432.1	0.856368	0.707907	1.03596	0.11043	0.998072	4567	172	0.784836	0.611612	1.00712	0.05688	0.999831	4542	145	0.819368	0.665912	1.00819	0.0597087	0.929439	4252	150	0.745444	0.572279	0.971007	0.0293953	0.711807	4228	124	0.712
PNOC	seq.15434.5	0.932863	0.786283	1.10677	0.425545	0.998072	4567	172	0.802643	0.64842	0.993548	0.0434397	0.999831	4542	145	0.940578	0.787847	1.12292	0.498007	0.998408	4252	150	0.792034	0.641635	0.977687	0.030005	0.711807	4228	124	0.712
ACADM	seq.17333.20	1.11514	0.858586	1.44835	0.413938	0.998072	4567	172	1.1764	0.884484	1.56465	0.264236	0.999831	4542	145	1.24212	0.936414	1.64762	0.132527	0.998408	4252	150	1.38731	1.03174	1.86541	0.0302488	0.711807	4228	124	0.712
MDP1	seq.20923.10	0.99905	0.715952	1.39409	0.99554	0.999036	4567	172	1.18297	0.834085	1.67778	0.345968	0.999831	4542	145	1.15732	0.820277	1.63285	0.405445	0.998408	4252	150	1.43686	1.03523	1.9943	0.0302344	0.711807	4228	124	0.712
POLR2C	seq.20995.47	1.15076	1.01499	1.30469	0.0283563	0.998072	4567	172	1.15146	1.00616	1.31774	0.0404373	0.999831	4542	145	1.18532	1.03749	1.35422	0.012368	0.85496	4252	150	1.17772	1.01657	1.36443	0.0293396	0.711807	4228	124	0.712
TERB2	seq.22801.83	0.89385	0.749948	1.06536	0.210199	0.998072	4567	172	0.82773	0.657112	1.04265	0.108412	0.999831	4542	145	0.853772	0.705451	1.03328	0.104427	0.998408	4252	150	0.751211	0.579962	0.973024	0.0302223	0.711807	4228	124	0.712
ART5	seq.23202.78	1.11098	0.966891	1.27654	0.137562	0.998072	4567	172	1.13483	0.971401	1.32576	0.110874	0.999831	4542	145	1.15238	1.00649	1.31942	0.0400005	0.92329	4252	150	1.18542	1.01692	1.38184	0.029671	0.711807	4228	124	0.712
SSNA1	seq.23242.2	0.871824	0.689558	1.10227	0.251672	0.998072	4567	172	0.810983	0.644049	1.02119	0.0747952	0.999831	4542	145	0.775524	0.599853	1.00264	0.0523947	0.926196	4252	150	0.760125	0.593087	0.974206	0.0302798	0.711807	4228	124	0.712
EFCAB1	seq.23274.27	1.1476	0.950849	1.38507	0.151354	0.998072	4567	172	1.15788	0.936641	1.43136	0.175428	0.999831	4542	145	1.2118	1.00211	1.46536	0.0475044	0.92329	4252	150	1.25615	1.02231	1.54347	0.0300103	0.711807	4228	124	0.712
POGLUT2	seq.6611.8	1.21627	1.01794	1.45324	0.0311021	0.998072	4567	172	1.17288	0.958633	1.435	0.121267	0.999831	4542	145	1.27237	1.06695	1.51734	0.00733161	0.794457	4252	150	1.2419	1.0206	1.5112	0.0304929	0.71199	4228	124	0.712
UXS1	seq.8258.22	1.08341	0.917798	1.27892	0.343859	0.998072	4567	172	1.13301	0.95452	1.34487	0.153352	0.999831	4542	145	1.13618	0.95424	1.35282	0.151592	0.998408	4252	150	1.22115	1.01911	1.46323	0.0303756	0.711807	4228	124	0.712
RETREG1	seq.8556.5	0.870367	0.726388	1.04288	0.132358	0.998072	4567	172	0.801942	0.637188	1.0093	0.059953	0.999831	4542	145	0.844759	0.696617	1.02441	0.0863642	0.983043	4252	150	0.749643	0.578071	0.972139	0.0297734	0.711807	4228	124	0.712
LST1	seq.9531.24	1.11104	0.821716	1.50223	0.493877	0.998072	4567	172	1.25856	0.963272	1.64437	0.0918517	0.999831	4542	145	1.17476	0.866433	1.59282	0.299751	0.998408	4252	150	1.33182	1.02972	1.72255	0.0290235	0.711807	4228	124	0.712
APRT	seq.10088.37	1.09308	0.800803	1.49204	0.575035	0.998072	4567	172	1.25869	0.90832	1.74422	0.166884	0.999831	4542	145	1.21799	0.876093	1.69331	0.24076	0.998408	4252	150	1.43556	1.03386	1.99335	0.030863	0.715235	4228	124	0.715
PRNP	seq.6545.58	0.929417	0.786938	1.09769	0.388605	0.998072	4567	172	0.883242	0.736779	1.05882	0.179546	0.999831	4542	145	0.86631	0.724294	1.03617	0.116178	0.998408	4252	150	0.809177	0.667537	0.980869	0.0310246	0.715235	4228	124	0.715
EMID1	seq.9547.29	0.847621	0.719664	0.998329	0.0477006	0.998072	4567	172	0.829379	0.67964	1.01211	0.0655431	0.999831	4542	145	0.796721	0.662235	0.95852	0.015991	0.857608	4252	150	0.782459	0.626147	0.977793	0.0309659	0.715235	4228	124	0.715
SEPTIN11	seq.12620.3	1.16104	0.935674	1.44069	0.175055	0.998072	4567	172	1.23276	0.983552	1.54512	0.0693602	0.999831	4542	145	1.18138	0.965225	1.44594	0.105943	0.998408	4252	150	1.26007	1.0209	1.55527	0.0313456	0.718091	4228	124	0.718
LRP2BP	seq.21181.10	1.12934	0.964742	1.32202	0.13018	0.998072	4567	172	1.10052	0.931352	1.30042	0.260658	0.999831	4542	145	1.23198	1.03433	1.4674	0.0193694	0.857608	4252	150	1.22427	1.0183	1.4719	0.0313254	0.718091	4228	124	0.718
ZNF410	seq.12843.6	0.931686	0.811225	1.07003	0.316477	0.998072	4567	172	0.884927	0.746741	1.04868	0.158173	0.999831	4542	145	0.874168	0.742907	1.02862	0.10522	0.998408	4252	150	0.804649	0.659187	0.98221	0.0326434	0.718877	4228	124	0.719
RBBP5	seq.13631.1	0.868106	0.731192	1.03066	0.106273	0.998072	4567	172	0.883827	0.738218	1.05816	0.178769	0.999831	4542	145	0.800872	0.672181	0.954201	0.0129717	0.85496	4252	150	0.80789	0.664173	0.982705	0.0327964	0.718877	4228	124	0.719
MYOM3	seq.13966.30	1.16394	1.01239	1.33817	0.0329278	0.998072	4567	172	1.13852	0.971994	1.33358	0.107852	0.999831	4542	145	1.21179	1.04941	1.39931	0.00887036	0.794457	4252	150	1.19486	1.01574	1.40558	0.0316793	0.718877	4228	124	0.719
TCN2	seq.15560.52	1.24724	1.04787	1.48454	0.0129112	0.868193	4567	172	1.22009	1.01113	1.47224	0.0379441	0.999831	4542	145	1.25671	1.04649	1.50917	0.0144248	0.85496	4252	150	1.23894	1.01622	1.51046	0.0340751	0.718877	4228	124	0.719
ARL6	seq.18415.16	1.13942	0.918582	1.41336	0.235066	0.998072	4567	172	1.19012	0.940765	1.50557	0.146788	0.999831	4542	145	1.21347	0.96844	1.5205	0.0926978	0.99316	4252	150	1.28922	1.01894	1.6312	0.0343218	0.718877	4228	124	0.719
TSTD1	seq.19277.4	1.05272	0.8151	1.35961	0.693853	0.998072	4567	172	1.21815	0.93583	1.58564	0.142384	0.999831	4542	145	1.12903	0.86889	1.46704	0.363765	0.998408	4252	150	1.32864	1.02186	1.72751	0.0338855	0.718877	4228	124	0.719
KLF9	seq.22488.17	1.12855	0.969961	1.31306	0.117527	0.998072	4567	172	1.10202	0.935316	1.29842	0.245697	0.999831	4542	145	1.21933	1.04254	1.42609	0.0130895	0.85496	4252	150	1.2036	1.01586	1.42605	0.032204	0.718877	4228	124	0.719
NGDN	seq.22512.18	1.14341	1.00584	1.29979	0.0404581	0.998072	4567	172	1.15238	0.999813	1.32822	0.0502979	0.999831	4542	145	1.18487	1.03151	1.36102	0.0164509	0.857608	4252	150	1.18351	1.01356	1.38195	0.0331507	0.718877	4228	124	0.719
EXD1	seq.23591.9	1.10328	0.905105	1.34484	0.330569	0.998072	4567	172	1.14821	0.945911	1.39377	0.16222	0.999831	4542	145	1.15189	0.956318	1.38745	0.136353	0.998408	4252	150	1.21715	1.01607	1.45802	0.0329174	0.718877	4228	124	0.719
PSMC3	seq.23665.35	1.16237	0.909615	1.48536	0.229079	0.998072	4567	172	1.27187	1.01124	1.59967	0.0398244	0.999831	4542	145	1.19372	0.923136	1.54362	0.17696	0.998408	4252	150	1.31387	1.0226	1.6881	0.0327796	0.718877	4228	124	0.719
LRSAM1	seq.24411.144	1.07477	0.801942	1.44041	0.629361	0.998072	4567	172	1.22219	0.927668	1.61022	0.153787	0.999831	4542	145	1.12591	0.836821	1.51488	0.433432	0.998408	4252	150	1.33533	1.02425	1.7409	0.0325915	0.718877	4228	124	0.719
METTL26	seq.25236.11	1.10073	0.936167	1.29422	0.245386	0.998072	4567	172	1.14238	0.974942	1.33858	0.0997296	0.999831	4542	145	1.18314	1.00061	1.39896	0.0491621	0.92329	4252	150	1.19972	1.01628	1.41628	0.0314953	0.718781	4228	124	0.719
IRF5	seq.25460.36	1.16355	0.968357	1.39809	0.105922	0.998072	4567	172	1.16763	0.955214	1.42728	0.130345	0.999831	4542	145	1.23664	1.0378	1.47358	0.0175555	0.857608	4252	150	1.23458	1.0181	1.49709	0.0321606	0.718877	4228	124	0.719
PEBP1	seq.4276.10	1.0662	0.820767	1.38502	0.631061	0.998072	4567	172	1.21092	0.939335	1.56102	0.139676	0.999831	4542	145	1.16576	0.880336	1.54372	0.284415	0.998408	4252	150	1.3395	1.02213	1.75543	0.034122	0.718877	4228	124	0.719
ROBO3	seq.5117.14	0.920971	0.788351	1.0759	0.299369	0.998072	4567	172	0.90448	0.76315	1.07198	0.246807	0.999831	4542	145	0.840176	0.699414	1.00927	0.0626887	0.939686	4252	150	0.800859	0.652022	0.983671	0.0342643	0.718877	4228	124	0.719
CTRB1	seq.5671.1	1.13843	0.993033	1.30513	0.0629246	0.998072	4567	172	1.15571	0.999266	1.33665	0.0511641	0.999831	4542	145	1.16182	1.00211	1.34699	0.0468148	0.92329	4252	150	1.19017	1.0138	1.39722	0.03338	0.718877	4228	124	0.719
MFAP5	seq.6440.31	0.879353	0.699859	1.10488	0.269703	0.998072	4567	172	0.777978	0.605659	0.999323	0.0493798	0.999831	4542	145	0.854714	0.644421	1.13363	0.275923	0.998408	4252	150	0.729648	0.544907	0.977024	0.0343403	0.718877	4228	124	0.719
LRRC32	seq.7551.33	0.862083	0.669593	1.10991	0.249675	0.998072	4567	172	0.776325	0.590725	1.02024	0.0693291	0.999831	4542	145	0.824659	0.619206	1.09828	0.187261	0.998408	4252	150	0.710333	0.518072	0.973943	0.0336735	0.718877	4228	124	0.719
ELAPOR1	seq.9097.5	0.956401	0.803928	1.13779	0.614894	0.998072	4567	172	0.882305	0.710971	1.09493	0.255654	0.999831	4542	145	0.865871	0.706186	1.06166	0.166149	0.998408	4252	150	0.773791	0.610314	0.981056	0.0341791	0.718877	4228	124	0.719
JPH4	seq.9111.40	0.823504	0.678614	0.99933	0.049208	0.998072	4567	172	0.799981	0.633304	1.01052	0.0611833	0.999831	4542	145	0.780932	0.625854	0.974437	0.0285765	0.87466	4252	150	0.746517	0.569818	0.97801	0.0338921	0.718877	4228	124	0.719
CXCL9	seq.11593.21	0.884637	0.758752	1.03141	0.117551	0.998072	4567	172	0.864041	0.72175	1.03438	0.111436	0.999831	4542	145	0.830148	0.690223	0.998439	0.0480883	0.92329	4252	150	0.788181	0.631967	0.983009	0.0346812	0.723932	4228	124	0.724
PPP1R8	seq.13039.1	1.20092	1.03755	1.39002	0.0141255	0.883429	4567	172	1.13354	0.965574	1.33072	0.125558	0.999831	4542	145	1.25238	1.07751	1.45565	0.00335897	0.72372	4252	150	1.17366	1.00367	1.37244	0.0448697	0.760992	4228	124	0.724
MID2	seq.14249.68	0.957833	0.850087	1.07924	0.479197	0.998072	4567	172	0.872836	0.7597	1.00282	0.0548287	0.999831	4542	145	0.949715	0.834747	1.08052	0.433215	0.998408	4252	150	0.8513	0.733004	0.988688	0.0349417	0.724412	4228	124	0.724
IDE	seq.3197.70	1.12222	0.940162	1.33954	0.201675	0.998072	4567	172	1.13993	0.944388	1.37595	0.172554	0.999831	4542	145	1.18213	0.995117	1.40428	0.0568734	0.926638	4252	150	1.22471	1.0144	1.47861	0.0349633	0.724412	4228	124	0.724
CSRP3	seq.9171.11	1.03043	0.863662	1.2294	0.739286	0.998072	4567	172	1.1001	0.922232	1.31227	0.289034	0.999831	4542	145	1.10307	0.929492	1.30907	0.261437	0.998408	4252	150	1.1966	1.01257	1.41407	0.0351466	0.725334	4228	124	0.725
GNAI3	seq.12650.43	1.14199	0.948161	1.37545	0.161785	0.998072	4567	172	1.16335	0.974053	1.38943	0.0949496	0.999831	4542	145	1.18228	0.989712	1.41231	0.064894	0.940944	4252	150	1.20031	1.01261	1.42281	0.0353418	0.727168	4228	124	0.727
NPS	seq.6390.18	0.88307	0.765678	1.01846	0.0875131	0.998072	4567	172	0.863244	0.740819	1.0059	0.0594848	0.999831	4542	145	0.85556	0.724932	1.00973	0.0649684	0.940944	4252	150	0.827579	0.693759	0.987212	0.0354636	0.727168	4228	124	0.727
BAGE3	seq.6442.6	0.871332	0.756405	1.00372	0.0563236	0.998072	4567	172	0.862708	0.741753	1.00339	0.0553486	0.999831	4542	145	0.842666	0.716583	0.990933	0.0384382	0.92329	4252	150	0.834162	0.704414	0.987809	0.0355349	0.727168	4228	124	0.727
BLNK	seq.19225.11	0.948544	0.786666	1.14373	0.580035	0.998072	4567	172	0.915841	0.739305	1.13453	0.421005	0.999831	4542	145	0.824107	0.646823	1.04998	0.117499	0.998408	4252	150	0.766919	0.598367	0.982949	0.036098	0.731347	4228	124	0.731
CABP2	seq.24690.1	0.912557	0.776452	1.07252	0.266819	0.998072	4567	172	0.857715	0.717428	1.02543	0.0921116	0.999831	4542	145	0.880356	0.747706	1.03654	0.126188	0.998408	4252	150	0.823614	0.687068	0.987298	0.0358853	0.730881	4228	124	0.731
TNFSF15	seq.2968.61	1.13824	0.992896	1.30487	0.0632086	0.998072	4567	172	1.16561	1.00841	1.34733	0.0381479	0.999831	4542	145	1.15652	1.00153	1.33549	0.0476099	0.92329	4252	150	1.18412	1.01117	1.38665	0.035917	0.730881	4228	124	0.731
TOR1AIP2	seq.10553.8	1.09454	0.940136	1.27431	0.244279	0.998072	4567	172	1.12415	0.958307	1.31868	0.150707	0.999831	4542	145	1.13969	0.985036	1.31863	0.0788541	0.980121	4252	150	1.17021	1.00777	1.35884	0.0392581	0.747455	4228	124	0.747
MAX	seq.12411.60	1.0492	0.837879	1.31381	0.675567	0.998072	4567	172	1.1702	0.941016	1.45519	0.157562	0.999831	4542	145	1.09319	0.876681	1.36316	0.42881	0.998408	4252	150	1.24615	1.01068	1.5365	0.039459	0.747455	4228	124	0.747
CCT8	seq.12699.28	1.04331	0.82611	1.31762	0.721824	0.998072	4567	172	1.20715	0.949675	1.53443	0.124017	0.999831	4542	145	1.12836	0.873505	1.45756	0.355188	0.998408	4252	150	1.32307	1.01431	1.72581	0.0389419	0.747455	4228	124	0.747
TMEM8B	seq.12742.160	0.834373	0.679651	1.02432	0.0835605	0.998072	4567	172	0.804655	0.635055	1.01955	0.0719109	0.999831	4542	145	0.794289	0.628702	1.00349	0.0535062	0.926196	4252	150	0.751395	0.571918	0.987196	0.0401173	0.747455	4228	124	0.747
DUSP15	seq.12838.28	0.897803	0.752391	1.07132	0.231765	0.998072	4567	172	0.906862	0.739637	1.11189	0.347168	0.999831	4542	145	0.77148	0.617922	0.963199	0.0219567	0.857608	4252	150	0.745595	0.564212	0.98529	0.0389985	0.747455	4228	124	0.747
TRADD	seq.13507.51	1.17138	0.996575	1.37685	0.0550611	0.998072	4567	172	1.1496	0.968628	1.36439	0.110651	0.999831	4542	145	1.21023	1.0275	1.42545	0.0223184	0.857608	4252	150	1.19823	1.00894	1.42303	0.0392544	0.747455	4228	124	0.747
CAND1	seq.13937.75	1.08618	0.864577	1.36458	0.477659	0.998072	4567	172	1.19582	0.954581	1.49802	0.119792	0.999831	4542	145	1.16015	0.903995	1.48889	0.243187	0.998408	4252	150	1.2988	1.01532	1.66144	0.0374342	0.747455	4228	124	0.747
RAMP1	seq.15436.40	0.961599	0.825774	1.11976	0.614253	0.998072	4567	172	0.839178	0.706802	0.996348	0.0453093	0.999831	4542	145	0.95793	0.815879	1.12471	0.599688	0.998408	4252	150	0.827279	0.690371	0.991338	0.0399512	0.747455	4228	124	0.747
UBLCP1	seq.19124.9	1.03365	0.837005	1.2765	0.758516	0.998072	4567	172	1.21206	0.987797	1.48725	0.0654191	0.999831	4542	145	1.06442	0.855758	1.32395	0.57496	0.998408	4252	150	1.2553	1.01109	1.5585	0.0394074	0.747455	4228	124	0.747
ACVR2A	seq.19208.8	0.936863	0.817254	1.07398	0.349338	0.998072	4567	172	0.857086	0.736038	0.99804	0.047116	0.999831	4542	145	0.924986	0.80176	1.06715	0.285072	0.998408	4252	150	0.843193	0.717756	0.990552	0.0379381	0.747455	4228	124	0.747
HAGH	seq.19267.14	1.05146	0.847278	1.30485	0.648721	0.998072	4567	172	1.19351	0.965621	1.47517	0.101761	0.999831	4542	145	1.11341	0.884533	1.4015	0.360209	0.998408	4252	150	1.27854	1.01356	1.61278	0.0381076	0.747455	4228	124	0.747
ARPC2	seq.23376.56	1.16258	0.903547	1.49588	0.241459	0.998072	4567	172	1.23348	0.933922	1.62911	0.139311	0.999831	4542	145	1.29028	0.992198	1.67793	0.0572282	0.926638	4252	150	1.33472	1.01699	1.75174	0.0373952	0.747455	4228	124	0.747
DDRGK1	seq.23559.10	0.996202	0.74909	1.32483	0.979127	0.998072	4567	172	1.18524	0.896378	1.56718	0.233092	0.999831	4542	145	1.09371	0.828394	1.44401	0.527443	0.998408	4252	150	1.32087	1.01342	1.72159	0.039533	0.747455	4228	124	0.747
KLHL40	seq.24256.7	0.98446	0.825322	1.17428	0.861785	0.998072	4567	172	0.859807	0.719204	1.0279	0.0973216	0.999831	4542	145	0.891356	0.732063	1.08531	0.252217	0.998408	4252	150	0.802884	0.651727	0.989098	0.0391125	0.747455	4228	124	0.747
LRRC75A	seq.24718.8	0.95351	0.802651	1.13272	0.587984	0.998072	4567	172	0.846751	0.690757	1.03797	0.10932	0.999831	4542	145	0.870155	0.714735	1.05937	0.165907	0.998408	4252	150	0.784037	0.621669	0.988812	0.0398759	0.747455	4228	124	0.747
OXCT1	seq.25043.74	1.16871	0.862895	1.58291	0.31381	0.998072	4567	172	1.23091	0.88851	1.70526	0.211587	0.999831	4542	145	1.2959	0.963513	1.74294	0.0864938	0.983043	4252	150	1.40076	1.01855	1.92639	0.0381684	0.747455	4228	124	0.747
EGFR	seq.2677.1	0.970698	0.805785	1.16936	0.754238	0.998072	4567	172	0.868407	0.713735	1.0566	0.158576	0.999831	4542	145	0.906628	0.730952	1.12453	0.372387	0.998408	4252	150	0.786815	0.625923	0.989063	0.0399546	0.747455	4228	124	0.747
HEXB	seq.6075.61	0.865364	0.746822	1.00272	0.0543742	0.998072	4567	172	0.852698	0.728922	0.997492	0.0464393	0.999831	4542	145	0.839474	0.70633	0.997716	0.0470384	0.92329	4252	150	0.824569	0.686963	0.989739	0.038385	0.747455	4228	124	0.747
VAMP4	seq.7732.45	0.962236	0.829027	1.11685	0.612606	0.998072	4567	172	0.910788	0.756816	1.09609	0.322667	0.999831	4542	145	0.870978	0.736952	1.02938	0.105155	0.998408	4252	150	0.805393	0.655499	0.989564	0.0394134	0.747455	4228	124	0.747
ABCC6	seq.8935.22	0.972705	0.805857	1.1741	0.77315	0.998072	4567	172	0.928143	0.739573	1.16479	0.519871	0.999831	4542	145	0.852666	0.68691	1.05842	0.148404	0.998408	4252	150	0.772189	0.603708	0.987689	0.0395284	0.747455	4228	124	0.747
PAWR	seq.9565.6	1.06772	0.878822	1.29721	0.509503	0.998072	4567	172	1.12665	0.925135	1.37207	0.235598	0.999831	4542	145	1.12189	0.932045	1.35039	0.224	0.998408	4252	150	1.20312	1.00942	1.43399	0.0389493	0.747455	4228	124	0.747
LCP1	seq.9749.190	0.877629	0.721101	1.06813	0.192791	0.998072	4567	172	0.87591	0.71071	1.07951	0.214047	0.999831	4542	145	0.808476	0.659511	0.991088	0.0407407	0.92329	4252	150	0.793773	0.638237	0.987213	0.037925	0.747455	4228	124	0.747
NQO1	seq.9837.60	0.917643	0.77584	1.08536	0.315598	0.998072	4567	172	0.872279	0.736788	1.03269	0.112611	0.999831	4542	145	0.892553	0.735994	1.08241	0.248018	0.998408	4252	150	0.811283	0.665615	0.98883	0.0383361	0.747455	4228	124	0.747
GJA1	seq.9937.7	0.840755	0.711736	0.993161	0.0412772	0.998072	4567	172	0.867376	0.726657	1.03535	0.115165	0.999831	4542	145	0.776756	0.631489	0.955441	0.0167793	0.857608	4252	150	0.787848	0.627554	0.989087	0.0399226	0.747455	4228	124	0.747
AGAP2	seq.14291.53	1.04527	0.787372	1.38765	0.759374	0.998072	4567	172	1.16217	0.892331	1.51362	0.264885	0.999831	4542	145	1.15521	0.885396	1.50725	0.287725	0.998408	4252	150	1.29159	1.01123	1.64969	0.0404205	0.751183	4228	124	0.751
MCTS1	seq.12488.9	1.07506	0.878369	1.31581	0.482637	0.998072	4567	172	1.20947	0.994876	1.47034	0.0563336	0.999831	4542	145	1.08723	0.875391	1.35033	0.449432	0.998408	4252	150	1.24195	1.0089	1.52882	0.0409917	0.751869	4228	124	0.752
LGALS13	seq.19147.6	0.985995	0.843977	1.15191	0.85892	0.998072	4567	172	0.927069	0.779738	1.10224	0.391113	0.999831	4542	145	0.892155	0.739106	1.0769	0.234651	0.998408	4252	150	0.802514	0.650094	0.990671	0.0406364	0.751869	4228	124	0.752
CLIC2	seq.22954.10	1.03435	0.894766	1.1957	0.647965	0.998072	4567	172	1.12193	0.971781	1.29527	0.116534	0.999831	4542	145	1.07128	0.905975	1.26675	0.42069	0.998408	4252	150	1.18957	1.00706	1.40516	0.0410767	0.751869	4228	124	0.752
SNX4	seq.3903.49	1.00873	0.754831	1.34804	0.953139	0.998072	4567	172	1.16081	0.849635	1.58595	0.348983	0.999831	4542	145	1.13272	0.852441	1.50516	0.390201	0.998408	4252	150	1.35725	1.0125	1.81939	0.041045	0.751869	4228	124	0.752
MAGI2	seq.14066.49	1.07813	0.929329	1.25077	0.320809	0.998072	4567	172	1.09039	0.929981	1.27847	0.286478	0.999831	4542	145	1.15597	0.997003	1.34028	0.0548291	0.926196	4252	150	1.17592	1.00447	1.37663	0.0438594	0.755476	4228	124	0.755
ATXN3	seq.16825.20	1.04896	0.843138	1.30502	0.667991	0.998072	4567	172	1.19718	0.968847	1.47933	0.0955393	0.999831	4542	145	1.10213	0.876124	1.38645	0.40623	0.998408	4252	150	1.26486	1.00726	1.58833	0.043147	0.755476	4228	124	0.755
CD37	seq.18202.22	0.967852	0.826761	1.13302	0.684392	0.998072	4567	172	0.861346	0.708449	1.04724	0.134385	0.999831	4542	145	0.941242	0.79273	1.11757	0.489446	0.998408	4252	150	0.791026	0.631348	0.991088	0.0415685	0.755476	4228	124	0.755
UBE2D3	seq.19280.29	1.11785	0.920287	1.35783	0.261525	0.998072	4567	172	1.18595	0.978263	1.43773	0.0825168	0.999831	4542	145	1.1367	0.913952	1.41374	0.249554	0.998408	4252	150	1.23842	1.00749	1.52229	0.0422707	0.755476	4228	124	0.755
FGF9	seq.19584.33	0.947764	0.790179	1.13678	0.563093	0.998072	4567	172	0.90117	0.724091	1.12156	0.351197	0.999831	4542	145	0.831339	0.682705	1.01233	0.0660554	0.949223	4252	150	0.779461	0.612609	0.991757	0.0426266	0.755476	4228	124	0.755
CNTN3	seq.20586.18	0.940833	0.787106	1.12458	0.502823	0.998072	4567	172	0.857297	0.710382	1.03459	0.108406	0.999831	4542	145	0.891165	0.730586	1.08704	0.255667	0.998408	4252	150	0.807442	0.655804	0.994141	0.0438663	0.755476	4228	124	0.755
CCN2	seq.2975.19	1.12285	0.9627	1.30963	0.139992	0.998072	4567	172	1.16094	0.998067	1.3504	0.0530008	0.999831	4542	145	1.13624	0.97612	1.32262	0.09933	0.998408	4252	150	1.16756	1.0044	1.35723	0.0436837	0.755476	4228	124	0.755
TGFBI	seq.3283.21	0.914811	0.749274	1.11692	0.381976	0.998072	4567	172	0.839377	0.674594	1.04441	0.116345	0.999831	4542	145	0.870144	0.698343	1.08421	0.215156	0.998408	4252	150	0.774875	0.605617	0.991436	0.0425191	0.755476	4228	124	0.755
AKR7A2	seq.4188.1	1.04187	0.767637	1.41407	0.7924	0.998072	4567	172	1.15855	0.830443	1.61628	0.386325	0.999831	4542	145	1.20995	0.881834	1.66014	0.23767	0.998408	4252	150	1.40259	1.01285	1.94232	0.0416649	0.755476	4228	124	0.755
PDIA3	seq.4719.58	1.12862	0.841488	1.51372	0.419216	0.998072	4567	172	1.22107	0.910714	1.63718	0.181909	0.999831	4542	145	1.23902	0.933918	1.64379	0.137285	0.998408	4252	150	1.34491	1.00929	1.79214	0.0430598	0.755476	4228	124	0.755
GPNMB	seq.5080.131	0.992588	0.825968	1.19282	0.936757	0.998072	4567	172	0.897856	0.73133	1.1023	0.303283	0.999831	4542	145	0.908707	0.744937	1.10848	0.345066	0.998408	4252	150	0.7952	0.636478	0.993505	0.0436576	0.755476	4228	124	0.755
JAG2	seq.5093.47	0.815619	0.65893	1.00957	0.0611351	0.998072	4567	172	0.798637	0.623571	1.02285	0.0749092	0.999831	4542	145	0.73994	0.569154	0.961973	0.0244763	0.857608	4252	150	0.728145	0.536381	0.988466	0.0419124	0.755476	4228	124	0.755
CSAG1	seq.5716.49	0.915622	0.789061	1.06248	0.245457	0.998072	4567	172	0.854542	0.717028	1.01843	0.0790884	0.999831	4542	145	0.864368	0.719126	1.03894	0.120437	0.998408	4252	150	0.806485	0.65523	0.992656	0.0424014	0.755476	4228	124	0.755
EDN1	seq.6495.14	0.967098	0.836565	1.118	0.6511	0.998072	4567	172	0.960667	0.818611	1.12737	0.623066	0.999831	4542	145	0.839184	0.700673	1.00508	0.0567816	0.926638	4252	150	0.806159	0.654259	0.993326	0.0430872	0.755476	4228	124	0.755
PTPRJ	seq.8250.2	0.982736	0.831335	1.16171	0.838341	0.998072	4567	172	0.872303	0.727709	1.04563	0.13955	0.999831	4542	145	0.925866	0.764077	1.12191	0.43184	0.998408	4252	150	0.80407	0.65044	0.993986	0.043825	0.755476	4228	124	0.755
PRDX3	seq.8358.30	1.00761	0.72408	1.40216	0.964137	0.998072	4567	172	1.14789	0.813696	1.61933	0.432086	0.999831	4542	145	1.18688	0.848806	1.6596	0.316521	0.998408	4252	150	1.39699	1.00974	1.93277	0.04354	0.755476	4228	124	0.755
DEFB118	seq.9306.7	0.926457	0.768454	1.11695	0.423305	0.998072	4567	172	0.900788	0.731546	1.10918	0.325088	0.999831	4542	145	0.82834	0.670552	1.02326	0.0806814	0.980121	4252	150	0.77059	0.599186	0.991025	0.0423326	0.755476	4228	124	0.755
PRR27	seq.9607.39	0.886903	0.753502	1.04392	0.148977	0.998072	4567	172	0.831812	0.697058	0.992617	0.0411335	0.999831	4542	145	0.897713	0.762747	1.05656	0.194251	0.998408	4252	150	0.836903	0.704429	0.99429	0.0428533	0.755476	4228	124	0.755
SEMA4B	seq.9805.51	0.948603	0.797425	1.12844	0.551358	0.998072	4567	172	0.882704	0.728921	1.06893	0.201432	0.999831	4542	145	0.8586	0.691974	1.06535	0.166074	0.998408	4252	150	0.788625	0.626172	0.993224	0.0436152	0.755476	4228	124	0.755
GPNMB	seq.8289.8	0.956088	0.805832	1.13436	0.606704	0.998072	4567	172	0.878143	0.728722	1.0582	0.172087	0.999831	4542	145	0.909783	0.752369	1.10013	0.329333	0.998408	4252	150	0.810972	0.661277	0.994555	0.0441737	0.757921	4228	124	0.758
FGFBP1	seq.15494.11	0.951035	0.784132	1.15346	0.610107	0.998072	4567	172	0.887589	0.713548	1.10408	0.284238	0.999831	4542	145	0.878725	0.722618	1.06856	0.195136	0.998408	4252	150	0.803672	0.649336	0.994691	0.0445447	0.759972	4228	124	0.76
None	seq.8355.80	1.10168	0.954324	1.27178	0.186227	0.998072	4567	172	1.15323	1.00115	1.32842	0.0481667	0.999831	4542	145	1.1011	0.935905	1.29546	0.245529	0.998408	4252	150	1.17139	1.00387	1.36686	0.0445288	0.759972	4228	124	0.76
MGAT5	seq.21768.9	0.922109	0.765497	1.11076	0.393167	0.998072	4567	172	0.847148	0.692957	1.03565	0.105601	0.999831	4542	145	0.909814	0.737155	1.12291	0.378705	0.998408	4252	150	0.792403	0.631081	0.994964	0.0451268	0.760992	4228	124	0.761
ANGPTL3	seq.10391.1	1.11869	0.91117	1.37347	0.284001	0.998072	4567	172	1.21431	0.976296	1.51034	0.0810756	0.999831	4542	145	1.1677	0.93545	1.45761	0.170612	0.998408	4252	150	1.27418	1.00509	1.61531	0.0452919	0.761978	4228	124	0.762
FN3K	seq.21147.9	1.12073	0.859891	1.46069	0.399089	0.998072	4567	172	1.27174	0.966594	1.67321	0.0859289	0.999831	4542	145	1.16071	0.867596	1.55284	0.315588	0.998408	4252	150	1.35332	1.00607	1.82042	0.045499	0.761978	4228	124	0.762
DEFB119	seq.8315.5	0.844917	0.689552	1.03529	0.104058	0.998072	4567	172	0.797936	0.643964	0.988724	0.0390483	0.999831	4542	145	0.840704	0.665956	1.06131	0.144422	0.998408	4252	150	0.781992	0.614567	0.995027	0.0454403	0.761978	4228	124	0.762
GRHPR	seq.18295.102	1.14327	0.914901	1.42863	0.238922	0.998072	4567	172	1.18929	0.937356	1.50894	0.153478	0.999831	4542	145	1.18446	0.956779	1.46631	0.120108	0.998408	4252	150	1.25603	1.00417	1.57107	0.0458882	0.765094	4228	124	0.765
RNASE10	seq.5602.62	0.872279	0.743018	1.02403	0.0949478	0.998072	4567	172	0.890854	0.753955	1.05261	0.174568	0.999831	4542	145	0.811169	0.670851	0.980836	0.0307968	0.879255	4252	150	0.815774	0.66796	0.996299	0.0458951	0.765094	4228	124	0.765
BAMBI	seq.20514.8	0.897603	0.759304	1.06109	0.205725	0.998072	4567	172	0.844471	0.68987	1.03372	0.101305	0.999831	4542	145	0.842109	0.691604	1.02537	0.087147	0.983043	4252	150	0.777084	0.606492	0.995661	0.0461102	0.766924	4228	124	0.767
TOM1L1	seq.13652.2	1.1197	0.954038	1.31412	0.166354	0.998072	4567	172	1.14511	0.979885	1.33819	0.088306	0.999831	4542	145	1.1526	0.967635	1.37293	0.11153	0.998408	4252	150	1.17667	1.00263	1.38092	0.0463536	0.769132	4228	124	0.769
SPINK4	seq.19213.1	1.20026	1.03297	1.39463	0.0171459	0.924307	4567	172	1.11448	0.937546	1.3248	0.219131	0.999831	4542	145	1.23837	1.06888	1.43473	0.00441218	0.768868	4252	150	1.146	0.969826	1.35418	0.109547	0.801521	4228	124	0.769
ESAM	seq.2981.9	1.20199	0.970638	1.48847	0.0916479	0.998072	4567	172	1.26411	1.01303	1.57742	0.0380258	0.999831	4542	145	1.1722	0.939924	1.46187	0.158505	0.998408	4252	150	1.26255	1.00355	1.58838	0.0465597	0.769132	4228	124	0.769
AHSP	seq.9025.5	1.1406	1.00143	1.29911	0.0475371	0.998072	4567	172	1.07671	0.933388	1.24204	0.310521	0.999831	4542	145	1.21624	1.05971	1.39588	0.00534988	0.768868	4252	150	1.15951	0.993512	1.35325	0.0604598	0.801124	4228	124	0.769
TCEA3	seq.23547.21	1.04939	0.872293	1.26245	0.609197	0.998072	4567	172	1.11574	0.946074	1.31584	0.193146	0.999831	4542	145	1.10912	0.911804	1.34915	0.300095	0.998408	4252	150	1.19567	1.00256	1.42598	0.0467603	0.76965	4228	124	0.77
SRPK2	seq.21435.143	0.836365	0.694177	1.00768	0.0601689	0.998072	4567	172	0.808716	0.660014	0.990921	0.040562	0.999831	4542	145	0.839262	0.68705	1.02519	0.0861086	0.983043	4252	150	0.804381	0.64871	0.99741	0.0472966	0.774282	4228	124	0.774
HRK	seq.8008.28	0.893872	0.745859	1.07126	0.224466	0.998072	4567	172	0.87833	0.713388	1.08141	0.221515	0.999831	4542	145	0.830507	0.687994	1.00254	0.053165	0.926196	4252	150	0.80213	0.645146	0.997313	0.0472323	0.774282	4228	124	0.774
CARD17	seq.18267.74	0.888258	0.709398	1.11221	0.301643	0.998072	4567	172	0.907598	0.711504	1.15774	0.435004	0.999831	4542	145	0.721285	0.542848	0.958374	0.0242454	0.857608	4252	150	0.72663	0.529822	0.996544	0.0475373	0.775713	4228	124	0.776
TBC1D20	seq.23687.27	1.10429	0.815183	1.49594	0.521805	0.998072	4567	172	1.2367	0.912322	1.67641	0.171067	0.999831	4542	145	1.16334	0.853551	1.58557	0.338224	0.998408	4252	150	1.34649	1.00304	1.80753	0.0476773	0.775713	4228	124	0.776
UGT1A8	seq.8899.75	0.924722	0.761227	1.12333	0.430454	0.998072	4567	172	0.871991	0.691524	1.09956	0.246946	0.999831	4542	145	0.834338	0.664178	1.04809	0.119621	0.998408	4252	150	0.753792	0.569826	0.997149	0.0477034	0.775713	4228	124	0.776
CCT5	seq.12569.25	1.04195	0.82372	1.31799	0.731818	0.998072	4567	172	1.19629	0.935231	1.53022	0.153612	0.999831	4542	145	1.13491	0.880725	1.46246	0.327952	0.998408	4252	150	1.31173	1.00196	1.71727	0.0483548	0.776682	4228	124	0.777
DNAJB8	seq.20942.4	1.05312	0.767112	1.44576	0.748869	0.998072	4567	172	1.19865	0.885687	1.62221	0.240516	0.999831	4542	145	1.15403	0.835391	1.59419	0.384851	0.998408	4252	150	1.33947	1.00206	1.79049	0.0483947	0.776682	4228	124	0.777
PWWP2B	seq.24267.24	0.914864	0.772169	1.08393	0.303723	0.998072	4567	172	0.9006	0.757565	1.07064	0.23544	0.999831	4542	145	0.835601	0.679323	1.02783	0.0890998	0.986413	4252	150	0.811891	0.660229	0.998392	0.048239	0.776682	4228	124	0.777
LGALS8	seq.4909.68	0.893014	0.750328	1.06283	0.202689	0.998072	4567	172	0.845736	0.699696	1.02226	0.0832053	0.999831	4542	145	0.816896	0.663026	1.00647	0.0575132	0.926638	4252	150	0.79324	0.630452	0.998061	0.0480912	0.776682	4228	124	0.777
ELK3	seq.5707.55	1.06216	0.830692	1.35813	0.630607	0.998072	4567	172	1.20263	0.960781	1.50535	0.107238	0.999831	4542	145	1.09552	0.867259	1.38386	0.444098	0.998408	4252	150	1.23953	1.00178	1.5337	0.0481101	0.776682	4228	124	0.777
VCL	seq.8750.46	1.19868	0.992124	1.44824	0.0603741	0.998072	4567	172	1.23468	1.01304	1.50482	0.0367638	0.999831	4542	145	1.19295	0.971651	1.46466	0.0919315	0.99316	4252	150	1.2349	1.00148	1.52273	0.0484027	0.776682	4228	124	0.777
ASMTL	seq.10089.7	1.15975	0.969581	1.38721	0.104819	0.998072	4567	172	1.1078	0.89993	1.3637	0.334254	0.999831	4542	145	1.21764	1.03442	1.4333	0.0179426	0.857608	4252	150	1.19771	1.00098	1.43311	0.0487581	0.778954	4228	124	0.779
SEMA6D	seq.20530.2	0.917881	0.778125	1.08274	0.309274	0.998072	4567	172	0.849732	0.711039	1.01548	0.0732833	0.999831	4542	145	0.90009	0.754507	1.07376	0.242256	0.998408	4252	150	0.822743	0.677676	0.998865	0.04867	0.778954	4228	124	0.779
ABI3	seq.23553.1	0.934604	0.793083	1.10138	0.419473	0.998072	4567	172	0.848078	0.702771	1.02343	0.0857106	0.999831	4542	145	0.887245	0.708943	1.11039	0.295937	0.998408	4252	150	0.752269	0.566546	0.998876	0.0490937	0.78089	4228	124	0.781
BLVRA	seq.11382.5	1.02468	0.768517	1.36623	0.868071	0.998072	4567	172	1.19434	0.910735	1.56626	0.19915	0.999831	4542	145	1.11508	0.824311	1.50842	0.479796	0.998408	4252	150	1.32253	1.00007	1.74896	0.0499389	0.786107	4228	124	0.786
SPOCK1	seq.11487.4	0.998203	0.848297	1.1746	0.982718	0.998072	4567	172	0.814005	0.656377	1.00949	0.0609282	0.999831	4542	145	0.983221	0.820582	1.1781	0.854473	0.998408	4252	150	0.7763	0.601917	1.0012	0.0510898	0.787059	4228	124	0.787
ID2	seq.15403.53	0.87865	0.750869	1.02818	0.106644	0.998072	4567	172	0.912631	0.774118	1.07593	0.276334	0.999831	4542	145	0.765517	0.631283	0.928294	0.0065991	0.794457	4252	150	0.811022	0.657602	1.00023	0.0502523	0.786682	4228	124	0.787
MAPK9	seq.15604.18	1.15022	0.866844	1.52623	0.332147	0.998072	4567	172	1.18239	0.902229	1.54954	0.22464	0.999831	4542	145	1.23483	0.947375	1.60951	0.118725	0.998408	4252	150	1.27175	0.998656	1.61953	0.0512836	0.787059	4228	124	0.787
SEPSECS	seq.17357.33	0.889483	0.745257	1.06162	0.194458	0.998072	4567	172	0.862934	0.727611	1.02343	0.0902787	0.999831	4542	145	0.81127	0.677502	0.971449	0.0229009	0.857608	4252	150	0.837182	0.700206	1.00095	0.0512308	0.787059	4228	124	0.787
TATDN1	seq.20376.64	1.02229	0.809944	1.29031	0.852773	0.998072	4567	172	1.15297	0.923307	1.43976	0.209135	0.999831	4542	145	1.10178	0.864053	1.4049	0.434434	0.998408	4252	150	1.25372	0.998702	1.57387	0.0513182	0.787059	4228	124	0.787
GPC3	seq.4842.62	0.923327	0.777176	1.09696	0.364219	0.998072	4567	172	0.838686	0.691453	1.01727	0.0740725	0.999831	4542	145	0.89351	0.733036	1.08911	0.264927	0.998408	4252	150	0.801001	0.641373	1.00036	0.0503643	0.786682	4228	124	0.787
TNFRSF6B	seq.5070.76	0.907298	0.770059	1.06899	0.244973	0.998072	4567	172	0.901914	0.753423	1.07967	0.260672	0.999831	4542	145	0.8101	0.661126	0.992643	0.0422327	0.92329	4252	150	0.79159	0.625788	1.00132	0.0512958	0.787059	4228	124	0.787
BPIFA2	seq.5695.5	0.892205	0.768519	1.0358	0.134122	0.998072	4567	172	0.847812	0.718692	1.00013	0.0501744	0.999831	4542	145	0.889521	0.752942	1.05087	0.168653	0.998408	4252	150	0.831666	0.691427	1.00035	0.0504297	0.786682	4228	124	0.787
CER1	seq.6230.56	0.908959	0.754345	1.09526	0.315643	0.998072	4567	172	0.908503	0.737344	1.11939	0.367592	0.999831	4542	145	0.788159	0.625477	0.993153	0.0435656	0.92329	4252	150	0.765635	0.58551	1.00117	0.0510063	0.787059	4228	124	0.787
GLT8D1	seq.8955.60	0.857882	0.731222	1.00648	0.0600063	0.998072	4567	172	0.828319	0.689012	0.995791	0.0449745	0.999831	4542	145	0.848843	0.707701	1.01813	0.0773438	0.975198	4252	150	0.806217	0.649464	1.0008	0.0508528	0.787059	4228	124	0.787
NT5C2	seq.11288.26	1.09163	0.893005	1.33444	0.392205	0.998072	4567	172	1.20458	0.996623	1.45592	0.0542275	0.999831	4542	145	1.06445	0.860053	1.31741	0.56589	0.998408	4252	150	1.21585	0.998709	1.48019	0.0515193	0.788058	4228	124	0.788
CXCL13	seq.13701.2	1.16205	1.00564	1.3428	0.0417277	0.998072	4567	172	1.16706	1.00198	1.35933	0.0471012	0.999831	4542	145	1.15368	0.986559	1.34911	0.0733723	0.967287	4252	150	1.17602	0.998873	1.38459	0.0515997	0.788058	4228	124	0.788
GSTK1	seq.13474.40	1.02948	0.760594	1.39343	0.850777	0.998072	4567	172	1.10788	0.796307	1.54136	0.543141	0.999831	4542	145	1.20317	0.884141	1.63731	0.239341	0.998408	4252	150	1.36463	0.996923	1.86797	0.0522868	0.788633	4228	124	0.789
TCN1	seq.19614.8	1.11807	0.942511	1.32632	0.200335	0.998072	4567	172	1.18773	0.989619	1.42551	0.0646151	0.999831	4542	145	1.13372	0.93789	1.37044	0.194555	0.998408	4252	150	1.22247	0.998307	1.49698	0.0519433	0.788633	4228	124	0.789
ZRANB1	seq.21754.5	1.13259	0.954303	1.34417	0.154231	0.998072	4567	172	1.12741	0.944821	1.34529	0.183404	0.999831	4542	145	1.1562	0.979217	1.36516	0.086854	0.983043	4252	150	1.17291	0.998335	1.37801	0.0524116	0.788882	4228	124	0.789
HES5	seq.22466.27	1.1538	0.980561	1.35765	0.0847954	0.998072	4567	172	1.18353	0.989268	1.41593	0.0654682	0.999831	4542	145	1.13866	0.958765	1.3523	0.138864	0.998408	4252	150	1.19829	0.998285	1.43836	0.0521882	0.788633	4228	124	0.789
PXDN	seq.13463.1	1.11201	0.939359	1.3164	0.217461	0.998072	4567	172	1.16481	0.979878	1.38465	0.0837109	0.999831	4542	145	1.11868	0.934068	1.33978	0.222926	0.998408	4252	150	1.20133	0.997823	1.44635	0.0527471	0.791496	4228	124	0.791
CD200R1	seq.5103.30	0.913507	0.762086	1.09501	0.327894	0.998072	4567	172	0.814841	0.648947	1.02314	0.0778986	0.999831	4542	145	0.873935	0.711842	1.07294	0.197958	0.998408	4252	150	0.772062	0.594214	1.00314	0.0528026	0.791496	4228	124	0.791
RNPC3	seq.12814.17	1.11887	0.975175	1.28373	0.109256	0.998072	4567	172	1.14268	0.985794	1.32452	0.0767086	0.999831	4542	145	1.11706	0.968353	1.2886	0.128816	0.998408	4252	150	1.15911	0.997341	1.34712	0.054194	0.791838	4228	124	0.792
ECI2	seq.12859.33	1.17358	0.918814	1.49898	0.199887	0.998072	4567	172	1.1779	0.912585	1.52034	0.208582	0.999831	4542	145	1.22278	0.959903	1.55765	0.103392	0.998408	4252	150	1.27147	0.994648	1.62533	0.0552167	0.791838	4228	124	0.792
CYTIP	seq.13612.7	0.830933	0.67877	1.01721	0.0727037	0.998072	4567	172	0.790538	0.603177	1.0361	0.0885579	0.999831	4542	145	0.790575	0.648726	0.96344	0.019851	0.857608	4252	150	0.777166	0.600935	1.00508	0.0546817	0.791838	4228	124	0.792
TPSG1	seq.14103.12	0.878139	0.732637	1.05254	0.159725	0.998072	4567	172	0.844151	0.682131	1.04465	0.119182	0.999831	4542	145	0.842107	0.683507	1.03751	0.106499	0.998408	4252	150	0.783924	0.612453	1.0034	0.053233	0.791838	4228	124	0.792
MESD	seq.15299.102	1.00227	0.739688	1.35807	0.988324	0.998072	4567	172	1.17449	0.861211	1.60174	0.309593	0.999831	4542	145	1.09906	0.818767	1.47531	0.529456	0.998408	4252	150	1.32855	0.993786	1.77609	0.0551214	0.791838	4228	124	0.792
PTGES2	seq.18458.4	1.05812	0.868738	1.28879	0.574458	0.998072	4567	172	1.0645	0.867663	1.30598	0.549054	0.999831	4542	145	1.18173	0.996118	1.40193	0.0554435	0.926196	4252	150	1.18441	0.997102	1.40691	0.0539849	0.791838	4228	124	0.792
CHMP4A	seq.21341.19	1.03587	0.77007	1.39343	0.815782	0.998072	4567	172	1.22756	0.923669	1.63142	0.157703	0.999831	4542	145	1.10858	0.80445	1.52768	0.528684	0.998408	4252	150	1.34175	0.994258	1.8107	0.0545627	0.791838	4228	124	0.792
APOL2	seq.23566.6	0.916392	0.783257	1.07216	0.275664	0.998072	4567	172	0.897364	0.760459	1.05892	0.199772	0.999831	4542	145	0.847478	0.70945	1.01236	0.0680667	0.949907	4252	150	0.830863	0.687517	1.0041	0.0551499	0.791838	4228	124	0.792
KHSRP	seq.24926.9	0.835972	0.683107	1.02304	0.0820571	0.998072	4567	172	0.840424	0.690948	1.02224	0.0818771	0.999831	4542	145	0.823517	0.659782	1.02789	0.086013	0.983043	4252	150	0.812709	0.657944	1.00388	0.0543442	0.791838	4228	124	0.792
TNFRSF9	seq.2598.9	1.12062	0.958993	1.3095	0.151828	0.998072	4567	172	1.15635	0.991859	1.34811	0.0635125	0.999831	4542	145	1.13321	0.965976	1.3294	0.124765	0.998408	4252	150	1.17258	0.996678	1.37953	0.054874	0.791838	4228	124	0.792
TACSTD2	seq.2619.72	1.09664	0.971432	1.23799	0.135847	0.998072	4567	172	1.09291	0.960052	1.24414	0.179113	0.999831	4542	145	1.15767	1.01443	1.32113	0.0298125	0.879255	4252	150	1.15473	0.996891	1.33755	0.0550513	0.791838	4228	124	0.792
SERPINA7	seq.2706.69	1.20222	0.993934	1.45415	0.0577859	0.998072	4567	172	1.24105	1.01206	1.52186	0.0379701	0.999831	4542	145	1.17199	0.956046	1.4367	0.126664	0.998408	4252	150	1.24212	0.997114	1.54733	0.0530862	0.791838	4228	124	0.792
SERPINA4	seq.3449.58	0.820134	0.698003	0.963634	0.01594	0.912791	4567	172	0.85392	0.718114	1.01541	0.0739425	0.999831	4542	145	0.778784	0.646537	0.938083	0.00845956	0.794457	4252	150	0.819217	0.668816	1.00344	0.0540005	0.791838	4228	124	0.792
IGHE	seq.4135.84	0.836984	0.718277	0.975309	0.022585	0.998072	4567	172	0.848499	0.72122	0.998239	0.0475631	0.999831	4542	145	0.823806	0.697546	0.97292	0.0224045	0.857608	4252	150	0.838476	0.700863	1.00311	0.0540951	0.791838	4228	124	0.792
SCARB2	seq.5100.53	0.913019	0.782496	1.06531	0.247615	0.998072	4567	172	0.920338	0.774187	1.09408	0.34675	0.999831	4542	145	0.820529	0.690759	0.974679	0.0243226	0.857608	4252	150	0.82213	0.673472	1.0036	0.0542721	0.791838	4228	124	0.792
CD5	seq.5596.75	0.888266	0.738272	1.06873	0.209268	0.998072	4567	172	0.85232	0.701543	1.0355	0.107664	0.999831	4542	145	0.854041	0.698577	1.0441	0.123802	0.998408	4252	150	0.811715	0.656214	1.00406	0.0545273	0.791838	4228	124	0.792
HINT1	seq.5900.11	1.00803	0.864562	1.1753	0.918716	0.998072	4567	172	1.12451	0.974828	1.29717	0.107358	0.999831	4542	145	1.03449	0.882516	1.21263	0.67576	0.998408	4252	150	1.15771	0.997572	1.34355	0.0538551	0.791838	4228	124	0.792
STMN2	seq.10900.272	1.03809	0.863149	1.24849	0.691359	0.998072	4567	172	1.18368	1.00442	1.39493	0.0441587	0.999831	4542	145	1.04034	0.857129	1.26272	0.689023	0.998408	4252	150	1.18603	0.996052	1.41223	0.0554182	0.792519	4228	124	0.793
CISD2	seq.8094.20	0.788828	0.632503	0.98379	0.035289	0.998072	4567	172	0.829773	0.660742	1.04205	0.108358	0.999831	4542	145	0.697756	0.521753	0.933129	0.0152371	0.85496	4252	150	0.741748	0.546349	1.00703	0.0554818	0.792519	4228	124	0.793
TARDBP	seq.12046.51	1.11321	0.97628	1.26935	0.10926	0.998072	4567	172	1.0674	0.908681	1.25384	0.427132	0.999831	4542	145	1.19507	1.04522	1.36642	0.00913445	0.794457	4252	150	1.14234	0.960845	1.35812	0.131675	0.801521	4228	124	0.794
CDH8	seq.16021.30	1.18732	1.0192	1.38316	0.0275109	0.998072	4567	172	1.0904	0.928069	1.28113	0.292651	0.999831	4542	145	1.23484	1.05996	1.43858	0.00678127	0.794457	4252	150	1.13317	0.960729	1.33656	0.137719	0.801521	4228	124	0.794
STAT5A	seq.20225.119	1.1869	0.989086	1.42427	0.0654725	0.998072	4567	172	1.1245	0.923062	1.3699	0.243989	0.999831	4542	145	1.28657	1.06794	1.54996	0.00800737	0.794457	4252	150	1.22116	0.991306	1.5043	0.0603914	0.801124	4228	124	0.794
FAM174A	seq.6597.24	1.21513	1.05822	1.39529	0.00573956	0.800321	4567	172	1.10054	0.936767	1.29294	0.243861	0.999831	4542	145	1.21372	1.05111	1.40148	0.00831154	0.794457	4252	150	1.08324	0.910108	1.28931	0.368176	0.851458	4228	124	0.794
LTB4R	seq.13477.65	1.04354	0.770718	1.41294	0.782813	0.998072	4567	172	1.12999	0.829398	1.53951	0.438636	0.999831	4542	145	1.11138	0.839904	1.47061	0.459885	0.998408	4252	150	1.28536	0.993748	1.66254	0.0558466	0.794615	4228	124	0.795
HS6ST3	seq.18896.23	0.916896	0.77733	1.08152	0.3031	0.998072	4567	172	0.854871	0.706867	1.03386	0.105956	0.999831	4542	145	0.862456	0.702608	1.05867	0.157114	0.998408	4252	150	0.789494	0.619676	1.00585	0.0557726	0.794615	4228	124	0.795
TMEM190	seq.10442.1	0.840295	0.714502	0.988235	0.035462	0.998072	4567	172	0.848214	0.710942	1.01199	0.0676002	0.999831	4542	145	0.827156	0.686379	0.996806	0.0461943	0.92329	4252	150	0.817139	0.664043	1.00553	0.0564058	0.797497	4228	124	0.797
LRIG3	seq.3322.52	0.853045	0.689355	1.0556	0.14369	0.998072	4567	172	0.802916	0.642879	1.00279	0.0529386	0.999831	4542	145	0.85357	0.679629	1.07203	0.173268	0.998408	4252	150	0.788929	0.618503	1.00632	0.0562241	0.797497	4228	124	0.797
EPHA3	seq.3432.21	0.885122	0.759137	1.03201	0.119294	0.998072	4567	172	0.860569	0.725646	1.02058	0.0843701	0.999831	4542	145	0.858332	0.725033	1.01614	0.0760529	0.969964	4252	150	0.825768	0.678316	1.00527	0.0564441	0.797497	4228	124	0.797
NRG2	seq.8060.7	1.10205	0.945514	1.28449	0.213799	0.998072	4567	172	1.13281	0.962678	1.33302	0.133123	0.999831	4542	145	1.12465	0.967495	1.30733	0.126093	0.998408	4252	150	1.16499	0.995786	1.36294	0.0564871	0.797497	4228	124	0.797
EGFLAM	seq.12338.27	0.991677	0.808489	1.21637	0.936074	0.998072	4567	172	0.862421	0.704897	1.05515	0.150334	0.999831	4542	145	0.903905	0.725638	1.12597	0.367361	0.998408	4252	150	0.800794	0.637249	1.00631	0.0566471	0.79821	4228	124	0.798
IL31	seq.10455.196	0.910626	0.780239	1.0628	0.235046	0.998072	4567	172	0.917123	0.785308	1.07106	0.274481	0.999831	4542	145	0.836559	0.6946	1.00753	0.0599833	0.931253	4252	150	0.827806	0.675006	1.01519	0.069501	0.801124	4228	124	0.801
CSF1	seq.10741.22	1.19981	1.01896	1.41276	0.0288613	0.998072	4567	172	1.14651	0.970864	1.35392	0.107075	0.999831	4542	145	1.23528	1.03702	1.47144	0.0179199	0.857608	4252	150	1.18301	0.988114	1.41634	0.067279	0.801124	4228	124	0.801
CALN1	seq.10933.107	1.00043	0.861318	1.162	0.995543	0.999036	4567	172	0.886043	0.747095	1.05083	0.164451	0.999831	4542	145	0.98014	0.83247	1.15401	0.809734	0.998408	4252	150	0.837618	0.692908	1.01255	0.0670828	0.801124	4228	124	0.801
SORT1	seq.11300.32	0.851251	0.723697	1.00129	0.0518392	0.998072	4567	172	0.847843	0.711432	1.01041	0.0651399	0.999831	4542	145	0.823306	0.679492	0.997559	0.0471497	0.92329	4252	150	0.820849	0.666498	1.01095	0.0632313	0.801124	4228	124	0.801
APOA5	seq.11318.20	0.888665	0.745299	1.05961	0.18852	0.998072	4567	172	0.825851	0.675587	1.00954	0.0618511	0.999831	4542	145	0.865264	0.720099	1.03969	0.12245	0.998408	4252	150	0.821181	0.667314	1.01052	0.0627306	0.801124	4228	124	0.801
KMT2C	seq.11402.17	0.811487	0.662859	0.993442	0.042996	0.998072	4567	172	0.800063	0.623615	1.02644	0.0793028	0.999831	4542	145	0.783249	0.632518	0.969901	0.0250749	0.857608	4252	150	0.782349	0.599525	1.02092	0.070683	0.801124	4228	124	0.801
HMBS	seq.11530.37	1.05321	0.868309	1.27748	0.598659	0.998072	4567	172	1.14067	0.942248	1.38087	0.177056	0.999831	4542	145	1.10577	0.902383	1.35501	0.332281	0.998408	4252	150	1.20991	0.986113	1.4845	0.0678513	0.801124	4228	124	0.801
MUSK	seq.11547.84	1.06805	0.891965	1.27889	0.473861	0.998072	4567	172	1.11935	0.934517	1.34074	0.220772	0.999831	4542	145	1.13205	0.949397	1.34985	0.167102	0.998408	4252	150	1.17637	0.986617	1.40261	0.0703158	0.801124	4228	124	0.801
NFATC4	seq.11560.76	0.952564	0.836195	1.08513	0.464747	0.998072	4567	172	0.863966	0.732866	1.01852	0.0816013	0.999831	4542	145	0.939711	0.811682	1.08794	0.405335	0.998408	4252	150	0.842404	0.702883	1.00962	0.0634016	0.801124	4228	124	0.801
SMAD4	seq.12022.12	1.04306	0.845437	1.28687	0.694056	0.998072	4567	172	1.10173	0.883625	1.37366	0.389381	0.999831	4542	145	1.14803	0.942113	1.39896	0.171074	0.998408	4252	150	1.21749	0.990279	1.49683	0.0618589	0.801124	4228	124	0.801
PSMA7	seq.12460.18	1.03626	0.833642	1.28813	0.748291	0.998072	4567	172	1.15048	0.923148	1.43379	0.212014	0.999831	4542	145	1.10818	0.881322	1.39343	0.379422	0.998408	4252	150	1.24953	0.988324	1.57978	0.0626254	0.801124	4228	124	0.801
NRBP1	seq.12616.45	1.07016	0.836943	1.36835	0.588744	0.998072	4567	172	1.10364	0.865759	1.40689	0.425922	0.999831	4542	145	1.16334	0.903893	1.49727	0.239928	0.998408	4252	150	1.25643	0.988614	1.59679	0.0619891	0.801124	4228	124	0.801
CDC42BPA	seq.12706.2	1.09421	0.906246	1.32116	0.349137	0.998072	4567	172	1.14204	0.938991	1.389	0.183598	0.999831	4542	145	1.1136	0.920197	1.34765	0.268941	0.998408	4252	150	1.19353	0.985505	1.44547	0.0702065	0.801124	4228	124	0.801
CIRBP	seq.12724.81	1.02172	0.747491	1.39656	0.892799	0.998072	4567	172	1.20158	0.874404	1.65118	0.25747	0.999831	4542	145	1.11537	0.808424	1.53886	0.506109	0.998408	4252	150	1.33421	0.97697	1.82208	0.0697602	0.801124	4228	124	0.801
FBXL5	seq.12846.3	0.927482	0.773768	1.11173	0.415468	0.998072	4567	172	0.839897	0.682629	1.0334	0.0990616	0.999831	4542	145	0.866742	0.719451	1.04419	0.13233	0.998408	4252	150	0.815054	0.657408	1.0105	0.0622192	0.801124	4228	124	0.801
RFK	seq.13059.33	1.02474	0.839449	1.25094	0.810171	0.998072	4567	172	1.11088	0.912689	1.3521	0.294283	0.999831	4542	145	1.10684	0.911676	1.34378	0.305051	0.998408	4252	150	1.19645	0.98634	1.45133	0.0686978	0.801124	4228	124	0.801
DEFB4A	seq.13397.88	1.14926	0.963766	1.37044	0.121373	0.998072	4567	172	1.11941	0.920482	1.36132	0.258491	0.999831	4542	145	1.23012	1.02446	1.47706	0.026494	0.865511	4252	150	1.21187	0.986696	1.48844	0.0669075	0.801124	4228	124	0.801
RCAN1	seq.13465.5	1.1474	0.994731	1.3235	0.059096	0.998072	4567	172	1.15225	0.990421	1.34051	0.0664542	0.999831	4542	145	1.15574	0.987986	1.35198	0.0704597	0.951571	4252	150	1.16948	0.990058	1.38142	0.0654149	0.801124	4228	124	0.801
TMEM87B	seq.13485.20	1.12361	0.969065	1.3028	0.122646	0.998072	4567	172	1.14707	0.973899	1.35102	0.100332	0.999831	4542	145	1.15063	0.985232	1.34378	0.0763812	0.969964	4252	150	1.1695	0.986731	1.38611	0.07093	0.801124	4228	124	0.801
SCAMP5	seq.13509.5	0.903175	0.765511	1.0656	0.227435	0.998072	4567	172	0.869549	0.716036	1.05598	0.158412	0.999831	4542	145	0.804494	0.65578	0.986932	0.0369653	0.922233	4252	150	0.799567	0.630288	1.01431	0.0653371	0.801124	4228	124	0.801
THTPA	seq.13595.20	0.952067	0.821029	1.10402	0.515583	0.998072	4567	172	0.932542	0.780538	1.11415	0.441696	0.999831	4542	145	0.848661	0.718413	1.00252	0.0535637	0.926196	4252	150	0.825438	0.676099	1.00776	0.0595596	0.801124	4228	124	0.801
CCT7	seq.13673.21	1.09601	0.903783	1.32911	0.351462	0.998072	4567	172	1.1712	0.956068	1.43475	0.126975	0.999831	4542	145	1.11145	0.898043	1.37558	0.331347	0.998408	4252	150	1.23837	0.985782	1.55569	0.0662153	0.801124	4228	124	0.801
SERPINA4	seq.14105.5	0.851838	0.735032	0.987207	0.0330804	0.998072	4567	172	0.881044	0.752504	1.03154	0.115477	0.999831	4542	145	0.816146	0.694684	0.958844	0.0134662	0.85496	4252	150	0.851697	0.716142	1.01291	0.0695307	0.801124	4228	124	0.801
PACSIN3	seq.14674.63	1.01286	0.875833	1.17133	0.863204	0.998072	4567	172	1.06669	0.924773	1.23039	0.375442	0.999831	4542	145	1.08283	0.939264	1.24834	0.272824	0.998408	4252	150	1.14152	0.995186	1.30937	0.0586163	0.801124	4228	124	0.801
S100A3	seq.15297.3	1.10631	0.95493	1.28169	0.178393	0.998072	4567	172	1.1189	0.954209	1.31202	0.166663	0.999831	4542	145	1.14943	0.988049	1.33716	0.0711936	0.957162	4252	150	1.16463	0.989962	1.37012	0.0660173	0.801124	4228	124	0.801
AGO1	seq.15312.14	0.999757	0.743027	1.34519	0.998721	0.999657	4567	172	1.19651	0.911344	1.57091	0.19648	0.999831	4542	145	1.0478	0.784528	1.39943	0.751786	0.998408	4252	150	1.26968	0.983174	1.63967	0.0672585	0.801124	4228	124	0.801
CD8A	seq.15462.28	1.1197	0.956868	1.31023	0.158511	0.998072	4567	172	1.19168	1.00683	1.41045	0.0414301	0.999831	4542	145	1.11555	0.93959	1.32445	0.211841	0.998408	4252	150	1.19201	0.98548	1.44182	0.0704003	0.801124	4228	124	0.801
NODAL	seq.15692.300	0.938481	0.779514	1.12987	0.502523	0.998072	4567	172	0.876441	0.723829	1.06123	0.176646	0.999831	4542	145	0.892538	0.72431	1.09984	0.286009	0.998408	4252	150	0.814296	0.656823	1.00952	0.0609898	0.801124	4228	124	0.801
NMRK1	seq.16853.5	0.790619	0.634989	0.984393	0.035672	0.998072	4567	172	0.780049	0.612995	0.99263	0.0433663	0.999831	4542	145	0.770317	0.614203	0.966112	0.0239228	0.857608	4252	150	0.800612	0.634636	1.01	0.0606444	0.801124	4228	124	0.801
PHPT1	seq.16882.27	0.98862	0.799147	1.22302	0.91603	0.998072	4567	172	1.134	0.926423	1.38808	0.22281	0.999831	4542	145	1.05555	0.835304	1.33386	0.650724	0.998408	4252	150	1.23739	0.985123	1.55426	0.0670791	0.801124	4228	124	0.801
MDGA1	seq.16900.29	0.893443	0.762819	1.04644	0.162365	0.998072	4567	172	0.865419	0.730427	1.02536	0.094809	0.999831	4542	145	0.875656	0.738144	1.03879	0.127655	0.998408	4252	150	0.840359	0.700178	1.0086	0.061764	0.801124	4228	124	0.801
KYAT1	seq.17365.7	1.11712	0.96322	1.29561	0.14306	0.998072	4567	172	1.10721	0.940169	1.30394	0.222235	0.999831	4542	145	1.1677	1.00484	1.35696	0.0430754	0.92329	4252	150	1.16577	0.987474	1.37627	0.0701161	0.801124	4228	124	0.801
CD160	seq.17677.47	1.19063	1.0121	1.40066	0.0352865	0.998072	4567	172	1.14942	0.965287	1.36867	0.117967	0.999831	4542	145	1.23946	1.04682	1.46755	0.0127419	0.85496	4252	150	1.1916	0.990601	1.43338	0.0629121	0.801124	4228	124	0.801
PNPO	seq.17804.102	1.06678	0.875126	1.3004	0.522299	0.998072	4567	172	1.09904	0.894669	1.3501	0.368296	0.999831	4542	145	1.17201	0.972262	1.41279	0.095928	0.998408	4252	150	1.21393	0.993898	1.48268	0.0574315	0.801124	4228	124	0.801
PPME1	seq.17852.5	0.991674	0.768663	1.27939	0.948711	0.998072	4567	172	1.13516	0.882305	1.46049	0.324101	0.999831	4542	145	1.09463	0.838883	1.42834	0.505434	0.998408	4252	150	1.26934	0.980135	1.64388	0.0706226	0.801124	4228	124	0.801
RGS4	seq.17855.28	0.988834	0.869777	1.12419	0.86379	0.998072	4567	172	0.936003	0.792228	1.10587	0.436993	0.999831	4542	145	0.898697	0.766419	1.05381	0.188564	0.998408	4252	150	0.805974	0.641922	1.01195	0.0632156	0.801124	4228	124	0.801
GMPS	seq.18184.28	0.985659	0.725364	1.33936	0.926435	0.998072	4567	172	1.19253	0.882352	1.61174	0.25195	0.999831	4542	145	1.08068	0.781123	1.49512	0.639426	0.998408	4252	150	1.33598	0.975642	1.82941	0.0708818	0.801124	4228	124	0.801
RANBP1	seq.18191.23	0.959326	0.752912	1.22233	0.736928	0.998072	4567	172	1.08276	0.863024	1.35843	0.492052	0.999831	4542	145	1.08448	0.853156	1.37853	0.507599	0.998408	4252	150	1.23049	0.984447	1.53802	0.0684128	0.801124	4228	124	0.801
TCEA1	seq.18204.1	1.01592	0.827187	1.24772	0.880265	0.998072	4567	172	1.18272	0.966724	1.44699	0.102873	0.999831	4542	145	1.05628	0.842963	1.32357	0.634276	0.998408	4252	150	1.24102	0.987591	1.55948	0.0639035	0.801124	4228	124	0.801
OXSM	seq.18271.43	1.18716	0.924195	1.52494	0.179296	0.998072	4567	172	1.25823	0.954406	1.65878	0.103302	0.999831	4542	145	1.20534	0.924574	1.57137	0.16747	0.998408	4252	150	1.29627	0.979684	1.71517	0.0693195	0.801124	4228	124	0.801
DCTN6	seq.18311.44	1.1148	0.911688	1.36317	0.289587	0.998072	4567	172	1.16512	0.919291	1.47667	0.206239	0.999831	4542	145	1.19004	0.964486	1.46833	0.104645	0.998408	4252	150	1.26762	0.991817	1.62011	0.0581771	0.801124	4228	124	0.801
ASRGL1	seq.18313.4	0.91193	0.786968	1.05673	0.220164	0.998072	4567	172	0.899939	0.765987	1.05732	0.199775	0.999831	4542	145	0.850201	0.708598	1.0201	0.0808294	0.980121	4252	150	0.823201	0.668795	1.01326	0.0663945	0.801124	4228	124	0.801
ALB	seq.18380.78	0.900312	0.762867	1.06252	0.214061	0.998072	4567	172	0.853355	0.707773	1.02888	0.0965831	0.999831	4542	145	0.846117	0.691475	1.03534	0.104653	0.998408	4252	150	0.795986	0.628642	1.00788	0.0581126	0.801124	4228	124	0.801
ITGAV|ITGB6	seq.20189.28	1.17427	1.02984	1.33895	0.0164325	0.912791	4567	172	1.15089	1.00727	1.31497	0.0387731	0.999831	4542	145	1.16588	1.00829	1.34809	0.0383161	0.92329	4252	150	1.14365	0.989739	1.3215	0.0687366	0.801124	4228	124	0.801
MRPL1	seq.20433.19	1.0701	0.785565	1.45768	0.667496	0.998072	4567	172	1.17666	0.842288	1.64377	0.340208	0.999831	4542	145	1.21796	0.878191	1.68919	0.237359	0.998408	4252	150	1.36995	0.974288	1.9263	0.0702644	0.801124	4228	124	0.801
TNFRSF25	seq.20518.11	1.11399	0.982805	1.26268	0.0912833	0.998072	4567	172	1.11919	0.971889	1.28881	0.117826	0.999831	4542	145	1.14189	1.00071	1.30299	0.0487681	0.92329	4252	150	1.15365	0.993233	1.33997	0.0613296	0.801124	4228	124	0.801
SNRNP25	seq.20982.29	1.15352	1.01204	1.31477	0.0324083	0.998072	4567	172	1.13758	0.985333	1.31335	0.0786735	0.999831	4542	145	1.15996	1.0112	1.3306	0.0340823	0.886748	4252	150	1.14755	0.989665	1.33063	0.0683891	0.801124	4228	124	0.801
GFPT1	seq.21126.27	1.04053	0.851167	1.27203	0.698248	0.998072	4567	172	1.10142	0.898185	1.35063	0.353305	0.999831	4542	145	1.10708	0.911559	1.34454	0.304873	0.998408	4252	150	1.19334	0.98801	1.44134	0.0665373	0.801124	4228	124	0.801
TBCEL	seq.21162.30	1.00252	0.800974	1.25477	0.982499	0.998072	4567	172	1.14512	0.916507	1.43076	0.233	0.999831	4542	145	1.08167	0.850347	1.37593	0.522498	0.998408	4252	150	1.25294	0.983218	1.59666	0.0682784	0.801124	4228	124	0.801
CAMK2N2	seq.21281.13	1.13088	0.920444	1.38943	0.24166	0.998072	4567	172	1.13632	0.913701	1.41317	0.25067	0.999831	4542	145	1.23952	1.0077	1.52467	0.0420882	0.92329	4252	150	1.23533	0.991293	1.53943	0.0598207	0.801124	4228	124	0.801
PNPT1	seq.21378.7	1.04726	0.787015	1.39355	0.751408	0.998072	4567	172	1.16047	0.863642	1.5593	0.323457	0.999831	4542	145	1.1693	0.857507	1.59445	0.322929	0.998408	4252	150	1.34526	0.985106	1.8371	0.0620961	0.801124	4228	124	0.801
RPL26L1	seq.21583.14	1.0606	0.853354	1.31818	0.595826	0.998072	4567	172	1.25344	0.994579	1.57966	0.0556275	0.999831	4542	145	1.07212	0.847246	1.35669	0.562028	0.998408	4252	150	1.26895	0.980778	1.6418	0.0699363	0.801124	4228	124	0.801
PHB2	seq.21658.15	1.14001	0.981858	1.32364	0.0854826	0.998072	4567	172	1.16473	0.984329	1.37819	0.0757266	0.999831	4542	145	1.17075	1.00316	1.36634	0.0455024	0.92329	4252	150	1.18471	0.988464	1.41993	0.06659	0.801124	4228	124	0.801
CD8A|CD8B	seq.21692.12	0.962978	0.816215	1.13613	0.654752	0.998072	4567	172	0.867901	0.713862	1.05518	0.155256	0.999831	4542	145	0.884369	0.713215	1.0966	0.262825	0.998408	4252	150	0.780131	0.601368	1.01203	0.0614957	0.801124	4228	124	0.801
UBE2Q2	seq.21717.44	0.935012	0.708312	1.23427	0.635281	0.998072	4567	172	1.05183	0.813114	1.36063	0.700417	0.999831	4542	145	1.07457	0.830184	1.39089	0.584866	0.998408	4252	150	1.23383	0.98835	1.54029	0.0633864	0.801124	4228	124	0.801
WNT16	seq.21943.170	0.842855	0.700634	1.01395	0.0698124	0.998072	4567	172	0.863967	0.706946	1.05586	0.153054	0.999831	4542	145	0.782134	0.62688	0.975838	0.0295063	0.879255	4252	150	0.798819	0.626254	1.01894	0.070462	0.801124	4228	124	0.801
PALMD	seq.22059.56	0.850606	0.714554	1.01256	0.0688201	0.998072	4567	172	0.838962	0.70345	1.00058	0.0507545	0.999831	4542	145	0.844956	0.69787	1.02304	0.0842514	0.983043	4252	150	0.835061	0.690164	1.01038	0.0637654	0.801124	4228	124	0.801
TGFBR1	seq.22569.55	0.941651	0.804369	1.10236	0.454584	0.998072	4567	172	0.884109	0.737411	1.05999	0.183309	0.999831	4542	145	0.885877	0.739533	1.06118	0.188376	0.998408	4252	150	0.813549	0.656277	1.00851	0.0597435	0.801124	4228	124	0.801
TRIM54	seq.22816.4	1.04365	0.889605	1.22436	0.600061	0.998072	4567	172	1.1039	0.934117	1.30454	0.246002	0.999831	4542	145	1.09481	0.914045	1.31132	0.325199	0.998408	4252	150	1.19729	0.990567	1.44715	0.0626041	0.801124	4228	124	0.801
RAB37	seq.23282.19	0.840925	0.702484	1.00665	0.0590553	0.998072	4567	172	0.822758	0.671861	1.00755	0.059123	0.999831	4542	145	0.811569	0.659412	0.998835	0.0487233	0.92329	4252	150	0.799217	0.634092	1.00734	0.0576894	0.801124	4228	124	0.801
KCTD2	seq.23285.51	1.09475	0.950394	1.26103	0.209561	0.998072	4567	172	1.11228	0.95832	1.29097	0.161541	0.999831	4542	145	1.1386	0.972756	1.33271	0.106076	0.998408	4252	150	1.17026	0.991764	1.38089	0.0625953	0.801124	4228	124	0.801
NT5C1A	seq.23362.26	1.13505	0.967968	1.33096	0.118937	0.998072	4567	172	1.10314	0.926264	1.31379	0.270926	0.999831	4542	145	1.20928	1.02778	1.42283	0.0220052	0.857608	4252	150	1.18348	0.993803	1.40936	0.0587251	0.801124	4228	124	0.801
PCBP2	seq.23363.41	1.03796	0.767078	1.4045	0.809189	0.998072	4567	172	1.24999	0.906742	1.72318	0.173101	0.999831	4542	145	1.11775	0.812915	1.5369	0.493243	0.998408	4252	150	1.3571	0.977378	1.88436	0.0682483	0.801124	4228	124	0.801
CEP41	seq.23560.154	1.0672	0.823552	1.38294	0.622807	0.998072	4567	172	1.16743	0.888889	1.53324	0.265671	0.999831	4542	145	1.1549	0.883476	1.5097	0.292068	0.998408	4252	150	1.28823	0.98173	1.69041	0.0677018	0.801124	4228	124	0.801
GALK2	seq.23631.1	1.10309	0.903814	1.3463	0.334467	0.998072	4567	172	1.11829	0.901836	1.38669	0.308382	0.999831	4542	145	1.19694	0.973019	1.4724	0.088911	0.986413	4252	150	1.23369	0.985635	1.54418	0.0667035	0.801124	4228	124	0.801
HACL1	seq.23645.49	1.10607	0.955972	1.27973	0.175461	0.998072	4567	172	1.13548	0.975695	1.32142	0.100588	0.999831	4542	145	1.13605	0.983356	1.31244	0.0832588	0.983043	4252	150	1.15603	0.992565	1.34641	0.0623136	0.801124	4228	124	0.801
PSMD6	seq.23672.10	1.03903	0.849619	1.27067	0.709235	0.998072	4567	172	1.12052	0.910915	1.37837	0.281499	0.999831	4542	145	1.09771	0.886748	1.35885	0.391912	0.998408	4252	150	1.21285	0.985156	1.49317	0.0689076	0.801124	4228	124	0.801
PHYHIP	seq.24434.16	0.946279	0.813012	1.10139	0.475842	0.998072	4567	172	0.875634	0.754934	1.01563	0.0792565	0.999831	4542	145	0.943887	0.798733	1.11542	0.497861	0.998408	4252	150	0.855772	0.725101	1.00999	0.0654184	0.801124	4228	124	0.801
FAM221A	seq.24447.26	1.08712	0.901133	1.3115	0.382893	0.998072	4567	172	1.1206	0.926741	1.35501	0.240021	0.999831	4542	145	1.13959	0.94736	1.37083	0.165657	0.998408	4252	150	1.18977	0.994207	1.4238	0.0578826	0.801124	4228	124	0.801
CNGB1	seq.24462.4	0.814551	0.671191	0.988532	0.0378219	0.998072	4567	172	0.81073	0.65124	1.00928	0.0604691	0.999831	4542	145	0.764156	0.608878	0.959033	0.0202904	0.857608	4252	150	0.786892	0.607494	1.01927	0.0694573	0.801124	4228	124	0.801
CXorf38	seq.24707.6	0.986622	0.717406	1.35686	0.933975	0.998072	4567	172	1.16995	0.855762	1.5995	0.325231	0.999831	4542	145	1.10489	0.786062	1.55303	0.565828	0.998408	4252	150	1.35955	0.980737	1.88468	0.0652893	0.801124	4228	124	0.801
EIF2S2	seq.24723.58	0.994617	0.7068	1.39964	0.975297	0.998072	4567	172	1.17931	0.837544	1.66053	0.344851	0.999831	4542	145	1.11817	0.792003	1.57865	0.525594	0.998408	4252	150	1.36133	0.990456	1.87109	0.057315	0.801124	4228	124	0.801
ATG4C	seq.25078.13	1.11513	0.885582	1.40418	0.35409	0.998072	4567	172	1.13608	0.885979	1.45679	0.314552	0.999831	4542	145	1.20402	0.982838	1.47498	0.0729981	0.966893	4252	150	1.22822	0.987777	1.5272	0.0644055	0.801124	4228	124	0.801
CADPS2	seq.25099.4	1.10409	0.937444	1.30036	0.235551	0.998072	4567	172	1.13858	0.97714	1.32669	0.0961991	0.999831	4542	145	1.09263	0.912882	1.30777	0.33403	0.998408	4252	150	1.15858	0.990728	1.35486	0.0652795	0.801124	4228	124	0.801
SPANXA1	seq.25217.35	0.871008	0.721112	1.05206	0.151776	0.998072	4567	172	0.804076	0.643141	1.00528	0.0556507	0.999831	4542	145	0.883621	0.729965	1.06962	0.204281	0.998408	4252	150	0.802315	0.63453	1.01447	0.0657651	0.801124	4228	124	0.801
ALOX5	seq.25880.14	0.96806	0.820164	1.14263	0.701152	0.998072	4567	172	0.928165	0.759419	1.13441	0.466515	0.999831	4542	145	0.886195	0.73779	1.06445	0.196337	0.998408	4252	150	0.819389	0.660398	1.01666	0.0703116	0.801124	4228	124	0.801
PIK3C3	seq.25947.116	1.07806	0.935626	1.24218	0.298508	0.998072	4567	172	1.09948	0.953264	1.26811	0.19272	0.999831	4542	145	1.10988	0.949014	1.29801	0.191913	0.998408	4252	150	1.15846	0.993161	1.35126	0.0611188	0.801124	4228	124	0.801
CNTN1	seq.2974.61	0.939026	0.771004	1.14366	0.531672	0.998072	4567	172	0.836935	0.68535	1.02205	0.0807968	0.999831	4542	145	0.921475	0.731814	1.16029	0.486712	0.998408	4252	150	0.793042	0.623286	1.00903	0.059183	0.801124	4228	124	0.801
CGA|FSHB	seq.3032.11	0.840356	0.624461	1.13089	0.250944	0.998072	4567	172	0.772697	0.548589	1.08836	0.140072	0.999831	4542	145	0.809106	0.58127	1.12625	0.209337	0.998408	4252	150	0.697195	0.478108	1.01667	0.0609198	0.801124	4228	124	0.801
CTSC	seq.3178.5	0.956809	0.817037	1.12049	0.583708	0.998072	4567	172	0.909251	0.75568	1.09403	0.313505	0.999831	4542	145	0.916674	0.781756	1.07488	0.284129	0.998408	4252	150	0.841128	0.697574	1.01422	0.0699752	0.801124	4228	124	0.801
ASAH2	seq.3212.30	0.885284	0.741512	1.05693	0.177785	0.998072	4567	172	0.863775	0.711068	1.04928	0.140106	0.999831	4542	145	0.844311	0.691359	1.0311	0.0969852	0.998408	4252	150	0.809985	0.648327	1.01195	0.0635406	0.801124	4228	124	0.801
ACAN	seq.3280.49	0.909675	0.783766	1.05581	0.21295	0.998072	4567	172	0.887627	0.756163	1.04195	0.14496	0.999831	4542	145	0.877111	0.743754	1.03438	0.119161	0.998408	4252	150	0.839102	0.698957	1.00735	0.0599057	0.801124	4228	124	0.801
SERPINC1	seq.3344.60	0.947399	0.800573	1.12115	0.529389	0.998072	4567	172	0.917183	0.777013	1.08264	0.30695	0.999831	4542	145	0.881251	0.721122	1.07694	0.216625	0.998408	4252	150	0.822782	0.669709	1.01084	0.063266	0.801124	4228	124	0.801
PIK3CA|PIK3R1	seq.3390.72	1.03809	0.828651	1.30048	0.74504	0.998072	4567	172	1.08046	0.859782	1.35779	0.506739	0.999831	4542	145	1.14195	0.947199	1.37675	0.164108	0.998408	4252	150	1.19713	0.993125	1.44304	0.0590758	0.801124	4228	124	0.801
LCORL	seq.4304.18	0.891541	0.753459	1.05493	0.181164	0.998072	4567	172	0.861618	0.707472	1.04935	0.138603	0.999831	4542	145	0.8225	0.663646	1.01938	0.0743087	0.967287	4252	150	0.774103	0.589648	1.01626	0.0652057	0.801124	4228	124	0.801
SERPING1	seq.4479.14	0.895693	0.750326	1.06922	0.222768	0.998072	4567	172	0.871829	0.722705	1.05172	0.151829	0.999831	4542	145	0.878312	0.724337	1.06502	0.187024	0.998408	4252	150	0.82855	0.675822	1.01579	0.0704097	0.801124	4228	124	0.801
PLXNC1	seq.4564.2	0.917921	0.770941	1.09292	0.336071	0.998072	4567	172	0.851607	0.713379	1.01662	0.0754724	0.999831	4542	145	0.904838	0.751432	1.08956	0.291414	0.998408	4252	150	0.832308	0.688975	1.00546	0.0569708	0.801124	4228	124	0.801
ITGAV|ITGB5	seq.4917.62	0.935954	0.778492	1.12526	0.481268	0.998072	4567	172	0.829197	0.643175	1.06902	0.148442	0.999831	4542	145	0.90543	0.751629	1.0907	0.295591	0.998408	4252	150	0.779659	0.602926	1.0082	0.057729	0.801124	4228	124	0.801
PPID	seq.5202.4	1.00746	0.754566	1.34512	0.9598	0.998072	4567	172	1.17433	0.856289	1.61048	0.318662	0.999831	4542	145	1.13361	0.827028	1.55384	0.435682	0.998408	4252	150	1.35573	0.975914	1.88336	0.0695813	0.801124	4228	124	0.801
CSNK2A2|CSNK2B	seq.5226.36	1.02311	0.841735	1.24357	0.81848	0.998072	4567	172	1.11742	0.924054	1.35125	0.252111	0.999831	4542	145	1.06767	0.882658	1.29147	0.500037	0.998408	4252	150	1.18014	0.987785	1.40994	0.0680606	0.801124	4228	124	0.801
COLGALT1	seq.5638.23	1.16486	0.999159	1.35803	0.0512656	0.998072	4567	172	1.13975	0.95408	1.36155	0.149345	0.999831	4542	145	1.21786	1.04113	1.4246	0.0137457	0.85496	4252	150	1.19166	0.991043	1.43289	0.0622736	0.801124	4228	124	0.801
LETMD1	seq.5751.14	0.947141	0.817047	1.09795	0.471265	0.998072	4567	172	0.92374	0.783515	1.08906	0.344995	0.999831	4542	145	0.88164	0.759827	1.02298	0.096814	0.998408	4252	150	0.852989	0.722741	1.00671	0.0599843	0.801124	4228	124	0.801
TDGF1	seq.5810.25	0.860578	0.736481	1.00559	0.0587729	0.998072	4567	172	0.874252	0.737934	1.03575	0.120221	0.999831	4542	145	0.817088	0.687582	0.970986	0.0217669	0.857608	4252	150	0.834009	0.689943	1.00816	0.0606501	0.801124	4228	124	0.801
EIF5A	seq.5888.29	1.00773	0.754133	1.34661	0.958474	0.998072	4567	172	1.18888	0.884141	1.59866	0.252191	0.999831	4542	145	1.11184	0.817488	1.51218	0.499246	0.998408	4252	150	1.33987	0.990756	1.812	0.0574729	0.801124	4228	124	0.801
PDZD11	seq.6219.14	0.938886	0.79931	1.10283	0.442503	0.998072	4567	172	0.864734	0.720305	1.03812	0.119058	0.999831	4542	145	0.876383	0.714229	1.07535	0.206209	0.998408	4252	150	0.808546	0.642174	1.01802	0.0705988	0.801124	4228	124	0.801
CFHR4	seq.6471.53	0.899861	0.772144	1.0487	0.176671	0.998072	4567	172	0.881714	0.74957	1.03715	0.128604	0.999831	4542	145	0.879471	0.746729	1.03581	0.12392	0.998408	4252	150	0.851782	0.716683	1.01235	0.0686477	0.801124	4228	124	0.801
GDF10	seq.6517.14	0.847816	0.666211	1.07892	0.179486	0.998072	4567	172	0.794974	0.609026	1.0377	0.0914485	0.999831	4542	145	0.764927	0.582083	1.00521	0.0545118	0.926196	4252	150	0.74701	0.544379	1.02507	0.0708158	0.801124	4228	124	0.801
GHRL	seq.6518.85	1.04971	0.818916	1.34555	0.70174	0.998072	4567	172	1.18667	0.926235	1.52034	0.175782	0.999831	4542	145	1.09323	0.838123	1.42599	0.510877	0.998408	4252	150	1.27041	0.986094	1.6367	0.0640745	0.801124	4228	124	0.801
GALNT3	seq.6593.5	0.953711	0.805002	1.12989	0.583702	0.998072	4567	172	0.857937	0.711415	1.03464	0.108798	0.999831	4542	145	0.907877	0.744613	1.10694	0.339311	0.998408	4252	150	0.802942	0.638938	1.00904	0.059733	0.801124	4228	124	0.801
RAB26	seq.6997.32	0.886899	0.745507	1.05511	0.175544	0.998072	4567	172	0.844995	0.699734	1.02041	0.0801086	0.999831	4542	145	0.86635	0.71067	1.05613	0.155729	0.998408	4252	150	0.817914	0.658442	1.01601	0.0692975	0.801124	4228	124	0.801
NPTN	seq.7194.36	0.883821	0.735908	1.06147	0.186285	0.998072	4567	172	0.850529	0.69754	1.03707	0.109555	0.999831	4542	145	0.854172	0.681599	1.07044	0.171043	0.998408	4252	150	0.791065	0.618091	1.01245	0.0626386	0.801124	4228	124	0.801
LGMN	seq.7840.64	1.05341	0.81691	1.35838	0.688341	0.998072	4567	172	1.13835	0.876262	1.47882	0.331754	0.999831	4542	145	1.15053	0.890469	1.48655	0.283439	0.998408	4252	150	1.26988	0.985773	1.63587	0.0644434	0.801124	4228	124	0.801
FAM151A	seq.7856.51	0.940654	0.812743	1.0887	0.411981	0.998072	4567	172	0.905531	0.766909	1.06921	0.241764	0.999831	4542	145	0.876395	0.737494	1.04146	0.133972	0.998408	4252	150	0.830277	0.680292	1.01333	0.0672885	0.801124	4228	124	0.801
MIF	seq.8221.19	1.11365	0.922427	1.34453	0.262744	0.998072	4567	172	1.17474	0.970766	1.42156	0.0979081	0.999831	4542	145	1.15393	0.940417	1.41593	0.17021	0.998408	4252	150	1.2177	0.98658	1.50297	0.0666272	0.801124	4228	124	0.801
PAPOLG	seq.8343.224	1.0357	0.837258	1.28117	0.746533	0.998072	4567	172	1.08118	0.86814	1.34649	0.485743	0.999831	4542	145	1.14697	0.936999	1.40398	0.183783	0.998408	4252	150	1.2152	0.993265	1.48672	0.0581821	0.801124	4228	124	0.801
ERMAP	seq.8631.13	0.859862	0.728825	1.01446	0.0734814	0.998072	4567	172	0.862259	0.725039	1.02545	0.0937712	0.999831	4542	145	0.795339	0.655568	0.964909	0.0202188	0.857608	4252	150	0.828619	0.67643	1.01505	0.0694086	0.801124	4228	124	0.801
HIKESHI	seq.8686.342	0.962289	0.798158	1.16017	0.687032	0.998072	4567	172	0.873576	0.716578	1.06497	0.181152	0.999831	4542	145	0.886774	0.706876	1.11246	0.298916	0.998408	4252	150	0.796419	0.629758	1.00719	0.0574038	0.801124	4228	124	0.801
BCL10	seq.8768.4	1.07212	0.926893	1.24009	0.348401	0.998072	4567	172	1.10784	0.958949	1.27985	0.164298	0.999831	4542	145	1.104	0.95667	1.27402	0.175781	0.998408	4252	150	1.14249	0.990114	1.31832	0.0681582	0.801124	4228	124	0.801
DPEP1	seq.8794.13	0.93868	0.785128	1.12226	0.487461	0.998072	4567	172	0.823998	0.67509	1.00575	0.056962	0.999831	4542	145	0.922845	0.741768	1.14813	0.471214	0.998408	4252	150	0.799131	0.626538	1.01927	0.0708762	0.801124	4228	124	0.801
ESRP1	seq.8828.21	0.871218	0.694042	1.09362	0.234647	0.998072	4567	172	0.806217	0.610383	1.06488	0.129215	0.999831	4542	145	0.776837	0.595128	1.01403	0.0632337	0.940117	4252	150	0.72864	0.518169	1.0246	0.0687199	0.801124	4228	124	0.801
IL32	seq.9051.13	0.878819	0.662796	1.16525	0.369469	0.998072	4567	172	0.722926	0.48009	1.08859	0.120293	0.999831	4542	145	0.848168	0.622292	1.15603	0.297276	0.998408	4252	150	0.636229	0.394208	1.02684	0.0640892	0.801124	4228	124	0.801
NHLRC3	seq.9087.8	0.94225	0.804135	1.10409	0.461994	0.998072	4567	172	0.886741	0.736714	1.06732	0.203703	0.999831	4542	145	0.841419	0.708665	0.999042	0.0487309	0.92329	4252	150	0.822612	0.666069	1.01595	0.0698152	0.801124	4228	124	0.801
MICB	seq.9328.55	1.05081	0.916658	1.2046	0.476923	0.998072	4567	172	1.07831	0.931999	1.2476	0.310852	0.999831	4542	145	1.10667	0.96144	1.27383	0.157912	0.998408	4252	150	1.15458	0.991716	1.34419	0.063915	0.801124	4228	124	0.801
ACVR2B	seq.9412.52	0.849522	0.70635	1.02171	0.0832958	0.998072	4567	172	0.803262	0.631816	1.02123	0.0736963	0.999831	4542	145	0.805525	0.642188	1.01041	0.06142	0.938361	4252	150	0.749458	0.550503	1.02032	0.0669172	0.801124	4228	124	0.801
MNX1	seq.9576.58	0.953327	0.818954	1.10975	0.537482	0.998072	4567	172	0.912418	0.79075	1.05281	0.209389	0.999831	4542	145	0.85123	0.722578	1.00279	0.0540178	0.926196	4252	150	0.843007	0.703585	1.01006	0.0640938	0.801124	4228	124	0.801
CD96	seq.9735.44	1.11981	0.985459	1.27248	0.0826753	0.998072	4567	172	1.099	0.951311	1.26962	0.19981	0.999831	4542	145	1.16136	1.01682	1.32644	0.0273815	0.87466	4252	150	1.14792	0.988402	1.33319	0.0707343	0.801124	4228	124	0.801
AKR1B1	seq.9854.36	1.07268	0.813832	1.41387	0.618504	0.998072	4567	172	1.19261	0.894621	1.58985	0.229811	0.999831	4542	145	1.15062	0.86958	1.52248	0.326131	0.998408	4252	150	1.30171	0.984918	1.7204	0.0638542	0.801124	4228	124	0.801
LNX1	seq.9936.27	0.959212	0.816788	1.12647	0.611592	0.998072	4567	172	0.879109	0.735965	1.05009	0.155333	0.999831	4542	145	0.928804	0.783346	1.10127	0.395369	0.998408	4252	150	0.844074	0.703012	1.01344	0.0692297	0.801124	4228	124	0.801
BECN1	seq.10010.10	0.93212	0.80886	1.07416	0.33136	0.998072	4567	172	0.879575	0.728116	1.06254	0.183242	0.999831	4542	145	0.918083	0.78334	1.076	0.29124	0.998408	4252	150	0.877185	0.712089	1.08056	0.218052	0.801968	4228	124	0.802
HOGA1	seq.10024.44	0.954342	0.818662	1.11251	0.550311	0.998072	4567	172	0.94264	0.792938	1.12061	0.503195	0.999831	4542	145	0.90268	0.765069	1.06504	0.225024	0.998408	4252	150	0.884693	0.730433	1.07153	0.21011	0.801968	4228	124	0.802
MUTYH	seq.10030.8	0.904023	0.743473	1.09924	0.311797	0.998072	4567	172	0.855707	0.674241	1.08601	0.200032	0.999831	4542	145	0.82341	0.643083	1.0543	0.12339	0.998408	4252	150	0.782442	0.569705	1.07462	0.129655	0.801521	4228	124	0.802
PNP	seq.10039.32	1.01162	0.743114	1.37714	0.94149	0.998072	4567	172	1.17945	0.867809	1.603	0.291746	0.999831	4542	145	1.08359	0.775029	1.515	0.638702	0.998408	4252	150	1.28429	0.921449	1.79	0.139661	0.801968	4228	124	0.802
SGK3	seq.10042.8	0.915811	0.74822	1.12094	0.393738	0.998072	4567	172	0.90998	0.758842	1.09122	0.30869	0.999831	4542	145	0.882618	0.707948	1.10038	0.267093	0.998408	4252	150	0.869254	0.71264	1.06028	0.166832	0.801968	4228	124	0.802
BRD4	seq.10043.31	0.963735	0.837191	1.10941	0.607012	0.998072	4567	172	0.938182	0.802823	1.09636	0.422138	0.999831	4542	145	0.894556	0.760152	1.05272	0.179776	0.998408	4252	150	0.846336	0.700345	1.02276	0.0841609	0.801521	4228	124	0.802
CUL3	seq.10045.47	1.07157	0.88921	1.29132	0.46768	0.998072	4567	172	1.07932	0.898889	1.29596	0.413444	0.999831	4542	145	1.12061	0.93431	1.34405	0.219622	0.998408	4252	150	1.12721	0.936233	1.35714	0.206121	0.801968	4228	124	0.802
NCF2	seq.10047.12	0.812452	0.65046	1.01479	0.0671561	0.998072	4567	172	0.885817	0.720703	1.08876	0.249315	0.999831	4542	145	0.785149	0.61417	1.00373	0.0535671	0.926196	4252	150	0.857652	0.68021	1.08138	0.194144	0.801968	4228	124	0.802
GAN	seq.10054.3	0.910093	0.770959	1.07434	0.265737	0.998072	4567	172	0.859022	0.725406	1.01725	0.078116	0.999831	4542	145	0.923218	0.776139	1.09817	0.36689	0.998408	4252	150	0.867054	0.734034	1.02418	0.0931863	0.801521	4228	124	0.802
RAD23A	seq.10058.1	0.990513	0.782287	1.25417	0.936904	0.998072	4567	172	1.11855	0.891301	1.40375	0.333595	0.999831	4542	145	1.07082	0.834544	1.37399	0.590601	0.998408	4252	150	1.21708	0.953071	1.55422	0.115321	0.801521	4228	124	0.802
TDP1	seq.10073.22	0.869406	0.72793	1.03838	0.122493	0.998072	4567	172	0.921176	0.778856	1.0895	0.337615	0.999831	4542	145	0.821235	0.668461	1.00893	0.0607407	0.933536	4252	150	0.883499	0.728307	1.07176	0.208822	0.801968	4228	124	0.802
ACBD6	seq.10075.75	1.01284	0.749229	1.36921	0.933871	0.998072	4567	172	1.12404	0.829569	1.52304	0.450589	0.999831	4542	145	1.09042	0.795889	1.49394	0.589993	0.998408	4252	150	1.25392	0.933777	1.68382	0.132467	0.801521	4228	124	0.802
BAG3	seq.10078.5	0.99034	0.873464	1.12285	0.879578	0.998072	4567	172	0.901917	0.769501	1.05712	0.202552	0.999831	4542	145	0.952072	0.835241	1.08524	0.462162	0.998408	4252	150	0.865438	0.723447	1.0353	0.113968	0.801521	4228	124	0.802
STUB1	seq.10336.3	1.02458	0.841474	1.24754	0.80896	0.998072	4567	172	1.06684	0.875448	1.30007	0.521277	0.999831	4542	145	1.08372	0.904323	1.29871	0.383868	0.998408	4252	150	1.14616	0.967572	1.35772	0.11444	0.801521	4228	124	0.802
IL12A|IL12B	seq.10367.62	0.899673	0.723008	1.11951	0.343186	0.998072	4567	172	0.903265	0.713713	1.14316	0.397204	0.999831	4542	145	0.820669	0.627816	1.07276	0.148155	0.998408	4252	150	0.818092	0.601767	1.11218	0.200047	0.801968	4228	124	0.802
STAT1	seq.10370.21	0.991641	0.758997	1.29559	0.950932	0.998072	4567	172	1.15334	0.879442	1.51255	0.302391	0.999831	4542	145	1.04268	0.792205	1.37235	0.765573	0.998408	4252	150	1.23434	0.942079	1.61728	0.126712	0.801521	4228	124	0.802
ANGPTL3	seq.10382.1	1.14863	0.933315	1.41363	0.190742	0.998072	4567	172	1.20683	0.968798	1.50335	0.0935033	0.999831	4542	145	1.14826	0.91945	1.43401	0.222724	0.998408	4252	150	1.18703	0.936884	1.50397	0.155597	0.801968	4228	124	0.802
SCARA5	seq.10419.1	0.904995	0.737006	1.11127	0.340649	0.998072	4567	172	0.857179	0.683254	1.07538	0.182884	0.999831	4542	145	0.887292	0.707378	1.11297	0.301001	0.998408	4252	150	0.818363	0.63668	1.05189	0.117579	0.801521	4228	124	0.802
B4GALT5	seq.10425.3	0.947403	0.80953	1.10876	0.500718	0.998072	4567	172	0.945024	0.800405	1.11577	0.504602	0.999831	4542	145	0.901151	0.766628	1.05928	0.207009	0.998408	4252	150	0.885468	0.74272	1.05565	0.17504	0.801968	4228	124	0.802
GOSR2	seq.10426.21	1.13032	0.958123	1.33346	0.146312	0.998072	4567	172	1.07939	0.895624	1.30086	0.422371	0.999831	4542	145	1.18802	1.00727	1.40121	0.0407573	0.92329	4252	150	1.1456	0.947909	1.38451	0.15959	0.801968	4228	124	0.802
TXNDC11	seq.10470.34	1.11887	0.969462	1.29131	0.124561	0.998072	4567	172	1.08207	0.921988	1.26994	0.334233	0.999831	4542	145	1.15711	0.987966	1.35522	0.0703192	0.951571	4252	150	1.11421	0.938807	1.3224	0.215912	0.801968	4228	124	0.802
MMP10	seq.10479.18	1.07393	0.922288	1.2505	0.358437	0.998072	4567	172	1.08337	0.9238	1.2705	0.324616	0.999831	4542	145	1.12175	0.947216	1.32844	0.183021	0.998408	4252	150	1.11879	0.938017	1.33441	0.211894	0.801968	4228	124	0.802
CD59	seq.10480.33	1.04763	0.895892	1.22506	0.559996	0.998072	4567	172	1.07623	0.914445	1.26664	0.376745	0.999831	4542	145	1.09127	0.932684	1.27683	0.275628	0.998408	4252	150	1.1229	0.953298	1.32268	0.165288	0.801968	4228	124	0.802
KCNIP3	seq.10513.13	1.05972	0.909843	1.23429	0.45593	0.998072	4567	172	1.06906	0.911392	1.25401	0.412037	0.999831	4542	145	1.11031	0.958951	1.28556	0.161685	0.998408	4252	150	1.12328	0.965815	1.30641	0.131398	0.801521	4228	124	0.802
TEX29	seq.10557.6	0.992229	0.810388	1.21487	0.939789	0.998072	4567	172	1.14208	0.937406	1.39144	0.187339	0.999831	4542	145	0.995574	0.809561	1.22433	0.96647	0.998408	4252	150	1.15841	0.956915	1.40234	0.131482	0.801521	4228	124	0.802
ITM2C	seq.10560.1	1.0686	0.924746	1.23484	0.368416	0.998072	4567	172	1.07239	0.907474	1.26728	0.411998	0.999831	4542	145	1.10888	0.956598	1.28541	0.170288	0.998408	4252	150	1.11526	0.942624	1.31952	0.203597	0.801968	4228	124	0.802
PGLYRP3	seq.10561.5	0.929887	0.789313	1.0955	0.384684	0.998072	4567	172	0.864102	0.70361	1.0612	0.163516	0.999831	4542	145	0.939901	0.792302	1.115	0.477006	0.998408	4252	150	0.862979	0.694513	1.07231	0.183537	0.801968	4228	124	0.802
MFAP2	seq.10569.28	0.932243	0.792856	1.09614	0.395819	0.998072	4567	172	0.90773	0.751413	1.09657	0.315389	0.999831	4542	145	0.882181	0.738511	1.0538	0.166912	0.998408	4252	150	0.854159	0.697023	1.04672	0.128566	0.801521	4228	124	0.802
B2M	seq.10574.10	1.11694	0.980514	1.27235	0.0961275	0.998072	4567	172	1.09367	0.945006	1.26573	0.229674	0.999831	4542	145	1.13903	0.997242	1.30098	0.0549492	0.926196	4252	150	1.11511	0.960459	1.29467	0.152613	0.801968	4228	124	0.802
PUF60	seq.10575.31	0.853282	0.703223	1.03536	0.107867	0.998072	4567	172	0.932226	0.768807	1.13038	0.475421	0.999831	4542	145	0.790922	0.635015	0.985109	0.0362655	0.911015	4252	150	0.864735	0.691522	1.08133	0.202541	0.801968	4228	124	0.802
PLXDC2	seq.10576.7	1.02115	0.851877	1.22406	0.820952	0.998072	4567	172	0.924168	0.755706	1.13018	0.442443	0.999831	4542	145	0.963611	0.787004	1.17985	0.719697	0.998408	4252	150	0.838873	0.667159	1.05478	0.132691	0.801521	4228	124	0.802
PLOD3	seq.10612.18	1.15915	0.965045	1.3923	0.114225	0.998072	4567	172	1.10009	0.900447	1.344	0.350486	0.999831	4542	145	1.23645	1.01389	1.50785	0.0360564	0.910549	4252	150	1.19253	0.955944	1.48766	0.118607	0.801521	4228	124	0.802
ST6GALNAC3	seq.10626.116	0.847043	0.700617	1.02407	0.0864649	0.998072	4567	172	0.842495	0.685167	1.03595	0.10414	0.999831	4542	145	0.878591	0.727741	1.06071	0.178063	0.998408	4252	150	0.869823	0.70334	1.07571	0.198209	0.801968	4228	124	0.802
APLP2	seq.10627.87	1.05428	0.842075	1.31997	0.644793	0.998072	4567	172	1.16984	0.922448	1.48357	0.195644	0.999831	4542	145	1.07125	0.844557	1.3588	0.570467	0.998408	4252	150	1.24818	0.97819	1.59269	0.0746386	0.801521	4228	124	0.802
OLFM3	seq.10643.16	0.837206	0.69937	1.00221	0.0528725	0.998072	4567	172	0.868103	0.720819	1.04548	0.135933	0.999831	4542	145	0.81791	0.667112	1.00279	0.0532152	0.926196	4252	150	0.848034	0.678721	1.05958	0.146874	0.801968	4228	124	0.802
COL28A1	seq.10702.1	1.11427	0.931587	1.33277	0.236291	0.998072	4567	172	1.15138	0.9545	1.38888	0.140672	0.999831	4542	145	1.10142	0.905262	1.34009	0.334364	0.998408	4252	150	1.16038	0.939142	1.43373	0.168133	0.801968	4228	124	0.802
SUDS3	seq.10703.203	0.829803	0.688248	1.00047	0.0505775	0.998072	4567	172	0.83306	0.682207	1.01727	0.0731323	0.999831	4542	145	0.842246	0.687814	1.03135	0.0966584	0.998408	4252	150	0.832865	0.661311	1.04892	0.120158	0.801521	4228	124	0.802
CD300LB	seq.10713.151	0.877712	0.75002	1.02714	0.103925	0.998072	4567	172	0.885425	0.74235	1.05607	0.175972	0.999831	4542	145	0.842046	0.704811	1.006	0.0582162	0.926806	4252	150	0.832282	0.678279	1.02125	0.0786505	0.801521	4228	124	0.802
ACE	seq.10714.7	0.91236	0.769591	1.08162	0.290793	0.998072	4567	172	0.88933	0.732546	1.07967	0.235894	0.999831	4542	145	0.890268	0.735933	1.07697	0.231456	0.998408	4252	150	0.845808	0.679564	1.05272	0.133654	0.801521	4228	124	0.802
HSPA1A	seq.10721.76	0.859926	0.700289	1.05595	0.149768	0.998072	4567	172	0.871884	0.698013	1.08906	0.226989	0.999831	4542	145	0.836193	0.667929	1.04685	0.118615	0.998408	4252	150	0.839849	0.65822	1.0716	0.160377	0.801968	4228	124	0.802
SYK	seq.10722.13	1.02087	0.780997	1.3344	0.879882	0.998072	4567	172	1.08341	0.82157	1.4287	0.570316	0.999831	4542	145	1.14171	0.892814	1.46	0.290819	0.998408	4252	150	1.23644	0.965588	1.58326	0.0924899	0.801521	4228	124	0.802
PROK2	seq.10754.113	1.02934	0.871353	1.21597	0.733758	0.998072	4567	172	1.06224	0.887734	1.27104	0.509624	0.999831	4542	145	1.12657	0.934461	1.35817	0.211525	0.998408	4252	150	1.1744	0.951116	1.45009	0.135134	0.801521	4228	124	0.802
UCN3	seq.10756.34	1.1052	0.940854	1.29825	0.223318	0.998072	4567	172	1.09287	0.940317	1.27016	0.246977	0.999831	4542	145	1.10627	0.93287	1.3119	0.245598	0.998408	4252	150	1.13009	0.970584	1.31582	0.115165	0.801521	4228	124	0.802
KERA	seq.10758.2	0.89521	0.747062	1.07274	0.230408	0.998072	4567	172	0.858488	0.703489	1.04764	0.133121	0.999831	4542	145	0.887617	0.726541	1.0844	0.243261	0.998408	4252	150	0.841335	0.671091	1.05477	0.134199	0.801521	4228	124	0.802
RAB3D	seq.10780.10	0.926407	0.798164	1.07526	0.314641	0.998072	4567	172	0.864382	0.730213	1.0232	0.0903658	0.999831	4542	145	0.939751	0.800486	1.10324	0.447649	0.998408	4252	150	0.866796	0.718417	1.04582	0.135622	0.801521	4228	124	0.802
PLXNB2	seq.10855.55	1.10025	0.941363	1.28596	0.22989	0.998072	4567	172	1.09661	0.927613	1.2964	0.280131	0.999831	4542	145	1.13003	0.953515	1.33923	0.158331	0.998408	4252	150	1.13814	0.94673	1.36824	0.168415	0.801968	4228	124	0.802
PPP4R3A	seq.10866.60	0.790787	0.644692	0.969988	0.0242972	0.998072	4567	172	0.834922	0.670023	1.0404	0.108018	0.999831	4542	145	0.784752	0.629742	0.977919	0.0308596	0.879255	4252	150	0.821226	0.645023	1.04556	0.109953	0.801521	4228	124	0.802
C6orf89	seq.10885.36	0.924596	0.764029	1.11891	0.420496	0.998072	4567	172	0.913915	0.735241	1.13601	0.417336	0.999831	4542	145	0.903367	0.765595	1.06593	0.228696	0.998408	4252	150	0.867073	0.710989	1.05742	0.158953	0.801968	4228	124	0.802
GALNT13	seq.10908.2	1.07752	0.921711	1.25967	0.348789	0.998072	4567	172	1.12213	0.962306	1.3085	0.141597	0.999831	4542	145	1.07859	0.90602	1.28404	0.395032	0.998408	4252	150	1.13538	0.956396	1.34785	0.146888	0.801968	4228	124	0.802
STX6	seq.10945.11	1.12687	0.919848	1.38048	0.248792	0.998072	4567	172	1.11069	0.894679	1.37884	0.341405	0.999831	4542	145	1.23247	1.02065	1.48826	0.0298264	0.879255	4252	150	1.20437	0.975835	1.48644	0.0832469	0.801521	4228	124	0.802
PLD3	seq.10948.14	1.15071	0.961197	1.37758	0.126277	0.998072	4567	172	1.14547	0.946033	1.38695	0.164052	0.999831	4542	145	1.20188	0.983963	1.46807	0.0716065	0.957162	4252	150	1.19171	0.961457	1.47711	0.10934	0.801521	4228	124	0.802
CLEC10A	seq.10955.4	0.902072	0.78007	1.04315	0.164489	0.998072	4567	172	0.86939	0.73149	1.03329	0.112201	0.999831	4542	145	0.891964	0.755267	1.0534	0.177966	0.998408	4252	150	0.828621	0.669719	1.02523	0.0835146	0.801521	4228	124	0.802
PLAAT4	seq.10961.15	0.991154	0.838398	1.17174	0.917131	0.998072	4567	172	1.04076	0.888577	1.219	0.620387	0.999831	4542	145	1.04704	0.889847	1.23199	0.579701	0.998408	4252	150	1.10701	0.948678	1.29177	0.196714	0.801968	4228	124	0.802
GPD1	seq.11081.1	0.858301	0.718322	1.02556	0.0925352	0.998072	4567	172	0.842919	0.6955	1.02159	0.0814622	0.999831	4542	145	0.868546	0.706209	1.0682	0.181862	0.998408	4252	150	0.829612	0.660862	1.04145	0.107408	0.801521	4228	124	0.802
IGHA1|IGHA2	seq.11089.7	0.85061	0.729693	0.991563	0.0386112	0.998072	4567	172	0.847276	0.718155	0.999612	0.0494611	0.999831	4542	145	0.854784	0.728308	1.00322	0.0547803	0.926196	4252	150	0.869767	0.726191	1.04173	0.129557	0.801521	4228	124	0.802
N6AMT1	seq.11096.57	1.06213	0.778577	1.44895	0.70364	0.998072	4567	172	1.11017	0.834369	1.47713	0.473214	0.999831	4542	145	1.17627	0.893439	1.54864	0.247274	0.998408	4252	150	1.23564	0.957168	1.59514	0.104373	0.801521	4228	124	0.802
TLR4	seq.11101.18	0.896237	0.755097	1.06376	0.210191	0.998072	4567	172	0.89505	0.739515	1.0833	0.254922	0.999831	4542	145	0.880528	0.735515	1.05413	0.165805	0.998408	4252	150	0.871773	0.711195	1.06861	0.186454	0.801968	4228	124	0.802
C11orf87	seq.11116.16	1.11618	0.933899	1.33403	0.226959	0.998072	4567	172	1.09041	0.926798	1.28291	0.296707	0.999831	4542	145	1.18318	0.982293	1.42515	0.0764254	0.969964	4252	150	1.12787	0.950115	1.33889	0.169069	0.801968	4228	124	0.802
BMP15	seq.11129.66	1.06991	0.934129	1.22544	0.329096	0.998072	4567	172	1.07452	0.919348	1.25588	0.366404	0.999831	4542	145	1.11309	0.967785	1.2802	0.133311	0.998408	4252	150	1.11981	0.9594	1.30703	0.151416	0.801968	4228	124	0.802
CSF2RB	seq.11137.43	0.923824	0.810241	1.05333	0.236512	0.998072	4567	172	0.857169	0.726768	1.01097	0.0671839	0.999831	4542	145	0.921376	0.802505	1.05786	0.245262	0.998408	4252	150	0.852741	0.716529	1.01485	0.0728109	0.801521	4228	124	0.802
ANGPTL1	seq.11142.11	1.17998	0.999045	1.39368	0.0513248	0.998072	4567	172	1.18915	0.993266	1.42366	0.0592379	0.999831	4542	145	1.1707	0.966637	1.41784	0.106795	0.998408	4252	150	1.19066	0.968904	1.46316	0.0970006	0.801521	4228	124	0.802
DEFB116	seq.11144.10	0.962439	0.833958	1.11071	0.600496	0.998072	4567	172	0.920572	0.76736	1.10438	0.372896	0.999831	4542	145	0.896494	0.76546	1.04996	0.175323	0.998408	4252	150	0.832168	0.675579	1.02505	0.0841019	0.801521	4228	124	0.802
TBX22	seq.11146.4	1.03519	0.913183	1.17349	0.588854	0.998072	4567	172	0.938316	0.790093	1.11435	0.46797	0.999831	4542	145	0.973796	0.828279	1.14488	0.74779	0.998408	4252	150	0.827997	0.655695	1.04557	0.112829	0.801521	4228	124	0.802
HSPA1A	seq.11157.35	1.04762	0.864458	1.2696	0.635149	0.998072	4567	172	1.10354	0.907291	1.34223	0.324063	0.999831	4542	145	1.10339	0.907529	1.34153	0.323734	0.998408	4252	150	1.18311	0.968433	1.44539	0.099761	0.801521	4228	124	0.802
SMARCC1	seq.11180.17	0.902062	0.767492	1.06023	0.21112	0.998072	4567	172	0.873975	0.722132	1.05775	0.166534	0.999831	4542	145	0.894571	0.758046	1.05569	0.187295	0.998408	4252	150	0.877556	0.723536	1.06436	0.18467	0.801968	4228	124	0.802
CHGA	seq.11184.51	1.2208	1.03549	1.43927	0.0175381	0.927659	4567	172	1.20629	0.999932	1.45524	0.0500785	0.999831	4542	145	1.19486	1.00172	1.42523	0.0478008	0.92329	4252	150	1.13868	0.929211	1.39537	0.210521	0.801968	4228	124	0.802
GCH1	seq.11185.145	0.915203	0.796532	1.05156	0.211104	0.998072	4567	172	0.886431	0.749382	1.04855	0.159484	0.999831	4542	145	0.907539	0.771801	1.06715	0.240504	0.998408	4252	150	0.874893	0.70833	1.08062	0.21483	0.801968	4228	124	0.802
CLEC12A	seq.11187.11	1.0665	0.906683	1.25449	0.436975	0.998072	4567	172	1.12282	0.94015	1.34098	0.20099	0.999831	4542	145	1.07321	0.899644	1.28025	0.43247	0.998408	4252	150	1.13842	0.939129	1.38	0.186713	0.801968	4228	124	0.802
TINAGL1	seq.11192.168	0.949986	0.790751	1.14129	0.5836	0.998072	4567	172	0.881763	0.719777	1.0802	0.22435	0.999831	4542	145	0.90514	0.726654	1.12747	0.373798	0.998408	4252	150	0.82829	0.645261	1.06323	0.139215	0.801968	4228	124	0.802
CREB3L1	seq.11198.37	0.884228	0.742824	1.05255	0.166376	0.998072	4567	172	0.840101	0.686603	1.02791	0.0905415	0.999831	4542	145	0.858285	0.70866	1.0395	0.117909	0.998408	4252	150	0.834676	0.669747	1.04022	0.107631	0.801521	4228	124	0.802
PKLR	seq.11203.97	0.998763	0.824387	1.21002	0.989908	0.998072	4567	172	1.06674	0.882443	1.28953	0.50436	0.999831	4542	145	1.08947	0.899695	1.31929	0.380173	0.998408	4252	150	1.16812	0.963764	1.4158	0.113237	0.801521	4228	124	0.802
TBCE	seq.11211.7	0.972183	0.704152	1.34224	0.863888	0.998072	4567	172	1.15917	0.816101	1.64644	0.409394	0.999831	4542	145	1.08684	0.771552	1.53096	0.633815	0.998408	4252	150	1.33861	0.940525	1.90519	0.105341	0.801521	4228	124	0.802
CTBP1	seq.11217.16	0.973875	0.770436	1.23103	0.824763	0.998072	4567	172	1.08468	0.865654	1.35913	0.479964	0.999831	4542	145	1.04691	0.835499	1.31181	0.690394	0.998408	4252	150	1.17118	0.944791	1.45182	0.149359	0.801968	4228	124	0.802
C10orf105	seq.11220.53	0.978401	0.833085	1.14906	0.790099	0.998072	4567	172	0.935281	0.769746	1.13641	0.500787	0.999831	4542	145	0.903141	0.724078	1.12648	0.366203	0.998408	4252	150	0.830195	0.622633	1.10695	0.204875	0.801968	4228	124	0.802
ERN1	seq.11229.16	1.12906	0.960019	1.32786	0.142402	0.998072	4567	172	1.11949	0.940259	1.33289	0.204798	0.999831	4542	145	1.14488	0.969123	1.35251	0.111575	0.998408	4252	150	1.13188	0.945115	1.35555	0.178157	0.801968	4228	124	0.802
ADGRF1	seq.11243.90	1.08468	0.911449	1.29083	0.359887	0.998072	4567	172	1.09869	0.907597	1.33003	0.334312	0.999831	4542	145	1.13638	0.950496	1.35862	0.160652	0.998408	4252	150	1.16831	0.961345	1.41983	0.117885	0.801521	4228	124	0.802
NAGS	seq.11247.20	1.12591	0.981045	1.29217	0.0914749	0.998072	4567	172	1.12538	0.962685	1.31557	0.138166	0.999831	4542	145	1.1562	0.991602	1.34813	0.0639727	0.940944	4252	150	1.17051	0.982245	1.39487	0.0784471	0.801521	4228	124	0.802
MADCAM1	seq.11258.41	0.968333	0.708187	1.32404	0.840234	0.998072	4567	172	1.07399	0.803697	1.43518	0.629402	0.999831	4542	145	1.06993	0.790071	1.44893	0.662164	0.998408	4252	150	1.20498	0.923387	1.57243	0.169736	0.801968	4228	124	0.802
ALDH1A1	seq.11265.8	1.06734	0.896032	1.27139	0.465334	0.998072	4567	172	1.11121	0.931156	1.32608	0.242338	0.999831	4542	145	1.11585	0.919733	1.35378	0.266335	0.998408	4252	150	1.18896	0.968661	1.45936	0.0978317	0.801521	4228	124	0.802
CHCHD10	seq.11270.17	1.08812	0.950772	1.2453	0.219934	0.998072	4567	172	1.12009	0.973157	1.28922	0.113936	0.999831	4542	145	1.11243	0.963029	1.28501	0.14761	0.998408	4252	150	1.14797	0.982752	1.34098	0.0817623	0.801521	4228	124	0.802
LRP1B	seq.11275.94	1.04675	0.885032	1.23801	0.593628	0.998072	4567	172	1.10991	0.937404	1.31417	0.226286	0.999831	4542	145	1.06257	0.875945	1.28896	0.537962	0.998408	4252	150	1.14194	0.940015	1.38724	0.181253	0.801968	4228	124	0.802
COL11A2	seq.11278.4	0.811225	0.67181	0.979573	0.0296664	0.998072	4567	172	0.872523	0.711301	1.07029	0.190774	0.999831	4542	145	0.789775	0.630362	0.989502	0.0401941	0.92329	4252	150	0.850053	0.663245	1.08948	0.199444	0.801968	4228	124	0.802
LAIR1	seq.11284.24	0.992335	0.843389	1.16759	0.926117	0.998072	4567	172	0.903849	0.733963	1.11306	0.341263	0.999831	4542	145	0.902843	0.740485	1.1008	0.312253	0.998408	4252	150	0.821694	0.632702	1.06714	0.140831	0.801968	4228	124	0.802
SAMHD1	seq.11303.7	0.88155	0.73071	1.06353	0.187931	0.998072	4567	172	0.822426	0.642781	1.05228	0.120006	0.999831	4542	145	0.903457	0.745608	1.09472	0.300082	0.998408	4252	150	0.846517	0.652245	1.09865	0.210325	0.801968	4228	124	0.802
RAG1	seq.11311.79	0.929308	0.808759	1.06783	0.30102	0.998072	4567	172	0.908804	0.762946	1.08255	0.284007	0.999831	4542	145	0.903846	0.775624	1.05326	0.19526	0.998408	4252	150	0.864393	0.70576	1.05868	0.158908	0.801968	4228	124	0.802
GRB10	seq.11358.15	1.03095	0.756416	1.40513	0.846993	0.998072	4567	172	1.14222	0.815725	1.59939	0.438827	0.999831	4542	145	1.14702	0.826445	1.59195	0.412106	0.998408	4252	150	1.33187	0.952426	1.86247	0.0939158	0.801521	4228	124	0.802
RRM1	seq.11360.39	1.01671	0.852423	1.21266	0.85379	0.998072	4567	172	1.08873	0.909934	1.30266	0.352987	0.999831	4542	145	1.07305	0.896736	1.28403	0.441376	0.998408	4252	150	1.15654	0.956847	1.3979	0.13262	0.801521	4228	124	0.802
AQP4	seq.11363.58	0.97256	0.82473	1.14689	0.740828	0.998072	4567	172	0.912786	0.73668	1.13099	0.404041	0.999831	4542	145	0.917332	0.763474	1.10219	0.35695	0.998408	4252	150	0.823712	0.635881	1.06703	0.141918	0.801968	4228	124	0.802
ADH5	seq.11369.23	1.07121	0.786739	1.45853	0.66225	0.998072	4567	172	1.22926	0.891787	1.69443	0.207465	0.999831	4542	145	1.12515	0.8048	1.57302	0.490354	0.998408	4252	150	1.31846	0.936459	1.85628	0.11322	0.801521	4228	124	0.802
INPP5E	seq.11370.20	0.861314	0.717622	1.03378	0.108878	0.998072	4567	172	0.856406	0.702526	1.04399	0.125035	0.999831	4542	145	0.836973	0.679851	1.03041	0.0934191	0.99316	4252	150	0.822782	0.657019	1.03037	0.0892478	0.801521	4228	124	0.802
KRT7	seq.11383.41	0.940031	0.812526	1.08754	0.405662	0.998072	4567	172	0.889146	0.756951	1.04443	0.152518	0.999831	4542	145	0.909939	0.785869	1.0536	0.206985	0.998408	4252	150	0.890034	0.753151	1.05179	0.171527	0.801968	4228	124	0.802
WFDC2	seq.11388.75	1.11412	0.935096	1.32741	0.226614	0.998072	4567	172	1.16038	0.96425	1.3964	0.115343	0.999831	4542	145	1.19867	0.955379	1.50392	0.117436	0.998408	4252	150	1.22424	0.951638	1.57493	0.115421	0.801521	4228	124	0.802
MVK	seq.11391.69	1.08164	0.926352	1.26295	0.320957	0.998072	4567	172	1.05637	0.893738	1.2486	0.520257	0.999831	4542	145	1.13421	0.966436	1.33111	0.123079	0.998408	4252	150	1.13066	0.956038	1.33717	0.151364	0.801968	4228	124	0.802
CARD9	seq.11405.150	0.869156	0.721087	1.04763	0.141104	0.998072	4567	172	0.826866	0.672818	1.01619	0.0707058	0.999831	4542	145	0.867882	0.723096	1.04166	0.128084	0.998408	4252	150	0.84915	0.692059	1.0419	0.117179	0.801521	4228	124	0.802
PDLIM1	seq.11428.31	0.956914	0.697922	1.31202	0.784461	0.998072	4567	172	1.05877	0.758073	1.47875	0.737585	0.999831	4542	145	1.12843	0.827245	1.53926	0.445617	0.998408	4252	150	1.28023	0.934313	1.75422	0.12424	0.801521	4228	124	0.802
HNRNPC	seq.11429.80	0.986157	0.852045	1.14138	0.851735	0.998072	4567	172	0.867665	0.746582	1.00839	0.0641539	0.999831	4542	145	1.01399	0.861466	1.19352	0.867336	0.998408	4252	150	0.881684	0.745172	1.04321	0.14233	0.801968	4228	124	0.802
TCTN2	seq.11433.11	0.901176	0.763008	1.06436	0.220421	0.998072	4567	172	0.865521	0.722942	1.03622	0.115812	0.999831	4542	145	0.90492	0.749436	1.09266	0.29895	0.998408	4252	150	0.849911	0.685968	1.05303	0.136916	0.801521	4228	124	0.802
SOCS3	seq.11440.58	1.10833	0.979074	1.25464	0.10401	0.998072	4567	172	1.08202	0.940046	1.24543	0.272006	0.999831	4542	145	1.13915	1.00451	1.29183	0.0423405	0.92329	4252	150	1.11687	0.970856	1.28485	0.122045	0.801521	4228	124	0.802
POLR3F	seq.11444.49	0.916829	0.77826	1.08007	0.298959	0.998072	4567	172	0.928053	0.765038	1.1258	0.44867	0.999831	4542	145	0.828943	0.661549	1.03869	0.103075	0.998408	4252	150	0.838102	0.64439	1.09005	0.187824	0.801968	4228	124	0.802
MAGEB10	seq.11456.2	0.933716	0.805239	1.08269	0.363845	0.998072	4567	172	0.893825	0.759694	1.05164	0.176031	0.999831	4542	145	0.929425	0.798778	1.08144	0.343649	0.998408	4252	150	0.894386	0.756055	1.05803	0.192906	0.801968	4228	124	0.802
PCBP1	seq.11458.30	0.96651	0.72331	1.29148	0.817828	0.998072	4567	172	1.17937	0.861088	1.61529	0.303931	0.999831	4542	145	1.04087	0.760749	1.42413	0.80226	0.998408	4252	150	1.30261	0.931185	1.82218	0.122665	0.801521	4228	124	0.802
VPS4A	seq.11476.43	0.86307	0.597386	1.24691	0.432768	0.998072	4567	172	1.01005	0.692074	1.47411	0.958674	0.999831	4542	145	1.02675	0.714828	1.4748	0.886361	0.998408	4252	150	1.2442	0.893656	1.73224	0.19564	0.801968	4228	124	0.802
ZNF174	seq.11486.26	0.895825	0.755512	1.0622	0.205601	0.998072	4567	172	0.857173	0.70427	1.04327	0.124196	0.999831	4542	145	0.884937	0.739153	1.05947	0.183204	0.998408	4252	150	0.86314	0.70279	1.06008	0.160433	0.801968	4228	124	0.802
UBL4A	seq.11490.42	0.94511	0.614016	1.45474	0.797517	0.998072	4567	172	1.11482	0.728578	1.70581	0.616485	0.999831	4542	145	1.11786	0.732183	1.70668	0.605804	0.998408	4252	150	1.34642	0.933955	1.94106	0.110964	0.801521	4228	124	0.802
DYNLL2	seq.11493.169	0.970842	0.685545	1.37487	0.867612	0.998072	4567	172	1.14792	0.797733	1.65182	0.457518	0.999831	4542	145	1.07176	0.742274	1.54751	0.711544	0.998408	4252	150	1.30638	0.909396	1.87665	0.148149	0.801968	4228	124	0.802
APOL1	seq.11510.31	1.10534	0.92149	1.32586	0.280565	0.998072	4567	172	1.17255	0.962207	1.42888	0.114549	0.999831	4542	145	1.06125	0.870128	1.29436	0.55732	0.998408	4252	150	1.15795	0.928891	1.4435	0.192209	0.801968	4228	124	0.802
MLYCD	seq.11538.216	0.860893	0.710496	1.04313	0.126264	0.998072	4567	172	0.862761	0.695928	1.06959	0.178172	0.999831	4542	145	0.828057	0.665049	1.03102	0.0916254	0.99316	4252	150	0.840753	0.659347	1.07207	0.161873	0.801968	4228	124	0.802
ATP5MF	seq.11539.4	0.907681	0.767235	1.07383	0.258729	0.998072	4567	172	0.870697	0.717689	1.05633	0.160241	0.999831	4542	145	0.916697	0.765705	1.09746	0.343533	0.998408	4252	150	0.873216	0.704976	1.08161	0.214394	0.801968	4228	124	0.802
TMEM230	seq.11542.11	1.05898	0.897222	1.2499	0.498011	0.998072	4567	172	1.02742	0.856719	1.23214	0.770423	0.999831	4542	145	1.13779	0.984683	1.31469	0.0800053	0.980121	4252	150	1.11349	0.947837	1.30811	0.190832	0.801968	4228	124	0.802
CYGB	seq.11546.7	0.940952	0.801044	1.10529	0.458658	0.998072	4567	172	0.919517	0.765708	1.10422	0.368952	0.999831	4542	145	0.891564	0.731064	1.0873	0.257021	0.998408	4252	150	0.866276	0.690318	1.08708	0.21527	0.801968	4228	124	0.802
ARFGAP1	seq.11556.19	1.02164	0.878623	1.18792	0.780862	0.998072	4567	172	1.07045	0.906586	1.26394	0.421895	0.999831	4542	145	1.05493	0.89274	1.24659	0.530086	0.998408	4252	150	1.13071	0.937053	1.36438	0.199957	0.801968	4228	124	0.802
SMURF1	seq.11557.3	0.879765	0.743949	1.04038	0.134305	0.998072	4567	172	0.846774	0.707479	1.01349	0.0697053	0.999831	4542	145	0.875438	0.723287	1.0596	0.172029	0.998408	4252	150	0.837364	0.680251	1.03077	0.0940939	0.801521	4228	124	0.802
FKBP1B	seq.11568.2	0.99151	0.799402	1.22978	0.938152	0.998072	4567	172	1.05514	0.852914	1.30531	0.621019	0.999831	4542	145	1.06736	0.881132	1.29295	0.505161	0.998408	4252	150	1.12905	0.933801	1.36513	0.210216	0.801968	4228	124	0.802
DNAJA2	seq.11582.63	1.02549	0.823514	1.277	0.822056	0.998072	4567	172	1.09199	0.869751	1.37102	0.448443	0.999831	4542	145	1.05477	0.848231	1.31159	0.631545	0.998408	4252	150	1.15533	0.934871	1.42778	0.181361	0.801968	4228	124	0.802
LRRN1	seq.11586.2	0.856886	0.703661	1.04348	0.124392	0.998072	4567	172	0.864919	0.698381	1.07117	0.183538	0.999831	4542	145	0.834767	0.666262	1.04589	0.116422	0.998408	4252	150	0.840986	0.656121	1.07794	0.171497	0.801968	4228	124	0.802
MAP1LC3B	seq.11608.5	0.975907	0.714071	1.33376	0.878387	0.998072	4567	172	1.1364	0.815062	1.58443	0.45081	0.999831	4542	145	1.10989	0.806098	1.52818	0.522827	0.998408	4252	150	1.32528	0.966106	1.818	0.0807759	0.801521	4228	124	0.802
ERH	seq.11614.29	0.989372	0.821305	1.19183	0.910441	0.998072	4567	172	1.1163	0.928137	1.34262	0.242733	0.999831	4542	145	1.00695	0.830708	1.22058	0.943768	0.998408	4252	150	1.13534	0.934366	1.37955	0.201594	0.801968	4228	124	0.802
TRAF4	seq.11629.36	0.954673	0.812563	1.12164	0.57269	0.998072	4567	172	0.915308	0.77074	1.08699	0.312996	0.999831	4542	145	0.875148	0.735653	1.04109	0.132218	0.998408	4252	150	0.867167	0.704416	1.06752	0.178984	0.801968	4228	124	0.802
TAGLN2	seq.11636.33	0.986687	0.722334	1.34778	0.932871	0.998072	4567	172	1.07802	0.774577	1.50034	0.655998	0.999831	4542	145	1.1859	0.904166	1.55542	0.217933	0.998408	4252	150	1.29167	0.977649	1.70655	0.0717124	0.801521	4228	124	0.802
P4HA1	seq.11645.9	0.928508	0.785346	1.09777	0.38528	0.998072	4567	172	0.924078	0.763432	1.11853	0.417728	0.999831	4542	145	0.870465	0.719425	1.05321	0.153647	0.998408	4252	150	0.839404	0.671723	1.04894	0.123626	0.801521	4228	124	0.802
SMAP1	seq.11649.3	1.04507	0.751843	1.45265	0.793046	0.998072	4567	172	1.14238	0.806806	1.61754	0.45314	0.999831	4542	145	1.19268	0.855635	1.66249	0.2984	0.998408	4252	150	1.33908	0.964369	1.85939	0.0812683	0.801521	4228	124	0.802
GGA3	seq.11683.19	0.949795	0.690478	1.3065	0.751534	0.998072	4567	172	1.07346	0.779768	1.47776	0.663821	0.999831	4542	145	1.06706	0.769652	1.4794	0.696986	0.998408	4252	150	1.22825	0.894849	1.68586	0.203233	0.801968	4228	124	0.802
PTP4A2	seq.11699.16	1.00954	0.769065	1.32521	0.945453	0.998072	4567	172	1.10665	0.847755	1.44461	0.456095	0.999831	4542	145	1.11074	0.847091	1.45644	0.447456	0.998408	4252	150	1.23939	0.964133	1.59324	0.0939445	0.801521	4228	124	0.802
CPT1B	seq.11709.29	0.960531	0.814994	1.13206	0.630966	0.998072	4567	172	0.894034	0.733911	1.08909	0.265961	0.999831	4542	145	0.934925	0.794463	1.10022	0.417877	0.998408	4252	150	0.878174	0.725559	1.06289	0.18227	0.801968	4228	124	0.802
UNC45A	seq.11712.207	1.03352	0.742537	1.43853	0.845057	0.998072	4567	172	1.18551	0.838319	1.6765	0.335788	0.999831	4542	145	1.11772	0.779899	1.60188	0.544434	0.998408	4252	150	1.3298	0.929175	1.90316	0.119144	0.801521	4228	124	0.802
MET	seq.11814.29	1.00865	0.842127	1.2081	0.925453	0.998072	4567	172	0.934782	0.771129	1.13317	0.49219	0.999831	4542	145	0.955781	0.773757	1.18062	0.674793	0.998408	4252	150	0.863577	0.684425	1.08962	0.216296	0.801968	4228	124	0.802
PTPN11	seq.11830.48	0.97026	0.711834	1.32251	0.848478	0.998072	4567	172	1.19115	0.866758	1.63696	0.280849	0.999831	4542	145	1.062	0.758617	1.48671	0.725986	0.998408	4252	150	1.34486	0.964739	1.87475	0.0804302	0.801521	4228	124	0.802
FXN	seq.11833.83	0.885964	0.736808	1.06531	0.197987	0.998072	4567	172	0.887496	0.73801	1.06726	0.204701	0.999831	4542	145	0.899424	0.759324	1.06537	0.219821	0.998408	4252	150	0.892805	0.754158	1.05694	0.187893	0.801968	4228	124	0.802
PTPRH	seq.11988.24	0.923611	0.788147	1.08236	0.326107	0.998072	4567	172	0.840137	0.683955	1.03198	0.0969178	0.999831	4542	145	0.933395	0.797761	1.09209	0.389575	0.998408	4252	150	0.840833	0.677453	1.04362	0.115786	0.801521	4228	124	0.802
EMC1	seq.11989.35	0.905457	0.758886	1.08034	0.27032	0.998072	4567	172	0.868913	0.695596	1.08541	0.215743	0.999831	4542	145	0.892817	0.741684	1.07475	0.230848	0.998408	4252	150	0.831876	0.645062	1.07279	0.15604	0.801968	4228	124	0.802
DES	seq.12030.82	0.994922	0.853638	1.15959	0.948058	0.998072	4567	172	0.869122	0.738394	1.023	0.0916739	0.999831	4542	145	1.02997	0.883977	1.20008	0.704933	0.998408	4252	150	0.894303	0.758751	1.05407	0.182842	0.801968	4228	124	0.802
MSTN	seq.12077.32	0.975582	0.833337	1.14211	0.758501	0.998072	4567	172	0.924021	0.774692	1.10213	0.379588	0.999831	4542	145	0.946827	0.793864	1.12926	0.543334	0.998408	4252	150	0.878016	0.71881	1.07248	0.202502	0.801968	4228	124	0.802
SARS2	seq.12348.46	1.02114	0.756097	1.3791	0.891454	0.998072	4567	172	1.12534	0.821375	1.5418	0.462287	0.999831	4542	145	1.09141	0.798102	1.4925	0.58387	0.998408	4252	150	1.22695	0.890029	1.69142	0.211766	0.801968	4228	124	0.802
SRI	seq.12356.65	0.957513	0.747208	1.22701	0.731497	0.998072	4567	172	1.08319	0.855743	1.37108	0.506369	0.999831	4542	145	1.05531	0.814788	1.36684	0.683313	0.998408	4252	150	1.20284	0.933146	1.55049	0.153922	0.801968	4228	124	0.802
IGBP1	seq.12358.6	0.984455	0.76242	1.27115	0.90437	0.998072	4567	172	1.13998	0.883755	1.4705	0.313155	0.999831	4542	145	1.07523	0.817715	1.41383	0.603578	0.998408	4252	150	1.25225	0.953594	1.64443	0.105627	0.801521	4228	124	0.802
PAFAH1B3	seq.12374.8	0.968901	0.78488	1.19607	0.768772	0.998072	4567	172	1.07427	0.871856	1.32368	0.501207	0.999831	4542	145	1.05237	0.844316	1.3117	0.64968	0.998408	4252	150	1.17855	0.944477	1.47064	0.145857	0.801968	4228	124	0.802
CBR1	seq.12381.26	1.08211	0.940686	1.24479	0.269467	0.998072	4567	172	1.09624	0.94373	1.27341	0.229265	0.999831	4542	145	1.10241	0.945935	1.28477	0.211902	0.998408	4252	150	1.1368	0.96673	1.33678	0.120961	0.801521	4228	124	0.802
ORC6	seq.12389.4	0.938767	0.767966	1.14756	0.53743	0.998072	4567	172	0.853769	0.698017	1.04428	0.123946	0.999831	4542	145	0.913092	0.73605	1.13272	0.408368	0.998408	4252	150	0.843032	0.673039	1.05596	0.137256	0.801521	4228	124	0.802
ARL1	seq.12392.30	1.0441	0.87563	1.24499	0.630726	0.998072	4567	172	1.09087	0.911162	1.30603	0.343621	0.999831	4542	145	1.06031	0.893627	1.25808	0.502147	0.998408	4252	150	1.12842	0.95138	1.33841	0.165263	0.801968	4228	124	0.802
DARS2	seq.12395.86	1.02831	0.776453	1.36186	0.845574	0.998072	4567	172	1.13352	0.832517	1.54336	0.426075	0.999831	4542	145	1.09512	0.80751	1.48518	0.558834	0.998408	4252	150	1.25353	0.907034	1.73239	0.171034	0.801968	4228	124	0.802
HIBCH	seq.12396.19	0.991623	0.732305	1.34277	0.956627	0.998072	4567	172	1.09239	0.785068	1.52002	0.600068	0.999831	4542	145	1.09658	0.775786	1.55002	0.601565	0.998408	4252	150	1.25525	0.872879	1.80512	0.220015	0.801968	4228	124	0.802
CCDC50	seq.12399.194	1.08553	0.882418	1.33539	0.437469	0.998072	4567	172	1.09586	0.889787	1.34965	0.389089	0.999831	4542	145	1.15092	0.944578	1.40233	0.163204	0.998408	4252	150	1.1748	0.96342	1.43256	0.111433	0.801521	4228	124	0.802
RAB7B	seq.12409.90	0.927212	0.782804	1.09826	0.381618	0.998072	4567	172	0.863254	0.705606	1.05613	0.152936	0.999831	4542	145	0.898448	0.735084	1.09812	0.295618	0.998408	4252	150	0.813223	0.638969	1.035	0.0928753	0.801521	4228	124	0.802
IST1	seq.12434.25	0.976234	0.692913	1.3754	0.890614	0.998072	4567	172	1.13668	0.796009	1.62315	0.48092	0.999831	4542	145	1.08818	0.765704	1.54647	0.637449	0.998408	4252	150	1.29593	0.914414	1.83662	0.145092	0.801968	4228	124	0.802
TIGAR	seq.12476.50	0.972293	0.819421	1.15369	0.747492	0.998072	4567	172	0.926257	0.749094	1.14532	0.479402	0.999831	4542	145	0.896037	0.743575	1.07976	0.248676	0.998408	4252	150	0.858015	0.684537	1.07546	0.183922	0.801968	4228	124	0.802
RPL30	seq.12478.15	1.02052	0.830225	1.25444	0.847001	0.998072	4567	172	1.16423	0.950625	1.42584	0.14146	0.999831	4542	145	1.02466	0.819707	1.28086	0.830589	0.998408	4252	150	1.17178	0.935334	1.46801	0.168011	0.801968	4228	124	0.802
GABARAPL2	seq.12494.99	1.03402	0.737878	1.44901	0.845934	0.998072	4567	172	1.20758	0.861159	1.69336	0.27419	0.999831	4542	145	1.09338	0.762485	1.56788	0.627352	0.998408	4252	150	1.31135	0.929365	1.85035	0.12283	0.801521	4228	124	0.802
NUDT16L1	seq.12497.29	1.08293	0.818288	1.43315	0.577355	0.998072	4567	172	1.18693	0.888635	1.58536	0.245855	0.999831	4542	145	1.12478	0.826812	1.53012	0.453954	0.998408	4252	150	1.26078	0.920821	1.72624	0.148331	0.801968	4228	124	0.802
TAX1BP3	seq.12498.12	0.966177	0.720629	1.29539	0.818096	0.998072	4567	172	1.08243	0.809117	1.44806	0.593722	0.999831	4542	145	1.02728	0.772161	1.36669	0.853396	0.998408	4252	150	1.20595	0.927372	1.56822	0.162301	0.801968	4228	124	0.802
UBA2	seq.12500.88	1.07214	0.874302	1.31474	0.503311	0.998072	4567	172	1.12747	0.900407	1.41178	0.295724	0.999831	4542	145	1.12985	0.917617	1.39118	0.250104	0.998408	4252	150	1.20227	0.962104	1.50238	0.105188	0.801521	4228	124	0.802
TBCA	seq.12501.10	1.12993	0.946052	1.34954	0.177658	0.998072	4567	172	1.16933	0.966969	1.41404	0.106627	0.999831	4542	145	1.13144	0.944697	1.3551	0.17965	0.998408	4252	150	1.16662	0.961016	1.41621	0.119232	0.801521	4228	124	0.802
GPR68	seq.12503.5	1.08436	0.909681	1.29258	0.366148	0.998072	4567	172	1.1277	0.946561	1.34351	0.178542	0.999831	4542	145	1.13153	0.94148	1.35994	0.187772	0.998408	4252	150	1.17401	0.978667	1.40833	0.0840321	0.801521	4228	124	0.802
CHMP3	seq.12508.9	0.938617	0.651486	1.35229	0.733834	0.998072	4567	172	1.07426	0.755594	1.52731	0.68991	0.999831	4542	145	1.05754	0.743057	1.50511	0.756046	0.998408	4252	150	1.24246	0.907894	1.70032	0.175	0.801968	4228	124	0.802
COMMD1	seq.12509.115	0.898315	0.761331	1.05995	0.203968	0.998072	4567	172	0.858083	0.711107	1.03544	0.110327	0.999831	4542	145	0.901423	0.753877	1.07785	0.255125	0.998408	4252	150	0.852036	0.693755	1.04643	0.126718	0.801521	4228	124	0.802
PDCD5	seq.12517.52	1.03365	0.821223	1.30104	0.777941	0.998072	4567	172	1.21385	0.970836	1.51769	0.0890713	0.999831	4542	145	1.04456	0.802949	1.35886	0.745331	0.998408	4252	150	1.25102	0.962581	1.6259	0.0939714	0.801521	4228	124	0.802
RAD23B	seq.12522.6	0.984985	0.750427	1.29286	0.913183	0.998072	4567	172	1.12417	0.862615	1.46504	0.38635	0.999831	4542	145	1.05804	0.793462	1.41085	0.700771	0.998408	4252	150	1.21044	0.924058	1.58557	0.165569	0.801968	4228	124	0.802
WRNIP1	seq.12528.40	0.911295	0.779506	1.06537	0.243811	0.998072	4567	172	0.863913	0.71756	1.04012	0.122427	0.999831	4542	145	0.921216	0.785561	1.0803	0.312647	0.998408	4252	150	0.885805	0.732747	1.07084	0.210254	0.801968	4228	124	0.802
CYTH2	seq.12533.135	0.935854	0.807758	1.08426	0.377358	0.998072	4567	172	0.878276	0.745328	1.03494	0.121161	0.999831	4542	145	0.941324	0.801811	1.10511	0.460023	0.998408	4252	150	0.881713	0.736649	1.05534	0.169857	0.801968	4228	124	0.802
MTMR6	seq.12536.46	0.974426	0.817728	1.16115	0.772098	0.998072	4567	172	0.938158	0.792571	1.11049	0.458116	0.999831	4542	145	0.863009	0.714934	1.04175	0.125012	0.998408	4252	150	0.868321	0.713281	1.05706	0.159422	0.801968	4228	124	0.802
RHOG	seq.12540.25	1.00525	0.814906	1.24005	0.961015	0.998072	4567	172	1.0718	0.865788	1.32684	0.524319	0.999831	4542	145	1.0778	0.876259	1.32569	0.47811	0.998408	4252	150	1.16459	0.94566	1.43422	0.151535	0.801968	4228	124	0.802
SMTN	seq.12546.1	0.963849	0.731813	1.26946	0.793289	0.998072	4567	172	1.02324	0.763574	1.37122	0.877722	0.999831	4542	145	1.11734	0.84337	1.48031	0.439481	0.998408	4252	150	1.22668	0.925008	1.62673	0.155986	0.801968	4228	124	0.802
RRAGC	seq.12548.75	0.970587	0.841912	1.11893	0.680765	0.998072	4567	172	0.882889	0.745082	1.04618	0.15028	0.999831	4542	145	0.958506	0.821188	1.11879	0.591127	0.998408	4252	150	0.883072	0.733504	1.06314	0.189064	0.801968	4228	124	0.802
HPGDS	seq.12549.33	0.980852	0.818964	1.17474	0.833608	0.998072	4567	172	0.888744	0.734678	1.07512	0.224637	0.999831	4542	145	0.960343	0.792748	1.16337	0.67921	0.998408	4252	150	0.864069	0.704109	1.06037	0.161871	0.801968	4228	124	0.802
UBASH3B	seq.12558.3	0.983127	0.728295	1.32713	0.911486	0.998072	4567	172	1.12594	0.809866	1.56536	0.48046	0.999831	4542	145	1.09646	0.797762	1.50699	0.57036	0.998408	4252	150	1.30174	0.927684	1.82662	0.127084	0.801521	4228	124	0.802
NT5C	seq.12560.9	1.08686	0.872586	1.35376	0.457194	0.998072	4567	172	1.06013	0.839779	1.33831	0.623286	0.999831	4542	145	1.18302	0.952568	1.46922	0.128409	0.998408	4252	150	1.17362	0.933176	1.47603	0.171087	0.801968	4228	124	0.802
FEN1	seq.12577.100	0.948374	0.825878	1.08904	0.452529	0.998072	4567	172	0.934122	0.798492	1.09279	0.394544	0.999831	4542	145	0.907186	0.780201	1.05484	0.205489	0.998408	4252	150	0.893852	0.750662	1.06435	0.207739	0.801968	4228	124	0.802
STK24	seq.12617.2	0.936559	0.705157	1.2439	0.650789	0.998072	4567	172	1.08451	0.790099	1.48863	0.615628	0.999831	4542	145	1.04468	0.76915	1.41891	0.779625	0.998408	4252	150	1.25214	0.900382	1.74132	0.181436	0.801968	4228	124	0.802
AKR1C1	seq.12618.50	0.876463	0.726721	1.05706	0.16775	0.998072	4567	172	0.838797	0.674507	1.0431	0.113978	0.999831	4542	145	0.896462	0.738431	1.08831	0.269301	0.998408	4252	150	0.866461	0.695998	1.07867	0.199692	0.801968	4228	124	0.802
PPP2R1A	seq.12621.55	0.922626	0.706981	1.20405	0.553252	0.998072	4567	172	0.985004	0.755509	1.28421	0.911103	0.999831	4542	145	1.06386	0.841	1.34578	0.605742	0.998408	4252	150	1.16171	0.928468	1.45354	0.189889	0.801968	4228	124	0.802
SENP7	seq.12626.6	0.858346	0.708267	1.04023	0.11928	0.998072	4567	172	0.843584	0.684616	1.03946	0.110338	0.999831	4542	145	0.81799	0.655814	1.02027	0.0747466	0.967287	4252	150	0.830852	0.658048	1.04903	0.119324	0.801521	4228	124	0.802
ATG7	seq.12627.97	1.11231	0.908156	1.36235	0.30357	0.998072	4567	172	1.13993	0.913992	1.42173	0.245215	0.999831	4542	145	1.14551	0.910195	1.44165	0.246891	0.998408	4252	150	1.19754	0.938784	1.52762	0.146668	0.801968	4228	124	0.802
LANCL2	seq.12628.31	0.984031	0.759819	1.27441	0.902883	0.998072	4567	172	1.13285	0.880352	1.45777	0.332286	0.999831	4542	145	1.05037	0.797483	1.38344	0.726586	0.998408	4252	150	1.22238	0.929252	1.60799	0.151155	0.801968	4228	124	0.802
CRAT	seq.12637.7	1.01681	0.750783	1.37711	0.914201	0.998072	4567	172	1.10536	0.799569	1.52809	0.544362	0.999831	4542	145	1.16448	0.860159	1.57646	0.324481	0.998408	4252	150	1.30149	0.960923	1.76276	0.0886674	0.801521	4228	124	0.802
INPP5B	seq.12641.3	0.936154	0.687604	1.27455	0.675165	0.998072	4567	172	1.11256	0.796726	1.5536	0.531241	0.999831	4542	145	1.04127	0.750824	1.44407	0.80849	0.998408	4252	150	1.2813	0.915143	1.79396	0.148858	0.801968	4228	124	0.802
RPE	seq.12646.2	1.08524	0.820608	1.43521	0.566238	0.998072	4567	172	1.09163	0.821788	1.45008	0.545059	0.999831	4542	145	1.13764	0.872214	1.48385	0.341415	0.998408	4252	150	1.23578	0.961607	1.58811	0.0981054	0.801521	4228	124	0.802
SETD2	seq.12647.52	0.994986	0.83377	1.18737	0.955553	0.998072	4567	172	0.895697	0.726603	1.10414	0.30211	0.999831	4542	145	0.89525	0.734535	1.09113	0.273038	0.998408	4252	150	0.844052	0.650465	1.09525	0.202133	0.801968	4228	124	0.802
KLC1	seq.12656.1	0.967683	0.708053	1.32252	0.836703	0.998072	4567	172	1.10784	0.79909	1.53588	0.53894	0.999831	4542	145	1.11472	0.812333	1.52966	0.501168	0.998408	4252	150	1.29214	0.94832	1.7606	0.104416	0.801521	4228	124	0.802
OLA1	seq.12659.13	0.979828	0.715014	1.34272	0.899123	0.998072	4567	172	1.13414	0.833083	1.54399	0.423866	0.999831	4542	145	1.07229	0.777116	1.47959	0.670901	0.998408	4252	150	1.26426	0.930061	1.71854	0.134371	0.801521	4228	124	0.802
TST	seq.12663.1	0.871979	0.745244	1.02027	0.0873373	0.998072	4567	172	0.873386	0.737859	1.03381	0.11559	0.999831	4542	145	0.888587	0.746708	1.05742	0.18322	0.998408	4252	150	0.880544	0.729113	1.06343	0.186407	0.801968	4228	124	0.802
PTPN13	seq.12664.19	0.89883	0.768308	1.05153	0.182735	0.998072	4567	172	0.923035	0.777581	1.0957	0.359978	0.999831	4542	145	0.837882	0.705962	0.994453	0.0430075	0.92329	4252	150	0.873438	0.721754	1.057	0.164407	0.801968	4228	124	0.802
DARS1	seq.12675.14	0.970341	0.713789	1.3191	0.847597	0.998072	4567	172	1.15032	0.828082	1.59795	0.40367	0.999831	4542	145	1.07696	0.772048	1.50231	0.662398	0.998408	4252	150	1.32259	0.938337	1.86419	0.110364	0.801521	4228	124	0.802
DECR1	seq.12687.2	1.02226	0.762386	1.37071	0.883051	0.998072	4567	172	1.16318	0.848054	1.5954	0.348423	0.999831	4542	145	1.12124	0.815499	1.54161	0.481146	0.998408	4252	150	1.33826	0.961931	1.86183	0.0837005	0.801521	4228	124	0.802
KLHL12	seq.12695.62	0.916011	0.763951	1.09834	0.343527	0.998072	4567	172	0.908435	0.742878	1.11089	0.349506	0.999831	4542	145	0.854914	0.709619	1.02996	0.099066	0.998408	4252	150	0.874657	0.715374	1.06941	0.191637	0.801968	4228	124	0.802
PIP4K2A	seq.12697.30	0.954989	0.701392	1.30028	0.769923	0.998072	4567	172	1.12618	0.809429	1.56688	0.480668	0.999831	4542	145	1.05897	0.754419	1.48647	0.740504	0.998408	4252	150	1.28511	0.904292	1.82631	0.161829	0.801968	4228	124	0.802
EIF1B	seq.12701.1	0.943244	0.689387	1.29058	0.714902	0.998072	4567	172	1.14214	0.826631	1.57806	0.420409	0.999831	4542	145	1.05914	0.772265	1.45258	0.721462	0.998408	4252	150	1.2991	0.94908	1.7782	0.10232	0.801521	4228	124	0.802
HERC1	seq.12705.9	1.04689	0.906701	1.20875	0.532166	0.998072	4567	172	1.06042	0.911603	1.23353	0.447019	0.999831	4542	145	1.08383	0.929387	1.26393	0.304733	0.998408	4252	150	1.12529	0.961617	1.31682	0.141037	0.801968	4228	124	0.802
UBQLN4	seq.12720.71	1.04118	0.749106	1.44714	0.810136	0.998072	4567	172	1.18305	0.846095	1.6542	0.325682	0.999831	4542	145	1.11965	0.798614	1.56974	0.512102	0.998408	4252	150	1.31701	0.961397	1.80416	0.0863752	0.801521	4228	124	0.802
PTGFRN	seq.12727.7	0.930843	0.778912	1.11241	0.430541	0.998072	4567	172	0.872547	0.717021	1.06181	0.173443	0.999831	4542	145	0.905762	0.741229	1.10682	0.333178	0.998408	4252	150	0.844406	0.675142	1.0561	0.138409	0.801521	4228	124	0.802
NISCH	seq.12738.43	1.15188	0.969031	1.36923	0.108871	0.998072	4567	172	1.15437	0.972808	1.36982	0.100127	0.999831	4542	145	1.09382	0.921475	1.29839	0.305311	0.998408	4252	150	1.13817	0.955668	1.35552	0.146653	0.801968	4228	124	0.802
ITGB2	seq.12750.9	0.901554	0.777018	1.04605	0.171812	0.998072	4567	172	0.896487	0.75608	1.06297	0.208627	0.999831	4542	145	0.875739	0.742206	1.0333	0.11596	0.998408	4252	150	0.86849	0.716304	1.05301	0.151429	0.801968	4228	124	0.802
APBB2	seq.12753.6	0.982915	0.857788	1.1263	0.8041	0.998072	4567	172	0.945749	0.818192	1.09319	0.450494	0.999831	4542	145	0.898806	0.77778	1.03866	0.148208	0.998408	4252	150	0.894427	0.756889	1.05696	0.19029	0.801968	4228	124	0.802
ZNF774	seq.12760.34	0.951028	0.822013	1.10029	0.499634	0.998072	4567	172	0.91178	0.756333	1.09918	0.332821	0.999831	4542	145	0.862201	0.721288	1.03064	0.103423	0.998408	4252	150	0.812444	0.636705	1.03669	0.0948696	0.801521	4228	124	0.802
TARBP2	seq.12781.2	1.04554	0.871507	1.25432	0.631657	0.998072	4567	172	1.09714	0.917052	1.3126	0.310853	0.999831	4542	145	1.04817	0.883117	1.24406	0.590482	0.998408	4252	150	1.13121	0.962426	1.3296	0.134793	0.801521	4228	124	0.802
SGF29	seq.12788.6	0.995507	0.848611	1.16783	0.955915	0.998072	4567	172	0.915166	0.757722	1.10533	0.35739	0.999831	4542	145	0.914078	0.74283	1.12481	0.395987	0.998408	4252	150	0.843616	0.656601	1.0839	0.183532	0.801968	4228	124	0.802
APBB1	seq.12822.34	0.930581	0.788471	1.0983	0.394794	0.998072	4567	172	0.911904	0.761214	1.09242	0.316954	0.999831	4542	145	0.886385	0.741654	1.05936	0.184844	0.998408	4252	150	0.861623	0.703814	1.05482	0.149029	0.801968	4228	124	0.802
TESC	seq.12831.21	1.0471	0.809345	1.35469	0.726169	0.998072	4567	172	1.18321	0.932989	1.50053	0.165199	0.999831	4542	145	1.03921	0.792875	1.36208	0.780526	0.998408	4252	150	1.20136	0.932318	1.54804	0.156126	0.801968	4228	124	0.802
STX10	seq.12842.43	1.01511	0.860608	1.19735	0.858698	0.998072	4567	172	1.05163	0.893361	1.23795	0.545195	0.999831	4542	145	1.08094	0.916817	1.27443	0.354282	0.998408	4252	150	1.1233	0.954738	1.32161	0.161028	0.801968	4228	124	0.802
TEAD3	seq.12854.3	1.11443	0.967088	1.28421	0.134279	0.998072	4567	172	1.13532	0.981146	1.31373	0.0883073	0.999831	4542	145	1.11956	0.96489	1.29903	0.136532	0.998408	4252	150	1.14772	0.984492	1.33802	0.0783546	0.801521	4228	124	0.802
CASS4	seq.12855.16	0.934754	0.681794	1.28157	0.675153	0.998072	4567	172	1.02461	0.748203	1.40313	0.87953	0.999831	4542	145	1.07512	0.798545	1.44749	0.633094	0.998408	4252	150	1.2223	0.922008	1.62039	0.162868	0.801968	4228	124	0.802
ARPP21	seq.12860.7	0.894479	0.738555	1.08332	0.25384	0.998072	4567	172	0.900707	0.72854	1.11356	0.333945	0.999831	4542	145	0.820829	0.670781	1.00444	0.0552421	0.926196	4252	150	0.838851	0.673712	1.04447	0.116176	0.801521	4228	124	0.802
UBTD2	seq.12875.28	0.907881	0.76315	1.08006	0.275385	0.998072	4567	172	0.928579	0.770632	1.1189	0.435995	0.999831	4542	145	0.853523	0.690363	1.05524	0.143407	0.998408	4252	150	0.861403	0.678494	1.09362	0.220536	0.8025	4228	124	0.802
IFI16	seq.12893.159	1.05884	0.884526	1.26751	0.53329	0.998072	4567	172	1.18216	0.988	1.41448	0.067532	0.999831	4542	145	1.05085	0.865166	1.27638	0.617099	0.998408	4252	150	1.1759	0.965481	1.43218	0.107227	0.801521	4228	124	0.802
DGKB	seq.12895.28	0.914492	0.782824	1.06831	0.259764	0.998072	4567	172	0.887786	0.735249	1.07197	0.215913	0.999831	4542	145	0.880397	0.747418	1.03704	0.127332	0.998408	4252	150	0.836177	0.682273	1.0248	0.0847118	0.801521	4228	124	0.802
GCK	seq.12960.9	1.06067	0.870954	1.29171	0.558003	0.998072	4567	172	1.08999	0.878683	1.3521	0.433218	0.999831	4542	145	1.1126	0.901323	1.37339	0.320686	0.998408	4252	150	1.15817	0.917323	1.46225	0.217017	0.801968	4228	124	0.802
NPLOC4	seq.12993.21	0.952686	0.657546	1.3803	0.797774	0.998072	4567	172	1.12525	0.758865	1.66854	0.557111	0.999831	4542	145	1.09475	0.745324	1.60801	0.644424	0.998408	4252	150	1.35043	0.927048	1.96716	0.11751	0.801521	4228	124	0.802
TP53I11	seq.13022.20	1.03435	0.883065	1.21156	0.67547	0.998072	4567	172	1.08124	0.913884	1.27924	0.362618	0.999831	4542	145	1.07212	0.901373	1.27521	0.431396	0.998408	4252	150	1.14243	0.950914	1.37251	0.154922	0.801968	4228	124	0.802
TRAF4	seq.13041.47	0.94182	0.808846	1.09666	0.440188	0.998072	4567	172	0.933821	0.782689	1.11414	0.44717	0.999831	4542	145	0.897338	0.771181	1.04413	0.161123	0.998408	4252	150	0.859305	0.710932	1.03864	0.116898	0.801521	4228	124	0.802
SLC6A14	seq.13053.6	0.953392	0.794956	1.14341	0.606733	0.998072	4567	172	0.907662	0.739887	1.11348	0.352823	0.999831	4542	145	0.934011	0.786644	1.10899	0.435844	0.998408	4252	150	0.86984	0.72795	1.03939	0.124832	0.801521	4228	124	0.802
SLC6A16	seq.13056.18	0.859607	0.720882	1.02503	0.0920434	0.998072	4567	172	0.878547	0.724754	1.06497	0.187223	0.999831	4542	145	0.83345	0.678149	1.02432	0.0833386	0.983043	4252	150	0.837101	0.660336	1.06118	0.141755	0.801968	4228	124	0.802
GLP1R	seq.13085.18	0.845816	0.688811	1.03861	0.109951	0.998072	4567	172	0.834335	0.657614	1.05854	0.135835	0.999831	4542	145	0.852639	0.679731	1.06953	0.167993	0.998408	4252	150	0.829894	0.62706	1.09834	0.192228	0.801968	4228	124	0.802
HIF1A	seq.13089.6	0.992185	0.846048	1.16356	0.923113	0.998072	4567	172	0.938214	0.768519	1.14538	0.530954	0.999831	4542	145	0.93369	0.77668	1.12244	0.465147	0.998408	4252	150	0.857892	0.679955	1.08239	0.196214	0.801968	4228	124	0.802
REG1A	seq.13095.51	1.11271	0.947641	1.30654	0.192374	0.998072	4567	172	1.15333	0.972259	1.36812	0.101603	0.999831	4542	145	1.12848	0.949575	1.34109	0.169913	0.998408	4252	150	1.1752	0.975835	1.4153	0.0887388	0.801521	4228	124	0.802
SOST	seq.13101.60	1.01536	0.857787	1.20189	0.859349	0.998072	4567	172	0.964407	0.802152	1.15948	0.699794	0.999831	4542	145	0.934529	0.771843	1.13151	0.487747	0.998408	4252	150	0.871168	0.703412	1.07893	0.206288	0.801968	4228	124	0.802
EFNB1	seq.13104.32	1.14917	0.971057	1.35994	0.105625	0.998072	4567	172	1.18332	0.984292	1.4226	0.0732145	0.999831	4542	145	1.11972	0.942129	1.33079	0.199347	0.998408	4252	150	1.16591	0.962786	1.41189	0.116021	0.801521	4228	124	0.802
SERPINA10	seq.13119.26	0.901107	0.77875	1.04269	0.161941	0.998072	4567	172	0.907949	0.774357	1.06459	0.234352	0.999831	4542	145	0.854684	0.727185	1.00454	0.056769	0.926638	4252	150	0.855898	0.714488	1.02529	0.0912433	0.801521	4228	124	0.802
LDLR	seq.13129.40	0.958709	0.803443	1.14398	0.639941	0.998072	4567	172	0.860397	0.675278	1.09627	0.223817	0.999831	4542	145	0.856232	0.673318	1.08884	0.20556	0.998408	4252	150	0.749293	0.524352	1.07073	0.113021	0.801521	4228	124	0.802
MDM4	seq.13229.20	0.903931	0.787175	1.03801	0.152322	0.998072	4567	172	0.869671	0.743692	1.01699	0.080295	0.999831	4542	145	0.903678	0.776258	1.05202	0.191521	0.998408	4252	150	0.872794	0.736441	1.03439	0.116452	0.801521	4228	124	0.802
IGHG2	seq.13230.174	0.877752	0.73737	1.04486	0.142522	0.998072	4567	172	0.840178	0.671525	1.05119	0.127678	0.999831	4542	145	0.845863	0.68757	1.0406	0.113296	0.998408	4252	150	0.799444	0.608186	1.05085	0.108608	0.801521	4228	124	0.802
IGHG4	seq.13231.90	1.05158	0.898375	1.2309	0.531315	0.998072	4567	172	1.07846	0.915816	1.26998	0.365147	0.999831	4542	145	1.11743	0.940536	1.3276	0.206667	0.998408	4252	150	1.1453	0.954753	1.37387	0.143941	0.801968	4228	124	0.802
SHANK1	seq.13240.170	1.0865	0.952334	1.23957	0.217311	0.998072	4567	172	1.10364	0.948741	1.28382	0.201239	0.999831	4542	145	1.08489	0.934524	1.25944	0.284457	0.998408	4252	150	1.11882	0.948734	1.31939	0.182049	0.801968	4228	124	0.802
SYNGR3	seq.13375.48	0.905548	0.74077	1.10698	0.332947	0.998072	4567	172	0.908107	0.720652	1.14432	0.413839	0.999831	4542	145	0.798021	0.624506	1.01974	0.0712794	0.957162	4252	150	0.795242	0.594509	1.06375	0.122684	0.801521	4228	124	0.802
CYB561D1	seq.13377.3	1.13582	0.9993	1.291	0.0512625	0.998072	4567	172	1.09716	0.949343	1.26799	0.209155	0.999831	4542	145	1.17999	1.03176	1.34951	0.0156686	0.85496	4252	150	1.1423	0.984198	1.32579	0.0800437	0.801521	4228	124	0.802
FH	seq.13384.110	1.13828	0.942886	1.37417	0.177675	0.998072	4567	172	1.14457	0.938847	1.39538	0.181624	0.999831	4542	145	1.16283	0.965282	1.4008	0.112279	0.998408	4252	150	1.18614	0.981885	1.4329	0.07666	0.801521	4228	124	0.802
DERL1	seq.13393.46	1.06822	0.827016	1.37978	0.613255	0.998072	4567	172	1.1264	0.868257	1.46129	0.370114	0.999831	4542	145	1.16939	0.912934	1.49789	0.215402	0.998408	4252	150	1.23749	0.970641	1.57771	0.0855163	0.801521	4228	124	0.802
RELL1	seq.13399.33	0.896208	0.73781	1.08861	0.269439	0.998072	4567	172	0.799811	0.648886	0.985839	0.0362891	0.999831	4542	145	0.844166	0.688005	1.03577	0.10454	0.998408	4252	150	0.802777	0.631661	1.02025	0.0724769	0.801521	4228	124	0.802
WFDC10A	seq.13429.3	0.960373	0.825656	1.11707	0.600041	0.998072	4567	172	0.934903	0.784377	1.11432	0.452336	0.999831	4542	145	0.881109	0.735709	1.05524	0.168944	0.998408	4252	150	0.860452	0.689524	1.07375	0.183448	0.801968	4228	124	0.802
MAZ	seq.13436.54	1.12239	0.969025	1.30003	0.123498	0.998072	4567	172	1.17351	0.994686	1.38447	0.0578497	0.999831	4542	145	1.07833	0.913977	1.27224	0.371394	0.998408	4252	150	1.13014	0.937184	1.36283	0.200262	0.801968	4228	124	0.802
SPRN	seq.13447.42	1.03536	0.837224	1.28039	0.748482	0.998072	4567	172	1.10729	0.887588	1.38137	0.366425	0.999831	4542	145	1.096	0.875194	1.37252	0.424515	0.998408	4252	150	1.1939	0.952948	1.49577	0.12333	0.801521	4228	124	0.802
SMIM13	seq.13452.113	0.865698	0.71788	1.04395	0.131116	0.998072	4567	172	0.902323	0.745226	1.09254	0.292265	0.999831	4542	145	0.782851	0.629221	0.973992	0.0280609	0.87466	4252	150	0.82941	0.661704	1.03962	0.104615	0.801521	4228	124	0.802
ARFIP1	seq.13488.3	0.98956	0.7266	1.34769	0.946903	0.998072	4567	172	1.13719	0.833112	1.55226	0.418029	0.999831	4542	145	1.05227	0.765474	1.44652	0.753648	0.998408	4252	150	1.24521	0.910354	1.70324	0.169974	0.801968	4228	124	0.802
CERS5	seq.13494.6	1.11611	0.974119	1.27881	0.113581	0.998072	4567	172	1.10802	0.955836	1.28443	0.173585	0.999831	4542	145	1.12319	0.971527	1.29854	0.116485	0.998408	4252	150	1.13062	0.970447	1.31724	0.11523	0.801521	4228	124	0.802
EIF3J	seq.13497.34	0.978913	0.697342	1.37418	0.901979	0.998072	4567	172	1.06504	0.759816	1.49289	0.714553	0.999831	4542	145	1.12849	0.812087	1.56817	0.471478	0.998408	4252	150	1.23459	0.901778	1.69022	0.188541	0.801968	4228	124	0.802
SATB1	seq.13511.29	0.816406	0.66583	1.00104	0.0511704	0.998072	4567	172	0.844205	0.67144	1.06142	0.147135	0.999831	4542	145	0.789625	0.615805	1.01251	0.0626034	0.939686	4252	150	0.831225	0.627347	1.10136	0.197903	0.801968	4228	124	0.802
PTCHD3	seq.13517.3	0.951009	0.816477	1.10771	0.518603	0.998072	4567	172	0.911199	0.759084	1.0938	0.318325	0.999831	4542	145	0.898801	0.75642	1.06798	0.225309	0.998408	4252	150	0.865069	0.699339	1.07007	0.181609	0.801968	4228	124	0.802
KCNN1	seq.13539.131	0.984326	0.857749	1.12958	0.822017	0.998072	4567	172	0.891947	0.768822	1.03479	0.131362	0.999831	4542	145	0.964388	0.830984	1.11921	0.633102	0.998408	4252	150	0.869887	0.738754	1.0243	0.0945184	0.801521	4228	124	0.802
EIF1AD	seq.13545.97	1.11835	0.947185	1.32044	0.18691	0.998072	4567	172	1.16604	0.992528	1.36989	0.061656	0.999831	4542	145	1.06988	0.896168	1.27726	0.454931	0.998408	4252	150	1.12185	0.950234	1.32445	0.174668	0.801968	4228	124	0.802
SWAP70	seq.13552.7	0.876109	0.738721	1.03905	0.128552	0.998072	4567	172	0.897012	0.748395	1.07514	0.239585	0.999831	4542	145	0.853113	0.704643	1.03287	0.103418	0.998408	4252	150	0.869956	0.706497	1.07123	0.189528	0.801968	4228	124	0.802
RBL2	seq.13565.2	1.12854	0.973073	1.30884	0.10981	0.998072	4567	172	1.07416	0.903569	1.27696	0.417495	0.999831	4542	145	1.21202	1.04432	1.40665	0.0113809	0.85496	4252	150	1.14409	0.958431	1.3657	0.136219	0.801521	4228	124	0.802
DPYSL2	seq.13567.1	1.07018	0.921881	1.24234	0.372795	0.998072	4567	172	1.06946	0.913953	1.25143	0.402218	0.999831	4542	145	1.09181	0.930698	1.2808	0.280901	0.998408	4252	150	1.12711	0.952611	1.33357	0.163231	0.801968	4228	124	0.802
GSTP1	seq.13576.15	1.108	0.916702	1.33922	0.288881	0.998072	4567	172	1.13892	0.948003	1.36829	0.164654	0.999831	4542	145	1.126	0.921162	1.37639	0.246701	0.998408	4252	150	1.1599	0.959368	1.40234	0.125603	0.801521	4228	124	0.802
APAF1	seq.13583.19	0.800615	0.6594	0.972072	0.0246973	0.998072	4567	172	0.820756	0.670044	1.00537	0.0563547	0.999831	4542	145	0.857428	0.716327	1.02632	0.0935859	0.99316	4252	150	0.879896	0.733916	1.05491	0.166845	0.801968	4228	124	0.802
REXO2	seq.13590.1	1.07387	0.854858	1.34899	0.540263	0.998072	4567	172	1.17405	0.943298	1.46126	0.150666	0.999831	4542	145	1.12066	0.875109	1.43512	0.366636	0.998408	4252	150	1.23648	0.974371	1.5691	0.080742	0.801521	4228	124	0.802
RAB31	seq.13597.20	0.956669	0.664092	1.37815	0.812	0.998072	4567	172	1.12631	0.787747	1.61039	0.514342	0.999831	4542	145	1.07753	0.743147	1.56238	0.693631	0.998408	4252	150	1.29117	0.929687	1.7932	0.127274	0.801521	4228	124	0.802
AK5	seq.13613.23	1.11058	0.972019	1.2689	0.122928	0.998072	4567	172	1.10045	0.949953	1.27479	0.202056	0.999831	4542	145	1.14062	0.996623	1.30542	0.0560208	0.926638	4252	150	1.14102	0.982006	1.32578	0.0849143	0.801521	4228	124	0.802
CREBBP	seq.13614.6	1.05594	0.9055	1.23137	0.487612	0.998072	4567	172	1.08401	0.92261	1.27365	0.326724	0.999831	4542	145	1.1306	0.968249	1.32017	0.120655	0.998408	4252	150	1.13826	0.963009	1.34539	0.128983	0.801521	4228	124	0.802
AP2A2	seq.13621.31	0.986948	0.724185	1.34505	0.93371	0.998072	4567	172	1.16791	0.845936	1.61244	0.345551	0.999831	4542	145	1.08145	0.775168	1.50875	0.644857	0.998408	4252	150	1.31399	0.942086	1.83272	0.10771	0.801521	4228	124	0.802
PPP2R5A	seq.13622.16	0.987087	0.738855	1.31872	0.92992	0.998072	4567	172	1.12725	0.831889	1.52748	0.439705	0.999831	4542	145	1.04368	0.775452	1.40468	0.777901	0.998408	4252	150	1.21329	0.898772	1.63788	0.206636	0.801968	4228	124	0.802
NADK	seq.13624.17	0.909918	0.7412	1.11704	0.366958	0.998072	4567	172	0.85595	0.66757	1.09749	0.220016	0.999831	4542	145	0.870529	0.683888	1.1081	0.260073	0.998408	4252	150	0.835276	0.626444	1.11372	0.220117	0.801968	4228	124	0.802
BCL6	seq.13640.5	0.951605	0.796595	1.13678	0.584502	0.998072	4567	172	0.849243	0.653128	1.10425	0.222544	0.999831	4542	145	0.909284	0.739522	1.11802	0.367081	0.998408	4252	150	0.820523	0.605427	1.11204	0.202187	0.801968	4228	124	0.802
PNKP	seq.13657.2	1.03189	0.819082	1.29998	0.789943	0.998072	4567	172	1.16057	0.930265	1.44789	0.187008	0.999831	4542	145	1.0462	0.831245	1.31674	0.700319	0.998408	4252	150	1.18639	0.953207	1.47661	0.125824	0.801521	4228	124	0.802
PDGFC	seq.13658.31	1.09917	0.945791	1.27742	0.217522	0.998072	4567	172	1.05468	0.872279	1.27521	0.582666	0.999831	4542	145	1.14987	0.995598	1.32805	0.0574355	0.926638	4252	150	1.12271	0.940109	1.34078	0.201228	0.801968	4228	124	0.802
ANGPT2	seq.13660.76	0.921912	0.759644	1.11884	0.410431	0.998072	4567	172	0.875706	0.707781	1.08347	0.221739	0.999831	4542	145	0.920586	0.746042	1.13597	0.440445	0.998408	4252	150	0.848944	0.66981	1.07599	0.175635	0.801968	4228	124	0.802
CLCNKB	seq.13683.18	1.15519	0.973118	1.37133	0.09923	0.998072	4567	172	1.13718	0.939514	1.37642	0.186987	0.999831	4542	145	1.1805	0.976447	1.42719	0.086561	0.983043	4252	150	1.17634	0.955522	1.4482	0.125749	0.801521	4228	124	0.802
CAPSL	seq.13688.2	0.865317	0.726794	1.03024	0.104109	0.998072	4567	172	0.80432	0.641863	1.0079	0.0585343	0.999831	4542	145	0.855839	0.70906	1.033	0.104856	0.998408	4252	150	0.80208	0.626516	1.02684	0.0801434	0.801521	4228	124	0.802
CDNF	seq.13693.5	0.885044	0.748631	1.04631	0.15275	0.998072	4567	172	0.885188	0.729246	1.07448	0.217403	0.999831	4542	145	0.842828	0.696339	1.02013	0.0791948	0.980121	4252	150	0.858928	0.68994	1.06931	0.173672	0.801968	4228	124	0.802
IL12RB1	seq.13706.12	0.922233	0.79028	1.07622	0.304122	0.998072	4567	172	0.84998	0.712016	1.01468	0.0720579	0.999831	4542	145	0.916629	0.78353	1.07234	0.276814	0.998408	4252	150	0.86765	0.721069	1.04403	0.132671	0.801521	4228	124	0.802
SERPING1	seq.13710.6	0.904978	0.763897	1.07212	0.24822	0.998072	4567	172	0.85463	0.708046	1.03156	0.101771	0.999831	4542	145	0.928778	0.768259	1.12283	0.445328	0.998408	4252	150	0.862503	0.696691	1.06778	0.174481	0.801968	4228	124	0.802
SEC22A	seq.13713.164	1.05086	0.856332	1.28959	0.634778	0.998072	4567	172	1.10032	0.882214	1.37236	0.396339	0.999831	4542	145	1.07136	0.876334	1.30979	0.50135	0.998408	4252	150	1.14315	0.929942	1.40524	0.203966	0.801968	4228	124	0.802
FGF16	seq.13725.3	0.976994	0.838391	1.13851	0.765577	0.998072	4567	172	0.927339	0.780438	1.10189	0.391278	0.999831	4542	145	0.932708	0.789651	1.10168	0.412189	0.998408	4252	150	0.856928	0.708068	1.03708	0.112746	0.801521	4228	124	0.802
CD80	seq.13726.4	1.13549	1.00175	1.28707	0.0468765	0.998072	4567	172	1.10593	0.951699	1.28515	0.188869	0.999831	4542	145	1.15334	1.00248	1.32689	0.0460776	0.92329	4252	150	1.13417	0.961144	1.33834	0.136032	0.801521	4228	124	0.802
ERP29	seq.13728.19	1.01877	0.716334	1.4489	0.917569	0.998072	4567	172	1.15872	0.804653	1.66857	0.428483	0.999831	4542	145	1.142	0.79353	1.64348	0.474687	0.998408	4252	150	1.33259	0.935869	1.89748	0.111293	0.801521	4228	124	0.802
CTF1	seq.13732.79	1.09588	0.91197	1.31688	0.328639	0.998072	4567	172	1.1245	0.923255	1.36961	0.243491	0.999831	4542	145	1.1105	0.914421	1.34864	0.290315	0.998408	4252	150	1.14639	0.929213	1.41433	0.202346	0.801968	4228	124	0.802
IL12B	seq.13733.5	1.1904	1.01422	1.39717	0.0329378	0.998072	4567	172	1.1455	0.958638	1.36878	0.134895	0.999831	4542	145	1.16152	0.970768	1.38975	0.101869	0.998408	4252	150	1.15482	0.941086	1.41711	0.168046	0.801968	4228	124	0.802
IFNL1	seq.13734.22	1.09121	0.950647	1.25256	0.214741	0.998072	4567	172	1.10205	0.942265	1.28894	0.224025	0.999831	4542	145	1.10157	0.954789	1.27091	0.184882	0.998408	4252	150	1.11605	0.950323	1.31067	0.180662	0.801968	4228	124	0.802
INHBA	seq.13738.8	0.915883	0.763318	1.09894	0.344587	0.998072	4567	172	0.874102	0.724145	1.05511	0.161125	0.999831	4542	145	0.927307	0.755354	1.13841	0.470773	0.998408	4252	150	0.864607	0.698418	1.07034	0.181608	0.801968	4228	124	0.802
PKD2	seq.13745.10	0.977796	0.82413	1.16011	0.796858	0.998072	4567	172	0.932157	0.753389	1.15334	0.517818	0.999831	4542	145	0.852166	0.689664	1.05296	0.138349	0.998408	4252	150	0.811604	0.619631	1.06305	0.129535	0.801521	4228	124	0.802
CA6	seq.13747.9	0.882596	0.74662	1.04334	0.143462	0.998072	4567	172	0.844857	0.702505	1.01605	0.0733235	0.999831	4542	145	0.891527	0.741698	1.07162	0.221285	0.998408	4252	150	0.856725	0.699088	1.04991	0.13608	0.801521	4228	124	0.802
APOBEC3G	seq.13930.3	0.934004	0.669	1.30398	0.688407	0.998072	4567	172	1.10371	0.784732	1.55235	0.570689	0.999831	4542	145	1.06689	0.761562	1.49463	0.706598	0.998408	4252	150	1.27919	0.919945	1.77872	0.143218	0.801968	4228	124	0.802
PSMD9	seq.13931.22	0.978244	0.814674	1.17465	0.813721	0.998072	4567	172	1.05328	0.87383	1.26958	0.585939	0.999831	4542	145	1.06131	0.879262	1.28104	0.535418	0.998408	4252	150	1.1519	0.952344	1.39326	0.145138	0.801968	4228	124	0.802
MCF2L	seq.13934.3	1.125	0.909692	1.39128	0.277153	0.998072	4567	172	1.1064	0.8917	1.3728	0.358294	0.999831	4542	145	1.18336	0.961734	1.45605	0.111559	0.998408	4252	150	1.17245	0.945978	1.45314	0.146267	0.801968	4228	124	0.802
SPSB1	seq.13942.140	0.904094	0.73672	1.10949	0.334417	0.998072	4567	172	0.902336	0.717074	1.13546	0.38076	0.999831	4542	145	0.856194	0.681787	1.07522	0.18156	0.998408	4252	150	0.849423	0.656706	1.09869	0.213839	0.801968	4228	124	0.802
GABBR2	seq.13948.50	1.03409	0.916017	1.16738	0.587876	0.998072	4567	172	1.07495	0.945318	1.22236	0.27032	0.999831	4542	145	1.04873	0.923295	1.19121	0.4641	0.998408	4252	150	1.0985	0.956165	1.26203	0.184541	0.801968	4228	124	0.802
CERT1	seq.13950.9	0.978374	0.7139	1.34083	0.891844	0.998072	4567	172	1.11368	0.801397	1.54764	0.521335	0.999831	4542	145	1.05455	0.770852	1.44267	0.73972	0.998408	4252	150	1.22832	0.893327	1.68894	0.205612	0.801968	4228	124	0.802
RBM46	seq.13958.5	0.934583	0.794524	1.09933	0.41408	0.998072	4567	172	0.859299	0.69593	1.06102	0.158699	0.999831	4542	145	0.916115	0.770118	1.08979	0.322572	0.998408	4252	150	0.822011	0.655039	1.03155	0.0906639	0.801521	4228	124	0.802
AGAP3	seq.13960.15	0.952592	0.797859	1.13733	0.591231	0.998072	4567	172	0.940149	0.768773	1.14973	0.547784	0.999831	4542	145	0.87535	0.72957	1.05026	0.152029	0.998408	4252	150	0.867879	0.705239	1.06803	0.180767	0.801968	4228	124	0.802
KIF3A	seq.13961.18	1.04158	0.87526	1.23951	0.646237	0.998072	4567	172	1.01732	0.848298	1.22002	0.853027	0.999831	4542	145	1.14632	0.94888	1.38484	0.156799	0.998408	4252	150	1.13881	0.935622	1.38613	0.19485	0.801968	4228	124	0.802
KPNA6	seq.13969.24	0.959483	0.694759	1.32508	0.801728	0.998072	4567	172	1.13192	0.812404	1.5771	0.464001	0.999831	4542	145	1.06912	0.758879	1.50618	0.702323	0.998408	4252	150	1.28784	0.917548	1.80758	0.143602	0.801968	4228	124	0.802
CRYZ	seq.13983.27	1.07462	0.922332	1.25205	0.355995	0.998072	4567	172	1.12146	0.952913	1.31981	0.167731	0.999831	4542	145	1.09014	0.927156	1.28178	0.296208	0.998408	4252	150	1.13885	0.959039	1.35236	0.138085	0.801521	4228	124	0.802
LANCL1	seq.13986.6	1.01305	0.773921	1.32605	0.924826	0.998072	4567	172	1.12343	0.859311	1.46873	0.394685	0.999831	4542	145	1.04658	0.782854	1.39914	0.758588	0.998408	4252	150	1.24482	0.94496	1.63984	0.119378	0.801521	4228	124	0.802
PC	seq.13990.1	0.906682	0.774696	1.06115	0.222278	0.998072	4567	172	0.864846	0.722069	1.03586	0.114721	0.999831	4542	145	0.860028	0.71518	1.03421	0.109045	0.998408	4252	150	0.846919	0.687351	1.04353	0.118774	0.801521	4228	124	0.802
DOCK9	seq.14002.18	0.963499	0.831076	1.11702	0.622064	0.998072	4567	172	0.938901	0.791058	1.11437	0.470789	0.999831	4542	145	0.890473	0.744457	1.06513	0.20426	0.998408	4252	150	0.845766	0.681447	1.04971	0.128546	0.801521	4228	124	0.802
CHD7	seq.14005.2	0.970108	0.808519	1.16399	0.744082	0.998072	4567	172	0.908219	0.711985	1.15854	0.438267	0.999831	4542	145	0.84087	0.674271	1.04863	0.123933	0.998408	4252	150	0.784381	0.582651	1.05596	0.109363	0.801521	4228	124	0.802
GNMT	seq.14006.36	0.892735	0.749779	1.06295	0.20253	0.998072	4567	172	0.868613	0.708026	1.06562	0.176828	0.999831	4542	145	0.885537	0.725423	1.08099	0.232223	0.998408	4252	150	0.854381	0.670693	1.08838	0.202563	0.801968	4228	124	0.802
MED4	seq.14021.81	1.0085	0.837155	1.21492	0.929001	0.998072	4567	172	0.925867	0.732326	1.17056	0.519723	0.999831	4542	145	0.963036	0.787567	1.1776	0.713608	0.998408	4252	150	0.842421	0.673835	1.05319	0.132288	0.801521	4228	124	0.802
COPS2	seq.14029.42	1.02378	0.804125	1.30343	0.848741	0.998072	4567	172	1.09742	0.854145	1.40999	0.467199	0.999831	4542	145	1.08008	0.837788	1.39244	0.552258	0.998408	4252	150	1.1849	0.909418	1.54384	0.208867	0.801968	4228	124	0.802
CST7	seq.14038.130	1.02027	0.865804	1.2023	0.81063	0.998072	4567	172	1.07814	0.914275	1.27138	0.371054	0.999831	4542	145	1.0641	0.893046	1.26791	0.487151	0.998408	4252	150	1.14125	0.959169	1.35789	0.136254	0.801521	4228	124	0.802
IL7	seq.14049.17	1.09041	0.941467	1.26293	0.248051	0.998072	4567	172	1.12505	0.960211	1.31819	0.144924	0.999831	4542	145	1.08954	0.927093	1.28046	0.297852	0.998408	4252	150	1.12392	0.94184	1.34119	0.195148	0.801968	4228	124	0.802
FOXC2	seq.14051.54	0.92632	0.784497	1.09378	0.366681	0.998072	4567	172	0.945948	0.784262	1.14097	0.561214	0.999831	4542	145	0.821698	0.67537	0.99973	0.0496807	0.926196	4252	150	0.82918	0.662714	1.03746	0.101349	0.801521	4228	124	0.802
TNFSF11	seq.14061.48	0.980806	0.852583	1.12831	0.786289	0.998072	4567	172	0.973954	0.836446	1.13407	0.733971	0.999831	4542	145	0.881147	0.744986	1.04219	0.139556	0.998408	4252	150	0.881944	0.729108	1.06682	0.195719	0.801968	4228	124	0.802
OSM	seq.14063.17	0.97716	0.836406	1.1416	0.770933	0.998072	4567	172	0.941182	0.802246	1.10418	0.456953	0.999831	4542	145	0.843501	0.708055	1.00486	0.0566844	0.926638	4252	150	0.846578	0.690169	1.03843	0.110012	0.801521	4228	124	0.802
PGLYRP1	seq.14064.21	0.86789	0.719685	1.04662	0.138051	0.998072	4567	172	0.854556	0.688509	1.06065	0.153915	0.999831	4542	145	0.833145	0.661761	1.04892	0.120288	0.998408	4252	150	0.815882	0.624492	1.06593	0.135724	0.801521	4228	124	0.802
CCL25	seq.14068.29	1.15852	0.989597	1.35628	0.0672572	0.998072	4567	172	1.17748	0.991477	1.39837	0.062544	0.999831	4542	145	1.12146	0.950901	1.32262	0.173234	0.998408	4252	150	1.14424	0.957042	1.36804	0.139337	0.801968	4228	124	0.802
CA4	seq.14069.61	0.894102	0.703901	1.1357	0.359005	0.998072	4567	172	0.926535	0.711417	1.2067	0.571336	0.999831	4542	145	0.765201	0.564455	1.03734	0.0847361	0.983043	4252	150	0.767767	0.536565	1.09859	0.14828	0.801968	4228	124	0.802
FCN3	seq.14077.6	0.880558	0.753207	1.02944	0.110504	0.998072	4567	172	0.880205	0.741014	1.04554	0.146249	0.999831	4542	145	0.87187	0.734998	1.03423	0.115556	0.998408	4252	150	0.867487	0.71462	1.05305	0.150625	0.801968	4228	124	0.802
PSMA4	seq.14099.20	1.01275	0.856483	1.19752	0.882224	0.998072	4567	172	0.894118	0.72071	1.10925	0.308955	0.999831	4542	145	0.958163	0.79539	1.15425	0.652782	0.998408	4252	150	0.852803	0.666037	1.09194	0.20675	0.801968	4228	124	0.802
TRIL	seq.14104.1	0.95174	0.801555	1.13006	0.572402	0.998072	4567	172	0.94313	0.776049	1.14618	0.556165	0.999831	4542	145	0.885456	0.737353	1.06331	0.192683	0.998408	4252	150	0.863983	0.702924	1.06194	0.16483	0.801968	4228	124	0.802
SPARC	seq.14110.200	0.863474	0.686161	1.08661	0.210671	0.998072	4567	172	0.788839	0.627501	0.991658	0.0421783	0.999831	4542	145	0.921831	0.738549	1.1506	0.471731	0.998408	4252	150	0.850344	0.681715	1.06069	0.150558	0.801968	4228	124	0.802
TNFRSF10D	seq.14121.24	0.927097	0.771706	1.11378	0.418672	0.998072	4567	172	0.88529	0.734935	1.06641	0.1995	0.999831	4542	145	0.891691	0.729334	1.09019	0.263609	0.998408	4252	150	0.847183	0.693594	1.03478	0.104167	0.801521	4228	124	0.802
H2BC21	seq.14143.8	1.14286	0.919787	1.42004	0.228088	0.998072	4567	172	1.25754	0.997136	1.58595	0.0528959	0.999831	4542	145	1.09365	0.854114	1.40037	0.477849	0.998408	4252	150	1.20619	0.919839	1.58167	0.175186	0.801968	4228	124	0.802
H2AW	seq.14144.3	1.16228	0.935117	1.44462	0.175297	0.998072	4567	172	1.272	1.01094	1.60048	0.0400916	0.999831	4542	145	1.11626	0.871962	1.42901	0.382783	0.998408	4252	150	1.21658	0.929898	1.59165	0.152748	0.801968	4228	124	0.802
ISG15	seq.14151.4	0.978395	0.8116	1.17947	0.818836	0.998072	4567	172	1.06865	0.894282	1.27702	0.465035	0.999831	4542	145	1.0139	0.826505	1.24377	0.894698	0.998408	4252	150	1.14576	0.949015	1.38328	0.156901	0.801968	4228	124	0.802
CDKN3	seq.14178.18	1.08146	0.946252	1.23599	0.250457	0.998072	4567	172	1.11781	0.978155	1.27741	0.101917	0.999831	4542	145	1.0764	0.924899	1.25272	0.341466	0.998408	4252	150	1.13243	0.974882	1.31543	0.103705	0.801521	4228	124	0.802
PDCL2	seq.14192.31	1.0903	0.909593	1.3069	0.349757	0.998072	4567	172	1.11775	0.919214	1.35916	0.264551	0.999831	4542	145	1.15484	0.96061	1.38834	0.125457	0.998408	4252	150	1.18316	0.967707	1.44658	0.10102	0.801521	4228	124	0.802
ANXA7	seq.14203.3	0.933489	0.694218	1.25523	0.648737	0.998072	4567	172	1.11944	0.825742	1.51759	0.467403	0.999831	4542	145	1.01719	0.737888	1.40221	0.917129	0.998408	4252	150	1.24864	0.899448	1.7334	0.184576	0.801968	4228	124	0.802
RAB6B	seq.14271.23	0.945462	0.68636	1.30237	0.73144	0.998072	4567	172	1.05075	0.738934	1.49416	0.782837	0.999831	4542	145	1.10066	0.792228	1.52918	0.567522	0.998408	4252	150	1.27587	0.901867	1.80498	0.168684	0.801968	4228	124	0.802
UBE2E1	seq.14326.4	0.971918	0.736345	1.28285	0.840594	0.998072	4567	172	1.17584	0.904495	1.52859	0.226235	0.999831	4542	145	1.02705	0.758828	1.39009	0.862756	0.998408	4252	150	1.25927	0.958394	1.65461	0.0979381	0.801521	4228	124	0.802
DIPK1C	seq.14341.8	1.07002	0.922128	1.24164	0.372509	0.998072	4567	172	1.0973	0.94208	1.27808	0.232782	0.999831	4542	145	1.07246	0.921933	1.24756	0.364632	0.998408	4252	150	1.10818	0.949474	1.29341	0.19273	0.801968	4228	124	0.802
MSTN	seq.14583.49	0.896271	0.753411	1.06622	0.21638	0.998072	4567	172	0.889596	0.736643	1.07431	0.224224	0.999831	4542	145	0.843141	0.697205	1.01962	0.0784789	0.980121	4252	150	0.82789	0.670898	1.02162	0.0783014	0.801521	4228	124	0.802
FAM210A	seq.14593.152	1.05693	0.881593	1.26715	0.549647	0.998072	4567	172	1.1027	0.89421	1.35981	0.360562	0.999831	4542	145	1.13565	0.936409	1.37729	0.196199	0.998408	4252	150	1.1975	0.955707	1.50047	0.117278	0.801521	4228	124	0.802
SEMA6C	seq.14597.5	0.894308	0.744863	1.07374	0.231156	0.998072	4567	172	0.890408	0.718589	1.10331	0.288608	0.999831	4542	145	0.835194	0.67049	1.04036	0.108062	0.998408	4252	150	0.816701	0.623334	1.07005	0.141878	0.801968	4228	124	0.802
KIAA0040	seq.14603.51	1.06227	0.849887	1.32771	0.595578	0.998072	4567	172	1.06875	0.847688	1.34746	0.57387	0.999831	4542	145	1.25341	0.994644	1.5795	0.055559	0.926196	4252	150	1.2421	0.971914	1.5874	0.0832079	0.801521	4228	124	0.802
GSTA4	seq.14645.253	0.954262	0.823333	1.10601	0.534084	0.998072	4567	172	0.868454	0.738752	1.02093	0.0874453	0.999831	4542	145	0.98899	0.848574	1.15264	0.887309	0.998408	4252	150	0.889144	0.751502	1.052	0.170914	0.801968	4228	124	0.802
SKIL	seq.14670.1	0.975543	0.704736	1.35041	0.881354	0.998072	4567	172	1.08256	0.785964	1.49107	0.627247	0.999831	4542	145	1.10895	0.805417	1.52686	0.526228	0.998408	4252	150	1.23952	0.92158	1.66715	0.155622	0.801968	4228	124	0.802
TPSB2	seq.14696.45	0.87192	0.739908	1.02749	0.10178	0.998072	4567	172	0.875855	0.731184	1.04915	0.150123	0.999831	4542	145	0.871782	0.726978	1.04543	0.138711	0.998408	4252	150	0.87395	0.711171	1.07399	0.200113	0.801968	4228	124	0.802
C8G	seq.14708.59	0.91766	0.756639	1.11295	0.382711	0.998072	4567	172	0.888789	0.721498	1.09487	0.267815	0.999831	4542	145	0.889984	0.7233	1.09508	0.270647	0.998408	4252	150	0.835003	0.666007	1.04688	0.118076	0.801521	4228	124	0.802
CRLF1	seq.14747.9	0.862518	0.720363	1.03273	0.107494	0.998072	4567	172	0.861078	0.708677	1.04625	0.132316	0.999831	4542	145	0.876014	0.724328	1.05946	0.172394	0.998408	4252	150	0.85259	0.68662	1.05868	0.148803	0.801968	4228	124	0.802
IGF2	seq.15295.81	1.14699	0.960909	1.36911	0.128893	0.998072	4567	172	1.10928	0.924388	1.33116	0.264913	0.999831	4542	145	1.18051	0.979287	1.42307	0.0817763	0.980121	4252	150	1.14298	0.943939	1.38398	0.171006	0.801968	4228	124	0.802
CCDC134	seq.15300.66	0.996723	0.764968	1.29869	0.980602	0.998072	4567	172	1.05196	0.808291	1.36909	0.706315	0.999831	4542	145	1.08337	0.840769	1.39597	0.535858	0.998408	4252	150	1.16804	0.915393	1.49041	0.211633	0.801968	4228	124	0.802
CPLX2	seq.15321.8	1.15262	0.963582	1.37875	0.12016	0.998072	4567	172	1.14501	0.941971	1.39181	0.173919	0.999831	4542	145	1.15862	0.942916	1.42367	0.161282	0.998408	4252	150	1.1837	0.953218	1.46991	0.126921	0.801521	4228	124	0.802
SDF2	seq.15333.11	1.11298	0.969966	1.27709	0.127149	0.998072	4567	172	1.14817	0.99149	1.32962	0.064917	0.999831	4542	145	1.08602	0.937357	1.25826	0.271906	0.998408	4252	150	1.13954	0.973388	1.33406	0.104256	0.801521	4228	124	0.802
KNG1	seq.15343.337	1.1537	0.989151	1.34562	0.0685969	0.998072	4567	172	1.16439	0.980675	1.38251	0.0823424	0.999831	4542	145	1.174	0.991808	1.38966	0.0622661	0.939686	4252	150	1.19037	0.984616	1.43911	0.0718814	0.801521	4228	124	0.802
ANKRD1	seq.15361.37	0.909869	0.763253	1.08465	0.292063	0.998072	4567	172	0.863851	0.684276	1.09055	0.218344	0.999831	4542	145	0.862543	0.6953	1.07001	0.17874	0.998408	4252	150	0.810429	0.603779	1.08781	0.161638	0.801968	4228	124	0.802
ADGRB3	seq.15365.41	0.880217	0.71708	1.08047	0.22248	0.998072	4567	172	0.797034	0.601177	1.0567	0.114866	0.999831	4542	145	0.844121	0.676422	1.0534	0.133704	0.998408	4252	150	0.779239	0.573048	1.05962	0.111676	0.801521	4228	124	0.802
BRD2	seq.15372.43	0.970516	0.817777	1.15178	0.731934	0.998072	4567	172	0.931435	0.78633	1.10332	0.411041	0.999831	4542	145	0.909389	0.751359	1.10066	0.329431	0.998408	4252	150	0.886165	0.731882	1.07297	0.215602	0.801968	4228	124	0.802
GKN1	seq.15374.15	1.11526	0.973669	1.27744	0.115304	0.998072	4567	172	1.14632	0.982185	1.33788	0.0832713	0.999831	4542	145	1.09188	0.933108	1.27766	0.272907	0.998408	4252	150	1.13876	0.95007	1.36493	0.159768	0.801968	4228	124	0.802
CTSE	seq.15376.134	0.928487	0.786218	1.0965	0.381904	0.998072	4567	172	0.867249	0.716918	1.0491	0.142521	0.999831	4542	145	0.928548	0.781202	1.10369	0.400391	0.998408	4252	150	0.850583	0.697258	1.03762	0.11053	0.801521	4228	124	0.802
ID1	seq.15402.2	0.861322	0.721483	1.02826	0.0986095	0.998072	4567	172	0.880723	0.7344	1.0562	0.170635	0.999831	4542	145	0.829167	0.682358	1.00756	0.0595347	0.929439	4252	150	0.874642	0.725573	1.05434	0.160027	0.801968	4228	124	0.802
MMP20	seq.15419.15	0.925252	0.782209	1.09445	0.364578	0.998072	4567	172	0.852069	0.709408	1.02342	0.0868274	0.999831	4542	145	0.914832	0.768124	1.08956	0.318194	0.998408	4252	150	0.866157	0.707535	1.06034	0.163836	0.801968	4228	124	0.802
OTC	seq.15431.31	0.933629	0.791083	1.10186	0.416531	0.998072	4567	172	0.908594	0.755502	1.09271	0.308566	0.999831	4542	145	0.888257	0.740742	1.06515	0.200953	0.998408	4252	150	0.85617	0.701192	1.0454	0.127465	0.801521	4228	124	0.802
PNP	seq.15435.4	1.0384	0.765598	1.4084	0.80855	0.998072	4567	172	1.22038	0.903979	1.64753	0.193357	0.999831	4542	145	1.11188	0.802005	1.54149	0.524596	0.998408	4252	150	1.32479	0.965136	1.81846	0.0817873	0.801521	4228	124	0.802
TIMD4	seq.15449.33	1.07851	0.924296	1.25846	0.33703	0.998072	4567	172	1.06337	0.897078	1.26049	0.478842	0.999831	4542	145	1.14038	0.966746	1.34519	0.119069	0.998408	4252	150	1.12387	0.939482	1.34446	0.201516	0.801968	4228	124	0.802
NT5E	seq.15452.5	0.849146	0.700257	1.02969	0.0964079	0.998072	4567	172	0.827757	0.674614	1.01567	0.0701286	0.999831	4542	145	0.884414	0.725684	1.07786	0.22358	0.998408	4252	150	0.853729	0.686058	1.06238	0.15631	0.801968	4228	124	0.802
AMBP	seq.15453.3	1.08458	0.876461	1.34211	0.455118	0.998072	4567	172	1.25927	1.00792	1.5733	0.0424118	0.999831	4542	145	1.04662	0.820502	1.33505	0.713686	0.998408	4252	150	1.23667	0.954453	1.60232	0.107995	0.801521	4228	124	0.802
ANPEP	seq.15457.14	1.09394	0.900746	1.32857	0.365128	0.998072	4567	172	1.10576	0.887658	1.37746	0.369783	0.999831	4542	145	1.12348	0.911196	1.38523	0.275859	0.998408	4252	150	1.16032	0.919752	1.46381	0.209717	0.801968	4228	124	0.802
COL9A1	seq.15466.30	0.901783	0.734025	1.10788	0.324903	0.998072	4567	172	0.858445	0.672399	1.09597	0.220685	0.999831	4542	145	0.863528	0.676534	1.10221	0.238626	0.998408	4252	150	0.831405	0.629185	1.09862	0.194103	0.801968	4228	124	0.802
LRP11	seq.15472.16	1.18379	0.966485	1.44995	0.102986	0.998072	4567	172	1.14359	0.913738	1.43127	0.241195	0.999831	4542	145	1.21331	0.97318	1.51269	0.085727	0.983043	4252	150	1.16606	0.912439	1.49018	0.219551	0.801968	4228	124	0.802
PIN1	seq.15474.7	0.946727	0.694016	1.29146	0.729682	0.998072	4567	172	1.12455	0.829402	1.52472	0.449819	0.999831	4542	145	1.02611	0.745796	1.41179	0.874181	0.998408	4252	150	1.22007	0.900465	1.6531	0.199326	0.801968	4228	124	0.802
NAGLU	seq.15509.2	0.948957	0.781422	1.15241	0.597053	0.998072	4567	172	0.8471	0.694438	1.03332	0.101696	0.999831	4542	145	0.937195	0.761551	1.15335	0.540148	0.998408	4252	150	0.839288	0.672862	1.04688	0.120252	0.801521	4228	124	0.802
SAA1	seq.15515.2	1.16046	1.00505	1.3399	0.0424855	0.998072	4567	172	1.10438	0.94682	1.28816	0.206166	0.999831	4542	145	1.2138	1.03574	1.42247	0.016671	0.857608	4252	150	1.16532	0.980856	1.38448	0.081833	0.801521	4228	124	0.802
GLIPR2	seq.15522.2	0.994615	0.823614	1.20112	0.955268	0.998072	4567	172	0.903856	0.744624	1.09714	0.306602	0.999831	4542	145	0.941901	0.760395	1.16673	0.583662	0.998408	4252	150	0.827582	0.667999	1.02529	0.0833615	0.801521	4228	124	0.802
PGAM2	seq.15524.30	0.854519	0.691772	1.05555	0.144714	0.998072	4567	172	0.846132	0.675247	1.06026	0.146611	0.999831	4542	145	0.754331	0.582995	0.976021	0.031982	0.879506	4252	150	0.789605	0.600129	1.0389	0.0915302	0.801521	4228	124	0.802
CSRP1	seq.15529.33	0.989453	0.752853	1.30041	0.939381	0.998072	4567	172	1.10589	0.815053	1.50051	0.51797	0.999831	4542	145	1.08127	0.803702	1.45469	0.605702	0.998408	4252	150	1.25471	0.912072	1.72608	0.163193	0.801968	4228	124	0.802
SLITRK1	seq.15539.15	1.23854	1.03011	1.48914	0.0228734	0.998072	4567	172	1.16473	0.948815	1.42977	0.144917	0.999831	4542	145	1.29563	1.05147	1.59649	0.0150539	0.85496	4252	150	1.2073	0.948721	1.53636	0.125537	0.801521	4228	124	0.802
CKMT1A	seq.15542.19	1.10028	0.918592	1.3179	0.299351	0.998072	4567	172	1.12219	0.937511	1.34325	0.208887	0.999831	4542	145	1.23006	1.03125	1.4672	0.0213261	0.857608	4252	150	1.18911	0.982153	1.43967	0.0758307	0.801521	4228	124	0.802
ANTXR2	seq.15559.5	1.08214	0.923376	1.26819	0.329476	0.998072	4567	172	0.96978	0.821548	1.14476	0.716914	0.999831	4542	145	1.01168	0.846249	1.20944	0.898608	0.998408	4252	150	0.874105	0.726771	1.05131	0.153082	0.801968	4228	124	0.802
CCNA2	seq.15574.37	0.96316	0.798693	1.16149	0.69438	0.998072	4567	172	0.935984	0.747249	1.17239	0.564755	0.999831	4542	145	0.889843	0.71629	1.10545	0.291723	0.998408	4252	150	0.847336	0.651091	1.10273	0.217776	0.801968	4228	124	0.802
ENPP6	seq.15579.26	0.96494	0.795138	1.171	0.71779	0.998072	4567	172	0.828818	0.642177	1.0697	0.149198	0.999831	4542	145	0.915895	0.733916	1.143	0.436944	0.998408	4252	150	0.794226	0.588748	1.07142	0.13146	0.801521	4228	124	0.802
FANK1	seq.15581.16	0.841428	0.682255	1.03774	0.106575	0.998072	4567	172	0.827177	0.644526	1.06159	0.136092	0.999831	4542	145	0.83875	0.673965	1.04383	0.115104	0.998408	4252	150	0.833577	0.645602	1.07628	0.162665	0.801968	4228	124	0.802
CFHR2	seq.15584.9	1.20567	0.983264	1.47839	0.0722132	0.998072	4567	172	1.2158	0.965985	1.53023	0.0958926	0.999831	4542	145	1.17551	0.938947	1.47167	0.158393	0.998408	4252	150	1.20316	0.923055	1.56827	0.171358	0.801968	4228	124	0.802
ITGA2	seq.15603.20	0.911028	0.770703	1.0769	0.274893	0.998072	4567	172	0.863762	0.718585	1.03827	0.118763	0.999831	4542	145	0.886417	0.727198	1.0805	0.232647	0.998408	4252	150	0.84827	0.689078	1.04424	0.120711	0.801521	4228	124	0.802
KRT19	seq.15606.19	1.04607	0.910627	1.20167	0.524338	0.998072	4567	172	1.06328	0.922966	1.22492	0.395451	0.999831	4542	145	1.07657	0.930519	1.24554	0.321259	0.998408	4252	150	1.1085	0.951083	1.29197	0.187445	0.801968	4228	124	0.802
PKLR	seq.15607.56	0.983316	0.801577	1.20626	0.871799	0.998072	4567	172	1.05306	0.860001	1.28946	0.616824	0.999831	4542	145	1.05263	0.853683	1.29794	0.631311	0.998408	4252	150	1.14623	0.930313	1.41225	0.199966	0.801968	4228	124	0.802
LAP3	seq.15610.72	1.05966	0.847863	1.32436	0.61051	0.998072	4567	172	1.14248	0.911773	1.43156	0.247103	0.999831	4542	145	1.11648	0.893926	1.39443	0.331354	0.998408	4252	150	1.21925	0.976796	1.52187	0.0796963	0.801521	4228	124	0.802
SLIT1	seq.15634.139	0.904675	0.758869	1.07849	0.263885	0.998072	4567	172	0.882853	0.713106	1.09301	0.252756	0.999831	4542	145	0.866115	0.701568	1.06925	0.18119	0.998408	4252	150	0.828436	0.637988	1.07573	0.157882	0.801968	4228	124	0.802
SORCS3	seq.15637.38	1.01658	0.862616	1.19803	0.844407	0.998072	4567	172	0.937672	0.781742	1.1247	0.487979	0.999831	4542	145	0.954117	0.782814	1.16291	0.641789	0.998408	4252	150	0.861436	0.69279	1.07113	0.179659	0.801968	4228	124	0.802
TMEFF1	seq.15641.20	0.896194	0.741655	1.08293	0.256402	0.998072	4567	172	0.903388	0.738417	1.10521	0.323348	0.999831	4542	145	0.831212	0.676893	1.02071	0.0776737	0.977293	4252	150	0.870424	0.704906	1.07481	0.19719	0.801968	4228	124	0.802
BTD	seq.15644.1	0.895493	0.758177	1.05768	0.193697	0.998072	4567	172	0.844518	0.707425	1.00818	0.0615018	0.999831	4542	145	0.916834	0.764253	1.09988	0.349818	0.998408	4252	150	0.863102	0.711353	1.04722	0.135624	0.801521	4228	124	0.802
BMP2	seq.15666.21	0.901465	0.75838	1.07155	0.23945	0.998072	4567	172	0.90937	0.754683	1.09576	0.317956	0.999831	4542	145	0.856546	0.703277	1.04322	0.12371	0.998408	4252	150	0.837483	0.666087	1.05298	0.128991	0.801521	4228	124	0.802
BMP8B	seq.15668.19	1.16466	0.990512	1.36944	0.0650908	0.998072	4567	172	1.08333	0.908511	1.2918	0.372698	0.999831	4542	145	1.22296	1.03419	1.44619	0.018623	0.857608	4252	150	1.13604	0.944123	1.36696	0.176706	0.801968	4228	124	0.802
C1QL2	seq.15670.15	1.10438	0.963901	1.26533	0.152627	0.998072	4567	172	1.04915	0.892208	1.2337	0.56165	0.999831	4542	145	1.16024	1.02307	1.3158	0.0205989	0.857608	4252	150	1.10107	0.945217	1.28262	0.216286	0.801968	4228	124	0.802
CD79A	seq.15674.3	1.08003	0.903613	1.29089	0.397484	0.998072	4567	172	1.11157	0.921957	1.34018	0.267658	0.999831	4542	145	1.12645	0.947261	1.33954	0.17796	0.998408	4252	150	1.17334	0.982794	1.40084	0.077054	0.801521	4228	124	0.802
LMAN1	seq.15688.30	0.887145	0.729037	1.07954	0.2318	0.998072	4567	172	0.834196	0.661124	1.05258	0.126492	0.999831	4542	145	0.902742	0.730685	1.11532	0.342928	0.998408	4252	150	0.826638	0.634178	1.07751	0.159143	0.801968	4228	124	0.802
SHC1	seq.16043.30	0.901091	0.647369	1.25425	0.537042	0.998072	4567	172	1.08004	0.773966	1.50715	0.650635	0.999831	4542	145	1.0022	0.714294	1.40615	0.989859	0.998408	4252	150	1.22475	0.886404	1.69225	0.219065	0.801968	4228	124	0.802
OLR1	seq.16049.43	1.13968	0.969567	1.33964	0.112903	0.998072	4567	172	1.1202	0.934718	1.3425	0.21906	0.999831	4542	145	1.15454	0.977221	1.36402	0.0911935	0.990082	4252	150	1.13336	0.941799	1.36389	0.185094	0.801968	4228	124	0.802
WIF1	seq.16070.7	0.831229	0.670245	1.03088	0.0923583	0.998072	4567	172	0.840466	0.657728	1.07397	0.164694	0.999831	4542	145	0.757485	0.582089	0.985731	0.0387385	0.92329	4252	150	0.784039	0.579283	1.06117	0.115135	0.801521	4228	124	0.802
TEC	seq.16079.2	1.03244	0.72862	1.46294	0.857519	0.998072	4567	172	1.07997	0.737378	1.58172	0.692733	0.999831	4542	145	1.20655	0.845927	1.72092	0.300004	0.998408	4252	150	1.28836	0.887235	1.87083	0.183083	0.801968	4228	124	0.802
AKR1B10	seq.16081.38	1.19272	1.00818	1.41104	0.0398816	0.998072	4567	172	1.17582	0.98624	1.40184	0.0709907	0.999831	4542	145	1.16913	0.982994	1.3905	0.0773733	0.975198	4252	150	1.14505	0.950748	1.37906	0.15339	0.801968	4228	124	0.802
ROBO4	seq.16297.14	0.784046	0.64694	0.950209	0.0131093	0.868193	4567	172	0.825369	0.679427	1.00266	0.053204	0.999831	4542	145	0.804307	0.651989	0.992208	0.0420497	0.92329	4252	150	0.858147	0.696117	1.05789	0.151891	0.801968	4228	124	0.802
UNC5D	seq.16307.22	1.20608	1.00276	1.45064	0.0466754	0.998072	4567	172	1.2003	0.976765	1.475	0.0824903	0.999831	4542	145	1.18124	0.948448	1.47116	0.13692	0.998408	4252	150	1.18735	0.926203	1.52214	0.175394	0.801968	4228	124	0.802
BTLA	seq.16308.14	0.929316	0.798602	1.08143	0.343207	0.998072	4567	172	0.871969	0.734912	1.03459	0.116351	0.999831	4542	145	0.929093	0.798533	1.081	0.341139	0.998408	4252	150	0.88385	0.746002	1.04717	0.153519	0.801968	4228	124	0.802
ACVRL1	seq.16318.12	0.982421	0.84852	1.13745	0.812472	0.998072	4567	172	0.916466	0.761867	1.10244	0.354751	0.999831	4542	145	0.960703	0.8179	1.12844	0.625353	0.998408	4252	150	0.871297	0.701466	1.08225	0.212957	0.801968	4228	124	0.802
A1BG	seq.16561.9	1.03589	0.862801	1.24369	0.705448	0.998072	4567	172	1.09223	0.887697	1.3439	0.404303	0.999831	4542	145	1.11173	0.913339	1.35321	0.290913	0.998408	4252	150	1.18804	0.952837	1.48129	0.125823	0.801521	4228	124	0.802
NUDT2	seq.16583.8	0.999244	0.741309	1.34693	0.996038	0.999073	4567	172	1.10941	0.7988	1.54079	0.53557	0.999831	4542	145	1.08876	0.804304	1.47382	0.582023	0.998408	4252	150	1.2563	0.915121	1.72469	0.15814	0.801968	4228	124	0.802
HSPA5	seq.16588.10	1.20534	1.00233	1.44947	0.0471785	0.998072	4567	172	1.16025	0.95085	1.41577	0.143276	0.999831	4542	145	1.2181	0.999643	1.48429	0.0504107	0.926196	4252	150	1.14593	0.926793	1.41687	0.208422	0.801968	4228	124	0.802
GLRX3	seq.16596.25	0.971008	0.727029	1.29686	0.842046	0.998072	4567	172	1.14773	0.859213	1.53312	0.350942	0.999831	4542	145	1.08244	0.795159	1.47351	0.614685	0.998408	4252	150	1.30264	0.970979	1.74757	0.0778068	0.801521	4228	124	0.802
GSN	seq.16607.78	1.01439	0.869109	1.18395	0.856274	0.998072	4567	172	0.972718	0.829665	1.14044	0.73324	0.999831	4542	145	0.936503	0.786696	1.11484	0.460728	0.998408	4252	150	0.882368	0.733533	1.0614	0.184259	0.801968	4228	124	0.802
RSPO1	seq.16614.27	0.939426	0.793957	1.11155	0.466636	0.998072	4567	172	0.949295	0.786498	1.14579	0.587727	0.999831	4542	145	0.872272	0.710902	1.07027	0.190429	0.998408	4252	150	0.863901	0.684174	1.09084	0.21894	0.801968	4228	124	0.802
NAXE	seq.16621.77	1.15167	0.900293	1.47323	0.261027	0.998072	4567	172	1.25848	0.979877	1.61629	0.071738	0.999831	4542	145	1.15141	0.868788	1.52598	0.326513	0.998408	4252	150	1.2699	0.956355	1.68625	0.098627	0.801521	4228	124	0.802
RAC3	seq.16769.20	1.17367	0.900553	1.52961	0.236049	0.998072	4567	172	1.13203	0.849022	1.50938	0.398162	0.999831	4542	145	1.26959	0.980197	1.64441	0.0705351	0.951571	4252	150	1.22833	0.928618	1.62476	0.149568	0.801968	4228	124	0.802
REG1B	seq.16770.3	1.11329	0.943548	1.31357	0.203538	0.998072	4567	172	1.13512	0.950623	1.35542	0.161378	0.999831	4542	145	1.12337	0.937089	1.34667	0.208547	0.998408	4252	150	1.15097	0.944451	1.40264	0.163452	0.801968	4228	124	0.802
ENGASE	seq.16781.2	0.909343	0.773433	1.06913	0.249889	0.998072	4567	172	0.892138	0.750684	1.06025	0.195044	0.999831	4542	145	0.894454	0.749918	1.06685	0.214824	0.998408	4252	150	0.879993	0.73082	1.05961	0.177341	0.801968	4228	124	0.802
GDI1	seq.16810.3	0.974077	0.758744	1.25052	0.836743	0.998072	4567	172	1.07112	0.841265	1.36377	0.577208	0.999831	4542	145	1.08253	0.832132	1.40826	0.554642	0.998408	4252	150	1.19538	0.925297	1.5443	0.171999	0.801968	4228	124	0.802
FHL1	seq.16814.13	0.987124	0.847375	1.14992	0.867848	0.998072	4567	172	0.865659	0.721401	1.03876	0.120879	0.999831	4542	145	1.00794	0.868818	1.16934	0.916886	0.998408	4252	150	0.884508	0.737598	1.06068	0.185397	0.801968	4228	124	0.802
PDZK1	seq.16852.10	0.948189	0.79149	1.13591	0.563765	0.998072	4567	172	0.956982	0.779754	1.17449	0.673902	0.999831	4542	145	0.853223	0.714454	1.01895	0.0796438	0.980121	4252	150	0.836007	0.683096	1.02315	0.0822158	0.801521	4228	124	0.802
MAPRE2	seq.16856.79	1.0733	0.840178	1.3711	0.571284	0.998072	4567	172	1.10604	0.856243	1.4287	0.440313	0.999831	4542	145	1.14561	0.906863	1.44722	0.254248	0.998408	4252	150	1.20549	0.956591	1.51915	0.113221	0.801521	4228	124	0.802
MSRB2	seq.16877.19	0.961848	0.818949	1.12968	0.635468	0.998072	4567	172	0.951654	0.788611	1.14841	0.605286	0.999831	4542	145	0.889791	0.744061	1.06406	0.200699	0.998408	4252	150	0.873237	0.710061	1.07391	0.199024	0.801968	4228	124	0.802
PTRH2	seq.16887.29	0.974502	0.793346	1.19702	0.80557	0.998072	4567	172	0.840514	0.678485	1.04124	0.111801	0.999831	4542	145	0.987428	0.792651	1.23007	0.910141	0.998408	4252	150	0.839873	0.664071	1.06222	0.145311	0.801968	4228	124	0.802
DBI	seq.16919.1	1.04563	0.781851	1.3984	0.76355	0.998072	4567	172	1.19496	0.907356	1.57374	0.204822	0.999831	4542	145	1.06735	0.791043	1.44017	0.66979	0.998408	4252	150	1.2537	0.958385	1.64001	0.0989771	0.801521	4228	124	0.802
PFN2	seq.16923.20	0.87852	0.720302	1.07149	0.201104	0.998072	4567	172	0.824631	0.644227	1.05555	0.125826	0.999831	4542	145	0.84955	0.670332	1.07668	0.177403	0.998408	4252	150	0.792445	0.586612	1.0705	0.129511	0.801521	4228	124	0.802
BLVRB	seq.17148.7	0.993838	0.81204	1.21634	0.952178	0.998072	4567	172	1.11566	0.90987	1.368	0.292768	0.999831	4542	145	1.03806	0.837075	1.28731	0.733679	0.998408	4252	150	1.17806	0.943037	1.47165	0.148909	0.801968	4228	124	0.802
IRF3	seq.17151.84	0.901776	0.657148	1.23747	0.521943	0.998072	4567	172	1.11379	0.80112	1.54849	0.521504	0.999831	4542	145	0.990326	0.709499	1.38231	0.954437	0.998408	4252	150	1.25134	0.89883	1.7421	0.184121	0.801968	4228	124	0.802
FGF8	seq.17166.4	1.01662	0.867758	1.19102	0.838314	0.998072	4567	172	1.02761	0.876011	1.20545	0.738018	0.999831	4542	145	1.10519	0.937585	1.30276	0.233276	0.998408	4252	150	1.11145	0.939455	1.31494	0.21799	0.801968	4228	124	0.802
PSIP1	seq.17176.13	0.985706	0.80136	1.21246	0.891593	0.998072	4567	172	1.16749	0.951253	1.43288	0.138397	0.999831	4542	145	0.983783	0.78699	1.22979	0.88583	0.998408	4252	150	1.16146	0.925695	1.45727	0.19601	0.801968	4228	124	0.802
PDCD4	seq.17202.37	0.989371	0.83182	1.17676	0.90389	0.998072	4567	172	0.974547	0.795277	1.19423	0.803676	0.999831	4542	145	0.852207	0.694663	1.04548	0.125146	0.998408	4252	150	0.812018	0.622862	1.05862	0.123806	0.801521	4228	124	0.802
TCL1A	seq.17210.2	0.841882	0.696424	1.01772	0.0753244	0.998072	4567	172	0.838774	0.69209	1.01655	0.0730275	0.999831	4542	145	0.866533	0.694547	1.08111	0.2044	0.998408	4252	150	0.863766	0.691355	1.07917	0.197315	0.801968	4228	124	0.802
LCP1	seq.17231.1	0.986376	0.804848	1.20885	0.894831	0.998072	4567	172	0.938	0.754926	1.16547	0.563421	0.999831	4542	145	0.922257	0.74777	1.13746	0.44945	0.998408	4252	150	0.862526	0.691922	1.0752	0.188438	0.801968	4228	124	0.802
AASDHPPT	seq.17320.19	0.971175	0.722967	1.3046	0.845991	0.998072	4567	172	1.13004	0.842846	1.51509	0.41383	0.999831	4542	145	1.04885	0.77316	1.42285	0.759188	0.998408	4252	150	1.23748	0.92336	1.65847	0.153787	0.801968	4228	124	0.802
GUK1	seq.17325.10	0.933434	0.699147	1.24623	0.640384	0.998072	4567	172	1.11211	0.830625	1.48899	0.475445	0.999831	4542	145	1.01994	0.746386	1.39375	0.901383	0.998408	4252	150	1.25514	0.915716	1.72037	0.157759	0.801968	4228	124	0.802
ADPRS	seq.17332.3	1.04671	0.835084	1.31197	0.691989	0.998072	4567	172	1.19254	0.958245	1.48413	0.114606	0.999831	4542	145	1.0793	0.848567	1.37277	0.534021	0.998408	4252	150	1.24015	0.981264	1.56733	0.0715961	0.801521	4228	124	0.802
ACAT2	seq.17341.89	0.968648	0.754505	1.24357	0.802671	0.998072	4567	172	1.07689	0.83241	1.39316	0.572881	0.999831	4542	145	1.03964	0.787267	1.37291	0.784084	0.998408	4252	150	1.19353	0.900178	1.58248	0.218965	0.801968	4228	124	0.802
CHMP2B	seq.17350.13	0.937413	0.684709	1.28338	0.686755	0.998072	4567	172	1.12409	0.812805	1.55458	0.479514	0.999831	4542	145	1.01897	0.732044	1.41837	0.911304	0.998408	4252	150	1.23669	0.891055	1.71639	0.20399	0.801968	4228	124	0.802
IL1F10	seq.17356.34	1.12139	0.994993	1.26385	0.0604187	0.998072	4567	172	1.11151	0.981255	1.25905	0.0964249	0.999831	4542	145	1.07402	0.940052	1.22707	0.293482	0.998408	4252	150	1.09273	0.94834	1.2591	0.220039	0.801968	4228	124	0.802
VHL	seq.17362.5	1.09945	0.938062	1.28861	0.241765	0.998072	4567	172	1.13022	0.95049	1.34393	0.165945	0.999831	4542	145	1.10417	0.929066	1.31228	0.260657	0.998408	4252	150	1.16435	0.963652	1.40684	0.114931	0.801521	4228	124	0.802
DCUN1D1	seq.17366.6	1.07467	0.902388	1.27985	0.419181	0.998072	4567	172	1.0661	0.877518	1.2952	0.519288	0.999831	4542	145	1.18218	0.96925	1.44188	0.098587	0.998408	4252	150	1.18849	0.952014	1.4837	0.12712	0.801521	4228	124	0.802
ABHD10	seq.17370.186	1.042	0.77122	1.40785	0.788729	0.998072	4567	172	1.05277	0.77162	1.43636	0.745619	0.999831	4542	145	1.15207	0.851012	1.55963	0.359646	0.998408	4252	150	1.20588	0.895406	1.62402	0.217721	0.801968	4228	124	0.802
STARD5	seq.17383.4	0.995723	0.832927	1.19034	0.962471	0.998072	4567	172	1.05812	0.885737	1.26404	0.533526	0.999831	4542	145	1.03471	0.857165	1.24903	0.722399	0.998408	4252	150	1.13437	0.948995	1.35595	0.166079	0.801968	4228	124	0.802
PFKM	seq.17384.110	1.00976	0.722382	1.41146	0.95467	0.998072	4567	172	1.12318	0.807855	1.56157	0.489628	0.999831	4542	145	1.10777	0.785217	1.56283	0.559952	0.998408	4252	150	1.25215	0.90619	1.7302	0.172902	0.801968	4228	124	0.802
NFKBIB	seq.17387.27	0.909228	0.762251	1.08455	0.290144	0.998072	4567	172	0.853471	0.688698	1.05767	0.147693	0.999831	4542	145	0.877212	0.725915	1.06004	0.174995	0.998408	4252	150	0.808086	0.636551	1.02585	0.080052	0.801521	4228	124	0.802
HMOX1	seq.17398.55	0.90506	0.771417	1.06186	0.221053	0.998072	4567	172	0.908708	0.764978	1.07944	0.275815	0.999831	4542	145	0.864891	0.718488	1.04113	0.125019	0.998408	4252	150	0.876095	0.714847	1.07371	0.202433	0.801968	4228	124	0.802
CETN3	seq.17410.5	1.09029	0.952253	1.24834	0.210706	0.998072	4567	172	1.12487	0.976611	1.29565	0.102721	0.999831	4542	145	1.06897	0.928117	1.23119	0.35488	0.998408	4252	150	1.11963	0.969469	1.29306	0.124052	0.801521	4228	124	0.802
UFD1	seq.17411.55	0.966672	0.675728	1.38289	0.852806	0.998072	4567	172	1.13547	0.798876	1.61389	0.478799	0.999831	4542	145	1.07183	0.749883	1.53201	0.703472	0.998408	4252	150	1.26868	0.926652	1.73694	0.137615	0.801521	4228	124	0.802
ALPI	seq.17441.4	1.13792	0.970178	1.33466	0.112309	0.998072	4567	172	1.08964	0.914864	1.29782	0.335817	0.999831	4542	145	1.17864	0.997428	1.39278	0.0536358	0.926196	4252	150	1.12467	0.935557	1.35202	0.210995	0.801968	4228	124	0.802
EGFL6	seq.17454.15	1.02797	0.870706	1.21363	0.744709	0.998072	4567	172	1.07913	0.907803	1.2828	0.387914	0.999831	4542	145	1.0519	0.887366	1.24695	0.559845	0.998408	4252	150	1.12478	0.944847	1.33899	0.186123	0.801968	4228	124	0.802
TBCB	seq.17686.27	0.924707	0.688853	1.24131	0.602325	0.998072	4567	172	1.14073	0.831075	1.56576	0.415155	0.999831	4542	145	1.00898	0.736226	1.38279	0.955652	0.998408	4252	150	1.29328	0.933603	1.79153	0.121914	0.801521	4228	124	0.802
SEPTIN6	seq.17693.2	0.884855	0.763377	1.02567	0.10445	0.998072	4567	172	0.855225	0.730413	1.00137	0.0520106	0.999831	4542	145	0.91477	0.790076	1.05914	0.23347	0.998408	4252	150	0.866556	0.731985	1.02587	0.0962298	0.801521	4228	124	0.802
PSME2	seq.17694.32	1.01409	0.811488	1.26727	0.902088	0.998072	4567	172	1.12673	0.907594	1.39877	0.279553	0.999831	4542	145	1.06933	0.845669	1.35214	0.57556	0.998408	4252	150	1.19508	0.947787	1.50689	0.131903	0.801521	4228	124	0.802
OVCA2	seq.17697.2	0.895757	0.639992	1.25373	0.521026	0.998072	4567	172	1.09481	0.767779	1.56113	0.616839	0.999831	4542	145	0.995726	0.6976	1.42126	0.981179	0.998408	4252	150	1.24944	0.878312	1.77739	0.215558	0.801968	4228	124	0.802
FKBP4	seq.17722.5	0.959302	0.756766	1.21604	0.731303	0.998072	4567	172	1.11432	0.888939	1.39686	0.347785	0.999831	4542	145	1.02948	0.7915	1.33902	0.828486	0.998408	4252	150	1.22193	0.94716	1.57641	0.123008	0.801521	4228	124	0.802
RRAS	seq.17742.2	1.10464	0.858462	1.4214	0.439157	0.998072	4567	172	1.15579	0.878319	1.52092	0.301284	0.999831	4542	145	1.14733	0.882972	1.49083	0.303696	0.998408	4252	150	1.19828	0.902487	1.59103	0.211069	0.801968	4228	124	0.802
DCTD	seq.17756.69	0.992283	0.728829	1.35097	0.960755	0.998072	4567	172	1.12899	0.829228	1.53711	0.440945	0.999831	4542	145	1.08777	0.805192	1.46953	0.583562	0.998408	4252	150	1.25046	0.944878	1.65486	0.117959	0.801521	4228	124	0.802
RHOC	seq.17764.108	0.977172	0.742897	1.28533	0.868846	0.998072	4567	172	1.10109	0.814698	1.48816	0.530937	0.999831	4542	145	1.11054	0.826938	1.4914	0.485863	0.998408	4252	150	1.30822	0.962207	1.77865	0.0864938	0.801521	4228	124	0.802
PCNP	seq.17769.28	0.918446	0.704381	1.19757	0.529776	0.998072	4567	172	1.08892	0.848821	1.39694	0.502666	0.999831	4542	145	1.02034	0.777145	1.33963	0.884759	0.998408	4252	150	1.22213	0.958363	1.5585	0.105845	0.801521	4228	124	0.802
UBD	seq.17772.7	0.919076	0.793891	1.064	0.258648	0.998072	4567	172	0.881582	0.75285	1.03233	0.117591	0.999831	4542	145	0.902657	0.76806	1.06084	0.213833	0.998408	4252	150	0.853901	0.716369	1.01784	0.0779541	0.801521	4228	124	0.802
PECR	seq.17776.15	0.868597	0.741799	1.01707	0.080157	0.998072	4567	172	0.901322	0.760631	1.06804	0.230204	0.999831	4542	145	0.810018	0.677581	0.96834	0.0207109	0.857608	4252	150	0.855355	0.702387	1.04164	0.120135	0.801521	4228	124	0.802
MAP1LC3A	seq.17781.191	1.12986	0.902431	1.4146	0.287003	0.998072	4567	172	1.19569	0.942002	1.5177	0.141852	0.999831	4542	145	1.15111	0.902402	1.46837	0.257165	0.998408	4252	150	1.25217	0.970408	1.61574	0.0838024	0.801521	4228	124	0.802
ACAA1	seq.17782.23	0.868506	0.728904	1.03484	0.114818	0.998072	4567	172	0.893027	0.745316	1.07001	0.220033	0.999831	4542	145	0.85849	0.70626	1.04353	0.125493	0.998408	4252	150	0.877911	0.718354	1.07291	0.203252	0.801968	4228	124	0.802
DIRAS1	seq.17793.4	0.957633	0.811165	1.13055	0.60924	0.998072	4567	172	0.911211	0.776508	1.06928	0.254601	0.999831	4542	145	0.925938	0.766363	1.11874	0.425251	0.998408	4252	150	0.880771	0.737937	1.05125	0.159621	0.801968	4228	124	0.802
SDCBP	seq.17806.6	0.760592	0.614631	0.941216	0.0118265	0.848172	4567	172	0.810155	0.652304	1.0062	0.0569022	0.999831	4542	145	0.773958	0.614375	0.974994	0.0296338	0.879255	4252	150	0.82718	0.649503	1.05346	0.124083	0.801521	4228	124	0.802
BPHL	seq.17813.21	0.879724	0.750021	1.03186	0.115337	0.998072	4567	172	0.837042	0.691619	1.01304	0.0677116	0.999831	4542	145	0.850936	0.71541	1.01214	0.0681951	0.949907	4252	150	0.838875	0.684187	1.02854	0.0911364	0.801521	4228	124	0.802
BPNT1	seq.17814.8	0.870583	0.62848	1.20595	0.404497	0.998072	4567	172	1.00544	0.703014	1.43797	0.976277	0.999831	4542	145	1.03577	0.742253	1.44537	0.836205	0.998408	4252	150	1.2374	0.887561	1.72513	0.208956	0.801968	4228	124	0.802
MLF1	seq.17820.170	0.885848	0.67118	1.16917	0.391945	0.998072	4567	172	0.86329	0.652996	1.14131	0.302046	0.999831	4542	145	0.864415	0.622952	1.19947	0.383333	0.998408	4252	150	0.806501	0.585156	1.11157	0.188919	0.801968	4228	124	0.802
EEF1D	seq.17826.341	0.94296	0.714589	1.24431	0.678068	0.998072	4567	172	1.10364	0.819476	1.48634	0.516185	0.999831	4542	145	1.02511	0.762416	1.37833	0.869566	0.998408	4252	150	1.22338	0.895309	1.67167	0.205603	0.801968	4228	124	0.802
ANXA13	seq.17835.28	1.02624	0.890609	1.18253	0.720213	0.998072	4567	172	0.984187	0.838786	1.15479	0.845063	0.999831	4542	145	0.891017	0.74639	1.06367	0.201615	0.998408	4252	150	0.860016	0.697506	1.06039	0.158164	0.801968	4228	124	0.802
CLIC2	seq.17837.5	1.03192	0.886142	1.20167	0.685964	0.998072	4567	172	1.1126	0.961214	1.28783	0.152754	0.999831	4542	145	1.04182	0.870197	1.24729	0.655516	0.998408	4252	150	1.15241	0.968251	1.37161	0.110306	0.801521	4228	124	0.802
PPCS	seq.17843.30	0.870185	0.611134	1.23905	0.440585	0.998072	4567	172	1.03798	0.713438	1.51014	0.845515	0.999831	4542	145	1.03459	0.717387	1.49204	0.855573	0.998408	4252	150	1.27662	0.89328	1.82446	0.180076	0.801968	4228	124	0.802
PYCR1	seq.18170.46	1.08234	0.921707	1.27096	0.334384	0.998072	4567	172	1.09528	0.923387	1.29918	0.296071	0.999831	4542	145	1.14309	0.981028	1.33192	0.0864468	0.983043	4252	150	1.14974	0.977151	1.35281	0.0926733	0.801521	4228	124	0.802
SARS1	seq.18178.13	0.898531	0.632341	1.27678	0.550578	0.998072	4567	172	1.02284	0.745684	1.40301	0.888611	0.999831	4542	145	1.03503	0.772153	1.3874	0.817856	0.998408	4252	150	1.1749	0.916243	1.50658	0.203904	0.801968	4228	124	0.802
SMS	seq.18179.56	1.0908	0.906419	1.31269	0.357586	0.998072	4567	172	1.05224	0.838168	1.32099	0.660807	0.999831	4542	145	1.17029	0.999882	1.36974	0.0501673	0.926196	4252	150	1.13167	0.936436	1.36761	0.200452	0.801968	4228	124	0.802
TSSC4	seq.18181.2	1.01154	0.818023	1.25084	0.915638	0.998072	4567	172	1.11352	0.910724	1.36147	0.294505	0.999831	4542	145	1.03724	0.837263	1.28498	0.737928	0.998408	4252	150	1.1412	0.929605	1.40097	0.206819	0.801968	4228	124	0.802
ALDOB	seq.18185.118	0.917115	0.757822	1.10989	0.374072	0.998072	4567	172	0.880537	0.716045	1.08282	0.227873	0.999831	4542	145	0.900762	0.733184	1.10664	0.319657	0.998408	4252	150	0.863837	0.691977	1.07838	0.195918	0.801968	4228	124	0.802
GATM	seq.18188.12	1.0372	0.837063	1.28518	0.738441	0.998072	4567	172	1.08504	0.864308	1.36214	0.481848	0.999831	4542	145	1.10075	0.870788	1.39143	0.422077	0.998408	4252	150	1.17077	0.913019	1.50129	0.213967	0.801968	4228	124	0.802
VPS25	seq.18189.12	0.979761	0.697079	1.37708	0.906282	0.998072	4567	172	1.10792	0.779526	1.57466	0.567742	0.999831	4542	145	1.0986	0.781868	1.54364	0.587865	0.998408	4252	150	1.26506	0.903022	1.77225	0.171643	0.801968	4228	124	0.802
ADH6	seq.18206.18	1.05047	0.745872	1.47945	0.778091	0.998072	4567	172	1.22148	0.866509	1.72186	0.253427	0.999831	4542	145	1.13844	0.790793	1.63891	0.485538	0.998408	4252	150	1.35967	0.967133	1.91152	0.0771073	0.801521	4228	124	0.802
GCLM	seq.18214.2	1.00449	0.78737	1.28148	0.971241	0.998072	4567	172	1.1489	0.909353	1.45154	0.244631	0.999831	4542	145	1.08314	0.832954	1.40846	0.55119	0.998408	4252	150	1.25859	0.979104	1.61785	0.0726264	0.801521	4228	124	0.802
CNRIP1	seq.18218.48	1.01005	0.833956	1.22332	0.918531	0.998072	4567	172	1.11259	0.923908	1.33981	0.260472	0.999831	4542	145	1.05698	0.863227	1.29421	0.591705	0.998408	4252	150	1.17167	0.956792	1.4348	0.125351	0.801521	4228	124	0.802
SH3GLB2	seq.18222.34	0.967542	0.757412	1.23597	0.791681	0.998072	4567	172	1.10973	0.872302	1.41179	0.396604	0.999831	4542	145	1.0398	0.800541	1.35057	0.769877	0.998408	4252	150	1.21576	0.931953	1.58599	0.14975	0.801968	4228	124	0.802
COX5A	seq.18226.148	1.0097	0.729953	1.39667	0.953472	0.998072	4567	172	1.15215	0.819769	1.61929	0.414744	0.999831	4542	145	1.14227	0.813625	1.60365	0.442228	0.998408	4252	150	1.35131	0.964605	1.89303	0.0800358	0.801521	4228	124	0.802
ANXA7	seq.18244.1	0.976771	0.732722	1.30211	0.872694	0.998072	4567	172	1.16256	0.866686	1.55943	0.314817	0.999831	4542	145	1.03188	0.75617	1.40813	0.843135	0.998408	4252	150	1.25199	0.910824	1.72095	0.16619	0.801968	4228	124	0.802
NATD1	seq.18261.34	1.1234	0.979112	1.28896	0.0971098	0.998072	4567	172	1.11404	0.96193	1.2902	0.149361	0.999831	4542	145	1.09138	0.939139	1.26831	0.253945	0.998408	4252	150	1.12297	0.958081	1.31623	0.1523	0.801968	4228	124	0.802
CRIP1	seq.18275.5	0.850757	0.719305	1.00623	0.0590976	0.998072	4567	172	0.831996	0.684526	1.01124	0.0646395	0.999831	4542	145	0.858354	0.714987	1.03047	0.101397	0.998408	4252	150	0.837512	0.677363	1.03552	0.101501	0.801521	4228	124	0.802
PURB	seq.18300.39	0.953876	0.709226	1.28292	0.754807	0.998072	4567	172	1.09054	0.799285	1.48794	0.584541	0.999831	4542	145	1.06513	0.777273	1.45958	0.694684	0.998408	4252	150	1.24741	0.908259	1.71322	0.172065	0.801968	4228	124	0.802
SH3GL3	seq.18318.98	0.944514	0.682575	1.30697	0.730484	0.998072	4567	172	1.09799	0.774249	1.5571	0.599948	0.999831	4542	145	1.04945	0.744433	1.47944	0.782942	0.998408	4252	150	1.25144	0.88265	1.77432	0.207952	0.801968	4228	124	0.802
PDHX	seq.18319.7	1.08596	0.835815	1.41097	0.537002	0.998072	4567	172	1.18858	0.910292	1.55194	0.204304	0.999831	4542	145	1.12358	0.849543	1.48601	0.414001	0.998408	4252	150	1.25379	0.9508	1.65332	0.109041	0.801521	4228	124	0.802
MAGEA8	seq.18326.50	0.847405	0.69352	1.03544	0.105359	0.998072	4567	172	0.827833	0.659867	1.03856	0.102463	0.999831	4542	145	0.884615	0.727742	1.0753	0.218316	0.998408	4252	150	0.855548	0.677653	1.08014	0.189592	0.801968	4228	124	0.802
CDA	seq.18336.31	1.08614	0.920754	1.28123	0.326886	0.998072	4567	172	1.12128	0.94073	1.33649	0.201276	0.999831	4542	145	1.11465	0.932119	1.33293	0.23421	0.998408	4252	150	1.17116	0.965616	1.42047	0.108571	0.801521	4228	124	0.802
PSMB3	seq.18339.207	1.10298	0.927436	1.31175	0.267762	0.998072	4567	172	1.10187	0.922082	1.31671	0.285791	0.999831	4542	145	1.14502	0.952306	1.37674	0.149791	0.998408	4252	150	1.14388	0.936802	1.39673	0.187074	0.801968	4228	124	0.802
ST13	seq.18387.7	0.979125	0.758196	1.26443	0.871544	0.998072	4567	172	1.14588	0.898117	1.462	0.273288	0.999831	4542	145	1.05662	0.792153	1.40937	0.707889	0.998408	4252	150	1.26638	0.959952	1.67062	0.0947552	0.801521	4228	124	0.802
IFNA1	seq.18389.11	0.880314	0.724286	1.06995	0.200301	0.998072	4567	172	0.797509	0.629695	1.01005	0.0605071	0.999831	4542	145	0.900355	0.74724	1.08484	0.26972	0.998408	4252	150	0.814449	0.645055	1.02833	0.0844919	0.801521	4228	124	0.802
TLE5	seq.18396.10	0.934011	0.786517	1.10916	0.43627	0.998072	4567	172	0.879359	0.73157	1.05701	0.170858	0.999831	4542	145	0.908554	0.74704	1.10499	0.336899	0.998408	4252	150	0.846162	0.687523	1.0414	0.114798	0.801521	4228	124	0.802
ARL2BP	seq.18407.36	1.064	0.911793	1.24161	0.430934	0.998072	4567	172	1.07674	0.915123	1.26691	0.372877	0.999831	4542	145	1.09103	0.943112	1.26214	0.241185	0.998408	4252	150	1.13357	0.978075	1.31378	0.0958143	0.801521	4228	124	0.802
ARF4	seq.18408.26	0.921301	0.674412	1.25857	0.606536	0.998072	4567	172	1.08381	0.777697	1.51042	0.634576	0.999831	4542	145	1.00168	0.728197	1.37789	0.991743	0.998517	4252	150	1.23614	0.890868	1.71522	0.204614	0.801968	4228	124	0.802
ARL4D	seq.18413.24	0.858942	0.699778	1.05431	0.145886	0.998072	4567	172	0.791442	0.634289	0.987531	0.0383494	0.999831	4542	145	0.841809	0.696024	1.01813	0.0759273	0.969964	4252	150	0.83141	0.671654	1.02916	0.0898971	0.801521	4228	124	0.802
ARL9	seq.18416.3	1.03755	0.909078	1.18418	0.584676	0.998072	4567	172	1.04803	0.913808	1.20197	0.502256	0.999831	4542	145	1.06326	0.917409	1.23229	0.41516	0.998408	4252	150	1.1	0.948848	1.27524	0.206306	0.801968	4228	124	0.802
RALB	seq.18432.32	1.14133	0.899262	1.44855	0.277066	0.998072	4567	172	1.09231	0.84397	1.41372	0.502258	0.999831	4542	145	1.21715	0.963796	1.53711	0.0988768	0.998408	4252	150	1.24472	0.95535	1.62173	0.104883	0.801521	4228	124	0.802
H2BU1	seq.18823.52	1.1987	0.965936	1.48756	0.0998949	0.998072	4567	172	1.27152	1.01294	1.5961	0.0383725	0.999831	4542	145	1.11869	0.874075	1.43175	0.372986	0.998408	4252	150	1.2276	0.936014	1.61001	0.13832	0.801521	4228	124	0.802
LRIG1	seq.18831.6	1.0717	0.905314	1.26867	0.421139	0.998072	4567	172	1.11915	0.941331	1.33057	0.202256	0.999831	4542	145	1.08616	0.894098	1.31947	0.405145	0.998408	4252	150	1.16698	0.950373	1.43297	0.140453	0.801968	4228	124	0.802
PEA15	seq.18833.76	1.12091	0.985378	1.27509	0.082568	0.998072	4567	172	1.09759	0.954156	1.26259	0.192497	0.999831	4542	145	1.12681	0.980226	1.29531	0.0931313	0.99316	4252	150	1.10116	0.94427	1.28412	0.219152	0.801968	4228	124	0.802
SH2D1B	seq.18840.205	1.0402	0.877884	1.23252	0.648877	0.998072	4567	172	1.08702	0.907333	1.30228	0.36541	0.999831	4542	145	1.09817	0.936458	1.28781	0.249228	0.998408	4252	150	1.14766	0.971015	1.35644	0.106295	0.801521	4228	124	0.802
EIF4EBP3	seq.18859.7	0.917599	0.775633	1.08555	0.315964	0.998072	4567	172	0.852224	0.677665	1.07175	0.171481	0.999831	4542	145	0.923531	0.777716	1.09669	0.364229	0.998408	4252	150	0.856215	0.671959	1.091	0.209267	0.801968	4228	124	0.802
PRSS3	seq.18864.7	1.1395	0.976955	1.32908	0.096296	0.998072	4567	172	1.13047	0.958407	1.33343	0.145469	0.999831	4542	145	1.14012	0.964191	1.34816	0.125139	0.998408	4252	150	1.1679	0.973656	1.40091	0.0944553	0.801521	4228	124	0.802
CEBPA	seq.18874.66	0.859157	0.70662	1.04462	0.127948	0.998072	4567	172	0.853167	0.698354	1.0423	0.120074	0.999831	4542	145	0.808211	0.645615	1.01176	0.0631668	0.940117	4252	150	0.857939	0.679042	1.08397	0.199067	0.801968	4228	124	0.802
CNN2	seq.18877.15	1.07017	0.81407	1.40682	0.627015	0.998072	4567	172	1.09694	0.825083	1.45836	0.524288	0.999831	4542	145	1.20184	0.926417	1.55915	0.166218	0.998408	4252	150	1.24942	0.960557	1.62516	0.0969114	0.801521	4228	124	0.802
CLSTN2	seq.18882.7	0.983109	0.830289	1.16406	0.84333	0.998072	4567	172	0.888035	0.741425	1.06364	0.197101	0.999831	4542	145	0.974819	0.806337	1.17851	0.792217	0.998408	4252	150	0.880087	0.718259	1.07838	0.217899	0.801968	4228	124	0.802
DNAJB4	seq.18884.22	0.991871	0.736034	1.33663	0.957231	0.998072	4567	172	1.10374	0.813346	1.4978	0.52631	0.999831	4542	145	1.09466	0.798536	1.5006	0.574101	0.998408	4252	150	1.26321	0.924693	1.72564	0.142084	0.801968	4228	124	0.802
ENTPD2	seq.18887.7	1.06359	0.912889	1.23916	0.429049	0.998072	4567	172	1.06539	0.908265	1.24971	0.436512	0.999831	4542	145	1.1223	0.958086	1.31466	0.152859	0.998408	4252	150	1.13713	0.971644	1.33081	0.109261	0.801521	4228	124	0.802
GPX2	seq.18894.1	1.1392	0.993933	1.3057	0.0611288	0.998072	4567	172	1.13088	0.97059	1.31764	0.114747	0.999831	4542	145	1.15636	1.00153	1.33513	0.0476119	0.92329	4252	150	1.15205	0.982732	1.35054	0.0809455	0.801521	4228	124	0.802
CCNH	seq.18913.3	0.81071	0.651304	1.00913	0.0602944	0.998072	4567	172	0.824726	0.650448	1.0457	0.111598	0.999831	4542	145	0.811914	0.638604	1.03226	0.0889734	0.986413	4252	150	0.810685	0.615093	1.06847	0.136262	0.801521	4228	124	0.802
ITPA	seq.18916.25	1.07885	0.904846	1.28631	0.397695	0.998072	4567	172	1.13533	0.929493	1.38675	0.213647	0.999831	4542	145	1.11891	0.929597	1.34677	0.234819	0.998408	4252	150	1.16859	0.94143	1.45057	0.157736	0.801968	4228	124	0.802
AMY2A	seq.18917.53	1.22329	1.0509	1.42395	0.00930579	0.839944	4567	172	1.18737	1.00481	1.40309	0.0437612	0.999831	4542	145	1.23265	1.03003	1.47513	0.0224314	0.857608	4252	150	1.19081	0.977441	1.45076	0.0830053	0.801521	4228	124	0.802
PDE4A	seq.18918.86	0.902827	0.76778	1.06163	0.216243	0.998072	4567	172	0.864255	0.734085	1.01751	0.0798384	0.999831	4542	145	0.889331	0.733458	1.07833	0.232893	0.998408	4252	150	0.843238	0.685012	1.03801	0.107806	0.801521	4228	124	0.802
SLIT3	seq.18931.40	0.927938	0.77486	1.11126	0.416157	0.998072	4567	172	0.889576	0.715278	1.10635	0.292953	0.999831	4542	145	0.889314	0.724977	1.0909	0.26045	0.998408	4252	150	0.839244	0.649432	1.08453	0.18035	0.801968	4228	124	0.802
RAC2	seq.18950.13	0.970918	0.715197	1.31807	0.849908	0.998072	4567	172	1.09639	0.788679	1.52415	0.584028	0.999831	4542	145	1.08189	0.786772	1.4877	0.628157	0.998408	4252	150	1.24131	0.889032	1.73319	0.204321	0.801968	4228	124	0.802
OSTF1	seq.19118.47	0.934261	0.79024	1.10453	0.42598	0.998072	4567	172	0.916174	0.755981	1.11031	0.371939	0.999831	4542	145	0.913614	0.771204	1.08232	0.296029	0.998408	4252	150	0.874881	0.716138	1.06881	0.190693	0.801968	4228	124	0.802
DAO	seq.19120.33	1.04672	0.910101	1.20385	0.522222	0.998072	4567	172	0.968801	0.813512	1.15373	0.722133	0.999831	4542	145	0.980819	0.828224	1.16153	0.822388	0.998408	4252	150	0.876089	0.714179	1.0747	0.204467	0.801968	4228	124	0.802
RPRD1B	seq.19126.4	0.897988	0.749529	1.07585	0.243206	0.998072	4567	172	0.895692	0.73647	1.08934	0.269973	0.999831	4542	145	0.868857	0.719729	1.04888	0.143406	0.998408	4252	150	0.863683	0.704078	1.05947	0.159771	0.801968	4228	124	0.802
TIAL1	seq.19131.184	1.04527	0.86207	1.2674	0.652467	0.998072	4567	172	1.08464	0.880214	1.33654	0.445746	0.999831	4542	145	1.07858	0.894035	1.30122	0.429471	0.998408	4252	150	1.14948	0.940364	1.4051	0.17389	0.801968	4228	124	0.802
POLR2K	seq.19134.66	1.00162	0.74675	1.34348	0.991366	0.998072	4567	172	1.1125	0.837813	1.47725	0.461195	0.999831	4542	145	1.10618	0.8264	1.48069	0.497566	0.998408	4252	150	1.24988	0.959936	1.62739	0.0976501	0.801521	4228	124	0.802
DAP	seq.19141.22	0.895386	0.75952	1.05556	0.188152	0.998072	4567	172	0.871898	0.728796	1.0431	0.133954	0.999831	4542	145	0.909087	0.762464	1.0839	0.288164	0.998408	4252	150	0.883844	0.728329	1.07256	0.211109	0.801968	4228	124	0.802
MREG	seq.19145.4	0.901797	0.765652	1.06215	0.215753	0.998072	4567	172	0.925298	0.779038	1.09902	0.376461	0.999831	4542	145	0.842225	0.699895	1.0135	0.0690607	0.951571	4252	150	0.868797	0.714006	1.05714	0.160051	0.801968	4228	124	0.802
TIMM8A	seq.19148.58	1.13033	0.936396	1.36442	0.202067	0.998072	4567	172	1.13173	0.925207	1.38436	0.228666	0.999831	4542	145	1.107	0.9151	1.33914	0.295301	0.998408	4252	150	1.15413	0.949779	1.40245	0.14937	0.801968	4228	124	0.802
PRPSAP2	seq.19150.20	0.948036	0.711997	1.26233	0.714889	0.998072	4567	172	1.11936	0.841787	1.48847	0.438038	0.999831	4542	145	1.0334	0.765317	1.3954	0.830202	0.998408	4252	150	1.23995	0.920211	1.67079	0.157508	0.801968	4228	124	0.802
USP15	seq.19161.1	0.943031	0.715346	1.24319	0.67738	0.998072	4567	172	1.07689	0.810095	1.43155	0.610038	0.999831	4542	145	1.06291	0.795737	1.4198	0.679548	0.998408	4252	150	1.24021	0.921358	1.66941	0.155662	0.801968	4228	124	0.802
ZFAND1	seq.19173.5	1.00732	0.734861	1.38079	0.963861	0.998072	4567	172	1.18811	0.853392	1.6541	0.307282	0.999831	4542	145	1.09324	0.779342	1.53356	0.605686	0.998408	4252	150	1.34521	0.962135	1.88079	0.0828728	0.801521	4228	124	0.802
STAMBP	seq.19187.21	1.04242	0.795263	1.36639	0.763499	0.998072	4567	172	1.17595	0.895506	1.54422	0.243613	0.999831	4542	145	1.08993	0.82101	1.44693	0.551384	0.998408	4252	150	1.25136	0.93758	1.67014	0.12791	0.801521	4228	124	0.802
NAP1L4	seq.19188.21	0.940314	0.677043	1.30596	0.713458	0.998072	4567	172	1.0991	0.771819	1.56517	0.60033	0.999831	4542	145	1.04186	0.729428	1.48813	0.821612	0.998408	4252	150	1.25865	0.871524	1.81772	0.219936	0.801968	4228	124	0.802
USP14	seq.19189.2	0.977666	0.761078	1.25589	0.859682	0.998072	4567	172	1.1428	0.890763	1.46616	0.293701	0.999831	4542	145	1.07076	0.816304	1.40454	0.621402	0.998408	4252	150	1.28094	0.97757	1.67846	0.0725753	0.801521	4228	124	0.802
ADK	seq.19207.119	0.979675	0.767723	1.25014	0.868876	0.998072	4567	172	1.06956	0.836621	1.36736	0.591548	0.999831	4542	145	1.04822	0.831767	1.321	0.689846	0.998408	4252	150	1.19495	0.957982	1.49054	0.114256	0.801521	4228	124	0.802
NUTF2	seq.19219.71	1.01242	0.851666	1.20351	0.888733	0.998072	4567	172	1.05153	0.877505	1.26008	0.586183	0.999831	4542	145	1.08214	0.922169	1.26986	0.333432	0.998408	4252	150	1.1453	0.9736	1.34729	0.1016	0.801521	4228	124	0.802
EIF1AY	seq.19224.5	0.936131	0.696637	1.25796	0.661546	0.998072	4567	172	1.1428	0.837938	1.55857	0.399147	0.999831	4542	145	0.991069	0.720992	1.36231	0.955924	0.998408	4252	150	1.23105	0.884627	1.71314	0.217611	0.801968	4228	124	0.802
GSTT1	seq.19230.12	0.900115	0.75669	1.07072	0.234704	0.998072	4567	172	0.902442	0.761779	1.06908	0.235085	0.999831	4542	145	0.829156	0.692149	0.993283	0.0420381	0.92329	4252	150	0.864374	0.70803	1.05524	0.152206	0.801968	4228	124	0.802
DDT	seq.19237.17	0.998296	0.85165	1.17019	0.983215	0.998072	4567	172	0.952542	0.782433	1.15963	0.628091	0.999831	4542	145	0.928315	0.789154	1.09202	0.369354	0.998408	4252	150	0.879498	0.718663	1.07633	0.21271	0.801968	4228	124	0.802
PDAP1	seq.19240.265	1.04835	0.781481	1.40635	0.75276	0.998072	4567	172	1.17397	0.865538	1.59232	0.302345	0.999831	4542	145	1.08746	0.796254	1.48516	0.598021	0.998408	4252	150	1.23286	0.893349	1.7014	0.202747	0.801968	4228	124	0.802
KARS1	seq.19249.18	0.924408	0.694546	1.23034	0.589981	0.998072	4567	172	1.14791	0.871766	1.51153	0.325843	0.999831	4542	145	0.985165	0.736561	1.31768	0.919764	0.998408	4252	150	1.22976	0.937764	1.61267	0.134813	0.801521	4228	124	0.802
MYCBP	seq.19250.50	0.941631	0.688661	1.28753	0.706343	0.998072	4567	172	1.09353	0.775262	1.54245	0.61042	0.999831	4542	145	1.02654	0.735323	1.4331	0.877695	0.998408	4252	150	1.249	0.879318	1.7741	0.214331	0.801968	4228	124	0.802
CLTA	seq.19257.11	1.13643	0.893534	1.44534	0.297213	0.998072	4567	172	1.12821	0.882816	1.44181	0.335055	0.999831	4542	145	1.22726	0.981436	1.53466	0.0725434	0.964377	4252	150	1.22455	0.97047	1.54516	0.0877536	0.801521	4228	124	0.802
ACADVL	seq.19262.219	1.00478	0.753111	1.34055	0.974137	0.998072	4567	172	1.11985	0.818931	1.53135	0.478358	0.999831	4542	145	1.1187	0.818543	1.52892	0.481596	0.998408	4252	150	1.27506	0.919094	1.76888	0.145707	0.801968	4228	124	0.802
EIF4E	seq.19263.147	0.938007	0.713147	1.23377	0.647186	0.998072	4567	172	1.11486	0.831719	1.49438	0.467015	0.999831	4542	145	1.02529	0.759019	1.38496	0.870699	0.998408	4252	150	1.25277	0.910259	1.72416	0.166673	0.801968	4228	124	0.802
IDH3G	seq.19275.68	1.09381	0.935829	1.27845	0.259895	0.998072	4567	172	1.13655	0.968153	1.33423	0.117719	0.999831	4542	145	1.10304	0.931245	1.30654	0.256224	0.998408	4252	150	1.1604	0.98094	1.3727	0.0826519	0.801521	4228	124	0.802
RAB13	seq.19282.3	0.975152	0.780421	1.21847	0.824784	0.998072	4567	172	1.0492	0.851279	1.29313	0.652506	0.999831	4542	145	1.08795	0.893387	1.32489	0.401724	0.998408	4252	150	1.16961	0.969617	1.41086	0.101522	0.801521	4228	124	0.802
CASQ2	seq.19291.2	0.98335	0.838857	1.15273	0.835957	0.998072	4567	172	0.864839	0.706108	1.05925	0.160441	0.999831	4542	145	0.962897	0.809633	1.14517	0.66905	0.998408	4252	150	0.830986	0.656115	1.05246	0.124582	0.801521	4228	124	0.802
COPE	seq.19310.81	1.08805	0.937703	1.26251	0.266033	0.998072	4567	172	1.06812	0.892339	1.27853	0.472545	0.999831	4542	145	1.13062	0.976042	1.30968	0.101691	0.998408	4252	150	1.12188	0.937986	1.34183	0.207993	0.801968	4228	124	0.802
ACP3	seq.19317.114	0.84475	0.662359	1.07737	0.173982	0.998072	4567	172	0.745105	0.547951	1.0132	0.0606021	0.999831	4542	145	0.849215	0.655413	1.10032	0.216221	0.998408	4252	150	0.722477	0.506493	1.03056	0.0728353	0.801521	4228	124	0.802
ACBD6	seq.19341.36	1.06173	0.877665	1.28439	0.537485	0.998072	4567	172	1.13786	0.923202	1.40242	0.225965	0.999831	4542	145	1.10488	0.897039	1.36088	0.348215	0.998408	4252	150	1.20425	0.95865	1.51276	0.110241	0.801521	4228	124	0.802
MYL12A	seq.19373.3	0.998356	0.718937	1.38637	0.992164	0.998193	4567	172	1.14816	0.804777	1.63806	0.446026	0.999831	4542	145	1.12841	0.797804	1.59603	0.494619	0.998408	4252	150	1.32274	0.930261	1.88081	0.119359	0.801521	4228	124	0.802
NNMT	seq.19376.74	0.912081	0.761583	1.09232	0.3172	0.998072	4567	172	0.871312	0.713094	1.06463	0.17785	0.999831	4542	145	0.886253	0.719931	1.091	0.254828	0.998408	4252	150	0.846788	0.667127	1.07483	0.171667	0.801968	4228	124	0.802
RAB3D	seq.19379.154	0.953851	0.692152	1.3145	0.772763	0.998072	4567	172	1.06063	0.773123	1.45507	0.715179	0.999831	4542	145	1.07172	0.785695	1.46187	0.6619	0.998408	4252	150	1.21309	0.908351	1.62007	0.190619	0.801968	4228	124	0.802
CINP	seq.19383.131	1.05411	0.91798	1.21043	0.455075	0.998072	4567	172	1.03752	0.897866	1.19889	0.61754	0.999831	4542	145	1.102	0.967537	1.25514	0.143492	0.998408	4252	150	1.1071	0.970046	1.26353	0.131303	0.801521	4228	124	0.802
DDAH1	seq.19392.6	1.01097	0.793698	1.28773	0.929562	0.998072	4567	172	1.10755	0.888465	1.38065	0.363689	0.999831	4542	145	1.07319	0.833894	1.38115	0.583179	0.998408	4252	150	1.17187	0.935574	1.46784	0.167468	0.801968	4228	124	0.802
KDSR	seq.19483.16	0.959352	0.827521	1.11218	0.582172	0.998072	4567	172	0.894435	0.759202	1.05376	0.182224	0.999831	4542	145	0.969235	0.834231	1.12609	0.683039	0.998408	4252	150	0.890132	0.754757	1.04979	0.166747	0.801968	4228	124	0.802
KAAG1	seq.19492.5	0.927085	0.783491	1.097	0.377895	0.998072	4567	172	0.879583	0.718544	1.07672	0.213649	0.999831	4542	145	0.901956	0.74625	1.09015	0.285849	0.998408	4252	150	0.841465	0.666392	1.06253	0.146964	0.801968	4228	124	0.802
DTYMK	seq.19504.22	0.932152	0.691751	1.2561	0.644301	0.998072	4567	172	1.12067	0.82551	1.52136	0.465097	0.999831	4542	145	1.03682	0.752882	1.42783	0.824742	0.998408	4252	150	1.27611	0.925633	1.75928	0.136676	0.801521	4228	124	0.802
HK3	seq.19518.12	0.956381	0.80445	1.13701	0.613353	0.998072	4567	172	0.902515	0.751252	1.08423	0.27312	0.999831	4542	145	0.917457	0.762178	1.10437	0.36249	0.998408	4252	150	0.839501	0.687774	1.0247	0.0854162	0.801521	4228	124	0.802
PLXND1	seq.19561.216	0.949533	0.787455	1.14497	0.587616	0.998072	4567	172	0.881656	0.721956	1.07668	0.216699	0.999831	4542	145	0.949246	0.770154	1.16998	0.62534	0.998408	4252	150	0.869243	0.694789	1.0875	0.220168	0.801968	4228	124	0.802
NT5C3A	seq.19615.213	0.975747	0.771038	1.2348	0.838064	0.998072	4567	172	1.03732	0.830125	1.29624	0.747205	0.999831	4542	145	1.08801	0.886064	1.33598	0.420693	0.998408	4252	150	1.17422	0.971735	1.4189	0.0962948	0.801521	4228	124	0.802
DLG2	seq.19620.16	0.967581	0.68765	1.36147	0.849985	0.998072	4567	172	1.08312	0.762085	1.53939	0.656196	0.999831	4542	145	1.10788	0.781657	1.57026	0.564803	0.998408	4252	150	1.25793	0.892745	1.77249	0.189676	0.801968	4228	124	0.802
FGL2	seq.19635.69	1.09166	0.899647	1.32465	0.37425	0.998072	4567	172	1.11925	0.910031	1.37656	0.285955	0.999831	4542	145	1.1472	0.936975	1.40458	0.183632	0.998408	4252	150	1.17657	0.940102	1.47251	0.155484	0.801968	4228	124	0.802
MVD	seq.19748.3	1.10719	0.921419	1.33041	0.277198	0.998072	4567	172	1.11323	0.9121	1.35872	0.291397	0.999831	4542	145	1.12934	0.941619	1.35448	0.189717	0.998408	4252	150	1.17584	0.973912	1.41964	0.0919847	0.801521	4228	124	0.802
ALDH1A2	seq.20055.40	0.938375	0.787345	1.11838	0.477443	0.998072	4567	172	0.937954	0.766954	1.14708	0.532786	0.999831	4542	145	0.83892	0.676065	1.04101	0.110702	0.998408	4252	150	0.84345	0.660954	1.07633	0.171107	0.801968	4228	124	0.802
MAGEA4	seq.20075.130	1.05644	0.910901	1.22523	0.467838	0.998072	4567	172	1.12553	0.970514	1.30531	0.117786	0.999831	4542	145	1.05685	0.901372	1.23914	0.495857	0.998408	4252	150	1.14808	0.981628	1.34277	0.0839933	0.801521	4228	124	0.802
PCK2	seq.20079.6	0.809996	0.671275	0.977384	0.0279003	0.998072	4567	172	0.848519	0.693222	1.0386	0.111221	0.999831	4542	145	0.809272	0.675854	0.969028	0.0213191	0.857608	4252	150	0.84118	0.690778	1.02433	0.0852813	0.801521	4228	124	0.802
UBE2E3	seq.20090.63	1.01647	0.802198	1.28798	0.892399	0.998072	4567	172	1.14228	0.913602	1.4282	0.243135	0.999831	4542	145	1.03961	0.805828	1.34121	0.765022	0.998408	4252	150	1.20032	0.949962	1.51665	0.126047	0.801521	4228	124	0.802
DCPS	seq.20106.80	0.908492	0.746221	1.10605	0.339093	0.998072	4567	172	0.892142	0.719228	1.10663	0.299141	0.999831	4542	145	0.873812	0.701355	1.08867	0.229145	0.998408	4252	150	0.84274	0.661274	1.074	0.166681	0.801968	4228	124	0.802
TCEA2	seq.20141.42	0.993479	0.827049	1.1934	0.944242	0.998072	4567	172	1.08583	0.916066	1.28705	0.342465	0.999831	4542	145	1.0336	0.856371	1.2475	0.730588	0.998408	4252	150	1.12993	0.94602	1.3496	0.177734	0.801968	4228	124	0.802
NCAM1	seq.20161.41	0.978739	0.815157	1.17515	0.81785	0.998072	4567	172	0.874699	0.722528	1.05892	0.16978	0.999831	4542	145	0.957689	0.760006	1.20679	0.71399	0.998408	4252	150	0.832728	0.650501	1.066	0.146297	0.801968	4228	124	0.802
COL9A3	seq.20175.17	1.21895	1.03187	1.43996	0.0198602	0.998072	4567	172	1.1786	0.97734	1.42131	0.0854175	0.999831	4542	145	1.24013	1.03244	1.48959	0.0213692	0.857608	4252	150	1.18206	0.956769	1.46041	0.121053	0.801521	4228	124	0.802
ITGA11	seq.20181.17	0.904334	0.778344	1.05072	0.188957	0.998072	4567	172	0.914105	0.780592	1.07046	0.264917	0.999831	4542	145	0.874116	0.731042	1.04519	0.140123	0.998408	4252	150	0.884753	0.739425	1.05864	0.181056	0.801968	4228	124	0.802
ITGAV|ITGB6	seq.20189.4	1.02251	0.806219	1.29681	0.854368	0.998072	4567	172	1.05287	0.821932	1.34868	0.683436	0.999831	4542	145	1.12619	0.914732	1.38654	0.262693	0.998408	4252	150	1.20088	0.978911	1.47319	0.0791593	0.801521	4228	124	0.802
IFIH1	seq.20195.13	0.890953	0.718001	1.10557	0.294368	0.998072	4567	172	0.874195	0.682257	1.12013	0.287762	0.999831	4542	145	0.804622	0.629665	1.02819	0.0822544	0.982561	4252	150	0.826655	0.631077	1.08284	0.166928	0.801968	4228	124	0.802
COQ9	seq.20374.41	1.06061	0.856952	1.31268	0.588539	0.998072	4567	172	1.2518	0.999471	1.56783	0.0505366	0.999831	4542	145	1.04802	0.832043	1.32006	0.690363	0.998408	4252	150	1.23009	0.958076	1.57934	0.104351	0.801521	4228	124	0.802
SVBP	seq.20379.59	0.889024	0.758454	1.04207	0.146646	0.998072	4567	172	0.900206	0.761123	1.0647	0.219527	0.999831	4542	145	0.853054	0.705992	1.03075	0.0997071	0.998408	4252	150	0.867903	0.708016	1.0639	0.172638	0.801968	4228	124	0.802
RBM18	seq.20383.31	0.773513	0.610613	0.979872	0.0332932	0.998072	4567	172	0.815328	0.654118	1.01627	0.0693066	0.999831	4542	145	0.797653	0.622342	1.02235	0.07419	0.967287	4252	150	0.844608	0.672955	1.06005	0.145132	0.801968	4228	124	0.802
IMMP2L	seq.20389.36	0.908766	0.771869	1.06994	0.250786	0.998072	4567	172	0.907044	0.756892	1.08698	0.290663	0.999831	4542	145	0.879858	0.739261	1.04719	0.149621	0.998408	4252	150	0.881527	0.728255	1.06706	0.195676	0.801968	4228	124	0.802
POP7	seq.20398.60	1.08289	0.91504	1.28154	0.354055	0.998072	4567	172	1.11642	0.933278	1.33549	0.228345	0.999831	4542	145	1.1083	0.923168	1.33056	0.270157	0.998408	4252	150	1.16693	0.960021	1.41843	0.121075	0.801521	4228	124	0.802
DNALI1	seq.20437.9	0.903565	0.749083	1.08991	0.289118	0.998072	4567	172	0.880759	0.703518	1.10265	0.26804	0.999831	4542	145	0.835291	0.67503	1.0336	0.0977361	0.998408	4252	150	0.800855	0.610088	1.05127	0.109641	0.801521	4228	124	0.802
TEN1	seq.20443.37	0.960076	0.838737	1.09897	0.554508	0.998072	4567	172	0.874999	0.746816	1.02518	0.0984816	0.999831	4542	145	0.970469	0.843126	1.11705	0.676181	0.998408	4252	150	0.872146	0.73746	1.03143	0.109952	0.801521	4228	124	0.802
NSMCE1	seq.20453.9	1.05859	0.91581	1.22362	0.441165	0.998072	4567	172	1.06689	0.929439	1.22467	0.357504	0.999831	4542	145	1.1147	0.954967	1.30115	0.168802	0.998408	4252	150	1.11387	0.963499	1.28771	0.14499	0.801968	4228	124	0.802
NDUFA2	seq.20458.22	0.993419	0.771645	1.27893	0.959143	0.998072	4567	172	1.05997	0.814988	1.37859	0.664047	0.999831	4542	145	1.13087	0.857121	1.49204	0.384459	0.998408	4252	150	1.2122	0.917484	1.60157	0.175727	0.801968	4228	124	0.802
FAM50A	seq.20461.58	0.828124	0.690351	0.993393	0.0422143	0.998072	4567	172	0.869872	0.725779	1.04257	0.131357	0.999831	4542	145	0.827054	0.687669	0.994691	0.0437447	0.92329	4252	150	0.852431	0.705194	1.03041	0.0988679	0.801521	4228	124	0.802
CD6	seq.20519.7	0.912014	0.773049	1.07596	0.27485	0.998072	4567	172	0.927433	0.775918	1.10854	0.407793	0.999831	4542	145	0.839028	0.694459	1.01369	0.0689026	0.951571	4252	150	0.832771	0.670698	1.03401	0.097486	0.801521	4228	124	0.802
IL1RAPL1	seq.20522.2	1.08137	0.918475	1.27315	0.34768	0.998072	4567	172	1.11715	0.93309	1.33751	0.227799	0.999831	4542	145	1.11512	0.936895	1.32725	0.220061	0.998408	4252	150	1.14384	0.94466	1.38501	0.168585	0.801968	4228	124	0.802
PDIA4	seq.20525.200	1.04898	0.775309	1.41924	0.756556	0.998072	4567	172	1.17	0.853821	1.60326	0.328668	0.999831	4542	145	1.17559	0.855502	1.61543	0.318486	0.998408	4252	150	1.33866	0.975204	1.83758	0.0711299	0.801521	4228	124	0.802
ESAM	seq.20536.11	1.14574	0.920656	1.42584	0.222778	0.998072	4567	172	1.2277	0.966491	1.55951	0.0928112	0.999831	4542	145	1.1149	0.889124	1.398	0.346155	0.998408	4252	150	1.221	0.952548	1.56512	0.114973	0.801521	4228	124	0.802
RTN4RL1	seq.20546.71	0.909386	0.752732	1.09864	0.32476	0.998072	4567	172	0.862784	0.698752	1.06532	0.170113	0.999831	4542	145	0.891136	0.727067	1.09223	0.266903	0.998408	4252	150	0.848174	0.668922	1.07546	0.174014	0.801968	4228	124	0.802
TLR10	seq.20563.48	1.10149	0.96054	1.26312	0.166453	0.998072	4567	172	1.07351	0.92078	1.25157	0.36498	0.999831	4542	145	1.14426	0.995292	1.31553	0.0582673	0.926806	4252	150	1.12104	0.958209	1.31155	0.153612	0.801968	4228	124	0.802
FZD8	seq.20577.5	1.12727	0.943165	1.34732	0.187896	0.998072	4567	172	1.1659	0.972574	1.39766	0.0970406	0.999831	4542	145	1.14933	0.941965	1.40234	0.170361	0.998408	4252	150	1.20112	0.976947	1.47673	0.0820859	0.801521	4228	124	0.802
GLDN	seq.20591.48	1.05842	0.898413	1.24693	0.497158	0.998072	4567	172	1.11869	0.937167	1.33538	0.214372	0.999831	4542	145	1.11	0.919537	1.33992	0.277208	0.998408	4252	150	1.18661	0.966316	1.45712	0.102473	0.801521	4228	124	0.802
NECAP2	seq.20915.68	0.964819	0.684061	1.36081	0.838256	0.998072	4567	172	1.1151	0.801876	1.55068	0.517261	0.999831	4542	145	1.04034	0.725482	1.49185	0.82973	0.998408	4252	150	1.24498	0.904513	1.7136	0.178852	0.801968	4228	124	0.802
TCEAL7	seq.20928.39	0.933716	0.806953	1.08039	0.356895	0.998072	4567	172	0.924935	0.776144	1.10225	0.38319	0.999831	4542	145	0.896874	0.766518	1.0494	0.174379	0.998408	4252	150	0.881301	0.722082	1.07563	0.213908	0.801968	4228	124	0.802
DR1	seq.20947.50	1.04059	0.848551	1.27608	0.702298	0.998072	4567	172	1.11585	0.894959	1.39127	0.330069	0.999831	4542	145	1.08925	0.881099	1.34657	0.429481	0.998408	4252	150	1.17594	0.93555	1.47811	0.164824	0.801968	4228	124	0.802
NUDT16	seq.20948.16	1.09097	0.822801	1.44655	0.545222	0.998072	4567	172	1.23543	0.925333	1.64945	0.151645	0.999831	4542	145	1.12117	0.837497	1.50091	0.442218	0.998408	4252	150	1.28258	0.961356	1.71113	0.0906358	0.801521	4228	124	0.802
PRTFDC1	seq.20950.159	1.01479	0.757866	1.35881	0.921492	0.998072	4567	172	1.13197	0.810819	1.58033	0.46652	0.999831	4542	145	1.10309	0.804893	1.51177	0.541736	0.998408	4252	150	1.27131	0.896176	1.80347	0.178449	0.801968	4228	124	0.802
RTL6	seq.20954.27	0.903099	0.752235	1.08422	0.274421	0.998072	4567	172	0.791321	0.619574	1.01068	0.0608017	0.999831	4542	145	0.908724	0.753645	1.09571	0.316073	0.998408	4252	150	0.820633	0.636779	1.05757	0.12664	0.801521	4228	124	0.802
PFDN4	seq.20956.13	0.997143	0.85111	1.16823	0.971755	0.998072	4567	172	1.05547	0.899763	1.23812	0.507359	0.999831	4542	145	1.06448	0.898483	1.26115	0.470031	0.998408	4252	150	1.13414	0.954568	1.34749	0.152347	0.801968	4228	124	0.802
DBNDD1	seq.20970.14	0.913646	0.773572	1.07908	0.287499	0.998072	4567	172	0.874639	0.731074	1.0464	0.143132	0.999831	4542	145	0.903447	0.757889	1.07696	0.257291	0.998408	4252	150	0.847253	0.697364	1.02936	0.095176	0.801521	4228	124	0.802
BEND6	seq.20993.13	0.876623	0.719775	1.06765	0.190473	0.998072	4567	172	0.820005	0.63621	1.0569	0.12537	0.999831	4542	145	0.886814	0.72644	1.08259	0.237902	0.998408	4252	150	0.851103	0.657957	1.10095	0.219571	0.801968	4228	124	0.802
PLEKHF2	seq.20994.37	0.945267	0.686787	1.30103	0.72982	0.998072	4567	172	1.1444	0.816361	1.60424	0.433836	0.999831	4542	145	1.02682	0.727747	1.44879	0.880237	0.998408	4252	150	1.27303	0.895321	1.81009	0.178863	0.801968	4228	124	0.802
POLR2J2	seq.21000.40	1.06776	0.91849	1.24128	0.393481	0.998072	4567	172	1.08966	0.935097	1.26978	0.271246	0.999831	4542	145	1.1048	0.956407	1.27623	0.175628	0.998408	4252	150	1.13399	0.98292	1.30829	0.0847384	0.801521	4228	124	0.802
BRK1	seq.21001.393	1.07369	0.910296	1.26642	0.398581	0.998072	4567	172	1.10282	0.917575	1.32547	0.296879	0.999831	4542	145	1.11219	0.930143	1.32986	0.243644	0.998408	4252	150	1.16202	0.953164	1.41665	0.137417	0.801521	4228	124	0.802
NUDCD2	seq.21002.1	0.977517	0.817167	1.16933	0.80355	0.998072	4567	172	1.05517	0.884982	1.25808	0.549577	0.999831	4542	145	1.04368	0.860953	1.26518	0.663306	0.998408	4252	150	1.13432	0.932916	1.3792	0.20633	0.801968	4228	124	0.802
MAGOH	seq.21008.113	1.01318	0.855614	1.19977	0.879294	0.998072	4567	172	1.11229	0.943315	1.31153	0.205561	0.999831	4542	145	1.00642	0.842869	1.20171	0.943612	0.998408	4252	150	1.1242	0.947757	1.3335	0.178945	0.801968	4228	124	0.802
SNTN	seq.21009.28	0.934665	0.774033	1.12863	0.482507	0.998072	4567	172	0.957096	0.783889	1.16858	0.666813	0.999831	4542	145	0.775079	0.59456	1.01041	0.0596359	0.929439	4252	150	0.823104	0.620271	1.09227	0.177463	0.801968	4228	124	0.802
CETN1	seq.21106.206	0.908259	0.769719	1.07173	0.254467	0.998072	4567	172	0.87846	0.708342	1.08943	0.238	0.999831	4542	145	0.88765	0.739187	1.06593	0.201869	0.998408	4252	150	0.852559	0.669654	1.08542	0.195423	0.801968	4228	124	0.802
NDUFAF1	seq.21107.5	1.11958	0.968936	1.29365	0.125523	0.998072	4567	172	1.09404	0.93399	1.28152	0.265382	0.999831	4542	145	1.15781	0.997046	1.34449	0.0547054	0.926196	4252	150	1.13094	0.958974	1.33374	0.143685	0.801968	4228	124	0.802
UBE2Z	seq.21110.5	0.962996	0.752177	1.2329	0.764857	0.998072	4567	172	1.10822	0.888933	1.3816	0.361019	0.999831	4542	145	1.0111	0.788088	1.29721	0.930827	0.998408	4252	150	1.1562	0.93359	1.43189	0.183453	0.801968	4228	124	0.802
GCHFR	seq.21118.48	1.01294	0.837369	1.22533	0.894644	0.998072	4567	172	1.10796	0.916057	1.34007	0.290742	0.999831	4542	145	1.08587	0.881184	1.33809	0.439506	0.998408	4252	150	1.15657	0.932731	1.43412	0.185027	0.801968	4228	124	0.802
CBR4	seq.21119.1	0.90098	0.773705	1.04919	0.179601	0.998072	4567	172	0.879246	0.739215	1.0458	0.145946	0.999831	4542	145	0.886718	0.748177	1.05091	0.165417	0.998408	4252	150	0.879001	0.724729	1.06611	0.190258	0.801968	4228	124	0.802
DBNDD2	seq.21122.3	0.958542	0.830199	1.10673	0.563722	0.998072	4567	172	0.919717	0.780152	1.08425	0.318923	0.999831	4542	145	0.931274	0.799831	1.08432	0.359031	0.998408	4252	150	0.889686	0.747802	1.05849	0.18727	0.801968	4228	124	0.802
YAE1	seq.21124.17	1.12951	0.981575	1.29974	0.0890659	0.998072	4567	172	1.10077	0.938327	1.29135	0.238557	0.999831	4542	145	1.12843	0.984451	1.29346	0.0827465	0.983043	4252	150	1.10579	0.947553	1.29046	0.201855	0.801968	4228	124	0.802
CDK2	seq.21128.2	0.955567	0.765189	1.19331	0.688463	0.998072	4567	172	1.03343	0.830088	1.28658	0.768647	0.999831	4542	145	1.04758	0.832692	1.31792	0.691476	0.998408	4252	150	1.17387	0.943542	1.46043	0.150288	0.801968	4228	124	0.802
SF3B6	seq.21135.16	0.869984	0.724196	1.04512	0.136648	0.998072	4567	172	0.893135	0.737711	1.08131	0.246609	0.999831	4542	145	0.829139	0.667672	1.02966	0.0899731	0.988618	4252	150	0.856989	0.679245	1.08124	0.193142	0.801968	4228	124	0.802
LRATD2	seq.21141.9	0.815724	0.683587	0.973402	0.0238842	0.998072	4567	172	0.836049	0.68892	1.0146	0.0697959	0.999831	4542	145	0.816205	0.675473	0.986258	0.0354386	0.903038	4252	150	0.838669	0.681407	1.03223	0.0967865	0.801521	4228	124	0.802
MRM2	seq.21161.16	0.835383	0.703011	0.99268	0.0410063	0.998072	4567	172	0.823733	0.674765	1.00559	0.0567475	0.999831	4542	145	0.844382	0.704845	1.01154	0.0664364	0.949223	4252	150	0.847631	0.688281	1.04387	0.11974	0.801521	4228	124	0.802
CIAO1	seq.21178.8	0.926117	0.678185	1.26469	0.629221	0.998072	4567	172	1.09736	0.79398	1.51667	0.573613	0.999831	4542	145	1.06216	0.765069	1.47461	0.71867	0.998408	4252	150	1.29632	0.938972	1.78966	0.114727	0.801521	4228	124	0.802
BLOC1S2	seq.21184.1	0.869365	0.704476	1.07285	0.192005	0.998072	4567	172	0.803648	0.623617	1.03565	0.0911639	0.999831	4542	145	0.836763	0.659678	1.06139	0.141847	0.998408	4252	150	0.820093	0.622137	1.08104	0.159379	0.801968	4228	124	0.802
RWDD4	seq.21188.38	0.973145	0.710563	1.33276	0.865272	0.998072	4567	172	1.15882	0.842957	1.59303	0.363974	0.999831	4542	145	1.0623	0.769324	1.46684	0.713557	0.998408	4252	150	1.28532	0.946097	1.74616	0.108369	0.801521	4228	124	0.802
NUBP1	seq.21189.9	1.0809	0.850417	1.37386	0.524906	0.998072	4567	172	1.17702	0.943449	1.46842	0.148687	0.999831	4542	145	1.1196	0.866965	1.44585	0.386576	0.998408	4252	150	1.23175	0.97853	1.55049	0.0758721	0.801521	4228	124	0.802
HAX1	seq.21206.218	1.05173	0.879595	1.25755	0.58021	0.998072	4567	172	1.04861	0.864659	1.27169	0.629596	0.999831	4542	145	1.12796	0.932623	1.36422	0.214581	0.998408	4252	150	1.14406	0.92839	1.40984	0.206657	0.801968	4228	124	0.802
PHB2	seq.21217.20	1.05255	0.89559	1.23703	0.534183	0.998072	4567	172	1.11809	0.945359	1.32239	0.192328	0.999831	4542	145	1.09272	0.910435	1.31149	0.340962	0.998408	4252	150	1.15744	0.958933	1.39704	0.12772	0.801521	4228	124	0.802
CHRNA5	seq.21231.3	0.850904	0.715443	1.01201	0.0679961	0.998072	4567	172	0.852669	0.692737	1.04952	0.132604	0.999831	4542	145	0.85547	0.711438	1.02866	0.0970004	0.998408	4252	150	0.846548	0.669917	1.06975	0.162934	0.801968	4228	124	0.802
KPNA5	seq.21235.11	0.987689	0.69953	1.39455	0.943888	0.998072	4567	172	1.07288	0.747604	1.53968	0.70269	0.999831	4542	145	1.13665	0.789819	1.63578	0.490437	0.998408	4252	150	1.26034	0.872933	1.81969	0.21691	0.801968	4228	124	0.802
CDK5RAP3	seq.21238.40	1.03136	0.883529	1.20393	0.69565	0.998072	4567	172	1.06247	0.902166	1.25125	0.467739	0.999831	4542	145	1.06884	0.910612	1.25457	0.415377	0.998408	4252	150	1.11506	0.940688	1.32176	0.209382	0.801968	4228	124	0.802
DHRS4	seq.21308.44	1.09488	0.937628	1.2785	0.251852	0.998072	4567	172	1.07742	0.903047	1.28547	0.407745	0.999831	4542	145	1.15184	0.991563	1.33803	0.0644332	0.940944	4252	150	1.14831	0.969268	1.36043	0.109806	0.801521	4228	124	0.802
NKIRAS1	seq.21317.25	0.818242	0.639163	1.04749	0.11143	0.998072	4567	172	0.770711	0.580438	1.02336	0.0718004	0.999831	4542	145	0.772686	0.600936	0.993522	0.0443602	0.92329	4252	150	0.800042	0.596578	1.0729	0.136213	0.801521	4228	124	0.802
MRM1	seq.21319.196	0.853707	0.684225	1.06517	0.161263	0.998072	4567	172	0.904439	0.720988	1.13457	0.385167	0.999831	4542	145	0.783667	0.623085	0.985634	0.0371888	0.92329	4252	150	0.825152	0.649496	1.04831	0.115567	0.801521	4228	124	0.802
RWDD1	seq.21323.2	0.910437	0.664024	1.24829	0.560089	0.998072	4567	172	1.08906	0.781525	1.51761	0.614306	0.999831	4542	145	1.01203	0.726976	1.40886	0.943516	0.998408	4252	150	1.24405	0.893847	1.73147	0.195431	0.801968	4228	124	0.802
TBCC	seq.21326.28	0.820007	0.642688	1.04625	0.110422	0.998072	4567	172	0.795254	0.620449	1.01931	0.0704536	0.999831	4542	145	0.875625	0.70306	1.09054	0.235619	0.998408	4252	150	0.873614	0.705073	1.08244	0.216619	0.801968	4228	124	0.802
MSI2	seq.21366.7	1.06817	0.773722	1.47469	0.688546	0.998072	4567	172	1.15955	0.828856	1.62219	0.387482	0.999831	4542	145	1.07437	0.774601	1.49014	0.667369	0.998408	4252	150	1.25852	0.90769	1.74495	0.167864	0.801968	4228	124	0.802
RTCA	seq.21369.15	0.935319	0.698093	1.25316	0.654145	0.998072	4567	172	1.16109	0.863917	1.56048	0.322073	0.999831	4542	145	1.01205	0.737363	1.38906	0.940906	0.998408	4252	150	1.29093	0.943103	1.76705	0.110873	0.801521	4228	124	0.802
TBC1D22B	seq.21381.73	1.14718	0.961798	1.3683	0.126795	0.998072	4567	172	1.15395	0.95203	1.39869	0.144543	0.999831	4542	145	1.09638	0.908933	1.32248	0.336129	0.998408	4252	150	1.16012	0.94995	1.41678	0.145262	0.801968	4228	124	0.802
PCDH17	seq.21395.23	0.874859	0.724463	1.05648	0.164786	0.998072	4567	172	0.813034	0.661224	0.999697	0.0496611	0.999831	4542	145	0.896646	0.730364	1.10078	0.297202	0.998408	4252	150	0.834515	0.662937	1.0505	0.123444	0.801521	4228	124	0.802
THOP1	seq.21429.50	0.816082	0.644484	1.03337	0.0915123	0.998072	4567	172	0.758764	0.584644	0.98474	0.0379293	0.999831	4542	145	0.865769	0.662642	1.13116	0.290708	0.998408	4252	150	0.781571	0.579845	1.05348	0.105666	0.801521	4228	124	0.802
KLK2	seq.21444.40	1.15932	0.998175	1.34649	0.052858	0.998072	4567	172	1.1503	0.967314	1.3679	0.113182	0.999831	4542	145	1.16651	0.997513	1.36413	0.0537545	0.926196	4252	150	1.15522	0.962406	1.38666	0.121453	0.801521	4228	124	0.802
NEDD8	seq.21445.40	0.946579	0.688002	1.30234	0.735926	0.998072	4567	172	1.14555	0.820119	1.60012	0.425473	0.999831	4542	145	1.0238	0.729146	1.43752	0.891957	0.998408	4252	150	1.27026	0.901737	1.78938	0.171201	0.801968	4228	124	0.802
NEIL2	seq.21476.43	0.932249	0.772843	1.12453	0.463399	0.998072	4567	172	0.871689	0.710513	1.06943	0.188004	0.999831	4542	145	0.896865	0.718078	1.12016	0.33725	0.998408	4252	150	0.802444	0.626856	1.02721	0.0806571	0.801521	4228	124	0.802
GPR37	seq.21495.134	1.11434	0.928035	1.33805	0.246104	0.998072	4567	172	1.14848	0.942416	1.3996	0.170017	0.999831	4542	145	1.16568	0.955456	1.42215	0.130812	0.998408	4252	150	1.21255	0.978175	1.50309	0.0786382	0.801521	4228	124	0.802
COQ7	seq.21499.17	0.903426	0.752846	1.08413	0.274953	0.998072	4567	172	0.832227	0.654851	1.05765	0.133176	0.999831	4542	145	0.89979	0.733575	1.10367	0.310879	0.998408	4252	150	0.850967	0.658043	1.10045	0.218595	0.801968	4228	124	0.802
AGO2	seq.21504.41	0.990592	0.796746	1.2316	0.932197	0.998072	4567	172	1.11621	0.904634	1.37728	0.305215	0.999831	4542	145	1.05093	0.82826	1.33346	0.682602	0.998408	4252	150	1.20039	0.949835	1.51705	0.126234	0.801521	4228	124	0.802
GLT8D2	seq.21509.29	1.12421	0.983603	1.28491	0.0858937	0.998072	4567	172	1.09129	0.940103	1.2668	0.250882	0.999831	4542	145	1.14663	1.00049	1.31412	0.0491745	0.92329	4252	150	1.10998	0.949862	1.29708	0.189251	0.801968	4228	124	0.802
MUSTN1	seq.21545.51	1.0601	0.913557	1.23016	0.44193	0.998072	4567	172	1.12616	0.963814	1.31586	0.134665	0.999831	4542	145	1.03545	0.880868	1.21716	0.672804	0.998408	4252	150	1.11821	0.944886	1.32333	0.193511	0.801968	4228	124	0.802
FKBP5	seq.21577.35	1.02933	0.750239	1.41226	0.8578	0.998072	4567	172	1.1431	0.838043	1.5592	0.398425	0.999831	4542	145	1.12974	0.832966	1.53226	0.432701	0.998408	4252	150	1.28154	0.95789	1.71455	0.0948575	0.801521	4228	124	0.802
DPPA4	seq.21589.80	0.890803	0.744047	1.06651	0.208043	0.998072	4567	172	0.881508	0.715531	1.08599	0.236026	0.999831	4542	145	0.859606	0.701182	1.05382	0.14551	0.998408	4252	150	0.865879	0.691432	1.08434	0.209624	0.801968	4228	124	0.802
ANKRA2	seq.21590.9	0.884168	0.761124	1.0271	0.107352	0.998072	4567	172	0.865757	0.735508	1.01907	0.0831163	0.999831	4542	145	0.882271	0.749283	1.03886	0.132939	0.998408	4252	150	0.863061	0.716293	1.0399	0.12148	0.801521	4228	124	0.802
CTNNBIP1	seq.21600.10	1.02084	0.831897	1.25269	0.843449	0.998072	4567	172	1.04358	0.838751	1.29844	0.701968	0.999831	4542	145	1.14389	0.921912	1.41931	0.221959	0.998408	4252	150	1.18936	0.944648	1.49748	0.140075	0.801968	4228	124	0.802
CUTA	seq.21604.2	0.913481	0.799594	1.04359	0.182859	0.998072	4567	172	0.923891	0.802583	1.06354	0.270343	0.999831	4542	145	0.887726	0.770765	1.02244	0.0984955	0.998408	4252	150	0.896123	0.772075	1.0401	0.14908	0.801968	4228	124	0.802
TXNL4A	seq.21651.9	1.07684	0.915016	1.26728	0.372916	0.998072	4567	172	1.01875	0.860014	1.20678	0.829813	0.999831	4542	145	1.17264	0.980576	1.40232	0.0809732	0.980121	4252	150	1.13244	0.9398	1.36457	0.191088	0.801968	4228	124	0.802
URM1	seq.21653.205	1.0912	0.950568	1.25264	0.215033	0.998072	4567	172	1.11366	0.963933	1.28665	0.14392	0.999831	4542	145	1.11702	0.970485	1.28568	0.122971	0.998408	4252	150	1.12959	0.973116	1.31123	0.109206	0.801521	4228	124	0.802
FAM20C	seq.21661.82	0.955635	0.78859	1.15806	0.643408	0.998072	4567	172	0.911527	0.73781	1.12614	0.390491	0.999831	4542	145	0.899095	0.73066	1.10636	0.314895	0.998408	4252	150	0.844258	0.673897	1.05769	0.140948	0.801968	4228	124	0.802
DYRK3	seq.21662.121	0.916481	0.760262	1.1048	0.360346	0.998072	4567	172	0.886289	0.719069	1.0924	0.257815	0.999831	4542	145	0.897573	0.732054	1.10051	0.298779	0.998408	4252	150	0.857469	0.679045	1.08277	0.196402	0.801968	4228	124	0.802
SERPINB2	seq.21676.17	0.88949	0.729181	1.08504	0.248085	0.998072	4567	172	0.868673	0.696694	1.0831	0.211016	0.999831	4542	145	0.897242	0.738128	1.09065	0.276286	0.998408	4252	150	0.86385	0.690696	1.08041	0.199723	0.801968	4228	124	0.802
ITGA11|ITGB1	seq.21698.11	0.989954	0.822309	1.19178	0.91506	0.998072	4567	172	0.951385	0.773746	1.16981	0.63648	0.999831	4542	145	0.927626	0.762936	1.12787	0.451228	0.998408	4252	150	0.869892	0.697584	1.08476	0.21586	0.801968	4228	124	0.802
ACVR1	seq.21703.31	1.10927	0.959961	1.28179	0.159732	0.998072	4567	172	1.08155	0.914093	1.27969	0.361018	0.999831	4542	145	1.15893	0.995449	1.34927	0.0572758	0.926638	4252	150	1.14831	0.967374	1.36308	0.113919	0.801521	4228	124	0.802
ADGRB1	seq.21711.86	1.14556	0.998628	1.31411	0.0523312	0.998072	4567	172	1.14564	0.987831	1.32865	0.0721654	0.999831	4542	145	1.11211	0.94394	1.31024	0.203976	0.998408	4252	150	1.13889	0.960585	1.35029	0.134367	0.801521	4228	124	0.802
RELN	seq.21713.11	1.15228	0.981471	1.35281	0.083358	0.998072	4567	172	1.08839	0.911526	1.29957	0.349195	0.999831	4542	145	1.22396	1.02628	1.45973	0.0245374	0.857608	4252	150	1.14698	0.941802	1.39687	0.172651	0.801968	4228	124	0.802
USP2	seq.21728.4	0.926546	0.794321	1.08078	0.331487	0.998072	4567	172	0.876063	0.720124	1.06577	0.185808	0.999831	4542	145	0.891779	0.748868	1.06196	0.198674	0.998408	4252	150	0.840129	0.667478	1.05744	0.137763	0.801521	4228	124	0.802
USP1	seq.21740.26	1.01427	0.851216	1.20855	0.87413	0.998072	4567	172	0.834682	0.646642	1.0774	0.165276	0.999831	4542	145	0.985552	0.811008	1.19766	0.883655	0.998408	4252	150	0.798413	0.591382	1.07792	0.14155	0.801968	4228	124	0.802
UBE2N|UBE2V1	seq.21747.114	0.937166	0.70763	1.24116	0.650729	0.998072	4567	172	1.11641	0.846199	1.47291	0.436067	0.999831	4542	145	1.01207	0.749396	1.36682	0.937616	0.998408	4252	150	1.22674	0.911796	1.65047	0.177014	0.801968	4228	124	0.802
UBE2N|UBE2V2	seq.21756.5	0.938377	0.693604	1.26953	0.680008	0.998072	4567	172	1.13559	0.836288	1.54201	0.415292	0.999831	4542	145	1.00749	0.727161	1.3959	0.964201	0.998408	4252	150	1.24269	0.89912	1.71754	0.188189	0.801968	4228	124	0.802
USP22	seq.21757.49	0.995551	0.783323	1.26528	0.970924	0.998072	4567	172	1.06898	0.833579	1.37086	0.599145	0.999831	4542	145	1.06966	0.858291	1.33309	0.548807	0.998408	4252	150	1.15894	0.924607	1.45266	0.200594	0.801968	4228	124	0.802
USP1|WDR48	seq.21759.23	0.965877	0.826933	1.12817	0.661287	0.998072	4567	172	0.89879	0.748749	1.0789	0.252178	0.999831	4542	145	0.906397	0.772151	1.06398	0.22949	0.998408	4252	150	0.861949	0.716492	1.03693	0.115166	0.801521	4228	124	0.802
XYLB	seq.21769.10	1.07672	0.926816	1.25087	0.333852	0.998072	4567	172	1.09843	0.940175	1.28332	0.236892	0.999831	4542	145	1.109	0.944167	1.3026	0.207603	0.998408	4252	150	1.1465	0.976087	1.34667	0.0958741	0.801521	4228	124	0.802
MYL9	seq.21817.5	1.02614	0.732877	1.43675	0.880565	0.998072	4567	172	1.01399	0.716093	1.4358	0.937614	0.999831	4542	145	1.19954	0.869939	1.65402	0.267015	0.998408	4252	150	1.23668	0.893118	1.71241	0.200797	0.801968	4228	124	0.802
RACK1	seq.21857.26	1.01014	0.800679	1.2744	0.932181	0.998072	4567	172	1.20425	0.953279	1.5213	0.119063	0.999831	4542	145	1.02133	0.794889	1.31227	0.868931	0.998408	4252	150	1.20774	0.932271	1.56459	0.152998	0.801968	4228	124	0.802
F11	seq.2190.55	0.892967	0.754071	1.05745	0.189376	0.998072	4567	172	0.857093	0.715987	1.02601	0.092911	0.999831	4542	145	0.913124	0.745412	1.11857	0.380066	0.998408	4252	150	0.841569	0.674624	1.04983	0.126272	0.801521	4228	124	0.802
ITGAL|ITGB2	seq.21903.6	0.982818	0.860014	1.12316	0.799106	0.998072	4567	172	0.899311	0.764184	1.05833	0.201415	0.999831	4542	145	0.949391	0.813754	1.10764	0.509074	0.998408	4252	150	0.858877	0.71011	1.03881	0.116966	0.801521	4228	124	0.802
ITGA5|ITGB1	seq.21909.2	0.9348	0.79919	1.09342	0.399145	0.998072	4567	172	0.894355	0.750024	1.06646	0.213711	0.999831	4542	145	0.90784	0.757568	1.08792	0.294979	0.998408	4252	150	0.853996	0.693815	1.05116	0.136428	0.801521	4228	124	0.802
TGFB1	seq.21925.15	0.912087	0.781606	1.06435	0.242706	0.998072	4567	172	0.937422	0.794517	1.10603	0.443815	0.999831	4542	145	0.84944	0.702518	1.02709	0.0921526	0.99316	4252	150	0.861247	0.696892	1.06436	0.166778	0.801968	4228	124	0.802
UBE2D1|UBB	seq.21926.24	0.961137	0.746418	1.23762	0.758624	0.998072	4567	172	1.16482	0.891837	1.52136	0.2628	0.999831	4542	145	1.00683	0.77002	1.31648	0.960296	0.998408	4252	150	1.23257	0.927288	1.63836	0.149842	0.801968	4228	124	0.802
NAE1|UBA3	seq.21939.6	1.04991	0.790162	1.39505	0.736961	0.998072	4567	172	1.21459	0.922503	1.59917	0.16598	0.999831	4542	145	1.05261	0.779922	1.42063	0.737507	0.998408	4252	150	1.23699	0.925824	1.65274	0.150246	0.801968	4228	124	0.802
PIK3AP1	seq.21957.12	0.847198	0.682291	1.05196	0.133266	0.998072	4567	172	0.799298	0.629698	1.01458	0.0656119	0.999831	4542	145	0.806757	0.621227	1.0477	0.10728	0.998408	4252	150	0.769395	0.577124	1.02572	0.0739554	0.801521	4228	124	0.802
PDP1	seq.22005.8	0.796142	0.63007	1.00599	0.0561339	0.998072	4567	172	0.761867	0.586562	0.989567	0.041489	0.999831	4542	145	0.818535	0.642726	1.04244	0.104563	0.998408	4252	150	0.806663	0.624486	1.04198	0.0999509	0.801521	4228	124	0.802
MAP2K5	seq.22041.26	1.02527	0.764473	1.37504	0.867643	0.998072	4567	172	1.20421	0.885565	1.6375	0.236019	0.999831	4542	145	1.0661	0.777946	1.46099	0.690531	0.998408	4252	150	1.25362	0.902708	1.74094	0.177309	0.801968	4228	124	0.802
KXD1	seq.22050.19	0.900962	0.742695	1.09296	0.289987	0.998072	4567	172	0.8069	0.633167	1.0283	0.0828505	0.999831	4542	145	0.819216	0.647845	1.03592	0.0958528	0.998408	4252	150	0.755388	0.555328	1.02752	0.0739294	0.801521	4228	124	0.802
PPP2R5D	seq.22068.5	1.07081	0.878496	1.30522	0.498175	0.998072	4567	172	1.08049	0.870684	1.34086	0.482161	0.999831	4542	145	1.14762	0.930714	1.41507	0.197672	0.998408	4252	150	1.18854	0.95083	1.48567	0.129234	0.801521	4228	124	0.802
ATP5PB	seq.22073.47	1.12995	0.969415	1.31708	0.118126	0.998072	4567	172	1.13855	0.962801	1.34638	0.129305	0.999831	4542	145	1.09953	0.932825	1.29602	0.258035	0.998408	4252	150	1.11692	0.936135	1.33262	0.219666	0.801968	4228	124	0.802
ATOH1	seq.22076.34	1.02167	0.859	1.21513	0.808586	0.998072	4567	172	0.896206	0.706091	1.13751	0.367672	0.999831	4542	145	0.941686	0.75348	1.1769	0.59739	0.998408	4252	150	0.820683	0.599063	1.12429	0.218503	0.801968	4228	124	0.802
ATP23	seq.22077.46	1.02012	0.872249	1.19306	0.803111	0.998072	4567	172	0.860664	0.680243	1.08894	0.211251	0.999831	4542	145	1.01464	0.850188	1.2109	0.872014	0.998408	4252	150	0.836237	0.635718	1.1	0.201043	0.801968	4228	124	0.802
TIMP1	seq.2211.9	0.894636	0.742599	1.0778	0.241359	0.998072	4567	172	0.850901	0.697953	1.03737	0.110238	0.999831	4542	145	0.881735	0.719559	1.08046	0.224855	0.998408	4252	150	0.830316	0.664812	1.03702	0.101115	0.801521	4228	124	0.802
DCAF11	seq.22120.4	1.11779	0.962749	1.29779	0.143832	0.998072	4567	172	1.14141	0.969709	1.34351	0.111794	0.999831	4542	145	1.12359	0.94661	1.33366	0.182676	0.998408	4252	150	1.14672	0.959171	1.37095	0.132964	0.801521	4228	124	0.802
DYTN	seq.22124.94	1.14973	0.946437	1.39669	0.159881	0.998072	4567	172	1.18234	0.960371	1.45562	0.11437	0.999831	4542	145	1.14518	0.932609	1.4062	0.19566	0.998408	4252	150	1.17563	0.941835	1.46746	0.152634	0.801968	4228	124	0.802
ELL3	seq.22129.55	0.867872	0.74971	1.00466	0.0577249	0.998072	4567	172	0.845847	0.711822	1.00511	0.0571544	0.999831	4542	145	0.895775	0.76705	1.0461	0.164355	0.998408	4252	150	0.87998	0.73579	1.05243	0.161408	0.801968	4228	124	0.802
FAM102B	seq.22137.3	0.925674	0.794968	1.07787	0.319995	0.998072	4567	172	0.940944	0.781101	1.1335	0.521638	0.999831	4542	145	0.817366	0.660755	1.0111	0.0631233	0.940117	4252	150	0.817176	0.613414	1.08862	0.167673	0.801968	4228	124	0.802
FBXO48	seq.22144.65	1.00249	0.838663	1.19832	0.978194	0.998072	4567	172	0.855824	0.689836	1.06175	0.15698	0.999831	4542	145	0.998473	0.816701	1.2207	0.988108	0.998408	4252	150	0.841545	0.662699	1.06866	0.156992	0.801968	4228	124	0.802
FOSL2	seq.22146.20	0.880871	0.737074	1.05272	0.163025	0.998072	4567	172	0.856274	0.697288	1.05151	0.138687	0.999831	4542	145	0.85718	0.701402	1.04756	0.132072	0.998408	4252	150	0.854097	0.678648	1.0749	0.17885	0.801968	4228	124	0.802
FUNDC1	seq.22149.2	0.959747	0.81833	1.1256	0.613434	0.998072	4567	172	0.872121	0.729879	1.04208	0.132011	0.999831	4542	145	0.912806	0.77469	1.07555	0.275743	0.998408	4252	150	0.851828	0.698545	1.03875	0.113099	0.801521	4228	124	0.802
GALNT9	seq.22152.162	0.902238	0.752428	1.08187	0.266777	0.998072	4567	172	0.866135	0.694039	1.0809	0.203504	0.999831	4542	145	0.851554	0.701218	1.03412	0.104919	0.998408	4252	150	0.830668	0.660188	1.04517	0.113419	0.801521	4228	124	0.802
DMRTC2	seq.22369.12	1.0484	0.888802	1.23666	0.574818	0.998072	4567	172	1.11159	0.947466	1.30415	0.19431	0.999831	4542	145	1.06096	0.886937	1.26913	0.517379	0.998408	4252	150	1.12139	0.940767	1.33669	0.201043	0.801968	4228	124	0.802
HOXA11	seq.22375.15	1.02255	0.855385	1.22237	0.806601	0.998072	4567	172	1.06665	0.891369	1.2764	0.48115	0.999831	4542	145	1.09027	0.910255	1.30589	0.347883	0.998408	4252	150	1.12988	0.940171	1.35788	0.192867	0.801968	4228	124	0.802
HOXA5	seq.22376.95	0.906578	0.7789	1.05519	0.205372	0.998072	4567	172	0.889065	0.754083	1.04821	0.161638	0.999831	4542	145	0.893428	0.750391	1.06373	0.205531	0.998408	4252	150	0.860582	0.707911	1.04618	0.131831	0.801521	4228	124	0.802
LACTB2	seq.22381.1	0.986173	0.728159	1.33561	0.92831	0.998072	4567	172	1.14957	0.849894	1.55491	0.365709	0.999831	4542	145	1.09091	0.789773	1.50688	0.597518	0.998408	4252	150	1.29123	0.947272	1.76007	0.105825	0.801521	4228	124	0.802
PWWP3A	seq.22385.2	1.09411	0.931846	1.28463	0.272136	0.998072	4567	172	1.10862	0.949618	1.29424	0.191724	0.999831	4542	145	1.10318	0.937103	1.29869	0.238153	0.998408	4252	150	1.11015	0.943111	1.30677	0.209118	0.801968	4228	124	0.802
ZFP36	seq.22395.7	0.913385	0.75871	1.09959	0.338534	0.998072	4567	172	0.872724	0.725949	1.04918	0.147327	0.999831	4542	145	0.921587	0.76115	1.11584	0.402713	0.998408	4252	150	0.867765	0.714812	1.05345	0.151661	0.801968	4228	124	0.802
TLK1	seq.22414.127	0.994933	0.790076	1.25291	0.965556	0.998072	4567	172	1.058	0.852637	1.31283	0.608604	0.999831	4542	145	1.0911	0.877888	1.35609	0.43189	0.998408	4252	150	1.16596	0.953123	1.42632	0.135407	0.801521	4228	124	0.802
PELI1	seq.22421.79	0.849924	0.713526	1.0124	0.068462	0.998072	4567	172	0.865706	0.723612	1.0357	0.114911	0.999831	4542	145	0.8454	0.703041	1.01659	0.0742382	0.967287	4252	150	0.851408	0.696382	1.04094	0.116721	0.801521	4228	124	0.802
TCF12	seq.22472.4	1.11674	0.955534	1.30515	0.16509	0.998072	4567	172	1.09692	0.924756	1.30113	0.288257	0.999831	4542	145	1.16128	0.988103	1.36481	0.0695633	0.951571	4252	150	1.15952	0.970681	1.3851	0.1027	0.801521	4228	124	0.802
IQCD	seq.22481.15	0.839477	0.687268	1.0254	0.0864752	0.998072	4567	172	0.829175	0.66633	1.03182	0.0931099	0.999831	4542	145	0.850654	0.687787	1.05209	0.13577	0.998408	4252	150	0.823198	0.645509	1.0498	0.116821	0.801521	4228	124	0.802
NADK2	seq.22505.24	0.913647	0.789104	1.05785	0.227096	0.998072	4567	172	0.833153	0.690989	1.00457	0.0558414	0.999831	4542	145	0.945283	0.815633	1.09554	0.454676	0.998408	4252	150	0.865171	0.719498	1.04034	0.123654	0.801521	4228	124	0.802
PDHB	seq.22526.81	1.02491	0.828529	1.26784	0.820631	0.998072	4567	172	1.07441	0.859213	1.34351	0.529099	0.999831	4542	145	1.07304	0.856265	1.3447	0.540355	0.998408	4252	150	1.15547	0.917136	1.45573	0.22017	0.801968	4228	124	0.802
RAD51C	seq.22544.10	1.07675	0.851097	1.36224	0.537692	0.998072	4567	172	1.13442	0.882968	1.45747	0.323907	0.999831	4542	145	1.12809	0.882118	1.44264	0.336831	0.998408	4252	150	1.22761	0.947892	1.58986	0.120096	0.801521	4228	124	0.802
MRPL10	seq.22554.101	1.04992	0.773251	1.42558	0.754912	0.998072	4567	172	1.13801	0.824055	1.57158	0.432463	0.999831	4542	145	1.2081	0.88426	1.65054	0.235066	0.998408	4252	150	1.33207	0.970646	1.82806	0.0758136	0.801521	4228	124	0.802
EVI2A	seq.22560.1	1.07604	0.916357	1.26355	0.371202	0.998072	4567	172	1.09695	0.922861	1.30389	0.293936	0.999831	4542	145	1.11843	0.939081	1.33204	0.209421	0.998408	4252	150	1.134	0.939275	1.3691	0.190784	0.801968	4228	124	0.802
ROBO2	seq.22578.17	0.974417	0.782726	1.21305	0.816628	0.998072	4567	172	0.888627	0.703092	1.12312	0.323043	0.999831	4542	145	0.946857	0.733969	1.22149	0.674298	0.998408	4252	150	0.817732	0.623646	1.07222	0.145508	0.801968	4228	124	0.802
LRP6	seq.22584.2	0.856752	0.718839	1.02112	0.0842458	0.998072	4567	172	0.851333	0.698267	1.03795	0.111466	0.999831	4542	145	0.867054	0.723238	1.03947	0.123152	0.998408	4252	150	0.849173	0.687471	1.04891	0.129282	0.801521	4228	124	0.802
SAMD12	seq.22771.6	1.16494	1.00547	1.34971	0.042091	0.998072	4567	172	1.1228	0.959987	1.31323	0.147309	0.999831	4542	145	1.141	0.985171	1.32147	0.0783088	0.980121	4252	150	1.11055	0.947957	1.30103	0.194199	0.801968	4228	124	0.802
SAMM50	seq.22772.125	1.1398	0.971605	1.33712	0.10819	0.998072	4567	172	1.13112	0.942234	1.35787	0.186267	0.999831	4542	145	1.18241	1.01322	1.37985	0.0334417	0.879506	4252	150	1.17296	0.985175	1.39654	0.0730994	0.801521	4228	124	0.802
TIMP2	seq.2278.61	1.06056	0.881258	1.27634	0.533776	0.998072	4567	172	0.959608	0.793307	1.16077	0.671108	0.999831	4542	145	0.981243	0.79765	1.20709	0.857813	0.998408	4252	150	0.86912	0.70384	1.07321	0.192423	0.801968	4228	124	0.802
SPATA22	seq.22784.4	1.11017	0.954301	1.29151	0.175729	0.998072	4567	172	1.08572	0.912119	1.29237	0.354854	0.999831	4542	145	1.12763	0.959597	1.32508	0.144556	0.998408	4252	150	1.1239	0.938969	1.34526	0.202856	0.801968	4228	124	0.802
SPATA46	seq.22786.57	1.18568	1.00188	1.4032	0.0474912	0.998072	4567	172	1.20518	1.00392	1.44679	0.0452878	0.999831	4542	145	1.13397	0.947911	1.35654	0.169147	0.998408	4252	150	1.1487	0.943981	1.3978	0.166261	0.801968	4228	124	0.802
TADA2A	seq.22795.17	0.868443	0.73773	1.02232	0.0901109	0.998072	4567	172	0.852298	0.710266	1.02273	0.085738	0.999831	4542	145	0.869234	0.733082	1.03067	0.106877	0.998408	4252	150	0.843696	0.700206	1.01659	0.0739393	0.801521	4228	124	0.802
TCAP	seq.22800.24	0.89304	0.742942	1.07346	0.228234	0.998072	4567	172	0.878315	0.70995	1.08661	0.232088	0.999831	4542	145	0.900793	0.744863	1.08937	0.281316	0.998408	4252	150	0.862008	0.681625	1.09013	0.215119	0.801968	4228	124	0.802
BTN3A3	seq.22950.6	0.94872	0.800929	1.12378	0.542328	0.998072	4567	172	0.86351	0.709802	1.0505	0.142277	0.999831	4542	145	0.939093	0.793585	1.11128	0.464415	0.998408	4252	150	0.874703	0.726047	1.0538	0.158944	0.801968	4228	124	0.802
DSTN	seq.22958.6	0.963288	0.677359	1.36992	0.835093	0.998072	4567	172	1.1162	0.773342	1.61106	0.557106	0.999831	4542	145	1.05937	0.73533	1.52619	0.75687	0.998408	4252	150	1.26259	0.886288	1.79866	0.196561	0.801968	4228	124	0.802
VAMP2	seq.22963.3	0.876246	0.743512	1.03268	0.114948	0.998072	4567	172	0.902971	0.76333	1.06816	0.233744	0.999831	4542	145	0.834599	0.691877	1.00676	0.0588143	0.92785	4252	150	0.8765	0.729681	1.05286	0.15875	0.801968	4228	124	0.802
CXCL2	seq.22972.26	1.07646	0.907754	1.27651	0.396915	0.998072	4567	172	1.12931	0.942397	1.3533	0.187729	0.999831	4542	145	1.10428	0.928343	1.31356	0.262597	0.998408	4252	150	1.16433	0.968398	1.3999	0.105575	0.801521	4228	124	0.802
NLGN1	seq.23000.22	0.950149	0.804569	1.12207	0.546743	0.998072	4567	172	0.876983	0.726206	1.05907	0.172635	0.999831	4542	145	0.894253	0.746435	1.07134	0.225346	0.998408	4252	150	0.868997	0.697765	1.08225	0.209817	0.801968	4228	124	0.802
REG1B	seq.23018.4	1.14765	0.973331	1.35318	0.101337	0.998072	4567	172	1.16548	0.981928	1.38334	0.0798747	0.999831	4542	145	1.1278	0.941072	1.35158	0.192803	0.998408	4252	150	1.16817	0.966149	1.41243	0.108599	0.801521	4228	124	0.802
SORCS3	seq.23034.13	0.95179	0.782206	1.15814	0.621636	0.998072	4567	172	0.878901	0.713194	1.08311	0.225892	0.999831	4542	145	0.851289	0.670282	1.08118	0.186812	0.998408	4252	150	0.820556	0.626178	1.07527	0.15162	0.801968	4228	124	0.802
BIK	seq.23153.14	0.957191	0.798685	1.14715	0.63572	0.998072	4567	172	0.848662	0.679786	1.05949	0.147191	0.999831	4542	145	0.972024	0.807472	1.17011	0.764287	0.998408	4252	150	0.838756	0.671697	1.04736	0.120749	0.801521	4228	124	0.802
LTK	seq.23181.2	1.0716	0.930132	1.23459	0.338393	0.998072	4567	172	1.14916	0.999104	1.32175	0.0514819	0.999831	4542	145	1.05889	0.901016	1.24442	0.487292	0.998408	4252	150	1.14086	0.972051	1.33898	0.106737	0.801521	4228	124	0.802
ETV2	seq.23210.4	1.05665	0.886926	1.25886	0.537345	0.998072	4567	172	1.10254	0.923513	1.31628	0.280218	0.999831	4542	145	1.09958	0.929683	1.30053	0.267621	0.998408	4252	150	1.13663	0.956503	1.35068	0.145719	0.801968	4228	124	0.802
ATP5PB	seq.23226.42	1.01708	0.88122	1.17389	0.816899	0.998072	4567	172	1.01612	0.867856	1.1897	0.842516	0.999831	4542	145	1.11639	0.958455	1.30036	0.157136	0.998408	4252	150	1.11951	0.942659	1.32955	0.198137	0.801968	4228	124	0.802
TCEAL4	seq.23250.3	0.899141	0.717606	1.1266	0.355487	0.998072	4567	172	0.764498	0.564738	1.03492	0.0822309	0.999831	4542	145	0.831223	0.651045	1.06127	0.138081	0.998408	4252	150	0.747523	0.5316	1.05115	0.0942927	0.801521	4228	124	0.802
DNAJB3	seq.23252.4	1.1008	0.977919	1.23913	0.111773	0.998072	4567	172	1.09321	0.952075	1.25527	0.20636	0.999831	4542	145	1.11233	0.986944	1.25366	0.0810492	0.980121	4252	150	1.10325	0.959732	1.26824	0.166983	0.801968	4228	124	0.802
MED10	seq.23264.42	1.07329	0.75135	1.53316	0.697486	0.998072	4567	172	1.1116	0.780092	1.58397	0.55819	0.999831	4542	145	1.24235	0.894072	1.72631	0.196044	0.998408	4252	150	1.30517	0.957777	1.77857	0.0916464	0.801521	4228	124	0.802
MITD1	seq.23266.62	1.03707	0.757267	1.42026	0.820506	0.998072	4567	172	1.13777	0.82493	1.56925	0.431395	0.999831	4542	145	1.15354	0.846361	1.57222	0.365923	0.998408	4252	150	1.28008	0.94574	1.73262	0.109868	0.801521	4228	124	0.802
DPCD	seq.23272.8	0.963515	0.788496	1.17738	0.716302	0.998072	4567	172	1.06078	0.873366	1.28841	0.551923	0.999831	4542	145	1.03044	0.832479	1.27547	0.782955	0.998408	4252	150	1.14686	0.929476	1.41509	0.201269	0.801968	4228	124	0.802
SSPN	seq.23275.9	1.01861	0.766515	1.35362	0.898846	0.998072	4567	172	1.09797	0.810003	1.48831	0.547018	0.999831	4542	145	1.09782	0.83313	1.44659	0.507335	0.998408	4252	150	1.20803	0.896909	1.62708	0.213535	0.801968	4228	124	0.802
MRPL12	seq.23278.13	1.00525	0.743193	1.3597	0.972908	0.998072	4567	172	1.13183	0.820164	1.56194	0.451094	0.999831	4542	145	1.11912	0.806469	1.55299	0.500769	0.998408	4252	150	1.29717	0.926622	1.81591	0.129527	0.801521	4228	124	0.802
CEP112	seq.23292.1	0.821548	0.669365	1.00833	0.0600228	0.998072	4567	172	0.762335	0.566796	1.02533	0.0727238	0.999831	4542	145	0.791211	0.622666	1.00538	0.0553498	0.926196	4252	150	0.749118	0.53539	1.04817	0.0918913	0.801521	4228	124	0.802
CHAC1	seq.23293.15	0.936464	0.793641	1.10499	0.436854	0.998072	4567	172	0.944653	0.784633	1.13731	0.547655	0.999831	4542	145	0.846697	0.698063	1.02698	0.0910876	0.990082	4252	150	0.847397	0.679367	1.05699	0.141972	0.801968	4228	124	0.802
TPPP	seq.23299.52	0.93842	0.802092	1.09792	0.427435	0.998072	4567	172	0.912409	0.752895	1.10572	0.349803	0.999831	4542	145	0.898843	0.755221	1.06978	0.229894	0.998408	4252	150	0.864665	0.695656	1.07473	0.190034	0.801968	4228	124	0.802
RBPMS2	seq.23300.3	0.993654	0.73891	1.33622	0.966401	0.998072	4567	172	1.11745	0.81673	1.5289	0.487501	0.999831	4542	145	1.0767	0.789877	1.46767	0.640095	0.998408	4252	150	1.23946	0.911245	1.68589	0.171372	0.801968	4228	124	0.802
AKT1S1	seq.23302.19	1.03904	0.795742	1.35671	0.77845	0.998072	4567	172	1.10623	0.850508	1.43884	0.451609	0.999831	4542	145	1.07575	0.824767	1.4031	0.590117	0.998408	4252	150	1.19817	0.936692	1.53265	0.150054	0.801968	4228	124	0.802
TXNDC9	seq.23303.131	1.12128	0.92952	1.3526	0.231607	0.998072	4567	172	1.15571	0.938086	1.42383	0.17397	0.999831	4542	145	1.15881	0.949136	1.4148	0.147792	0.998408	4252	150	1.20612	0.971023	1.49814	0.0902313	0.801521	4228	124	0.802
NIPSNAP3B	seq.23304.1	1.08848	0.926147	1.27926	0.303532	0.998072	4567	172	1.08218	0.909831	1.28717	0.372228	0.999831	4542	145	1.13137	0.951323	1.34548	0.162802	0.998408	4252	150	1.14151	0.948631	1.3736	0.161052	0.801968	4228	124	0.802
TCF24	seq.23339.46	0.952278	0.78836	1.15028	0.61191	0.998072	4567	172	0.884891	0.693095	1.12976	0.326524	0.999831	4542	145	0.911796	0.73727	1.12764	0.3943	0.998408	4252	150	0.816353	0.611102	1.09054	0.16964	0.801968	4228	124	0.802
CCDC24	seq.23356.32	1.05946	0.91385	1.22827	0.443856	0.998072	4567	172	1.10047	0.940407	1.28777	0.232552	0.999831	4542	145	1.09221	0.943774	1.264	0.236599	0.998408	4252	150	1.14188	0.979091	1.33174	0.0908872	0.801521	4228	124	0.802
UBL7	seq.23366.15	0.944268	0.7122	1.25195	0.690262	0.998072	4567	172	1.07874	0.83922	1.38661	0.554076	0.999831	4542	145	1.0305	0.795784	1.33444	0.819787	0.998408	4252	150	1.18387	0.950504	1.47452	0.131858	0.801521	4228	124	0.802
DPH5	seq.23373.77	1.03673	0.898037	1.19684	0.622517	0.998072	4567	172	1.03437	0.88281	1.21196	0.675902	0.999831	4542	145	1.10151	0.961881	1.2614	0.162112	0.998408	4252	150	1.10171	0.94746	1.28108	0.208141	0.801968	4228	124	0.802
NECAB3	seq.23374.42	1.07328	0.935158	1.2318	0.314332	0.998072	4567	172	1.09872	0.956829	1.26165	0.18205	0.999831	4542	145	1.09074	0.951117	1.25085	0.213928	0.998408	4252	150	1.1223	0.979582	1.28581	0.0963697	0.801521	4228	124	0.802
SEPTIN1	seq.23381.8	1.04767	0.881012	1.24584	0.598337	0.998072	4567	172	1.03984	0.868903	1.24441	0.669829	0.999831	4542	145	1.14057	0.960057	1.35503	0.134579	0.998408	4252	150	1.12923	0.94334	1.35175	0.185374	0.801968	4228	124	0.802
TIPRL	seq.23387.18	0.924254	0.688257	1.24117	0.60052	0.998072	4567	172	1.12302	0.835506	1.50948	0.441934	0.999831	4542	145	0.982766	0.714822	1.35115	0.914761	0.998408	4252	150	1.22014	0.895455	1.66255	0.207503	0.801968	4228	124	0.802
FAHD2A	seq.23389.28	1.01404	0.816707	1.25905	0.899516	0.998072	4567	172	1.11962	0.90299	1.38823	0.30306	0.999831	4542	145	1.06047	0.845397	1.33027	0.611645	0.998408	4252	150	1.19114	0.952334	1.48982	0.125481	0.801521	4228	124	0.802
RASSF5	seq.23406.3	0.811455	0.647903	1.01629	0.0688691	0.998072	4567	172	0.827	0.653801	1.04608	0.113135	0.999831	4542	145	0.852957	0.682221	1.06642	0.162813	0.998408	4252	150	0.858634	0.67635	1.09005	0.21063	0.801968	4228	124	0.802
OLAH	seq.23407.9	1.06554	0.903083	1.25721	0.451968	0.998072	4567	172	1.08342	0.90723	1.29382	0.376256	0.999831	4542	145	1.14203	0.966393	1.3496	0.11905	0.998408	4252	150	1.15491	0.967241	1.37899	0.111418	0.801521	4228	124	0.802
EIF3M	seq.23410.46	0.893132	0.660615	1.20749	0.462596	0.998072	4567	172	1.05652	0.781286	1.42871	0.721037	0.999831	4542	145	1.01156	0.743137	1.37694	0.941759	0.998408	4252	150	1.21836	0.899723	1.64984	0.201652	0.801968	4228	124	0.802
ANKRD45	seq.23413.38	1.12405	0.969827	1.3028	0.1204	0.998072	4567	172	1.14437	0.969141	1.35128	0.111759	0.999831	4542	145	1.10186	0.935082	1.29839	0.246691	0.998408	4252	150	1.13098	0.937835	1.36389	0.197661	0.801968	4228	124	0.802
SNX15	seq.23416.47	1.00008	0.798484	1.25256	0.999478	0.999657	4567	172	1.16975	0.94134	1.45359	0.157187	0.999831	4542	145	1.04732	0.81742	1.34188	0.714636	0.998408	4252	150	1.24253	0.974847	1.58371	0.0793955	0.801521	4228	124	0.802
NME7	seq.23521.29	0.962402	0.690749	1.34089	0.820831	0.998072	4567	172	1.14501	0.81279	1.61303	0.438643	0.999831	4542	145	1.05635	0.741928	1.50401	0.761065	0.998408	4252	150	1.3096	0.936314	1.8317	0.115119	0.801521	4228	124	0.802
PHYHIPL	seq.23528.199	1.05999	0.897316	1.25215	0.493118	0.998072	4567	172	1.08719	0.913476	1.29394	0.346621	0.999831	4542	145	1.11502	0.947266	1.31248	0.190617	0.998408	4252	150	1.13374	0.950773	1.35192	0.162159	0.801968	4228	124	0.802
TRUB1	seq.23543.92	1.01891	0.781641	1.3282	0.889839	0.998072	4567	172	1.11634	0.872792	1.42785	0.38078	0.999831	4542	145	1.11397	0.865666	1.43349	0.401564	0.998408	4252	150	1.20786	0.961334	1.5176	0.104925	0.801521	4228	124	0.802
HAGHL	seq.23546.9	0.848618	0.710123	1.01413	0.0709648	0.998072	4567	172	0.856918	0.707148	1.03841	0.115153	0.999831	4542	145	0.813677	0.649262	1.01973	0.0733926	0.967287	4252	150	0.82518	0.644494	1.05652	0.127522	0.801521	4228	124	0.802
TADA3	seq.23551.15	1.17983	1.00738	1.38179	0.0402427	0.998072	4567	172	1.13803	0.955321	1.35568	0.147592	0.999831	4542	145	1.19459	1.03091	1.38426	0.0180382	0.857608	4252	150	1.1619	0.98605	1.36911	0.0730994	0.801521	4228	124	0.802
VGLL4	seq.23556.4	0.920905	0.784509	1.08101	0.313692	0.998072	4567	172	0.863785	0.70627	1.05643	0.153994	0.999831	4542	145	0.904589	0.752172	1.08789	0.286801	0.998408	4252	150	0.855747	0.681758	1.07414	0.179179	0.801968	4228	124	0.802
METTL2B	seq.23558.33	0.932132	0.790362	1.09933	0.403756	0.998072	4567	172	0.887269	0.743007	1.05954	0.186448	0.999831	4542	145	0.935989	0.783668	1.11792	0.465406	0.998408	4252	150	0.883521	0.729868	1.06952	0.203914	0.801968	4228	124	0.802
MEIS2	seq.23568.41	1.04512	0.796882	1.37067	0.749772	0.998072	4567	172	1.09859	0.819826	1.47214	0.528923	0.999831	4542	145	1.09499	0.823965	1.45517	0.531664	0.998408	4252	150	1.2172	0.906114	1.63509	0.191796	0.801968	4228	124	0.802
TYW3	seq.23572.186	0.906778	0.739806	1.11144	0.345954	0.998072	4567	172	0.828388	0.633514	1.08321	0.168852	0.999831	4542	145	0.844179	0.655378	1.08737	0.189696	0.998408	4252	150	0.767255	0.549643	1.07102	0.119516	0.801521	4228	124	0.802
COX19	seq.23575.58	1.00039	0.737738	1.35654	0.998016	0.999657	4567	172	1.10309	0.812399	1.49779	0.529551	0.999831	4542	145	1.11909	0.819642	1.52794	0.478829	0.998408	4252	150	1.2623	0.937469	1.69969	0.124883	0.801521	4228	124	0.802
CTAG1A	seq.23586.32	0.905145	0.762571	1.07437	0.254431	0.998072	4567	172	0.865473	0.698165	1.07287	0.187432	0.999831	4542	145	0.860016	0.693324	1.06679	0.170102	0.998408	4252	150	0.842228	0.644389	1.10081	0.20878	0.801968	4228	124	0.802
HSDL2	seq.23588.9	0.866861	0.715738	1.04989	0.143783	0.998072	4567	172	0.860718	0.698623	1.06042	0.158864	0.999831	4542	145	0.847595	0.689687	1.04166	0.115953	0.998408	4252	150	0.843224	0.673517	1.05569	0.136938	0.801521	4228	124	0.802
MB21D2	seq.23593.14	1.05829	0.927676	1.20729	0.399246	0.998072	4567	172	1.07645	0.934804	1.23956	0.306117	0.999831	4542	145	1.07896	0.946839	1.22951	0.254154	0.998408	4252	150	1.10701	0.962674	1.27299	0.153782	0.801968	4228	124	0.802
NR2C2AP	seq.23594.2	0.872459	0.726213	1.04816	0.144965	0.998072	4567	172	0.890715	0.733583	1.0815	0.242511	0.999831	4542	145	0.847391	0.693589	1.0353	0.105119	0.998408	4252	150	0.874975	0.708662	1.08032	0.214337	0.801968	4228	124	0.802
SAMD4B	seq.23606.18	1.02688	0.800027	1.31806	0.835025	0.998072	4567	172	1.10128	0.859244	1.41148	0.446125	0.999831	4542	145	1.08679	0.851781	1.38664	0.503167	0.998408	4252	150	1.1739	0.933105	1.47684	0.171038	0.801968	4228	124	0.802
PADI1	seq.23616.4	1.11328	0.943298	1.31389	0.204279	0.998072	4567	172	1.08201	0.891403	1.31337	0.425316	0.999831	4542	145	1.21923	1.00283	1.48234	0.0467762	0.92329	4252	150	1.18828	0.948935	1.488	0.132773	0.801521	4228	124	0.802
HYPK	seq.23617.15	1.09713	0.93919	1.28164	0.24244	0.998072	4567	172	1.05648	0.881258	1.26655	0.552622	0.999831	4542	145	1.15519	0.995751	1.34016	0.0569355	0.926638	4252	150	1.11641	0.936407	1.33101	0.219623	0.801968	4228	124	0.802
ZNF593	seq.23618.23	0.841305	0.702377	1.00771	0.0605776	0.998072	4567	172	0.869855	0.720026	1.05086	0.148279	0.999831	4542	145	0.848489	0.702635	1.02462	0.0877714	0.983043	4252	150	0.869508	0.709307	1.06589	0.178362	0.801968	4228	124	0.802
HSD17B4	seq.23643.22	1.01136	0.747282	1.36875	0.941683	0.998072	4567	172	1.04941	0.755512	1.45763	0.773605	0.999831	4542	145	1.18637	0.862553	1.63176	0.293331	0.998408	4252	150	1.25805	0.898838	1.76081	0.180813	0.801968	4228	124	0.802
DMTN	seq.23650.2	1.07737	0.894492	1.29763	0.432341	0.998072	4567	172	1.09965	0.910622	1.32793	0.323589	0.999831	4542	145	1.15257	0.961627	1.38144	0.124395	0.998408	4252	150	1.17553	0.974756	1.41766	0.0905657	0.801521	4228	124	0.802
PIPOX	seq.23652.15	0.797784	0.633378	1.00486	0.0550118	0.998072	4567	172	0.823881	0.642057	1.0572	0.127809	0.999831	4542	145	0.761014	0.58092	0.996939	0.0474514	0.92329	4252	150	0.767073	0.561553	1.04781	0.095615	0.801521	4228	124	0.802
ALG2	seq.23654.6	1.11492	0.918422	1.35346	0.271455	0.998072	4567	172	1.11145	0.901573	1.37019	0.322365	0.999831	4542	145	1.18781	0.948381	1.48769	0.133992	0.998408	4252	150	1.19294	0.93242	1.52625	0.160502	0.801968	4228	124	0.802
NARS2	seq.23658.1	0.853397	0.715062	1.01849	0.0789329	0.998072	4567	172	0.865762	0.713173	1.051	0.145068	0.999831	4542	145	0.863407	0.719727	1.03577	0.113752	0.998408	4252	150	0.866475	0.701469	1.0703	0.183612	0.801968	4228	124	0.802
BZW2	seq.23659.2	0.962684	0.709758	1.30574	0.806807	0.998072	4567	172	1.12012	0.803232	1.56204	0.503753	0.999831	4542	145	1.0525	0.755112	1.46701	0.762636	0.998408	4252	150	1.26647	0.895086	1.79196	0.182176	0.801968	4228	124	0.802
XPNPEP3	seq.23661.61	0.877774	0.744117	1.03544	0.121909	0.998072	4567	172	0.844772	0.689865	1.03446	0.102642	0.999831	4542	145	0.872227	0.729082	1.04348	0.134997	0.998408	4252	150	0.834249	0.66433	1.04763	0.118859	0.801521	4228	124	0.802
RTKN	seq.23664.17	1.11364	0.985752	1.25812	0.0837337	0.998072	4567	172	1.09892	0.960752	1.25696	0.168833	0.999831	4542	145	1.13021	0.999303	1.27827	0.0513071	0.926196	4252	150	1.10688	0.962351	1.27312	0.154898	0.801968	4228	124	0.802
ATIC	seq.23666.35	0.968713	0.715854	1.31089	0.836818	0.998072	4567	172	1.12772	0.834812	1.52339	0.433432	0.999831	4542	145	1.05091	0.758269	1.4565	0.765539	0.998408	4252	150	1.25867	0.918653	1.72453	0.152173	0.801968	4228	124	0.802
DPH2	seq.23670.11	1.06943	0.912748	1.25301	0.406261	0.998072	4567	172	1.08873	0.923339	1.28374	0.311906	0.999831	4542	145	1.11633	0.940884	1.32449	0.207135	0.998408	4252	150	1.13789	0.952713	1.35905	0.154031	0.801968	4228	124	0.802
SPDL1	seq.23671.11	0.868992	0.730628	1.03356	0.112521	0.998072	4567	172	0.861591	0.70426	1.05407	0.147582	0.999831	4542	145	0.873159	0.724332	1.05256	0.154833	0.998408	4252	150	0.862435	0.688764	1.0799	0.197049	0.801968	4228	124	0.802
SOX10	seq.23678.132	0.866448	0.729655	1.02889	0.102016	0.998072	4567	172	0.89501	0.752514	1.06449	0.209968	0.999831	4542	145	0.821007	0.678794	0.993016	0.0421313	0.92329	4252	150	0.838079	0.685612	1.02445	0.0846724	0.801521	4228	124	0.802
HENMT1	seq.23682.79	1.0755	0.935378	1.23662	0.306772	0.998072	4567	172	1.0955	0.939924	1.27682	0.243141	0.999831	4542	145	1.07234	0.923539	1.24512	0.359468	0.998408	4252	150	1.10584	0.942589	1.29737	0.217014	0.801968	4228	124	0.802
CPNE6	seq.23689.52	1.04924	0.91886	1.19811	0.477722	0.998072	4567	172	1.0614	0.915619	1.2304	0.429207	0.999831	4542	145	1.08772	0.949178	1.24649	0.226414	0.998408	4252	150	1.11318	0.961189	1.2892	0.152284	0.801968	4228	124	0.802
TTLL12	seq.23691.2	0.924035	0.759699	1.12392	0.429093	0.998072	4567	172	1.01332	0.839575	1.22303	0.890313	0.999831	4542	145	1.0273	0.853708	1.23618	0.775524	0.998408	4252	150	1.13309	0.941813	1.36321	0.185335	0.801968	4228	124	0.802
TRMT6	seq.23696.256	1.12869	0.941845	1.35261	0.189823	0.998072	4567	172	1.1624	0.958442	1.40975	0.126318	0.999831	4542	145	1.1527	0.944674	1.40653	0.16167	0.998408	4252	150	1.18466	0.95567	1.46851	0.122043	0.801521	4228	124	0.802
VSIG10L	seq.24011.27	0.932602	0.799845	1.08739	0.373134	0.998072	4567	172	0.925479	0.774225	1.10628	0.394988	0.999831	4542	145	0.902226	0.760552	1.07029	0.237776	0.998408	4252	150	0.877908	0.714599	1.07854	0.214976	0.801968	4228	124	0.802
GSK3B	seq.24050.26	0.926795	0.66849	1.28491	0.648339	0.998072	4567	172	1.08154	0.759759	1.5396	0.663532	0.999831	4542	145	1.03274	0.729037	1.46295	0.856138	0.998408	4252	150	1.24927	0.876825	1.77991	0.217867	0.801968	4228	124	0.802
HMGCL	seq.24211.25	1.02164	0.778978	1.33988	0.877047	0.998072	4567	172	1.11117	0.832706	1.48274	0.47389	0.999831	4542	145	1.1345	0.85259	1.50962	0.386592	0.998408	4252	150	1.27476	0.948629	1.71302	0.107355	0.801521	4228	124	0.802
VAT1L	seq.24236.46	1.05301	0.888116	1.24853	0.552186	0.998072	4567	172	0.974131	0.782236	1.2131	0.814866	0.999831	4542	145	0.914117	0.747965	1.11718	0.380286	0.998408	4252	150	0.840942	0.642871	1.10004	0.20616	0.801968	4228	124	0.802
RILP	seq.24244.81	1.01649	0.834078	1.23879	0.871261	0.998072	4567	172	1.1169	0.917956	1.35896	0.269312	0.999831	4542	145	1.08445	0.873169	1.34686	0.463379	0.998408	4252	150	1.22151	0.980323	1.52204	0.0745996	0.801521	4228	124	0.802
EPN1	seq.24255.38	0.995825	0.694268	1.42837	0.981865	0.998072	4567	172	1.15187	0.791793	1.67571	0.459721	0.999831	4542	145	1.16005	0.780851	1.72339	0.462267	0.998408	4252	150	1.38353	0.948449	2.0182	0.0919409	0.801521	4228	124	0.802
SETD3	seq.24260.4	1.05878	0.795582	1.40905	0.695273	0.998072	4567	172	1.1866	0.879339	1.60123	0.263136	0.999831	4542	145	1.1237	0.830858	1.51975	0.44899	0.998408	4252	150	1.29359	0.957221	1.74817	0.0938479	0.801521	4228	124	0.802
DAPK3	seq.24261.202	1.12121	0.876161	1.4348	0.363203	0.998072	4567	172	1.17354	0.908149	1.51648	0.221175	0.999831	4542	145	1.13537	0.893579	1.44259	0.298763	0.998408	4252	150	1.23424	0.969958	1.57053	0.0869174	0.801521	4228	124	0.802
NME8	seq.24273.43	1.04242	0.887386	1.22455	0.613043	0.998072	4567	172	1.08765	0.91934	1.28678	0.327305	0.999831	4542	145	1.04635	0.882662	1.2404	0.601646	0.998408	4252	150	1.11237	0.939739	1.31672	0.215842	0.801968	4228	124	0.802
LSMEM1	seq.24289.1	0.935059	0.783343	1.11616	0.457262	0.998072	4567	172	0.875873	0.724611	1.05871	0.170632	0.999831	4542	145	0.89094	0.720259	1.10207	0.287201	0.998408	4252	150	0.825382	0.65723	1.03656	0.0987188	0.801521	4228	124	0.802
SYTL2	seq.24309.14	0.883087	0.742035	1.05095	0.161422	0.998072	4567	172	0.853761	0.695105	1.04863	0.131733	0.999831	4542	145	0.833944	0.668131	1.04091	0.108378	0.998408	4252	150	0.795	0.606671	1.04179	0.0962763	0.801521	4228	124	0.802
NARF	seq.24321.67	0.962901	0.799184	1.16016	0.690924	0.998072	4567	172	0.863218	0.708214	1.05215	0.145223	0.999831	4542	145	0.901787	0.724676	1.12218	0.354101	0.998408	4252	150	0.826948	0.654947	1.04412	0.110243	0.801521	4228	124	0.802
GTF2E1	seq.24322.1	1.11044	0.961113	1.28298	0.155108	0.998072	4567	172	1.1186	0.958604	1.30531	0.154685	0.999831	4542	145	1.10766	0.949198	1.29257	0.194259	0.998408	4252	150	1.13366	0.960893	1.3375	0.136984	0.801521	4228	124	0.802
MBNL1	seq.24408.30	0.999461	0.724932	1.37795	0.997373	0.999293	4567	172	1.15453	0.822412	1.62077	0.406377	0.999831	4542	145	1.11311	0.796683	1.55522	0.530016	0.998408	4252	150	1.35091	0.973281	1.87506	0.0721612	0.801521	4228	124	0.802
PYGB	seq.24414.3	0.945551	0.710442	1.25847	0.701093	0.998072	4567	172	1.07679	0.7849	1.47722	0.646511	0.999831	4542	145	1.06651	0.778381	1.4613	0.688602	0.998408	4252	150	1.26611	0.909911	1.76175	0.161551	0.801968	4228	124	0.802
SND1	seq.24416.20	1.08483	0.949705	1.23919	0.230255	0.998072	4567	172	1.09439	0.94319	1.26982	0.234446	0.999831	4542	145	1.0845	0.937537	1.25449	0.274905	0.998408	4252	150	1.10663	0.942846	1.29887	0.215031	0.801968	4228	124	0.802
MOCOS	seq.24419.3	0.940086	0.78751	1.12222	0.494109	0.998072	4567	172	0.887694	0.728899	1.08108	0.236141	0.999831	4542	145	0.877416	0.735015	1.04741	0.147789	0.998408	4252	150	0.874326	0.711905	1.0738	0.200238	0.801968	4228	124	0.802
MARS1	seq.24425.8	0.964425	0.722253	1.2878	0.806046	0.998072	4567	172	1.1248	0.820889	1.54123	0.464267	0.999831	4542	145	1.06908	0.783667	1.45844	0.673349	0.998408	4252	150	1.29806	0.940499	1.79156	0.112547	0.801521	4228	124	0.802
CTNNA1	seq.24426.191	1.11486	0.944381	1.31611	0.199097	0.998072	4567	172	1.13777	0.960087	1.34834	0.136264	0.999831	4542	145	1.12478	0.948257	1.33416	0.177012	0.998408	4252	150	1.16288	0.979234	1.38096	0.0853039	0.801521	4228	124	0.802
GRIPAP1	seq.24432.3	0.981177	0.713325	1.34961	0.907002	0.998072	4567	172	1.10812	0.782828	1.5686	0.562546	0.999831	4542	145	1.09929	0.786726	1.53602	0.579167	0.998408	4252	150	1.28303	0.906677	1.81561	0.159445	0.801968	4228	124	0.802
DLGAP4	seq.24436.23	1.01128	0.761086	1.34371	0.938359	0.998072	4567	172	1.1425	0.861448	1.51524	0.355107	0.999831	4542	145	1.05798	0.792992	1.41151	0.701607	0.998408	4252	150	1.19836	0.906752	1.58374	0.203396	0.801968	4228	124	0.802
AFAP1L2	seq.24445.38	0.995221	0.771912	1.28313	0.970523	0.998072	4567	172	1.00797	0.766655	1.32524	0.954664	0.999831	4542	145	1.12472	0.882698	1.43309	0.341751	0.998408	4252	150	1.16772	0.912574	1.4942	0.217694	0.801968	4228	124	0.802
MBNL2	seq.24446.65	1.00355	0.726857	1.38557	0.982823	0.998072	4567	172	1.15561	0.819304	1.62995	0.409821	0.999831	4542	145	1.12657	0.808453	1.56985	0.481453	0.998408	4252	150	1.33843	0.958859	1.86824	0.0866942	0.801521	4228	124	0.802
C19orf54	seq.24450.96	0.854523	0.733482	0.995539	0.0436561	0.998072	4567	172	0.863139	0.729367	1.02145	0.0867066	0.999831	4542	145	0.860228	0.738132	1.00252	0.0538829	0.926196	4252	150	0.885204	0.747961	1.04763	0.156001	0.801968	4228	124	0.802
HCCS	seq.24453.75	0.916731	0.79364	1.05891	0.237262	0.998072	4567	172	0.914428	0.782432	1.06869	0.260712	0.999831	4542	145	0.877382	0.740142	1.04007	0.131733	0.998408	4252	150	0.888299	0.743715	1.06099	0.191274	0.801968	4228	124	0.802
COPB2	seq.24459.15	0.982219	0.725694	1.32942	0.907516	0.998072	4567	172	1.13235	0.814415	1.57441	0.459796	0.999831	4542	145	1.08932	0.788281	1.50534	0.604154	0.998408	4252	150	1.31507	0.936364	1.84693	0.113979	0.801521	4228	124	0.802
ADD2	seq.24468.36	1.0217	0.732402	1.42528	0.899407	0.998072	4567	172	1.05254	0.809298	1.36889	0.702529	0.999831	4542	145	1.14653	0.829172	1.58535	0.408225	0.998408	4252	150	1.17512	0.910684	1.51634	0.214724	0.801968	4228	124	0.802
PCBP3	seq.24470.20	1.1115	0.904888	1.3653	0.313697	0.998072	4567	172	1.14954	0.930006	1.42089	0.197437	0.999831	4542	145	1.14164	0.931597	1.39903	0.201617	0.998408	4252	150	1.17461	0.953704	1.44669	0.130011	0.801521	4228	124	0.802
SHARPIN	seq.24472.28	1.06469	0.796208	1.42371	0.672424	0.998072	4567	172	1.15216	0.852202	1.5577	0.357279	0.999831	4542	145	1.179	0.885058	1.57056	0.260397	0.998408	4252	150	1.28459	0.973057	1.69586	0.0771837	0.801521	4228	124	0.802
PLA2G5	seq.2449.1	1.04346	0.905062	1.20302	0.557884	0.998072	4567	172	1.00511	0.862846	1.17082	0.94783	0.999831	4542	145	0.958319	0.803399	1.14311	0.636038	0.998408	4252	150	0.872687	0.718599	1.05981	0.169475	0.801968	4228	124	0.802
LGSN	seq.24499.36	1.07637	0.895802	1.29333	0.432163	0.998072	4567	172	1.07822	0.869514	1.33701	0.49264	0.999831	4542	145	1.12273	0.939242	1.34206	0.203548	0.998408	4252	150	1.15169	0.943223	1.40623	0.165671	0.801968	4228	124	0.802
APOBEC2	seq.24647.3	1.18364	0.994507	1.40875	0.0576976	0.998072	4567	172	1.20742	0.998404	1.4602	0.0519518	0.999831	4542	145	1.12976	0.929754	1.37279	0.219707	0.998408	4252	150	1.17326	0.951454	1.44677	0.135037	0.801521	4228	124	0.802
SLBP	seq.24648.8	1.04412	0.76115	1.4323	0.788908	0.998072	4567	172	1.10138	0.827229	1.46639	0.508471	0.999831	4542	145	1.00922	0.736289	1.38333	0.954497	0.998408	4252	150	1.20099	0.900617	1.60155	0.212328	0.801968	4228	124	0.802
RILPL2	seq.24655.23	0.979042	0.733535	1.30672	0.885663	0.998072	4567	172	1.12435	0.827707	1.52732	0.453258	0.999831	4542	145	1.04611	0.773604	1.41461	0.76968	0.998408	4252	150	1.22747	0.905995	1.66301	0.185894	0.801968	4228	124	0.802
REM1	seq.24665.48	0.917316	0.788123	1.06769	0.265134	0.998072	4567	172	0.877725	0.732457	1.0518	0.157699	0.999831	4542	145	0.854516	0.708021	1.03132	0.101303	0.998408	4252	150	0.824743	0.655543	1.03761	0.100009	0.801521	4228	124	0.802
PIH1D1	seq.24670.1	0.91666	0.668678	1.25661	0.588711	0.998072	4567	172	1.08827	0.786473	1.50587	0.609731	0.999831	4542	145	1.01992	0.738641	1.40832	0.904627	0.998408	4252	150	1.23528	0.90143	1.69277	0.188698	0.801968	4228	124	0.802
CCL20	seq.2468.62	0.904149	0.766436	1.06661	0.232027	0.998072	4567	172	0.912752	0.781549	1.06598	0.24891	0.999831	4542	145	0.888365	0.730625	1.08016	0.235282	0.998408	4252	150	0.881908	0.728261	1.06797	0.198201	0.801968	4228	124	0.802
PSPH	seq.24681.2	1.12962	0.93265	1.36818	0.212492	0.998072	4567	172	1.1069	0.892279	1.37314	0.355714	0.999831	4542	145	1.17133	0.962526	1.42542	0.114404	0.998408	4252	150	1.17548	0.944412	1.46308	0.147665	0.801968	4228	124	0.802
SNX11	seq.24685.12	0.945874	0.704872	1.26928	0.710747	0.998072	4567	172	1.12925	0.851578	1.49747	0.398555	0.999831	4542	145	1.02231	0.758709	1.3775	0.884685	0.998408	4252	150	1.23919	0.938696	1.63587	0.130148	0.801521	4228	124	0.802
ACBD4	seq.24686.19	1.05592	0.882202	1.26384	0.552963	0.998072	4567	172	1.11195	0.926845	1.33402	0.253354	0.999831	4542	145	1.08973	0.90002	1.31943	0.378558	0.998408	4252	150	1.15282	0.946202	1.40456	0.158174	0.801968	4228	124	0.802
TTPAL	seq.24687.18	0.957293	0.738152	1.24149	0.742099	0.998072	4567	172	1.10834	0.854101	1.43827	0.439078	0.999831	4542	145	1.02796	0.788812	1.3396	0.838285	0.998408	4252	150	1.21406	0.936037	1.57467	0.143784	0.801968	4228	124	0.802
CFDP1	seq.24706.73	1.07562	0.890729	1.29889	0.448737	0.998072	4567	172	1.1377	0.948329	1.36488	0.164882	0.999831	4542	145	1.06358	0.850265	1.33042	0.589373	0.998408	4252	150	1.14813	0.924149	1.42639	0.212191	0.801968	4228	124	0.802
PTPA	seq.24717.26	1.01949	0.759011	1.36937	0.897951	0.998072	4567	172	1.19519	0.89388	1.59808	0.228946	0.999831	4542	145	1.10004	0.798268	1.51591	0.560015	0.998408	4252	150	1.31903	0.969163	1.79521	0.078269	0.801521	4228	124	0.802
ANKRD16	seq.24720.10	1.09077	0.861987	1.38028	0.469416	0.998072	4567	172	1.08518	0.856444	1.37501	0.49848	0.999831	4542	145	1.17935	0.922656	1.50746	0.187764	0.998408	4252	150	1.19011	0.922034	1.53613	0.181348	0.801968	4228	124	0.802
TIMP3	seq.2480.58	1.06581	0.872178	1.30244	0.533239	0.998072	4567	172	1.10263	0.887131	1.37047	0.37856	0.999831	4542	145	1.10889	0.892123	1.37833	0.35166	0.998408	4252	150	1.18764	0.935294	1.50808	0.158215	0.801968	4228	124	0.802
SHCBP1L	seq.24892.8	1.10908	0.957704	1.28437	0.166736	0.998072	4567	172	1.10204	0.940384	1.29149	0.229929	0.999831	4542	145	1.15157	0.994413	1.33356	0.0594078	0.929439	4252	150	1.13432	0.969562	1.32708	0.115493	0.801521	4228	124	0.802
VPS9D1	seq.24900.46	0.889815	0.732812	1.08046	0.23852	0.998072	4567	172	0.822212	0.643657	1.0503	0.117082	0.999831	4542	145	0.918714	0.751531	1.12309	0.408081	0.998408	4252	150	0.85453	0.667805	1.09347	0.211411	0.801968	4228	124	0.802
GLS	seq.24920.6	1.04426	0.808021	1.34957	0.740673	0.998072	4567	172	1.11455	0.869133	1.42926	0.392738	0.999831	4542	145	1.11829	0.856642	1.45985	0.411	0.998408	4252	150	1.2041	0.938563	1.54477	0.143965	0.801968	4228	124	0.802
SCRN3	seq.24923.27	0.990647	0.818177	1.19947	0.92329	0.998072	4567	172	1.02605	0.841378	1.25125	0.799487	0.999831	4542	145	1.07072	0.920765	1.2451	0.374729	0.998408	4252	150	1.11079	0.94826	1.30118	0.192988	0.801968	4228	124	0.802
FOXP1	seq.24935.62	1.14073	0.959529	1.35615	0.135727	0.998072	4567	172	1.10869	0.911786	1.34811	0.301017	0.999831	4542	145	1.17562	0.995095	1.38891	0.0571459	0.926638	4252	150	1.1368	0.936043	1.38061	0.195901	0.801968	4228	124	0.802
AP2B1	seq.24938.7	0.985364	0.686846	1.41362	0.936177	0.998072	4567	172	1.16778	0.810652	1.68224	0.40493	0.999831	4542	145	1.08701	0.748447	1.57873	0.661247	0.998408	4252	150	1.32196	0.926931	1.88535	0.1233	0.801521	4228	124	0.802
IKBKB	seq.24940.3	1.05698	0.81077	1.37797	0.682099	0.998072	4567	172	1.05698	0.807509	1.38352	0.686618	0.999831	4542	145	1.20364	0.944783	1.53342	0.13355	0.998408	4252	150	1.20607	0.937431	1.55171	0.144999	0.801968	4228	124	0.802
VAC14	seq.24951.3	1.08212	0.930189	1.25886	0.306576	0.998072	4567	172	1.0761	0.907679	1.27577	0.398344	0.999831	4542	145	1.15275	1.00122	1.3272	0.0480419	0.92329	4252	150	1.14851	0.981479	1.34397	0.0841933	0.801521	4228	124	0.802
FUBP3	seq.24952.28	0.982451	0.747293	1.29161	0.89907	0.998072	4567	172	1.09353	0.841706	1.42068	0.503155	0.999831	4542	145	1.07285	0.823969	1.39691	0.601543	0.998408	4252	150	1.18519	0.92397	1.52027	0.181056	0.801968	4228	124	0.802
RFX5	seq.24958.3	0.959452	0.809215	1.13758	0.633788	0.998072	4567	172	0.920075	0.7679	1.10241	0.366496	0.999831	4542	145	0.929068	0.764021	1.12977	0.460947	0.998408	4252	150	0.869584	0.699702	1.08071	0.20764	0.801968	4228	124	0.802
HIP1R	seq.24960.48	0.882264	0.732848	1.06214	0.185779	0.998072	4567	172	0.928731	0.781342	1.10392	0.401695	0.999831	4542	145	0.842319	0.686588	1.03337	0.0999189	0.998408	4252	150	0.875654	0.716621	1.06998	0.194108	0.801968	4228	124	0.802
VCP	seq.25033.194	0.944087	0.703006	1.26784	0.702115	0.998072	4567	172	1.13113	0.832471	1.53693	0.430847	0.999831	4542	145	1.03504	0.74865	1.43098	0.834934	0.998408	4252	150	1.26895	0.912804	1.76405	0.156431	0.801968	4228	124	0.802
DNPEP	seq.25037.4	1.08759	0.940208	1.25807	0.258422	0.998072	4567	172	1.13471	0.977976	1.31656	0.0956427	0.999831	4542	145	1.09854	0.940271	1.28344	0.236394	0.998408	4252	150	1.14609	0.980011	1.34032	0.0877846	0.801521	4228	124	0.802
TPP2	seq.25050.82	1.01604	0.848466	1.21672	0.862584	0.998072	4567	172	1.09167	0.901076	1.32257	0.370291	0.999831	4542	145	1.08262	0.910638	1.28709	0.368428	0.998408	4252	150	1.16117	0.966783	1.39463	0.109911	0.801521	4228	124	0.802
PRPF19	seq.25054.15	0.854198	0.706594	1.03263	0.103481	0.998072	4567	172	0.870208	0.729633	1.03787	0.121976	0.999831	4542	145	0.857253	0.702483	1.04612	0.129483	0.998408	4252	150	0.877194	0.728009	1.05695	0.168313	0.801968	4228	124	0.802
OSBP	seq.25055.56	0.975069	0.718427	1.32339	0.871301	0.998072	4567	172	1.07759	0.775001	1.49833	0.656787	0.999831	4542	145	1.08411	0.791607	1.48468	0.614706	0.998408	4252	150	1.22963	0.88871	1.70133	0.212105	0.801968	4228	124	0.802
ME1	seq.25060.18	1.14592	0.977857	1.34288	0.092321	0.998072	4567	172	1.12529	0.949957	1.33298	0.171963	0.999831	4542	145	1.14751	0.945791	1.39226	0.163026	0.998408	4252	150	1.14129	0.926753	1.40548	0.213509	0.801968	4228	124	0.802
GYG2	seq.25066.32	0.920374	0.772459	1.09661	0.353273	0.998072	4567	172	0.8644	0.704096	1.0612	0.163802	0.999831	4542	145	0.906012	0.733037	1.1198	0.361161	0.998408	4252	150	0.827049	0.634643	1.07779	0.159862	0.801968	4228	124	0.802
ASPSCR1	seq.25085.37	1.00216	0.755798	1.32882	0.988056	0.998072	4567	172	1.10867	0.840112	1.46308	0.466032	0.999831	4542	145	1.06014	0.785585	1.43065	0.702542	0.998408	4252	150	1.19883	0.901694	1.59388	0.212063	0.801968	4228	124	0.802
TFCP2L1	seq.25104.10	0.927701	0.67784	1.26966	0.639254	0.998072	4567	172	1.08978	0.782981	1.51679	0.610275	0.999831	4542	145	1.02991	0.739673	1.43402	0.861488	0.998408	4252	150	1.24674	0.895545	1.73567	0.1914	0.801968	4228	124	0.802
RPS6KB2	seq.25112.6	1.02974	0.874472	1.21258	0.725255	0.998072	4567	172	0.920696	0.730216	1.16087	0.484759	0.999831	4542	145	0.967975	0.811317	1.15488	0.717833	0.998408	4252	150	0.860727	0.678194	1.09239	0.217452	0.801968	4228	124	0.802
CCL21	seq.2516.57	0.949524	0.811374	1.1112	0.518504	0.998072	4567	172	0.878781	0.735767	1.04959	0.153903	0.999831	4542	145	0.953363	0.809117	1.12332	0.568269	0.998408	4252	150	0.875765	0.723203	1.06051	0.174336	0.801968	4228	124	0.802
MPI	seq.25233.2	1.07184	0.864583	1.32879	0.52686	0.998072	4567	172	1.15843	0.936687	1.43267	0.174891	0.999831	4542	145	1.06607	0.829487	1.37012	0.617268	0.998408	4252	150	1.18228	0.907366	1.5405	0.214944	0.801968	4228	124	0.802
HECTD3	seq.25244.9	1.1118	0.961737	1.28529	0.151964	0.998072	4567	172	1.117	0.949343	1.31426	0.182373	0.999831	4542	145	1.15938	1.00093	1.34291	0.048558	0.92329	4252	150	1.16317	0.985087	1.37345	0.0746218	0.801521	4228	124	0.802
GNAS|GNAS	seq.25253.17	1.15135	0.971412	1.36463	0.104061	0.998072	4567	172	1.16052	0.978669	1.37615	0.0868915	0.999831	4542	145	1.12584	0.94807	1.33694	0.176439	0.998408	4252	150	1.12351	0.944939	1.33584	0.187266	0.801968	4228	124	0.802
EEF1A1	seq.25256.23	0.946681	0.697139	1.28555	0.725595	0.998072	4567	172	1.13931	0.823389	1.57645	0.431185	0.999831	4542	145	1.03558	0.750128	1.42966	0.831714	0.998408	4252	150	1.27274	0.91374	1.77278	0.153741	0.801968	4228	124	0.802
SPATA5	seq.25258.41	0.83114	0.655542	1.05378	0.126653	0.998072	4567	172	0.777167	0.595826	1.0137	0.062939	0.999831	4542	145	0.845092	0.651583	1.09607	0.204585	0.998408	4252	150	0.800071	0.604613	1.05872	0.118581	0.801521	4228	124	0.802
ANKS3	seq.25261.42	0.928684	0.783973	1.10011	0.391954	0.998072	4567	172	0.879032	0.709223	1.0895	0.239069	0.999831	4542	145	0.914062	0.764429	1.09299	0.32454	0.998408	4252	150	0.837831	0.670233	1.04734	0.120226	0.801521	4228	124	0.802
ANKRD2	seq.25274.2	1.07306	0.928459	1.24019	0.339644	0.998072	4567	172	1.13373	0.978667	1.31335	0.0944007	0.999831	4542	145	1.05605	0.902475	1.23576	0.496391	0.998408	4252	150	1.12143	0.954459	1.31762	0.16352	0.801968	4228	124	0.802
NVL	seq.25279.44	0.865611	0.707566	1.05896	0.160596	0.998072	4567	172	0.846307	0.666234	1.07505	0.171586	0.999831	4542	145	0.839198	0.67353	1.04561	0.118181	0.998408	4252	150	0.805997	0.611717	1.06198	0.125359	0.801521	4228	124	0.802
AMOT	seq.25296.3	1.06452	0.873931	1.29668	0.534469	0.998072	4567	172	1.11467	0.918257	1.3531	0.272332	0.999831	4542	145	1.11388	0.930922	1.3328	0.238752	0.998408	4252	150	1.15803	0.966201	1.38794	0.112313	0.801521	4228	124	0.802
SH3PXD2B	seq.25297.11	0.975889	0.799669	1.19094	0.810176	0.998072	4567	172	1.00654	0.813288	1.24571	0.952207	0.999831	4542	145	1.10435	0.883444	1.38049	0.383393	0.998408	4252	150	1.16783	0.923143	1.47737	0.195893	0.801968	4228	124	0.802
CCDC140	seq.25409.5	0.859646	0.729987	1.01233	0.0698265	0.998072	4567	172	0.844693	0.698874	1.02094	0.0808632	0.999831	4542	145	0.859069	0.716583	1.02989	0.100649	0.998408	4252	150	0.833883	0.668252	1.04057	0.107834	0.801521	4228	124	0.802
SPANXN4	seq.25419.59	0.890498	0.73471	1.07932	0.237194	0.998072	4567	172	0.872825	0.696313	1.09408	0.23801	0.999831	4542	145	0.866363	0.703574	1.06682	0.176729	0.998408	4252	150	0.823033	0.63521	1.06639	0.140586	0.801968	4228	124	0.802
SYT12	seq.25424.234	0.867101	0.726101	1.03548	0.115277	0.998072	4567	172	0.843176	0.684471	1.03868	0.108871	0.999831	4542	145	0.8999	0.752937	1.07555	0.246286	0.998408	4252	150	0.86669	0.699805	1.07337	0.189812	0.801968	4228	124	0.802
NSUN6	seq.25433.25	0.885162	0.759655	1.03141	0.117904	0.998072	4567	172	0.888933	0.750854	1.0524	0.171636	0.999831	4542	145	0.882707	0.754088	1.03326	0.120482	0.998408	4252	150	0.890785	0.747907	1.06096	0.194765	0.801968	4228	124	0.802
SCCPDH	seq.25436.44	1.14424	0.985097	1.32909	0.0778198	0.998072	4567	172	1.1224	0.957458	1.31577	0.154469	0.999831	4542	145	1.16608	1.00148	1.35772	0.047805	0.92329	4252	150	1.13154	0.958314	1.33609	0.144911	0.801968	4228	124	0.802
NT5DC1	seq.25438.288	0.906633	0.777543	1.05715	0.211021	0.998072	4567	172	0.868573	0.721577	1.04551	0.136354	0.999831	4542	145	0.908411	0.771726	1.06931	0.248262	0.998408	4252	150	0.861878	0.701137	1.05947	0.158112	0.801968	4228	124	0.802
PRKAR2B	seq.25463.3	0.966867	0.728027	1.28406	0.815945	0.998072	4567	172	1.09642	0.820029	1.46596	0.534516	0.999831	4542	145	1.07447	0.793682	1.45459	0.642092	0.998408	4252	150	1.28357	0.952701	1.72935	0.100711	0.801521	4228	124	0.802
FNTA	seq.25473.62	1.05002	0.884867	1.246	0.576133	0.998072	4567	172	1.10475	0.93424	1.30638	0.244137	0.999831	4542	145	1.07711	0.902145	1.28601	0.411453	0.998408	4252	150	1.13792	0.965596	1.341	0.123041	0.801521	4228	124	0.802
LNPK	seq.25491.54	1.0868	0.956573	1.23476	0.201172	0.998072	4567	172	1.09197	0.960191	1.24184	0.179955	0.999831	4542	145	1.10125	0.964975	1.25678	0.152425	0.998408	4252	150	1.09123	0.955559	1.24617	0.197429	0.801968	4228	124	0.802
RAB11FIP3	seq.25500.6	0.92743	0.707291	1.21609	0.585804	0.998072	4567	172	1.01936	0.779331	1.33332	0.888681	0.999831	4542	145	1.09158	0.834581	1.42771	0.522331	0.998408	4252	150	1.20416	0.942187	1.53897	0.137746	0.801521	4228	124	0.802
MMP9	seq.2579.17	1.05496	0.874752	1.27229	0.575601	0.998072	4567	172	1.14662	0.939954	1.39873	0.177235	0.999831	4542	145	1.07256	0.873033	1.3177	0.504743	0.998408	4252	150	1.16928	0.938365	1.45701	0.163547	0.801968	4228	124	0.802
MPO	seq.2580.83	0.909749	0.773897	1.06945	0.25168	0.998072	4567	172	0.936945	0.790644	1.11032	0.452111	0.999831	4542	145	0.86795	0.724233	1.04019	0.125175	0.998408	4252	150	0.883533	0.729953	1.06943	0.203719	0.801968	4228	124	0.802
CRTC3	seq.25901.3	0.817065	0.654852	1.01946	0.0735654	0.998072	4567	172	0.833497	0.653444	1.06316	0.142445	0.999831	4542	145	0.826052	0.655972	1.04023	0.104233	0.998408	4252	150	0.849198	0.660246	1.09222	0.20302	0.801968	4228	124	0.802
EML2	seq.25907.47	0.864834	0.736022	1.01619	0.0775909	0.998072	4567	172	0.90399	0.766822	1.06569	0.229289	0.999831	4542	145	0.825557	0.680395	1.00169	0.0520295	0.926196	4252	150	0.857825	0.703038	1.04669	0.130915	0.801521	4228	124	0.802
FKBP1A	seq.25912.131	1.08013	0.927355	1.25808	0.321832	0.998072	4567	172	1.10418	0.93697	1.30123	0.236841	0.999831	4542	145	1.09726	0.937606	1.28411	0.247287	0.998408	4252	150	1.14425	0.969204	1.35091	0.111669	0.801521	4228	124	0.802
FTH1	seq.25913.17	1.04781	0.891761	1.23116	0.570308	0.998072	4567	172	1.05352	0.874832	1.26871	0.582435	0.999831	4542	145	1.11865	0.959927	1.30362	0.15096	0.998408	4252	150	1.12672	0.946248	1.34161	0.180366	0.801968	4228	124	0.802
HLA-E	seq.25918.60	1.04185	0.870841	1.24644	0.654015	0.998072	4567	172	1.10221	0.913399	1.33004	0.310052	0.999831	4542	145	1.08389	0.897133	1.30953	0.403751	0.998408	4252	150	1.15823	0.951425	1.40999	0.14325	0.801968	4228	124	0.802
LRP5	seq.25922.7	0.972805	0.844355	1.1208	0.70275	0.998072	4567	172	0.88077	0.752767	1.03054	0.113067	0.999831	4542	145	0.98789	0.843239	1.15735	0.8801	0.998408	4252	150	0.865518	0.724743	1.03364	0.110779	0.801521	4228	124	0.802
SRY	seq.25957.5	0.975571	0.842773	1.12929	0.740428	0.998072	4567	172	0.940408	0.797591	1.1088	0.464724	0.999831	4542	145	0.891274	0.742466	1.06991	0.216831	0.998408	4252	150	0.866265	0.701442	1.06982	0.182446	0.801968	4228	124	0.802
PLS3	seq.25960.15	1.06972	0.925921	1.23584	0.360183	0.998072	4567	172	1.12111	0.95658	1.31395	0.158009	0.999831	4542	145	1.08998	0.940621	1.26306	0.251843	0.998408	4252	150	1.15495	0.975448	1.36749	0.0946113	0.801521	4228	124	0.802
WNK1	seq.25962.51	1.01769	0.806667	1.28391	0.882431	0.998072	4567	172	1.10449	0.882929	1.38166	0.38428	0.999831	4542	145	1.11905	0.883642	1.41717	0.350602	0.998408	4252	150	1.21189	0.967617	1.51782	0.0942552	0.801521	4228	124	0.802
IL13RA1	seq.2633.52	0.862768	0.70787	1.05156	0.14373	0.998072	4567	172	0.827548	0.658935	1.03931	0.103455	0.999831	4542	145	0.882013	0.70781	1.09909	0.263413	0.998408	4252	150	0.833259	0.640178	1.08457	0.174994	0.801968	4228	124	0.802
TNFRSF1A	seq.2654.19	1.14209	0.913273	1.42823	0.244144	0.998072	4567	172	1.19564	0.937156	1.52542	0.150506	0.999831	4542	145	1.16773	0.921048	1.48048	0.200292	0.998408	4252	150	1.22387	0.937084	1.59842	0.13808	0.801521	4228	124	0.802
NTRK3	seq.2658.27	0.924979	0.770661	1.1102	0.402353	0.998072	4567	172	0.842372	0.700982	1.01228	0.067282	0.999831	4542	145	0.941831	0.765607	1.15862	0.5707	0.998408	4252	150	0.833922	0.674086	1.03166	0.094343	0.801521	4228	124	0.802
TNFRSF17	seq.2665.26	1.11512	0.95456	1.30268	0.169537	0.998072	4567	172	1.08151	0.913769	1.28003	0.362165	0.999831	4542	145	1.15626	0.974688	1.37166	0.0957449	0.998408	4252	150	1.13214	0.932072	1.37516	0.210947	0.801968	4228	124	0.802
CKM	seq.2670.67	1.1261	0.968531	1.30931	0.122529	0.998072	4567	172	1.14611	0.981142	1.33883	0.08545	0.999831	4542	145	1.09863	0.93856	1.286	0.241688	0.998408	4252	150	1.13025	0.963149	1.32634	0.133614	0.801521	4228	124	0.802
HGF	seq.2681.23	1.12771	0.982215	1.29476	0.0881242	0.998072	4567	172	1.09906	0.945114	1.27809	0.219887	0.999831	4542	145	1.13276	0.973679	1.31782	0.106415	0.998408	4252	150	1.1156	0.949771	1.31039	0.182743	0.801968	4228	124	0.802
HSPD1	seq.2682.68	1.0001	0.764804	1.30777	0.999443	0.999657	4567	172	1.09479	0.813496	1.47334	0.550052	0.999831	4542	145	1.12088	0.839683	1.49625	0.438727	0.998408	4252	150	1.26233	0.920351	1.73138	0.148423	0.801968	4228	124	0.802
PSPN	seq.2696.87	1.17217	1.04122	1.31958	0.00857897	0.839944	4567	172	1.14892	1.00708	1.31073	0.0389243	0.999831	4542	145	1.13686	0.995209	1.29868	0.0588565	0.92785	4252	150	1.10407	0.946636	1.28768	0.207199	0.801968	4228	124	0.802
AIMP1	seq.2714.78	0.938779	0.771202	1.14277	0.528876	0.998072	4567	172	0.87413	0.713047	1.0716	0.195485	0.999831	4542	145	0.949627	0.777406	1.16	0.612679	0.998408	4252	150	0.874901	0.708694	1.08009	0.213765	0.801968	4228	124	0.802
NANOG	seq.2732.58	1.02536	0.87939	1.19556	0.749245	0.998072	4567	172	0.931894	0.804561	1.07938	0.346713	0.999831	4542	145	0.987469	0.824072	1.18326	0.891318	0.998408	4252	150	0.842143	0.692059	1.02478	0.0862332	0.801521	4228	124	0.802
SIGLEC6	seq.2741.22	0.977358	0.839857	1.13737	0.767187	0.998072	4567	172	0.931985	0.783988	1.10792	0.424642	0.999831	4542	145	0.915307	0.762646	1.09853	0.341811	0.998408	4252	150	0.838956	0.677939	1.03822	0.106299	0.801521	4228	124	0.802
ULBP3	seq.2747.3	1.05075	0.887745	1.24369	0.564895	0.998072	4567	172	1.09963	0.929169	1.30137	0.269092	0.999831	4542	145	1.08067	0.920646	1.2685	0.342721	0.998408	4252	150	1.11936	0.94836	1.3212	0.182486	0.801968	4228	124	0.802
GDF11|MSTN	seq.2765.4	0.908445	0.762043	1.08297	0.284187	0.998072	4567	172	0.831636	0.688119	1.00508	0.0564517	0.999831	4542	145	0.918497	0.753173	1.12011	0.401074	0.998408	4252	150	0.814701	0.651526	1.01874	0.0723111	0.801521	4228	124	0.802
HPX	seq.2768.56	0.903196	0.772803	1.05559	0.200571	0.998072	4567	172	0.891389	0.754246	1.05347	0.177367	0.999831	4542	145	0.883838	0.746977	1.04577	0.15027	0.998408	4252	150	0.862019	0.719929	1.03215	0.10617	0.801521	4228	124	0.802
IL22	seq.2778.10	1.08802	0.960856	1.23202	0.183414	0.998072	4567	172	1.09829	0.960885	1.25534	0.169172	0.999831	4542	145	1.1165	0.974213	1.27957	0.113106	0.998408	4252	150	1.10829	0.952701	1.28929	0.182793	0.801968	4228	124	0.802
CCL8	seq.2785.15	0.891392	0.758409	1.04769	0.163081	0.998072	4567	172	0.870636	0.72701	1.04264	0.132045	0.999831	4542	145	0.905112	0.758804	1.07963	0.267742	0.998408	4252	150	0.867695	0.706969	1.06496	0.174522	0.801968	4228	124	0.802
MMP3	seq.2788.55	1.17888	0.969772	1.43307	0.0985558	0.998072	4567	172	1.18995	0.955625	1.48174	0.120104	0.999831	4542	145	1.15539	0.934208	1.42894	0.182771	0.998408	4252	150	1.17728	0.927872	1.49372	0.179057	0.801968	4228	124	0.802
MMP7	seq.2789.26	1.14523	0.966588	1.35688	0.117058	0.998072	4567	172	1.1881	0.989089	1.42715	0.0653714	0.999831	4542	145	1.11525	0.915214	1.35902	0.279453	0.998408	4252	150	1.16359	0.938124	1.44324	0.167972	0.801968	4228	124	0.802
ACVR1B	seq.2806.49	0.830284	0.670554	1.02806	0.0879872	0.998072	4567	172	0.829768	0.67251	1.0238	0.0817519	0.999831	4542	145	0.8624	0.699945	1.06256	0.164484	0.998408	4252	150	0.853745	0.686363	1.06195	0.155555	0.801968	4228	124	0.802
AGRP	seq.2813.11	1.1035	0.929164	1.31056	0.261613	0.998072	4567	172	1.09421	0.893653	1.33978	0.383447	0.999831	4542	145	1.17393	0.9748	1.41374	0.0908602	0.990082	4252	150	1.15565	0.922655	1.44748	0.207937	0.801968	4228	124	0.802
SPINT1	seq.2828.82	0.93302	0.754977	1.15305	0.521032	0.998072	4567	172	0.859025	0.679176	1.0865	0.204857	0.999831	4542	145	0.910329	0.725309	1.14255	0.417684	0.998408	4252	150	0.81601	0.635365	1.04802	0.111241	0.801521	4228	124	0.802
KLK4	seq.2833.20	0.914854	0.780946	1.07172	0.270405	0.998072	4567	172	0.909101	0.763277	1.08278	0.285358	0.999831	4542	145	0.890574	0.750103	1.05735	0.185754	0.998408	4252	150	0.865091	0.715622	1.04578	0.13427	0.801521	4228	124	0.802
KLK8	seq.2834.54	1.10739	0.924653	1.32624	0.267596	0.998072	4567	172	1.15098	0.944077	1.40322	0.164285	0.999831	4542	145	1.11327	0.912369	1.35842	0.290609	0.998408	4252	150	1.15199	0.919631	1.44305	0.218306	0.801968	4228	124	0.802
TIE1	seq.2844.53	0.943879	0.791745	1.12525	0.519516	0.998072	4567	172	0.878648	0.729538	1.05823	0.172736	0.999831	4542	145	0.908458	0.744821	1.10805	0.343395	0.998408	4252	150	0.850268	0.685703	1.05433	0.139418	0.801968	4228	124	0.802
WIF1	seq.2848.2	0.96726	0.827885	1.1301	0.674974	0.998072	4567	172	0.888736	0.75347	1.04829	0.161449	0.999831	4542	145	0.985943	0.833407	1.1664	0.868879	0.998408	4252	150	0.893149	0.747517	1.06715	0.213384	0.801968	4228	124	0.802
MAPK3	seq.2855.49	1.00651	0.747419	1.35543	0.965892	0.998072	4567	172	1.18003	0.869685	1.60113	0.287676	0.999831	4542	145	1.05148	0.773051	1.4302	0.749072	0.998408	4252	150	1.23832	0.907732	1.6893	0.177324	0.801968	4228	124	0.802
HAT1	seq.2858.29	0.995049	0.857705	1.15439	0.947782	0.998072	4567	172	0.981919	0.842184	1.14484	0.815791	0.999831	4542	145	0.921213	0.795396	1.06693	0.273392	0.998408	4252	150	0.888456	0.76851	1.02712	0.109967	0.801521	4228	124	0.802
AKT1	seq.2867.52	0.99616	0.716603	1.38478	0.981737	0.998072	4567	172	1.07573	0.762091	1.51846	0.678062	0.999831	4542	145	1.12916	0.827139	1.54147	0.444307	0.998408	4252	150	1.24455	0.915763	1.69137	0.162183	0.801968	4228	124	0.802
MDK	seq.2911.27	1.08642	0.928488	1.27121	0.301042	0.998072	4567	172	1.0754	0.909072	1.27217	0.396444	0.999831	4542	145	1.1379	0.9709	1.33363	0.110642	0.998408	4252	150	1.11458	0.946387	1.31267	0.193681	0.801968	4228	124	0.802
CCL23	seq.2913.1	1.06827	0.887077	1.28647	0.486171	0.998072	4567	172	1.13408	0.932449	1.3793	0.207766	0.999831	4542	145	1.07095	0.868903	1.31998	0.520478	0.998408	4252	150	1.16655	0.933591	1.45765	0.175286	0.801968	4228	124	0.802
CYP3A4	seq.2943.5	0.876765	0.741448	1.03678	0.124123	0.998072	4567	172	0.844529	0.694734	1.02662	0.0898393	0.999831	4542	145	0.899738	0.746785	1.08402	0.266411	0.998408	4252	150	0.854734	0.688212	1.06155	0.155678	0.801968	4228	124	0.802
CLEC11A	seq.2966.65	1.05166	0.873599	1.26602	0.59457	0.998072	4567	172	1.0799	0.879408	1.32611	0.46318	0.999831	4542	145	1.14872	0.946709	1.39383	0.160011	0.998408	4252	150	1.18694	0.957014	1.4721	0.118751	0.801521	4228	124	0.802
AREG	seq.2970.60	1.01684	0.796247	1.29855	0.893522	0.998072	4567	172	1.08173	0.838054	1.39625	0.546328	0.999831	4542	145	1.09696	0.857339	1.40356	0.461764	0.998408	4252	150	1.17548	0.908589	1.52078	0.218528	0.801968	4228	124	0.802
CXCL3	seq.2986.49	1.07846	0.891316	1.3049	0.43729	0.998072	4567	172	1.12245	0.915862	1.37564	0.265671	0.999831	4542	145	1.12986	0.933879	1.36696	0.209059	0.998408	4252	150	1.18109	0.963732	1.44748	0.108715	0.801521	4228	124	0.802
JAM2	seq.2997.8	1.17825	0.99086	1.40108	0.0634385	0.998072	4567	172	1.15367	0.955198	1.39339	0.137777	0.999831	4542	145	1.25451	1.04687	1.50334	0.0140419	0.85496	4252	150	1.20419	0.982268	1.47626	0.0737998	0.801521	4228	124	0.802
CTLA4	seq.3022.4	1.14307	1.00025	1.30628	0.0495753	0.998072	4567	172	1.15916	1.00326	1.33928	0.0450523	0.999831	4542	145	1.12445	0.965008	1.31023	0.132724	0.998408	4252	150	1.1399	0.961922	1.3508	0.130591	0.801521	4228	124	0.802
CAST	seq.3026.5	1.00931	0.860705	1.18358	0.909182	0.998072	4567	172	0.936872	0.778654	1.12724	0.489607	0.999831	4542	145	0.943756	0.786768	1.13207	0.532869	0.998408	4252	150	0.872515	0.703652	1.0819	0.213984	0.801968	4228	124	0.802
CXCL11	seq.3038.9	1.06769	0.871389	1.30822	0.52746	0.998072	4567	172	1.13473	0.918648	1.40164	0.240907	0.999831	4542	145	1.09872	0.884965	1.36411	0.393714	0.998408	4252	150	1.20898	0.974166	1.5004	0.0849885	0.801521	4228	124	0.802
MRC2	seq.3041.55	1.04216	0.878236	1.23668	0.636242	0.998072	4567	172	0.928518	0.779024	1.1067	0.407639	0.999831	4542	145	1.01544	0.833541	1.23702	0.879108	0.998408	4252	150	0.874864	0.71226	1.07459	0.202561	0.801968	4228	124	0.802
RETN	seq.3046.31	1.13535	0.927757	1.38939	0.217892	0.998072	4567	172	1.16123	0.926208	1.4559	0.195113	0.999831	4542	145	1.19208	0.959814	1.48055	0.112049	0.998408	4252	150	1.2166	0.950953	1.55646	0.118788	0.801521	4228	124	0.802
HP	seq.3054.3	1.09074	0.911185	1.30567	0.343919	0.998072	4567	172	1.0916	0.893598	1.33347	0.390729	0.999831	4542	145	1.17241	0.94993	1.44699	0.138462	0.998408	4252	150	1.16946	0.919586	1.48723	0.2018	0.801968	4228	124	0.802
IL4R	seq.3055.54	0.894603	0.742636	1.07767	0.240978	0.998072	4567	172	0.885568	0.716239	1.09493	0.261695	0.999831	4542	145	0.815688	0.657613	1.01176	0.063793	0.940944	4252	150	0.82652	0.648634	1.05319	0.123346	0.801521	4228	124	0.802
GDF9	seq.3067.67	1.07161	0.877248	1.30902	0.498193	0.998072	4567	172	1.16249	0.944801	1.43033	0.154664	0.999831	4542	145	1.05757	0.82992	1.34767	0.650829	0.998408	4252	150	1.18143	0.919208	1.51845	0.192888	0.801968	4228	124	0.802
IL2	seq.3070.1	0.8917	0.748847	1.0618	0.198169	0.998072	4567	172	0.821619	0.656081	1.02893	0.0869713	0.999831	4542	145	0.917219	0.764631	1.10026	0.351956	0.998408	4252	150	0.848903	0.667286	1.07995	0.182288	0.801968	4228	124	0.802
EDA2R	seq.3083.71	1.03222	0.894936	1.19056	0.663177	0.998072	4567	172	1.10235	0.957111	1.26963	0.176421	0.999831	4542	145	1.0213	0.874688	1.19248	0.789822	0.998408	4252	150	1.10224	0.952587	1.27541	0.191023	0.801968	4228	124	0.802
DIABLO	seq.3122.6	1.04119	0.900932	1.20328	0.584549	0.998072	4567	172	1.05857	0.905058	1.23811	0.476451	0.999831	4542	145	1.08015	0.922536	1.2647	0.338012	0.998408	4252	150	1.12202	0.953376	1.3205	0.165914	0.801968	4228	124	0.802
VEGFC	seq.3132.1	1.07037	0.904911	1.26608	0.427339	0.998072	4567	172	1.11669	0.955153	1.30554	0.166227	0.999831	4542	145	1.07732	0.904334	1.2834	0.404295	0.998408	4252	150	1.12558	0.958427	1.32188	0.149219	0.801968	4228	124	0.802
METAP2	seq.3170.6	0.963329	0.705271	1.31581	0.814333	0.998072	4567	172	1.16566	0.848538	1.60129	0.344055	0.999831	4542	145	1.0282	0.732249	1.44376	0.872439	0.998408	4252	150	1.27251	0.912506	1.77455	0.155503	0.801968	4228	124	0.802
CTSA	seq.3179.51	1.06462	0.889505	1.2742	0.494657	0.998072	4567	172	1.14612	0.955048	1.37541	0.142732	0.999831	4542	145	1.0401	0.848775	1.27455	0.704636	0.998408	4252	150	1.16658	0.94436	1.4411	0.152991	0.801968	4228	124	0.802
ENTPD1	seq.3182.38	0.96387	0.824803	1.12638	0.643433	0.998072	4567	172	0.877407	0.73919	1.04147	0.134808	0.999831	4542	145	0.973563	0.834678	1.13556	0.732967	0.998408	4252	150	0.872193	0.736686	1.03263	0.112437	0.801521	4228	124	0.802
FCER2	seq.3291.30	1.03158	0.88098	1.20792	0.699396	0.998072	4567	172	1.09257	0.922151	1.29447	0.306191	0.999831	4542	145	1.04568	0.879393	1.24342	0.613186	0.998408	4252	150	1.12605	0.933797	1.35787	0.213915	0.801968	4228	124	0.802
CFC1	seq.3294.55	1.08532	0.900862	1.30755	0.388963	0.998072	4567	172	1.04007	0.850726	1.27155	0.70159	0.999831	4542	145	1.21719	1.02103	1.45104	0.0283673	0.87466	4252	150	1.15272	0.945	1.40611	0.160922	0.801968	4228	124	0.802
CST7	seq.3302.58	1.07759	0.941171	1.23378	0.279234	0.998072	4567	172	1.10446	0.962713	1.26707	0.156263	0.999831	4542	145	1.11789	0.959765	1.30208	0.152078	0.998408	4252	150	1.14953	0.979939	1.34847	0.0870521	0.801521	4228	124	0.802
FCGR2A	seq.3309.2	1.19778	1.00046	1.43403	0.0494189	0.998072	4567	172	1.22149	1.00458	1.48524	0.0448791	0.999831	4542	145	1.18362	0.977462	1.43326	0.0842522	0.983043	4252	150	1.20839	0.976931	1.49468	0.0810101	0.801521	4228	124	0.802
FCGR2B	seq.3310.62	1.12087	0.956	1.31417	0.159821	0.998072	4567	172	1.09647	0.924687	1.30016	0.289447	0.999831	4542	145	1.14594	0.967744	1.35696	0.114158	0.998408	4252	150	1.13393	0.940841	1.36664	0.186935	0.801968	4228	124	0.802
HTRA2	seq.3317.33	1.04107	0.80959	1.33874	0.753741	0.998072	4567	172	1.02139	0.800988	1.30243	0.864521	0.999831	4542	145	1.1891	0.944967	1.49631	0.139618	0.998408	4252	150	1.17943	0.929353	1.4968	0.174658	0.801968	4228	124	0.802
PRKCI	seq.3379.29	0.991726	0.736061	1.33619	0.956442	0.998072	4567	172	1.17379	0.880769	1.56429	0.274154	0.999831	4542	145	1.06268	0.778021	1.4515	0.702329	0.998408	4252	150	1.26948	0.940004	1.71444	0.11961	0.801521	4228	124	0.802
UFC1	seq.3405.6	0.96157	0.688699	1.34255	0.81799	0.998072	4567	172	1.09359	0.7751	1.54295	0.610462	0.999831	4542	145	1.10609	0.792233	1.54429	0.553731	0.998408	4252	150	1.27122	0.917576	1.76115	0.149072	0.801968	4228	124	0.802
BMX	seq.3414.40	0.95174	0.824921	1.09806	0.497807	0.998072	4567	172	0.948736	0.813554	1.10638	0.502225	0.999831	4542	145	0.894472	0.764521	1.04651	0.163805	0.998408	4252	150	0.875934	0.736879	1.04123	0.133123	0.801521	4228	124	0.802
CA13	seq.3420.21	0.957953	0.70066	1.30973	0.787787	0.998072	4567	172	1.03857	0.738378	1.46081	0.827862	0.999831	4542	145	1.09726	0.802901	1.49955	0.56026	0.998408	4252	150	1.23204	0.891333	1.70299	0.206418	0.801968	4228	124	0.802
CSNK2A1	seq.3427.63	0.921885	0.744114	1.14213	0.456785	0.998072	4567	172	0.919526	0.730218	1.15791	0.475625	0.999831	4542	145	0.874543	0.70143	1.09038	0.233591	0.998408	4252	150	0.848222	0.659472	1.091	0.199902	0.801968	4228	124	0.802
LCK	seq.3452.17	1.10442	0.964573	1.26455	0.150482	0.998072	4567	172	1.1082	0.965073	1.27256	0.145356	0.999831	4542	145	1.12314	0.970338	1.3	0.119607	0.998408	4252	150	1.12099	0.963946	1.30362	0.138031	0.801521	4228	124	0.802
CXCL6	seq.3495.15	0.993134	0.820747	1.20173	0.943536	0.998072	4567	172	1.02037	0.836191	1.24513	0.842586	0.999831	4542	145	1.08916	0.893691	1.32737	0.397403	0.998408	4252	150	1.15391	0.939298	1.41754	0.172717	0.801968	4228	124	0.802
ITGA1|ITGB1	seq.3503.4	0.997905	0.772851	1.28849	0.987165	0.998072	4567	172	1.10772	0.854685	1.43568	0.439385	0.999831	4542	145	1.05712	0.807387	1.38409	0.686238	0.998408	4252	150	1.18968	0.909014	1.557	0.205825	0.801968	4228	124	0.802
CPB2	seq.3518.54	0.841131	0.714487	0.990223	0.0377089	0.998072	4567	172	0.864995	0.721371	1.03722	0.11745	0.999831	4542	145	0.826318	0.686687	0.994341	0.0433744	0.92329	4252	150	0.848969	0.686278	1.05023	0.131431	0.801521	4228	124	0.802
CGA|TSHB	seq.3521.16	1.18274	1.03234	1.35506	0.0155784	0.912791	4567	172	1.16698	0.996437	1.36672	0.0554014	0.999831	4542	145	1.15832	1.0038	1.33661	0.044224	0.92329	4252	150	1.16041	0.981472	1.37197	0.081661	0.801521	4228	124	0.802
CDH6	seq.3591.51	0.855938	0.695585	1.05326	0.141627	0.998072	4567	172	0.875681	0.696964	1.10023	0.254342	0.999831	4542	145	0.829368	0.649807	1.05855	0.132856	0.998408	4252	150	0.837427	0.636971	1.10097	0.203748	0.801968	4228	124	0.802
PRSS27	seq.3624.3	0.852853	0.700138	1.03888	0.113851	0.998072	4567	172	0.828636	0.673062	1.02017	0.0764315	0.999831	4542	145	0.865097	0.702892	1.06473	0.171338	0.998408	4252	150	0.832327	0.665933	1.0403	0.106783	0.801521	4228	124	0.802
TLR4|LY96	seq.3647.49	0.908139	0.749856	1.09983	0.324069	0.998072	4567	172	0.857128	0.69365	1.05913	0.153321	0.999831	4542	145	0.892789	0.720653	1.10604	0.299394	0.998408	4252	150	0.838357	0.658569	1.06723	0.152236	0.801968	4228	124	0.802
CDKN1B	seq.3719.2	0.831008	0.685367	1.0076	0.0596987	0.998072	4567	172	0.811021	0.644602	1.02041	0.0738395	0.999831	4542	145	0.817661	0.65975	1.01337	0.0659575	0.949223	4252	150	0.810473	0.626731	1.04808	0.109159	0.801521	4228	124	0.802
NPPB	seq.3723.1	1.16409	1.02878	1.3172	0.0159483	0.912791	4567	172	1.13257	0.984587	1.30279	0.0814083	0.999831	4542	145	1.14659	0.999392	1.31547	0.0510178	0.926196	4252	150	1.1277	0.964684	1.31826	0.131389	0.801521	4228	124	0.802
PYY	seq.3727.35	1.05068	0.886492	1.24527	0.568521	0.998072	4567	172	1.05553	0.882971	1.26181	0.552926	0.999831	4542	145	1.12027	0.934644	1.34276	0.21917	0.998408	4252	150	1.13948	0.94515	1.37378	0.171096	0.801968	4228	124	0.802
STX1A	seq.3766.51	1.12649	0.970394	1.30769	0.117561	0.998072	4567	172	1.09077	0.91955	1.29386	0.318633	0.999831	4542	145	1.17594	0.985897	1.40263	0.0715332	0.957162	4252	150	1.14303	0.931016	1.40332	0.201559	0.801968	4228	124	0.802
ADAM9	seq.3795.6	1.14325	0.989325	1.32113	0.0695944	0.998072	4567	172	1.1333	0.972874	1.32017	0.108087	0.999831	4542	145	1.1184	0.957598	1.3062	0.157682	0.998408	4252	150	1.14034	0.972576	1.33704	0.10577	0.801521	4228	124	0.802
EPHA5	seq.3806.55	0.904693	0.763024	1.07266	0.249028	0.998072	4567	172	0.875083	0.72281	1.05944	0.171296	0.999831	4542	145	0.862645	0.716879	1.03805	0.117685	0.998408	4252	150	0.865807	0.699872	1.07109	0.18438	0.801968	4228	124	0.802
PAK6	seq.3827.22	1.15211	0.927684	1.43083	0.200218	0.998072	4567	172	1.2484	1.00496	1.5508	0.0449962	0.999831	4542	145	1.12332	0.884798	1.42614	0.339617	0.998408	4252	150	1.21062	0.954907	1.53482	0.114369	0.801521	4228	124	0.802
PDGFC	seq.3828.54	1.04811	0.882419	1.24492	0.59249	0.998072	4567	172	0.919854	0.734991	1.15121	0.465502	0.999831	4542	145	0.930249	0.749217	1.15502	0.512598	0.998408	4252	150	0.784515	0.593507	1.037	0.0882302	0.801521	4228	124	0.802
UFM1	seq.3836.51	0.964646	0.694921	1.33906	0.829682	0.998072	4567	172	1.09651	0.779177	1.54309	0.597106	0.999831	4542	145	1.09304	0.800232	1.493	0.576017	0.998408	4252	150	1.2746	0.942906	1.72298	0.114628	0.801521	4228	124	0.802
MDH1	seq.3853.56	1.0163	0.777236	1.32891	0.90591	0.998072	4567	172	1.15981	0.889027	1.51308	0.274437	0.999831	4542	145	1.05736	0.791138	1.41317	0.706257	0.998408	4252	150	1.22507	0.918723	1.63356	0.166782	0.801968	4228	124	0.802
PRDX1	seq.3855.56	0.956334	0.741944	1.23267	0.73028	0.998072	4567	172	1.10336	0.859645	1.41617	0.439881	0.999831	4542	145	1.08224	0.823717	1.4219	0.57037	0.998408	4252	150	1.27779	0.977851	1.66974	0.0725092	0.801521	4228	124	0.802
SBDS	seq.3866.7	1.03906	0.779407	1.3852	0.793971	0.998072	4567	172	1.12443	0.843034	1.49974	0.424842	0.999831	4542	145	1.11846	0.8423	1.48517	0.439044	0.998408	4252	150	1.20954	0.915592	1.59786	0.1805	0.801968	4228	124	0.802
UBE2L3	seq.3874.8	1.06014	0.810464	1.38674	0.669927	0.998072	4567	172	1.17065	0.903422	1.51693	0.233351	0.999831	4542	145	1.13687	0.866149	1.4922	0.355261	0.998408	4252	150	1.26103	0.972195	1.63567	0.0805457	0.801521	4228	124	0.802
ARID3A	seq.3875.62	1.09712	0.930356	1.29377	0.27053	0.998072	4567	172	1.14201	0.967131	1.34852	0.117373	0.999831	4542	145	1.12284	0.939475	1.342	0.20278	0.998408	4252	150	1.17633	0.976573	1.41695	0.0872031	0.801521	4228	124	0.802
CDC37	seq.3879.50	1.14083	0.891343	1.46016	0.295352	0.998072	4567	172	1.16943	0.904912	1.51126	0.231584	0.999831	4542	145	1.2039	0.94986	1.52589	0.124881	0.998408	4252	150	1.24721	0.974197	1.59673	0.0796708	0.801521	4228	124	0.802
KPNB1	seq.3887.90	0.85234	0.617241	1.17699	0.331886	0.998072	4567	172	1.02185	0.715825	1.45871	0.905249	0.999831	4542	145	1.01299	0.720594	1.42403	0.940791	0.998408	4252	150	1.28828	0.907855	1.82812	0.156013	0.801968	4228	124	0.802
LDHB	seq.3890.8	1.06129	0.81072	1.3893	0.665089	0.998072	4567	172	1.12358	0.853303	1.47945	0.406556	0.999831	4542	145	1.12294	0.855643	1.47373	0.403173	0.998408	4252	150	1.20164	0.914722	1.57856	0.186953	0.801968	4228	124	0.802
PDXP	seq.3897.61	0.987784	0.739977	1.31858	0.933529	0.998072	4567	172	1.11976	0.836159	1.49954	0.44778	0.999831	4542	145	1.08075	0.799197	1.46149	0.614044	0.998408	4252	150	1.24216	0.923965	1.66992	0.150938	0.801968	4228	124	0.802
PSMD7	seq.3898.5	1.10931	0.943348	1.30447	0.209602	0.998072	4567	172	1.11621	0.930941	1.33834	0.235141	0.999831	4542	145	1.1431	0.968516	1.34915	0.113724	0.998408	4252	150	1.14912	0.952528	1.38628	0.146517	0.801968	4228	124	0.802
CFB	seq.4129.72	1.1578	0.977693	1.37109	0.0894142	0.998072	4567	172	1.09147	0.91435	1.3029	0.332632	0.999831	4542	145	1.2258	1.01772	1.47641	0.0319444	0.879506	4252	150	1.14518	0.935905	1.40124	0.187963	0.801968	4228	124	0.802
NTF3	seq.4145.58	0.91123	0.761327	1.09065	0.310711	0.998072	4567	172	0.855983	0.693312	1.05682	0.148154	0.999831	4542	145	0.905738	0.72885	1.12555	0.371812	0.998408	4252	150	0.813334	0.618241	1.06999	0.139799	0.801968	4228	124	0.802
PAPPA	seq.4148.49	1.07218	0.903157	1.27283	0.425886	0.998072	4567	172	1.08121	0.897233	1.30291	0.411935	0.999831	4542	145	1.12732	0.936764	1.35664	0.204604	0.998408	4252	150	1.13764	0.931466	1.38946	0.206199	0.801968	4228	124	0.802
SELP	seq.4154.57	1.09314	0.893618	1.3372	0.386443	0.998072	4567	172	1.15444	0.936488	1.42311	0.178527	0.999831	4542	145	1.12138	0.905662	1.38849	0.29327	0.998408	4252	150	1.16287	0.926669	1.45928	0.192724	0.801968	4228	124	0.802
VTA1	seq.4209.60	0.943658	0.676737	1.31586	0.732451	0.998072	4567	172	1.13927	0.804611	1.61313	0.462441	0.999831	4542	145	1.04611	0.735218	1.48846	0.802185	0.998408	4252	150	1.29641	0.911708	1.84344	0.148359	0.801968	4228	124	0.802
EPS15L1	seq.4212.5	0.989179	0.731024	1.3385	0.943786	0.998072	4567	172	1.09096	0.812498	1.46486	0.562586	0.999831	4542	145	1.12179	0.834305	1.50832	0.446796	0.998408	4252	150	1.25154	0.949445	1.64975	0.111401	0.801521	4228	124	0.802
FER	seq.4220.39	0.942539	0.680615	1.30526	0.721653	0.998072	4567	172	1.0527	0.739235	1.49909	0.775828	0.999831	4542	145	1.10433	0.781563	1.5604	0.573668	0.998408	4252	150	1.28565	0.903128	1.83018	0.163166	0.801968	4228	124	0.802
IGF1R	seq.4232.19	0.92067	0.766225	1.10625	0.377647	0.998072	4567	172	0.876023	0.718454	1.06815	0.190759	0.999831	4542	145	0.888369	0.720852	1.09481	0.266867	0.998408	4252	150	0.827432	0.660531	1.03651	0.0993405	0.801521	4228	124	0.802
L1CAM	seq.4246.40	0.953198	0.794908	1.14301	0.60492	0.998072	4567	172	0.906173	0.746956	1.09933	0.317597	0.999831	4542	145	0.929154	0.764132	1.12981	0.461392	0.998408	4252	150	0.85029	0.690099	1.04767	0.127813	0.801521	4228	124	0.802
NSFL1C	seq.4250.23	0.939063	0.684846	1.28765	0.696276	0.998072	4567	172	1.05211	0.768993	1.43945	0.750791	0.999831	4542	145	1.10821	0.837072	1.46718	0.472933	0.998408	4252	150	1.26148	0.976441	1.62973	0.0754764	0.801521	4228	124	0.802
PON1	seq.4261.55	1.0035	0.866939	1.16158	0.962632	0.998072	4567	172	0.929664	0.786565	1.0988	0.392435	0.999831	4542	145	0.959725	0.810894	1.13587	0.632539	0.998408	4252	150	0.854611	0.701277	1.04147	0.119416	0.801521	4228	124	0.802
RAN	seq.4282.3	1.02004	0.771203	1.34916	0.889408	0.998072	4567	172	1.19504	0.905258	1.57759	0.208564	0.999831	4542	145	1.08157	0.802328	1.45799	0.606835	0.998408	4252	150	1.27839	0.941678	1.73549	0.115324	0.801521	4228	124	0.802
NAPA	seq.4292.5	0.948375	0.67028	1.34185	0.764676	0.998072	4567	172	1.13882	0.801655	1.61778	0.468005	0.999831	4542	145	1.04243	0.720267	1.50869	0.825628	0.998408	4252	150	1.27886	0.893586	1.83024	0.178678	0.801968	4228	124	0.802
SAA1	seq.4336.2	0.924055	0.775651	1.10085	0.376555	0.998072	4567	172	0.832791	0.688547	1.00725	0.0593586	0.999831	4542	145	0.944939	0.784054	1.13884	0.552016	0.998408	4252	150	0.837858	0.684119	1.02615	0.0871841	0.801521	4228	124	0.802
DYRK3	seq.4359.87	1.01563	0.865903	1.19124	0.848872	0.998072	4567	172	0.905242	0.752507	1.08898	0.291007	0.999831	4542	145	1.01948	0.868678	1.19646	0.813246	0.998408	4252	150	0.885141	0.733826	1.06766	0.202105	0.801968	4228	124	0.802
FGF12	seq.4392.54	0.965265	0.802666	1.1608	0.707189	0.998072	4567	172	0.943892	0.778865	1.14388	0.555904	0.999831	4542	145	0.900748	0.71777	1.13037	0.366925	0.998408	4252	150	0.848067	0.662243	1.08603	0.191567	0.801968	4228	124	0.802
CHST6	seq.4429.51	1.02941	0.865596	1.22422	0.743088	0.998072	4567	172	1.01617	0.83831	1.23176	0.870224	0.999831	4542	145	0.901472	0.739392	1.09908	0.305014	0.998408	4252	150	0.854328	0.681681	1.0707	0.171654	0.801968	4228	124	0.802
HNRNPAB	seq.4450.26	1.03462	0.811351	1.31933	0.783765	0.998072	4567	172	1.21695	0.950189	1.55859	0.119881	0.999831	4542	145	1.07344	0.827648	1.39222	0.59323	0.998408	4252	150	1.25825	0.959287	1.65039	0.0969741	0.801521	4228	124	0.802
LRRTM3	seq.4453.83	0.995102	0.84554	1.17112	0.952877	0.998072	4567	172	0.902569	0.76814	1.06052	0.212826	0.999831	4542	145	0.983511	0.824925	1.17258	0.852968	0.998408	4252	150	0.865286	0.717217	1.04392	0.130768	0.801521	4228	124	0.802
C5|C6	seq.4482.66	1.10502	0.910797	1.34067	0.311251	0.998072	4567	172	1.0567	0.861452	1.29619	0.596723	0.999831	4542	145	1.22723	1.01095	1.48978	0.0384473	0.92329	4252	150	1.18411	0.961342	1.45851	0.112006	0.801521	4228	124	0.802
CLEC11A	seq.4500.50	1.03072	0.850639	1.24892	0.757456	0.998072	4567	172	1.06996	0.86736	1.31988	0.527816	0.999831	4542	145	1.11838	0.913219	1.36962	0.279242	0.998408	4252	150	1.1688	0.936	1.45951	0.168704	0.801968	4228	124	0.802
ADAMTS15	seq.4533.76	1.01972	0.878596	1.18351	0.797236	0.998072	4567	172	0.988036	0.837888	1.16509	0.886199	0.999831	4542	145	0.938152	0.79534	1.10661	0.448617	0.998408	4252	150	0.885169	0.730673	1.07233	0.21262	0.801968	4228	124	0.802
BST1	seq.4535.50	0.895816	0.771425	1.04026	0.149172	0.998072	4567	172	0.903491	0.773199	1.05574	0.201484	0.999831	4542	145	0.884657	0.754147	1.03775	0.132341	0.998408	4252	150	0.896294	0.756049	1.06256	0.207271	0.801968	4228	124	0.802
ADCYAP1	seq.4594.22	0.90193	0.738034	1.10222	0.313079	0.998072	4567	172	0.917861	0.743345	1.13335	0.42569	0.999831	4542	145	0.850853	0.669004	1.08213	0.187977	0.998408	4252	150	0.841944	0.640992	1.10589	0.216254	0.801968	4228	124	0.802
HIBADH	seq.4693.72	1.17786	1.04368	1.32929	0.00798345	0.839944	4567	172	1.15692	1.00594	1.33055	0.0410549	0.999831	4542	145	1.13228	0.998192	1.28438	0.0533766	0.926196	4252	150	1.13583	0.986392	1.30792	0.076789	0.801521	4228	124	0.802
FABP3	seq.4696.2	1.13683	0.978752	1.32044	0.0931813	0.998072	4567	172	1.12182	0.9389	1.34039	0.205588	0.999831	4542	145	1.16488	0.992106	1.36773	0.0624276	0.939686	4252	150	1.14279	0.943292	1.38448	0.172698	0.801968	4228	124	0.802
[truncated: 5,638 more rows]

## Sheet: S4_sex_stratified
Supplementary Table 4. Cox proportional hazard regression results on incident amyotrophic lateral sclerosis in sex-stratified models
[truncated: 9 more rows]

[truncated: 12 more sheets: S5_capped_excl, S6_correlations, S7_temporal_interaction, S8_prevalent_ALS, S9_candidates, S10_MR, S11_cross_disease, S12_GO_tissue, S13_PPI, S14_literature, S15_organ_clocks, S16_drug_repurposing]
